# Supplementary material
Source: publisher figshare collection journal article supplement (https://plos.figshare.com/articles/dataset/_/2585503)
Supplement: Supplementary file 1 [file 1 › S1 Dataset.xlsx]

## Sheet: S1 Dataset
	Dataset S1.		Data used for prediction of host genetic effects
Breed	Sire	Diet	Chamber	Block	Methane (g/day)	Methane (g/kg DMI)	A:B ratio (pm)	A:B ratio (live)
AA	AA1	CON	5	2	151	13.7493	2.44198	6.56581
AA	AA1	CON	4	1	174	17.1682	4.77221
AA	AA1	CON	6	1	189	16.2729	5.77128	3.88128
AA	AA1	CON	5	1	110	9.71084	1.02275
AA	AA1	CON	6	2	170	14.0936	3.28452	3.698
AA	AA1	FOR	6	1	215	18.3485	7.60375	6.39854
AA	AA1	FOR	3	1	208	21.9743	6.25494
AA	AA1	FOR	1	2	228	25.0105	4.20732	9.82353
AA	AA1	FOR	5	1	194	15.896	6.89956	4.99139
AA	AA2	CON	3	1	100	7.63458	1.68177	0.817844
AA	AA2	CON	2	3	206	16.9445	2.33223	2.43151
AA	AA2	CON	1	2	133	11.1898	1.79713	0.876106
AA	AA2	CON	1	1	169	17.8764	4.49274
AA	AA2	CON	3	2	142	15.1857	2.18324	8.47059
AA	AA2	CON	2	2	119	10.8443	1.62374	3.58808
AA	AA2	FOR	6	3	172	19.2467	4.71822	5.10433
AA	AA2	FOR	2	2	216	17.7178	8.05369
AA	AA2	FOR	4	2	204	19.6177	5.91006	17.1163
AA	AA2	FOR	3	3	198	17.4118	1.47007	3.05248
AA	AA2	FOR	4	3	262	25.0962	4.56436	3.99767
AA	AA3	CON	4	2	139	10.4581	3.38785	2.01439
AA	AA3	FOR	2	1	228	21.1985	5.88119
AA	AA4	CON	2	1	78	14.0639	0.853448	0.701546
AA	AA4	FOR	5	2	183	16.6519	5.62889	5.25641
AA	AA5	CON	6	3	144	12.7714	2.7451	2.63158
AA	AA5	CON	4	3	233	18.1372	4.13423	3.54577
AA	AA5	CON	5	3	134	10.8531
AA	AA5	CON	1	3	148	9.55082	1.58983	3.4282
AA	AA5	CON	3	3	154	15.1389	2.8013	4.02532
AA	AA5	FOR	6	2	173	19.5404	4.93007
AA	AA5	FOR	1	3	225	24.7654	6.75234	8.31776
AA	AA5	FOR	4	1	202	24.0238	7.03257	10.6342
AA	AA5	FOR	3	2	214	20.9908	10.9501	10.245
AA	AA5	FOR	2	3	333	32.415	6.88889	5.09749
AA	AA5	FOR	1	1	254	23.6003	10.4746	10.4054
LIM	LIM1	CON	1	2	205	19.2697	4.86284
LIM	LIM1	CON	2	3	211	22.7794	2.25971	3.74109
LIM	LIM1	CON	5	1	157	15.3952	2.83988	3.22314
LIM	LIM1	CON	4	1	95	10.1096	2.00656
LIM	LIM1	CON	6	1	107	11.6914	1.8227	1.42447
LIM	LIM1	CON	3	3	108	14.4562	3.03178	1.57831
LIM	LIM1	FOR	3	2	178	24.0798	8.65248
LIM	LIM1	FOR	6	2	172	21.3975	6.42527	7.42574
LIM	LIM1	FOR	1	1	216	25.6467	10.3048	7.20539
LIM	LIM1	FOR	1	2	212	23.8829	5.88618	5.03782
LIM	LIM1	FOR	1	3	209	24.1714	5.192	4.16887
LIM	LIM1	FOR	3	1	186	16.3747	7.53298	6.78201
LIM	LIM1	FOR	2	1	189	25.3794	14.0431
LIM	LIM2	CON	2	2	126	13.1997	2.25309	2.94038
LIM	LIM2	CON	1	1	92	14.2702	1.99546	1.1954
LIM	LIM2	CON	3	1	100	9.28974	1.38406	2.02654
LIM	LIM2	CON	6	3	86	9.841	2.81615
LIM	LIM2	FOR	4	3	218	26.1386	3.38393	5.01401
LIM	LIM2	FOR	6	3	193	21.9331	2.2359	2.18401
LIM	LIM2	FOR	5	1	156	14.4258	7.27382	7.93651
LIM	LIM2	FOR	2	2	191	18.2828	9.29039	5.30576
LIM	LIM2	FOR	6	1	191	22.1229	8.47127
LIM	LIM3	CON	4	2	146	12.0826	1.96035
LIM	LIM3	CON	6	2	131	10.871	4.19355	0.963719
LIM	LIM3	CON	1	3	123	14.7252	3.63314	1.32143
LIM	LIM3	FOR	4	2	182	21.0288	3.5456	7.81843
LIM	LIM3	FOR	3	3	159	19.8288	4.93455	2.13318
LIM	LIM3	FOR	4	1	201	20.0603	7.19132
LIM	LIM4	CON	5	2	115	9.4456	4.80952	6.72769
LIM	LIM4	CON	3	2	160	15.3438	2.82839
LIM	LIM4	CON	4	3	216	20.1301	4.91404	3.90501
LIM	LIM4	FOR	2	3	266	30.372	8.15657	9.37943
LIM	LIM4	FOR	5	2	152	19.3727	4.19226
