# Supplementary material
Source: publisher figshare collection journal article supplement (https://plos.figshare.com/articles/dataset/_/2585503)
Supplement: Supplementary file 1 [file 1 › S1 Table.pdf]

1 **Table S1. Means and variability of methane emissions and archaea:bacteria ratios for Aberdeen Angus- or Limousin-sired cattle offered**  
2 **either forage- or concentrate-based diets.**

| Trait                                            | Breed type           | Forage based diet |       |        |               | Concentrate based diet |       |        |              |
|--------------------------------------------------|----------------------|-------------------|-------|--------|---------------|------------------------|-------|--------|--------------|
|                                                  |                      | No                | Mean  | CV (%) | Range         | No                     | Mean  | CV (%) | Range        |
| Methane, g/day                                   | Aberdeen Angus sired | 17                | 218.2 | 17.6   | 172 - 333     | 18                     | 149.6 | 25.1   | 78 - 233     |
|                                                  | Limousin sired       | 17                | 192.4 | 14.4   | 152 - 266     | 16                     | 136.1 | 31.5   | 86 - 216     |
| Methane, g/kg DMI                                | Aberdeen Angus sired | 17                | 21.38 | 19.4   | 15.90 - 31.41 | 18                     | 13.42 | 23.8   | 7.63 - 18.14 |
|                                                  | Limousin sired       | 17                | 22.03 | 17.7   | 14.43 - 30.37 | 16                     | 13.93 | 28.8   | 9.29 - 22.78 |
| Archaea:Bacteria ratio<br>in live animals        | Aberdeen Angus sired | 13                | 7.73  | 50.1   | 3.05 – 17.11  | 14                     | 3.33  | 64.5   | 0.70 - 8.47  |
|                                                  | Limousin sired       | 12                | 5.87  | 39.0   | 2.13 – 9.38   | 11                     | 2.64  | 65.1   | 0.96 - 6.73  |
| Archaea:Bacteria ratio<br>in slaughtered animals | Aberdeen Angus sired | 17                | 6.37  | 35.4   | 1.47 – 10.95  | 17                     | 2.75  | 50.2   | 0.85 - 5.77  |
|                                                  | Limousin sired       | 17                | 6.87  | 42.6   | 2.23 – 14.0   | 16                     | 2.97  | 39.3   | 1.38 - 4.91  |

3 DMI = dry matter intake; CV = Coefficient of variation.
