# Supplementary material
Source: publisher figshare collection journal article supplement (https://plos.figshare.com/articles/dataset/_/2585503)
Supplement: Supplementary file 1 [file 1 › S2 Dataset.xlsx]

## Sheet: S2_Dataset
Dataset S2.	Metagenomic data for the analysis of the associations between relative abundances of microbial genes with methane emissions and feed conversion efficiency
	Animal code	2019N0001	2019N0002	2019N0003	2019N0004	2019N0005	2019N0006	2019N0007	2019N0008
	Breed	AA	AA	LIM	LIM	AA	AA	LIM	LIM
	Diet	CON	CON	CON	CON	FOR	FOR	FOR	FOR
	Methane emissions group	LOW	HIGH	LOW	HIGH	LOW	HIGH	LOW	HIGH
	Methane (kg/DMI)	7.6346	18.1372	9.2897	20.1301	17.4118	32.415	19.3727	30.372
	FCR (kg intake/kg gain)	6.1019	6.0958	9.3274	8.039	10.381	6.7193	8.0651	8.1183
KEGG Orthologue	Description of microbial gene	Relative abundance of microbial genes (percentage)
K01980	23S ribosomal RNA	11.7965	17.5476	16.5581	7.07038	9.90409	10.3305	11.3424	12.8441
K01977	16S ribosomal RNA	7.43365	11.2181	10.475	4.55545	6.22378	6.54785	7.12048	8.05672
K03046	DNA-directed RNA polymerase subunit beta' [EC:2.7.7.6]	1.27937	1.84396	1.29153	0.915983	1.44446	1.37008	1.47186	1.27423
K02355	elongation factor EF-G [EC:3.6.5.3]	1.18214	1.21577	1.09615	0.898529	1.33457	1.04081	1.43944	0.844815
K03043	DNA-directed RNA polymerase subunit beta [EC:2.7.7.6]	1.13288	1.56828	1.16556	0.877494	1.35192	1.20935	1.36156	1.15778
K02358	elongation factor EF-Tu [EC:3.6.5.3]	1.07325	1.68131	1.25767	0.839751	1.17764	1.19149	1.26524	1.30996
K03737	putative pyruvate-flavodoxin oxidoreductase [EC:1.2.7.-]	0.986876	1.70963	0.790409	0.886892	1.31878	1.31065	1.77599	1.19803
K01610	phosphoenolpyruvate carboxykinase (ATP) [EC:4.1.1.49]	0.819317	1.1677	0.702986	0.674307	0.866424	0.757305	1.06534	0.7867
K01006	pyruvate,orthophosphate dikinase [EC:2.7.9.1]	0.81316	1.17451	0.801337	0.610606	0.969745	0.985877	1.24807	0.807278
K04043	molecular chaperone DnaK	0.681414	1.07617	0.705388	0.64089	0.858452	0.842701	0.981385	0.9321
K01952	phosphoribosylformylglycinamidine synthase [EC:6.3.5.3]	0.633772	0.537538	0.427148	0.43636	0.671193	0.591316	0.794815	0.506301
K00262	glutamate dehydrogenase (NADP+) [EC:1.4.1.4]	0.6012	0.623359	0.396045	0.596732	0.664785	0.575708	0.775187	0.621174
K01847	methylmalonyl-CoA mutase [EC:5.4.99.2]	0.571221	0.738154	0.261308	0.538849	0.842821	0.581711	0.970824	0.423086
K00134	glyceraldehyde 3-phosphate dehydrogenase [EC:1.2.1.12]	0.534274	0.741666	0.386799	0.566	0.637899	0.522129	0.659661	0.455874
K00239	succinate dehydrogenase flavoprotein subunit [EC:1.3.99.1]	0.529575	0.780736	0.259747	0.493497	0.660564	0.663205	0.954397	0.492959
K02945	small subunit ribosomal protein S1	0.495707	0.498687	0.378753	0.426663	0.419535	0.386607	0.596938	0.329469
K12257	SecD/SecF fusion protein	0.488252	0.37226	0.104235	0.457395	0.383115	0.409569	0.643874	0.245349
K00962	polyribonucleotide nucleotidyltransferase [EC:2.7.7.8]	0.476099	0.493639	0.306821	0.421591	0.50066	0.401015	0.598431	0.303916
K03040	DNA-directed RNA polymerase subunit alpha [EC:2.7.7.6]	0.456977	0.362382	0.290009	0.476341	0.314182	0.274497	0.410368	0.227259
K01880	glycyl-tRNA synthetase [EC:6.1.1.14]	0.449523	0.530953	0.283284	0.420099	0.595071	0.471102	0.608565	0.449995
K03070	preprotein translocase subunit SecA	0.444985	0.499785	0.429549	0.326114	0.390305	0.515976	0.50328	0.484367
K04077	chaperonin GroEL	0.437045	0.517344	0.423785	0.275392	0.360606	0.480407	0.549895	0.421955
K02886	large subunit ribosomal protein L2	0.42003	0.528099	0.364222	0.446057	0.427663	0.416623	0.543922	0.435523
K01955	carbamoyl-phosphate synthase large subunit [EC:6.3.5.5]	0.41371	0.368967	0.488992	0.355205	0.416252	0.588465	0.481092	0.61326
K01874	methionyl-tRNA synthetase [EC:6.1.1.10]	0.404311	0.24649	0.240293	0.346254	0.334034	0.35539	0.504133	0.272032
K02470	DNA gyrase subunit B [EC:5.99.1.3]	0.403663	0.372699	0.371788	0.257639	0.352166	0.344885	0.370259	0.294645
K00265	glutamate synthase (NADPH/NADH) large chain [EC:1.4.1.13 1.4.1.14]	0.398153	0.32902	0.358818	0.218553	0.477369	0.385856	0.665635	0.269997
K00656	formate C-acetyltransferase [EC:2.3.1.54]	0.395561	0.151011	0.441678	0.125463	0.674476	0.144677	0.101339	0.0981396
K00527	ribonucleoside-triphosphate reductase [EC:1.17.4.2]	0.392806	0.67933	0.318229	0.424873	0.355917	0.562201	0.536348	0.762504
K02519	translation initiation factor IF-2	0.390213	0.386307	0.283044	0.285387	0.491594	0.381204	0.471918	0.305273
K01834	phosphoglycerate mutase [EC:5.4.2.1]	0.388917	0.242978	0.23561	0.331335	0.271353	0.327625	0.486852	0.245123
K01915	glutamine synthetase [EC:6.3.1.2]	0.386648	0.283585	0.322552	0.270767	0.608044	0.413321	0.334204	0.406805
K00927	phosphoglycerate kinase [EC:2.7.2.3]	0.384055	0.418792	0.257345	0.347745	0.480027	0.35569	0.544668	0.286504
K00615	transketolase [EC:2.2.1.1]	0.376601	0.245832	0.316908	0.254655	0.461739	0.416173	0.598325	0.29668
K01868	threonyl-tRNA synthetase [EC:6.1.1.3]	0.375953	0.404964	0.272716	0.345209	0.388742	0.417073	0.585844	0.362257
K01870	isoleucyl-tRNA synthetase [EC:6.1.1.5]	0.369633	0.270854	0.295053	0.368482	0.313557	0.404466	0.449517	0.396177
K01869	leucyl-tRNA synthetase [EC:6.1.1.4]	0.358289	0.294779	0.276439	0.306422	0.40875	0.404316	0.39042	0.362257
K02337	DNA polymerase III subunit alpha [EC:2.7.7.7]	0.354076	0.187447	0.244856	0.200651	0.262756	0.216716	0.266361	0.161682
K07133		0.334468	0.122257	0.203667	0.286133	0.13849	0.128018	0.188917	0.0820845
K01873	valyl-tRNA synthetase [EC:6.1.1.9]	0.334306	0.287316	0.349572	0.273154	0.327312	0.328676	0.358419	0.350725
K02112	F-type H+-transporting ATPase subunit beta [EC:3.6.3.14]	0.331713	0.402111	0.421744	0.209602	0.293862	0.326875	0.353725	0.325625
K01872	alanyl-tRNA synthetase [EC:6.1.1.7]	0.331551	0.290608	0.312225	0.191998	0.444232	0.2808	0.277028	0.259143
K13993	HSP20 family protein	0.327824	0.428011	0.084661	0.814688	0.182257	0.210563	0.427862	0.144948
K05349	beta-glucosidase [EC:3.2.1.21]	0.325718	0.073969	0.0972701	0.182152	0.0586161	0.182798	0.230945	0.114873
K00174	2-oxoglutarate ferredoxin oxidoreductase subunit alpha [EC:1.2.7.3]	0.323287	0.251539	0.126451	0.294935	0.354354	0.26249	0.414102	0.187686
K02906	large subunit ribosomal protein L3	0.311781	0.327483	0.207509	0.455605	0.17366	0.272396	0.296656	0.299394
K01840	phosphomannomutase [EC:5.4.2.8]	0.311457	0.18613	0.135938	0.236157	0.226024	0.202909	0.332177	0.133642
K06889		0.310161	0.262513	0.380674	0.188866	0.195074	0.231874	0.206411	0.184973
K01624	fructose-bisphosphate aldolase, class II [EC:4.1.2.13]	0.309513	0.231784	0.221199	0.298067	0.281826	0.238027	0.326844	0.20736
K01676	fumarate hydratase, class I [EC:4.2.1.2]	0.301086	0.338677	0.123809	0.207961	0.381239	0.265642	0.330257	0.16643
K02863	large subunit ribosomal protein L1	0.29898	0.347018	0.206429	0.437404	0.290267	0.289055	0.382313	0.282208
K00895	pyrophosphate--fructose-6-phosphate 1-phosphotransferase [EC:2.7.1.90]	0.298818	0.187666	0.0827396	0.327755	0.475494	0.271195	0.515654	0.17932
K04567	lysyl-tRNA synthetase, class II [EC:6.1.1.6]	0.296873	0.234418	0.198623	0.231234	0.30621	0.266993	0.398207	0.174571
K02469	DNA gyrase subunit A [EC:5.99.1.3]	0.291201	0.279414	0.257345	0.188866	0.352166	0.314418	0.368446	0.224771
K02952	small subunit ribosomal protein S13	0.290391	0.286218	0.205108	0.521394	0.2465	0.180096	0.237666	0.224771
K03695	ATP-dependent Clp protease ATP-binding subunit ClpB	0.281154	0.518003	0.386558	0.144111	0.260568	0.364245	0.31191	0.426704
K02950	small subunit ribosomal protein S12	0.270297	0.266245	0.205348	0.432929	0.283077	0.209962	0.245346	0.251455
K01876	aspartyl-tRNA synthetase [EC:6.1.1.12]	0.26738	0.302241	0.198383	0.238991	0.213363	0.314718	0.302629	0.330147
K06207	GTP-binding protein	0.26657	0.17318	0.282564	0.169472	0.188822	0.194354	0.182516	0.168918
K02111	F-type H+-transporting ATPase subunit alpha [EC:3.6.3.14]	0.261384	0.411988	0.270075	0.212138	0.319809	0.332128	0.459544	0.293288
K00341	NADH dehydrogenase I subunit L [EC:1.6.5.3]	0.258467	0.20786	0.0565607	0.170964	0.201796	0.247332	0.271374	0.126632
K00024	malate dehydrogenase [EC:1.1.1.37]	0.25231	0.0697987	0.0997919	0.0792161	0.395307	0.089748	0.0745639	0.0563059
K00266	glutamate synthase (NADPH/NADH) small chain [EC:1.4.1.13 1.4.1.14]	0.251337	0.189203	0.186855	0.180959	0.287141	0.286653	0.421462	0.191078
K02003		0.250689	0.181081	0.161276	0.215122	0.117076	0.137624	0.205131	0.101079
K03086	RNA polymerase primary sigma factor	0.244531	0.298291	0.469298	0.138442	0.194918	0.195104	0.134834	0.263213
K01803	triosephosphate isomerase (TIM) [EC:5.3.1.1]	0.244045	0.220151	0.126571	0.181406	0.21305	0.210112	0.294309	0.178189
K01893	asparaginyl-tRNA synthetase [EC:6.1.1.22]	0.242587	0.286218	0.229245	0.16425	0.2787	0.16854	0.247586	0.151054
K01153	type I restriction enzyme, R subunit [EC:3.1.21.3]	0.241614	0.14289	0.258426	0.101892	0.0547084	0.063484	0.0304016	0.0526879
K01740	O-acetylhomoserine (thiol)-lyase [EC:2.5.1.49]	0.235619	0.109088	0.174486	0.159924	0.23212	0.257538	0.156061	0.21437
K03522	electron transfer flavoprotein alpha subunit	0.235294	0.241442	0.133056	0.207663	0.32403	0.24328	0.328017	0.166656
K01887	arginyl-tRNA synthetase [EC:6.1.1.19]	0.233998	0.109307	0.176407	0.133071	0.220865	0.18775	0.208118	0.134546
K02357	elongation factor EF-Ts	0.231729	0.236833	0.0835802	0.211989	0.336535	0.20621	0.344231	0.153993
K02967	small subunit ribosomal protein S2	0.229461	0.280073	0.184693	0.29941	0.239935	0.253636	0.283001	0.292836
K00831	phosphoserine aminotransferase [EC:2.6.1.52]	0.227516	0.196665	0.102914	0.254804	0.2948	0.220768	0.280761	0.148114
K01881	prolyl-tRNA synthetase [EC:6.1.1.15]	0.222817	0.209177	0.171964	0.168278	0.26557	0.216716	0.255053	0.180224
K03701	excinuclease ABC subunit A	0.220224	0.300266	0.356777	0.164847	0.221803	0.310666	0.227212	0.333539
K01960	pyruvate carboxylase subunit B [EC:6.4.1.1]	0.220224	0.0888945	0.0435914	0.196772	0.163031	0.213564	0.228172	0.198314
K03521	electron transfer flavoprotein beta subunit	0.216821	0.256806	0.106397	0.221686	0.308868	0.24283	0.363859	0.166204
K00351	Na+-transporting NADH:ubiquinone oxidoreductase subunit F [EC:1.6.5.-]	0.216821	0.259001	0.140861	0.15709	0.263851	0.177995	0.304869	0.118491
K02931	large subunit ribosomal protein L5	0.216011	0.243417	0.149388	0.274049	0.1796	0.197806	0.233506	0.21143
K09858	SEC-C motif domain protein	0.213094	0.0502638	0.00240173	3.74956	0.0203202	0.287104	0.1183	0.0323363
K02982	small subunit ribosomal protein S3	0.211797	0.261416	0.136658	0.23735	0.215082	0.238177	0.292389	0.230425
K03076	preprotein translocase subunit SecY	0.211797	0.160449	0.0993115	0.251672	0.173816	0.20591	0.279481	0.180676
K01804	L-arabinose isomerase [EC:5.3.1.4]	0.209691	0.125769	0.0941478	0.150078	0.157404	0.204259	0.251	0.139973
K14233	tRNA Ser	0.207908	0.215981	0.172324	0.254804	0.188353	0.157734	0.18177	0.190626
K00600	glycine hydroxymethyltransferase [EC:2.1.2.1]	0.207098	0.182618	0.119606	0.193789	0.217427	0.247933	0.329831	0.207133
K03798	cell division protease FtsH [EC:3.4.24.-]	0.205964	0.309046	0.419822	0.116363	0.181475	0.214765	0.188277	0.248289
K00688	starch phosphorylase [EC:2.4.1.1]	0.20564	0.266684	0.281603	0.202441	0.336222	0.258738	0.305403	0.210073
K00053	ketol-acid reductoisomerase [EC:1.1.1.86]	0.205316	0.193373	0.188055	0.207215	0.19398	0.236226	0.253453	0.259821
K02335	DNA polymerase I [EC:2.7.7.7]	0.203371	0.0564096	0.108078	0.158134	0.0926916	0.117063	0.0580297	0.0728133
K00925	acetate kinase [EC:2.7.2.1]	0.203047	0.09087	0.136418	0.103384	0.214926	0.116612	0.13622	0.0755268
K01933	phosphoribosylformylglycinamidine cyclo-ligase [EC:6.3.3.1]	0.202885	0.0950403	0.0767353	3.50744	0.153183	0.265192	0.159902	0.108994
K03596	GTP-binding protein LepA	0.197375	0.32002	0.255064	0.133817	0.207267	0.225271	0.172382	0.246254
K01810	glucose-6-phosphate isomerase [EC:5.3.1.9]	0.196727	0.128842	0.252302	0.0930901	0.211174	0.180397	0.208011	0.131607
K03308	neurotransmitter:Na+ symporter, NSS family	0.195917	0.0177789	0.0957089	0.0951787	0.0481434	0.0567304	0.026028	0.0497482
K00175	2-oxoglutarate ferredoxin oxidoreductase subunit beta [EC:1.2.7.3]	0.195106	0.150353	0.0912657	0.172306	0.1796	0.165689	0.240546	0.138617
K00240	succinate dehydrogenase iron-sulfur protein [EC:1.3.99.1]	0.192514	0.247368	0.073613	0.170665	0.20883	0.197506	0.312656	0.127536
K00602	phosphoribosylaminoimidazolecarboxamide formyltransferase / IMP cyclohydrolase [EC:2.1.2.3 3.5.4.10]	0.191541	0.0974548	0.100753	0.1095	0.102695	0.114211	0.128753	0.0791449
K02946	small subunit ribosomal protein S10	0.190569	0.133891	0.113121	0.388174	0.265414	0.153232	0.204704	0.133642
K04079	molecular chaperone HtpG	0.188625	0.0880166	0.119486	0.139038	0.153965	0.176494	0.123313	0.125727
K01883	cysteinyl-tRNA synthetase [EC:6.1.1.16]	0.187814	0.130598	0.106637	0.119794	0.145368	0.172292	0.146994	0.139069
K00951	GTP pyrophosphokinase [EC:2.7.6.5]	0.183115	0.0849437	0.153471	0.0948803	0.118326	0.118563	0.100379	0.0979135
K06950	uncharacterized protein	0.175823	0.143987	0.128132	0.150078	0.184758	0.147229	0.201931	0.125727
K09458	3-oxoacyl-[acyl-carrier-protein] synthase II [EC:2.3.1.179]	0.173716	0.0888945	0.077696	0.109799	0.383271	0.183698	0.171422	0.101079
K01875	seryl-tRNA synthetase [EC:6.1.1.11]	0.173554	0.0941624	0.147106	0.119645	0.144586	0.153682	0.155635	0.13319
K01985	5S ribosomal RNA	0.173554	0.163083	0.147947	0.283298	0.172878	0.153232	0.153715	0.163038
K02867	large subunit ribosomal protein L11	0.173554	0.178667	0.110239	0.277629	0.167408	0.161486	0.203104	0.167787
K01710	dTDP-glucose 4,6-dehydratase [EC:4.2.1.46]	0.170475	0.167034	0.0662878	0.231681	0.186634	0.201558	0.188597	0.195601
K02959	small subunit ribosomal protein S16	0.170151	0.114356	0.0593227	0.180362	0.196794	0.134022	0.256653	0.0972351
K00290	saccharopine dehydrogenase (NAD+, L-lysine forming) [EC:1.5.1.7]	0.170151	0.128842	0.146866	0.0708619	0.2948	0.135523	0.169609	0.0940693
K01811	putative family 31 glucosidase	0.169017	0.0539952	0.0345849	0.106367	0.0295425	0.127568	0.121073	0.0743962
K00058	D-3-phosphoglycerate dehydrogenase [EC:1.1.1.95]	0.167396	0.145524	0.121167	0.141724	0.186321	0.210262	0.265081	0.196053
K14228	tRNA Leu	0.163993	0.1903	0.12525	0.209602	0.163969	0.115712	0.153928	0.153089
K02014	iron complex outermembrane recepter protein	0.163507	0.0392892	0.0407093	0.143812	0.0533016	0.106707	0.0801109	0.0542708
K03427	type I restriction enzyme M protein [EC:2.1.1.72]	0.163021	0.0783589	0.147466	0.0778735	0.0447045	0.0399214	0.0236812	0.035276
K01190	beta-galactosidase [EC:3.2.1.23]	0.163021	0.0471909	0.0945081	0.0947312	0.146931	0.142426	0.095045	0.0753007
K02935	large subunit ribosomal protein L7/L12	0.162373	0.133452	0.128252	0.15336	0.149745	0.11211	0.135367	0.108315
K02986	small subunit ribosomal protein S4	0.161887	0.179984	0.101353	0.189313	0.134895	0.157134	0.18849	0.169596
K01889	phenylalanyl-tRNA synthetase alpha chain [EC:6.1.1.20]	0.161724	0.0823098	0.0792571	0.157537	0.0855013	0.120815	0.161502	0.113064
K02994	small subunit ribosomal protein S8	0.161076	0.185032	0.135217	0.284641	0.158654	0.161937	0.188277	0.187686
K02004		0.160914	0.0768224	0.243656	0.110843	0.160217	0.133872	0.124273	0.0961045
K02837	peptide chain release factor RF-3	0.160752	0.127086	0.15323	0.0881671	0.171003	0.132521	0.132807	0.0990442
K02933	large subunit ribosomal protein L6	0.160752	0.137183	0.102194	0.202292	0.190229	0.137023	0.190623	0.139747
K01756	adenylosuccinate lyase [EC:4.3.2.2]	0.159618	0.0862606	0.158754	0.108456	0.139897	0.156084	0.116379	0.168466
K02878	large subunit ribosomal protein L16	0.157673	0.178228	0.137139	0.127253	0.132394	0.123216	0.167155	0.120979
K02884	large subunit ribosomal protein L19	0.155891	0.123794	0.0764951	0.250329	0.108323	0.101604	0.215905	0.0827629
K02005	HlyD family secretion protein	0.155243	0.0722131	0.056921	0.11129	0.0522074	0.0754904	0.0884313	0.0413815
K01885	glutamyl-tRNA synthetase [EC:6.1.1.17]	0.152974	0.060141	0.0841806	0.0659389	0.193824	0.114962	0.076804	0.105828
K01425	glutaminase [EC:3.5.1.2]	0.152002	0.170765	0.0255784	0.222581	0.2787	0.0947007	0.236492	0.0936171
K01897	long-chain acyl-CoA synthetase [EC:6.2.1.3]	0.151191	0.0201933	0.0534385	0.0771276	0.0573656	0.0592817	0.0340284	0.0287183
K03106	signal recognition particle subunit SRP54	0.151029	0.110185	0.0977504	0.130684	0.114575	0.150831	0.177289	0.141556
K06942		0.150705	0.112819	0.110119	0.12964	0.12833	0.121565	0.131954	0.11216
K02356	elongation factor EF-P	0.150057	0.0548732	0.0628052	0.159327	0.135364	0.108058	0.128753	0.0743962
K03561	biopolymer transport protein ExbB	0.149571	0.178667	0.0283404	0.264501	0.249157	0.203209	0.293455	0.146757
K01912	phenylacetate-CoA ligase [EC:6.2.1.30]	0.149085	0.129281	0.0240173	0.126805	0.204766	0.165388	0.205237	0.170048
K02909	large subunit ribosomal protein L31	0.149085	0.0932844	0.06941	0.220492	0.0922227	0.0810434	0.129607	0.0712304
K00789	S-adenosylmethionine synthetase [EC:2.5.1.6]	0.148274	0.159132	0.181211	0.078321	0.10801	0.163137	0.112326	0.15942
K02992	small subunit ribosomal protein S7	0.147302	0.133452	0.100873	0.202441	0.141616	0.155333	0.162568	0.15942
K00040	fructuronate reductase [EC:1.1.1.57]	0.14714	0.0544342	0.0247378	0.0581813	0.0620549	0.0621332	0.108059	0.0407031
K02224	cobyrinic acid a,c-diamide synthase [EC:6.3.5.9 6.3.1.-]	0.146654	0.0199738	0.0296614	2.98291	0.00797179	0.104006	0.0608032	0.0214822
K09014	Fe-S cluster assembly protein SufB	0.144709	0.15123	0.108198	0.0901065	0.229931	0.137173	0.12214	0.0958784
K02876	large subunit ribosomal protein L15	0.144223	0.135646	0.0951085	0.159626	0.150839	0.11256	0.166622	0.113516
K14234	tRNA Thr	0.142765	0.163742	0.116124	0.164549	0.129112	0.103105	0.122886	0.123014
K02988	small subunit ribosomal protein S5	0.140982	0.18174	0.0829798	0.188269	0.172722	0.173793	0.216865	0.20736
K02871	large subunit ribosomal protein L13	0.140496	0.101186	0.0535586	0.207513	0.0600229	0.128919	0.163635	0.139069
K01940	argininosuccinate synthase [EC:6.3.4.5]	0.140334	0.151011	0.0994316	0.175439	0.14318	0.179196	0.19745	0.185877
K01338	ATP-dependent Lon protease [EC:3.4.21.53]	0.139524	0.0667258	0.15335	0.0765308	0.094411	0.114962	0.0542962	0.0913558
K02600	N utilization substance protein A	0.139038	0.0834072	0.0745737	0.0880179	0.210549	0.0957512	0.106139	0.0814062
K01890	phenylalanyl-tRNA synthetase beta chain [EC:6.1.1.20]	0.138552	0.0465325	0.087423	0.110097	0.104884	0.133571	0.0951516	0.112386
K01686	mannonate dehydratase [EC:4.2.1.8]	0.138227	0.0625554	0.0369866	0.0719062	0.165688	0.0907986	0.187636	0.0639943
K09013	Fe-S cluster assembly ATP-binding protein	0.137255	0.0777004	0.0812986	0.12412	0.0831567	0.0980024	0.147208	0.0972351
K03569	rod shape-determining protein MreB and related proteins	0.136931	0.123135	0.0761348	0.139635	0.16944	0.144527	0.168755	0.155802
K14225	tRNA Gly	0.134662	0.194471	0.144224	0.155747	0.138959	0.108058	0.145181	0.142235
K00666	fatty-acyl-CoA synthase [EC:6.2.1.-]	0.134338	0.151889	0.0383076	0.112931	0.120358	0.132071	0.183583	0.0954261
K01939	adenylosuccinate synthase [EC:6.3.4.4]	0.133042	0.0809928	0.133536	0.110246	0.140366	0.115412	0.138567	0.097009
K03545	trigger factor	0.133042	0.0171204	0.0587223	0.0590764	0.120046	0.0624334	0.0675235	0.0382157
K02963	small subunit ribosomal protein S18	0.13288	0.138939	0.117685	0.126507	0.116294	0.0849454	0.122886	0.08118
K01687	dihydroxy-acid dehydratase [EC:4.2.1.9]	0.132718	0.0906505	0.22216	0.0610158	0.135364	0.137774	0.088538	0.116004
K03088	RNA polymerase sigma-70 factor, ECF subfamily	0.132394	0.0283146	0.0313426	0.137547	0.0553336	0.107307	0.103152	0.0658033
K02879	large subunit ribosomal protein L17	0.131745	0.0575071	0.067969	0.132027	0.0539268	0.0738395	0.118833	0.0685168
K07405	alpha-amylase [EC:3.2.1.1]	0.131583	0.100308	0.033384	0.146647	0.0837819	0.101754	0.153501	0.0682907
K00088	IMP dehydrogenase [EC:1.1.1.205]	0.131583	0.154742	0.148187	0.0983115	0.134583	0.158485	0.12182	0.181355
K00826	branched-chain amino acid aminotransferase [EC:2.6.1.42]	0.130125	0.0842852	0.074934	0.105323	0.123954	0.146328	0.149128	0.131833
K02990	small subunit ribosomal protein S6	0.128991	0.0956988	0.070731	0.26838	0.148807	0.0957512	0.149768	0.0800494
K02965	small subunit ribosomal protein S19	0.128829	0.110844	0.140501	0.129491	0.108635	0.0956011	0.110832	0.109446
K07085	putative transport protein	0.128342	0.0089992	0.0171724	0.066834	0.0690888	0.0513275	0.0172809	0.0232912
K03502	DNA polymerase V	0.12737	0.104698	0.112761	0.279121	0.0625238	0.171692	0.123633	0.0888684
K01738	cysteine synthase A [EC:2.5.1.47]	0.12656	0.0687012	0.114683	0.113976	0.126611	0.121565	0.0988852	0.109672
K00012	UDPglucose 6-dehydrogenase [EC:1.1.1.22]	0.126398	0.0858216	0.0760148	0.0968197	0.0991003	0.106557	0.0650701	0.0906774
K00342	NADH dehydrogenase I subunit M [EC:1.6.5.3]	0.125426	0.0741885	0.0318229	0.0765308	0.0908159	0.125017	0.0931249	0.0662556
K01649	2-isopropylmalate synthase [EC:2.3.3.13]	0.124615	0.0886751	0.0995517	0.106964	0.162249	0.136573	0.136967	0.0947477
K01867	tryptophanyl-tRNA synthetase [EC:6.1.1.2]	0.123805	0.0485079	0.0576415	0.0989083	0.0675257	0.0904984	0.107952	0.0673862
K00700	1,4-alpha-glucan branching enzyme [EC:2.4.1.18]	0.123643	0.0948209	0.15275	0.080708	0.0962867	0.122916	0.112113	0.08819
K02887	large subunit ribosomal protein L20	0.122833	0.0787979	0.0845409	0.166637	0.074716	0.0867464	0.13494	0.0700997
K01923	phosphoribosylaminoimidazole-succinocarboxamide synthase [EC:6.3.2.6]	0.122833	0.073969	0.108558	0.10398	0.170221	0.110759	0.0988852	0.0967829
K01507	inorganic pyrophosphatase [EC:3.6.1.1]	0.119268	0.170765	0.136779	0.0971181	0.115044	0.16809	0.139101	0.161682
K01937	CTP synthase [EC:6.3.4.2]	0.118133	0.154962	0.15263	0.106666	0.118795	0.128919	0.0989918	0.158516
K00133	aspartate-semialdehyde dehydrogenase [EC:1.2.1.11]	0.117323	0.0853827	0.0814187	0.103533	0.103633	0.128769	0.134514	0.135903
K00764	amidophosphoribosyltransferase [EC:2.4.2.14]	0.116999	0.0471909	0.0714515	0.0683258	0.0869081	0.0987528	0.0618699	0.0854765
K03979	GTP-binding protein	0.116351	0.0206323	0.0441918	0.0438598	0.03939	0.0327175	0.0137607	0.024648
K02961	small subunit ribosomal protein S17	0.115865	0.159791	0.0685694	0.247047	0.120046	0.118263	0.147848	0.130928
K00059	3-oxoacyl-[acyl-carrier protein] reductase [EC:1.1.1.100]	0.115054	0.058824	0.0834601	0.0942836	0.111136	0.120364	0.157875	0.0719088
K03555	DNA mismatch repair protein MutS	0.114568	0.0377527	0.0931871	0.0705635	0.0828441	0.0871967	0.057283	0.0578888
K00041	tagaturonate reductase [EC:1.1.1.58]	0.114568	0.139817	0.0230566	0.146796	0.0837819	0.0894479	0.19073	0.0739439
K04759	ferrous iron transport protein B	0.114244	0.124452	0.220119	0.121882	0.180225	0.196755	0.137501	0.198088
K01265	methionyl aminopeptidase [EC:3.4.11.18]	0.112948	0.0232662	0.0673685	0.0693701	0.0442356	0.0633339	0.070937	0.0436427
K01270	aminoacylhistidine dipeptidase [EC:3.4.13.3]	0.112624	0.0792369	0.0716916	0.0739947	0.0318872	0.0427729	0.0493892	0.0255525
K00928	aspartate kinase [EC:2.7.2.4]	0.111976	0.0586046	0.0650869	0.0753374	0.104415	0.0928997	0.0609099	0.0759791
K01951	GMP synthase (glutamine-hydrolysing) [EC:6.3.5.2]	0.111489	0.16023	0.155512	0.103085	0.136615	0.174393	0.169076	0.175023
K02621	topoisomerase IV subunit A [EC:5.99.1.-]	0.111165	0.0616775	0.034705	0.0510206	0.0945673	0.11136	0.0825643	0.0753007
K02874	large subunit ribosomal protein L14	0.110841	0.142231	0.0853815	0.141724	0.116294	0.122315	0.133767	0.132285
K03696	ATP-dependent Clp protease ATP-binding subunit ClpC	0.110679	0.132354	0.1112	0.0669831	0.12708	0.153982	0.0957917	0.140652
K05366	penicillin-binding protein 1A [EC:2.4.1.- 3.4.-.-]	0.110679	0.0107551	0.054159	0.0496779	0.0618986	0.0666357	0.0209078	0.0323363
K01785	aldose 1-epimerase [EC:5.1.3.3]	0.109059	0.0140475	0.0420303	0.0678782	0.0164125	0.0346685	0.0304016	0.0151506
K13378	NADH dehydrogenase I subunit C/D [EC:1.6.5.3]	0.108735	0.145963	0.0407093	0.116959	0.208517	0.125917	0.243746	0.0755268
K00347	Na+-transporting NADH:ubiquinone oxidoreductase subunit B [EC:1.6.5.-]	0.108735	0.0959183	0.0129693	0.102339	0.111292	0.123666	0.188703	0.0710043
K03517	quinolinate synthase [EC:2.5.1.72]	0.108573	0.0412646	0.0463534	0.156791	0.0422036	0.0715883	0.0573897	0.0499743
K02948	small subunit ribosomal protein S11	0.108248	0.127525	0.0834601	0.179169	0.107385	0.120364	0.110192	0.15128
K01886	glutaminyl-tRNA synthetase [EC:6.1.1.18]	0.108248	0.0572876	0.080578	0.0769784	0.0683073	0.104006	0.0905647	0.0852503
K09955	hypothetical protein	0.107924	0.0643114	0.0343447	0.0836916	0.0776859	0.120815	0.0876846	0.0967829
K03553	recombination protein RecA	0.107762	0.184374	0.169082	0.0531091	0.0925353	0.122916	0.100592	0.127989
K02622	topoisomerase IV subunit B [EC:5.99.1.-]	0.107276	0.0489469	0.0359059	0.080708	0.111605	0.101754	0.0886446	0.0642204
K01358	ATP-dependent Clp protease, protease subunit [EC:3.4.21.92]	0.106466	0.112819	0.0840606	0.0641487	0.145837	0.0789422	0.0604832	0.0664817
K03723	transcription-repair coupling factor (superfamily II helicase) [EC:3.6.4.-]	0.106466	0.0711156	0.162237	0.0534075	0.107854	0.110759	0.0617632	0.0913558
K03628	transcription termination factor Rho	0.106304	0.154303	0.195141	0.0631044	0.129581	0.140925	0.129607	0.144948
K03217	preprotein translocase subunit YidC	0.105818	0.0621164	0.0517573	0.107412	0.0637743	0.0948507	0.0982451	0.0544969
K07462	single-stranded-DNA-specific exonuclease [EC:3.1.-.-]	0.10517	0.0274366	0.0578817	0.080708	0.0562715	0.0717384	0.0422422	0.0341454
K08217	MFS transporter, DHA3 family, macrolide efflux protein	0.104521	0.11677	0.0344648	0.23362	0.0181319	0.0121565	0.0176009	0.0248741
K01866	tyrosyl-tRNA synthetase [EC:6.1.1.1]	0.104035	0.113258	0.114082	0.117855	0.173347	0.144527	0.165449	0.132737
K07396	putative protein-disulfide isomerase	0.104035	0.0206323	0.132335	0.0447549	0.0447045	0.00435233	0.00522694	0.00565321
K02836	peptide chain release factor RF-2	0.103549	0.059263	0.0586022	0.0814539	0.0650248	0.0763909	0.0777641	0.0594717
K03544	ATP-dependent Clp protease ATP-binding subunit ClpX	0.103549	0.19491	0.20859	0.0826473	0.111918	0.120514	0.0965384	0.164847
K02888	large subunit ribosomal protein L21	0.103387	0.0460935	0.0390281	0.131132	0.0493938	0.0532785	0.0841644	0.0402508
K00765	ATP phosphoribosyltransferase [EC:2.4.2.17]	0.103225	0.0162425	0.0190938	0.0557944	0.0362638	0.0522279	0.0657101	0.0425121
K14219	tRNA Arg	0.103225	0.0941624	0.107838	0.141575	0.0925353	0.0684366	0.077124	0.0884161
K02902	large subunit ribosomal protein L28	0.102739	0.0750665	0.0363862	0.196772	0.0862829	0.063484	0.107846	0.0429644
K01775	alanine racemase [EC:5.1.1.1]	0.102415	0.0237052	0.0480346	0.0540042	0.0489249	0.0720385	0.070297	0.0391202
K03307	solute:Na+ symporter, SSS family	0.102091	0.0612385	0.0348251	0.144857	0.0719024	0.164488	0.224332	0.132059
K00677	UDP-N-acetylglucosamine acyltransferase [EC:2.3.1.129]	0.10128	0.0241442	0.0138099	0.0723537	0.0264163	0.0474254	0.0638967	0.0296228
K12524	bifunctional aspartokinase / homoserine dehydrogenase 1 [EC:2.7.2.4 1.1.1.3]	0.101118	0.06058	0.018013	0.0751882	0.0751849	0.05613	0.0750973	0.0357283
K03977	GTP-binding protein	0.0998219	0.0285341	0.0568009	0.0602699	0.0908159	0.0585313	0.0600565	0.0447734
K01784	UDP-glucose 4-epimerase [EC:5.1.3.2]	0.0996599	0.0640919	0.0964295	0.0496779	0.119108	0.0733893	0.0532294	0.0680646
K00179	indolepyruvate ferredoxin oxidoreductase, alpha subunit [EC:1.2.7.8]	0.0996599	0.0583851	0.0177728	0.0711603	0.0633054	0.103856	0.0721104	0.08819
K02926	large subunit ribosomal protein L4	0.0994978	0.0897725	0.0564407	0.110097	0.0976935	0.072939	0.108592	0.0461302
K00874	2-dehydro-3-deoxygluconokinase [EC:2.7.1.45]	0.0993358	0.115673	0.0367465	0.108754	0.120358	0.070988	0.123953	0.0578888
K02864	large subunit ribosomal protein L10	0.0990117	0.0866996	0.0489953	0.20632	0.0758102	0.124266	0.141021	0.157159
K14218	tRNA Ala	0.0985255	0.124891	0.103034	0.124419	0.0951925	0.0825442	0.0951516	0.108994
K01990	ABC-2 type transport system ATP-binding protein	0.0983635	0.0346798	0.0543992	0.075039	0.0401716	0.0438234	0.0283748	0.0260047
K01892	histidyl-tRNA synthetase [EC:6.1.1.21]	0.0970671	0.0535562	0.0671284	0.102041	0.0830004	0.0931999	0.076484	0.0890945
K07277	outer membrane protein	0.0970671	0.0272171	0.0250981	0.0589273	0.0567404	0.0759406	0.0661368	0.0474869
K01755	argininosuccinate lyase [EC:4.3.2.1]	0.096743	0.0658478	0.0879033	0.0765308	0.0781548	0.110459	0.0750973	0.11623
K03832	periplasmic protein TonB	0.0957707	0.03029	0.00732528	0.0801112	0.0781548	0.0736894	0.0995252	0.0499743
K07444	putative N6-adenine-specific DNA methylase [EC:2.1.1.-]	0.0954466	0.0158035	0.0255784	0.0780227	0.0281357	0.046675	0.0429889	0.0332408
K02939	large subunit ribosomal protein L9	0.0951225	0.0467519	0.0462333	0.0989083	0.0611171	0.0733893	0.115846	0.0443211
K02996	small subunit ribosomal protein S9	0.0949605	0.075725	0.058362	0.140829	0.0623675	0.11151	0.104219	0.118491
K01895	acetyl-CoA synthetase [EC:6.2.1.1]	0.0946364	0.0851632	0.05548	0.0817522	0.114419	0.11226	0.136967	0.100627
K01652	acetolactate synthase I/II/III large subunit [EC:2.2.1.6]	0.0939882	0.0467519	0.117925	0.0629552	0.10801	0.11151	0.0548295	0.0764313
K00876	uridine kinase [EC:2.7.1.48]	0.0931779	0.00724326	0.056921	0.0455008	0.0132863	0.0304663	0.0248546	0.0160551
K01953	asparagine synthase (glutamine-hydrolysing) [EC:6.3.5.4]	0.0931779	0.0550927	0.135818	0.04565	0.0739344	0.0631838	0.112539	0.0481653
K08301	ribonuclease G [EC:3.1.26.-]	0.0930159	0.0133891	0.0509167	0.0777243	0.0558025	0.0741397	0.0667768	0.0407031
K14230	tRNA Met	0.0917195	0.107771	0.0843007	0.135309	0.081281	0.0781918	0.096325	0.112612
K03531	cell division protein FtsZ	0.0904231	0.0983327	0.0782964	0.104876	0.0900343	0.122916	0.124913	0.15128
K00849	galactokinase [EC:2.7.1.6]	0.0899369	0.0283146	0.0546394	0.0674307	0.0271979	0.05613	0.0858712	0.0357283
K03702	excinuclease ABC subunit B	0.0894508	0.174936	0.165239	0.0705635	0.129424	0.160886	0.0909914	0.202611
K00648	3-oxoacyl-[acyl-carrier-protein] synthase III [EC:2.3.1.180]	0.0891267	0.0177789	0.0362661	0.0428155	0.0261037	0.0316669	0.0381887	0.0196732
K03924	MoxR-like ATPase [EC:3.6.3.-]	0.0886406	0.0568486	0.0575214	0.0587781	0.098475	0.103856	0.0564296	0.0773358
K01200	pullulanase [EC:3.2.1.41]	0.0886406	0.0186569	0.00828597	0.0441581	0.015162	0.0382705	0.0662435	0.0219344
K02520	translation initiation factor IF-3	0.0886406	0.0425816	0.0354255	0.0848851	0.115825	0.0726389	0.0874712	0.0558537
K07114	uncharacterized protein	0.0884785	0.013828	0.00480346	0.0444565	0.0284483	0.0511774	0.0418155	0.0284922
K03388	heterodisulfide reductase subunit A [EC:1.8.98.1]	0.0881544	0.288852	0.0762549	0.336557	0.0948799	0.256187	0.209078	0.452935
K00278	L-aspartate oxidase [EC:1.4.3.16]	0.0876683	0.0471909	0.111921	0.0246152	0.106916	0.0529783	0.0414955	0.0298489
K01925	UDP-N-acetylmuramoylalanine--D-glutamate ligase [EC:6.3.2.9]	0.0863719	0.0355578	0.0308622	0.112186	0.0890965	0.0715883	0.0736038	0.0651249
K06178	ribosomal large subunit pseudouridine synthase B [EC:5.4.99.12]	0.0862098	0.029851	0.0169322	0.0487828	0.0679947	0.0586814	0.0592031	0.0343715
K01284	peptidyl-dipeptidase Dcp [EC:3.4.15.5]	0.0860478	0.0252417	0.0115283	0.0690717	0.0239154	0.0532785	0.103579	0.0260047
K06215	pyridoxine biosynthesis protein [EC:4.-.-.-]	0.0849134	0.0239247	0.0703707	0.029389	0.0351697	0.03737	0.0286948	0.0219344
K00399	methyl-coenzyme M reductase alpha subunit [EC:2.8.4.1]	0.0849134	0.246271	0.0684493	0.253611	0.0697141	0.235926	0.18401	0.364293
K06142	outer membrane protein	0.0847514	0.0274366	0.0162117	0.0680274	0.0775296	0.0439735	0.0662435	0.028266
K04069	pyruvate formate lyase activating enzyme [EC:1.97.1.4]	0.0845893	0.0114136	0.0678489	0.0547501	0.0354823	0.0279149	0.0160008	0.0178641
K14221	tRNA Asp	0.0841032	0.0880166	0.0738532	0.0805588	0.0675257	0.0592817	0.0782974	0.0739439
K10112	maltose/maltodextrin transport system ATP-binding protein	0.0841032	0.2421	0.149748	0.0563911	0.111292	0.122466	0.104325	0.171179
K03654	ATP-dependent DNA helicase RecQ [EC:3.6.4.12]	0.0831309	0.0285341	0.0668882	0.055496	0.159905	0.0886975	0.0561096	0.044095
K02429	MFS transporter, FHS family, L-fucose permease	0.0829689	0.0118526	0.00432311	0.0377433	0.0150057	0.0376702	0.0327484	0.0183164
K01972	DNA ligase (NAD+) [EC:6.5.1.2]	0.0828068	0.0283146	0.0617245	0.0420696	0.0637743	0.0703877	0.0386154	0.0400247
K01262	Xaa-Pro aminopeptidase [EC:3.4.11.9]	0.0824827	0.0305095	0.0744536	0.0504238	0.0631491	0.0574808	0.0605898	0.0384418
K00854	xylulokinase [EC:2.7.1.17]	0.0824827	0.0342409	0.0659275	0.112931	0.0461113	0.0733893	0.0884313	0.0456779
K03773	FKBP-type peptidyl-prolyl cis-trans isomerase FklB [EC:5.2.1.8]	0.0823207	0.0089992	0.00588424	0.0396827	0.0387648	0.0262641	0.026348	0.0119848
K14237	tRNA Val	0.0819966	0.0818708	0.0785366	0.0817522	0.0723713	0.0559799	0.0618699	0.0658033
K05592	ATP-dependent RNA helicase DeaD [EC:3.6.4.13]	0.0819966	0.0520198	0.0689297	0.0520648	0.0973809	0.0992031	0.0270947	0.0490698
K03310	alanine or glycine:cation symporter, AGCS family	0.0811863	0.0280951	0.162477	0.0265546	0.068151	0.0559799	0.0101339	0.0402508
K03284	metal ion transporter, MIT family	0.0810243	0.028973	0.0375871	0.0780227	0.0601792	0.0751902	0.0668835	0.0502005
K08289	phosphoribosylglycinamide formyltransferase 2 [EC:2.1.2.2]	0.0808622	0.029412	0.0147706	0.0434122	0.0456424	0.0622833	0.050136	0.037085
K01733	threonine synthase [EC:4.2.3.1]	0.080214	0.0673843	0.0626852	0.10219	0.0729966	0.11136	0.0842711	0.13319
K06901	putative MFS transporter, AGZA family, xanthine/uracil permease	0.0797279	0.044118	0.102194	0.087272	0.0370454	0.0522279	0.0910981	0.0922603
K09015	Fe-S cluster assembly protein SufD	0.0784315	0.016462	0.0480346	0.0446057	0.0412657	0.0535787	0.0477892	0.0323363
K07636	two-component system, OmpR family, phosphate regulon sensor histidine kinase PhoR [EC:2.7.13.3]	0.0771351	0.0184374	0.0481547	0.0635519	0.0303241	0.0352689	0.0297616	0.0232912
K03657	DNA helicase II / ATP-dependent DNA helicase PcrA [EC:3.6.4.12]	0.076649	0.0414841	0.177128	0.0358039	0.16053	0.0986028	0.0229345	0.0741701
K02970	small subunit ribosomal protein S21	0.076649	0.0320459	0.0562005	0.099505	0.0750286	0.0426228	0.069657	0.035276
K14229	tRNA Lys	0.076649	0.0976743	0.0760148	0.103235	0.104102	0.0588315	0.0731772	0.0667078
K03655	ATP-dependent DNA helicase RecG [EC:3.6.4.12]	0.0764869	0.0355578	0.156112	0.035058	0.0795616	0.0592817	0.0267747	0.0420598
K01243	S-adenosylhomocysteine/5'-methylthioadenosine nucleosidase [EC:3.2.2.9]	0.0763249	0.00417036	0.0229365	0.029389	0.0128174	0.0211613	0.0151475	0.008819
K02835	peptide chain release factor RF-1	0.0756767	0.108429	0.0877832	0.0434122	0.113324	0.0853957	0.0626166	0.0782404
K03466	DNA segregation ATPase FtsK/SpoIIIE, S-DNA-T family	0.0755146	0.044996	0.093067	0.0447549	0.0956615	0.0771413	0.0494959	0.051105
K00378	hydroxylamine reductase [EC:1.7.-.-]	0.0755146	0.0956988	0.167281	0.0152167	0.0465803	0.0327175	0.0164275	0.0296228
K14224	tRNA Glu	0.0751905	0.0643114	0.062445	0.0681766	0.0640869	0.0489262	0.0492826	0.0603762
K02314	replicative DNA helicase [EC:3.6.4.12]	0.0751905	0.0342409	0.0641262	0.0281956	0.0684636	0.0525281	0.0539762	0.0303012
K00812	aspartate aminotransferase [EC:2.6.1.1]	0.0747044	0.0125111	0.00588424	0.0449041	0.0486123	0.0477255	0.045549	0.0357283
K01572	oxaloacetate decarboxylase, beta subunit [EC:4.1.1.3]	0.0745423	0.0656283	0.048635	0.0651929	0.134114	0.102205	0.0707237	0.0685168
K00971	mannose-1-phosphate guanylyltransferase [EC:2.7.7.22]	0.0743803	0.00504833	0.00432311	0.0349088	0.0368891	0.0325674	0.0129073	0.0183164
K01278	dipeptidyl-peptidase 4 [EC:3.4.14.5]	0.0738941	0.0105357	0.0070851	0.030135	0.0175067	0.0291156	0.0258147	0.0151506
K00346	Na+-transporting NADH:ubiquinone oxidoreductase subunit A [EC:1.6.5.-]	0.07357	0.0254612	0.0100873	0.0443073	0.0465803	0.0472753	0.056643	0.0178641
K06990		0.07357	0.00373138	0.00192138	0.0341629	0.00515822	0.0138074	0.00778707	0.00949738
K00350	Na+-transporting NADH:ubiquinone oxidoreductase subunit E [EC:1.6.5.-]	0.0732459	0.0965768	0.0395085	0.0736964	0.110824	0.0814936	0.110726	0.0416076
K01689	enolase [EC:4.2.1.11]	0.0727598	0.151889	0.128252	0.0610158	0.299645	0.158485	0.0957917	0.162812
K07079		0.0727598	0.0111941	0.0036026	0.0492304	0.0146931	0.0328676	0.0225078	0.0465824
K03595	GTP-binding protein Era	0.0725978	0.0263391	0.0260588	0.0575846	0.0432978	0.0322673	0.0609099	0.0219344
K14227	tRNA Ile	0.0722737	0.090431	0.0677288	0.0875704	0.0626801	0.0708379	0.0738172	0.0809539
K00625	phosphate acetyltransferase [EC:2.3.1.8]	0.0721116	0.0568486	0.0498359	0.0390859	0.106447	0.0564302	0.0993119	0.0429644
K00123	formate dehydrogenase, alpha subunit [EC:1.2.1.2]	0.0721116	0.218834	0.0636459	0.237648	0.0786237	0.200507	0.154995	0.342132
K03686	molecular chaperone DnaJ	0.0719496	0.0226077	0.0922264	0.0444565	0.0520511	0.0546292	0.0324284	0.0474869
K07214	enterochelin esterase and related enzymes	0.0719496	0.00834072	0.00324234	0.0417712	0.006565	0.0526782	0.0973918	0.0307534
K03231	elongation factor EF-1 alpha subunit [EC:3.6.5.3]	0.0717875	0.163961	0.0530782	0.325368	0.0559588	0.129819	0.106032	0.213691
K01681	aconitate hydratase 1 [EC:4.2.1.3]	0.0717875	0.0482884	0.162477	0.0129789	0.0890965	0.0966517	0.0288015	0.0739439
K03797	carboxyl-terminal processing protease [EC:3.4.21.102]	0.0714634	0.00812123	0.0432311	0.0511697	0.0407968	0.0582312	0.0381887	0.033467
K01591	orotidine-5'-phosphate decarboxylase [EC:4.1.1.23]	0.0714634	0.0061458	0.0306221	0.0207364	0.0357949	0.0324173	0.0107739	0.0142461
K07478	putative ATPase	0.0708152	0.0423621	0.0689297	0.0247644	0.0573656	0.0519278	0.0254947	0.0411553
K03147	thiamine biosynthesis protein ThiC	0.0706532	0.113478	0.129934	0.112335	0.0867518	0.151281	0.132167	0.210751
K00645	[acyl-carrier-protein] S-malonyltransferase [EC:2.3.1.39]	0.070167	0.0208518	0.0299015	0.0632536	0.115356	0.048626	0.0524827	0.0269093
K05808	putative sigma-54 modulation protein	0.0695188	0.0118526	0.036026	0.0841392	0.0231338	0.0358692	0.0506693	0.0266831
K00850	6-phosphofructokinase [EC:2.7.1.11]	0.0690327	0.0259001	0.109759	0.0262562	0.0482997	0.0568804	0.0296549	0.0402508
K09903	uridylate kinase [EC:2.7.4.22]	0.0688706	0.0353383	0.0449124	0.0356547	0.138178	0.0706878	0.0616566	0.0470347
K04041	fructose-1,6-bisphosphatase III [EC:3.1.3.11]	0.0688706	0.0131696	0.0692899	0.0255103	0.0195387	0.0253636	0.0181343	0.017638
K06147	ATP-binding cassette, subfamily B, bacterial	0.0687086	0.0932844	0.336723	0.0568387	0.17366	0.104156	0.088538	0.112838
K12573	ribonuclease R [EC:3.1.-.-]	0.0682224	0.0217298	0.0688096	0.0420696	0.0640869	0.0742897	0.0417088	0.0429644
K02601	transcriptional antiterminator NusG	0.0680604	0.0333629	0.0271396	0.0683258	0.0381395	0.0516276	0.0291215	0.0621853
K02051	sulfonate/nitrate/taurine transport system substrate-binding protein	0.0678983	0.0221688	0.0205348	0.0510206	0.059554	0.0811934	0.0448023	0.0655772
K06180	ribosomal large subunit pseudouridine synthase D [EC:5.4.99.12]	0.0674122	0.03029	0.0542791	0.0378925	0.0298551	0.0478756	0.0395754	0.0280399
K03150	thiamine biosynthesis ThiH	0.0672501	0.0248027	0.121528	0.0267037	0.0676821	0.0457745	0.0288015	0.0273615
K00606	3-methyl-2-oxobutanoate hydroxymethyltransferase [EC:2.1.2.11]	0.0669261	0.0100967	0.0123689	0.0298366	0.0231338	0.0201108	0.0096005	0.0160551
K01945	phosphoribosylamine--glycine ligase [EC:6.3.4.13]	0.066764	0.0465325	0.0851413	0.0599715	0.0647122	0.0996533	0.0794708	0.109446
K01619	deoxyribose-phosphate aldolase [EC:4.1.2.4]	0.066602	0.00856022	0.0285806	0.0508714	0.0107854	0.0204109	0.0141874	0.0117587
K01662	1-deoxy-D-xylulose-5-phosphate synthase [EC:2.2.1.7]	0.0661158	0.0171204	0.105196	0.0196921	0.0995692	0.0676862	0.0162142	0.0420598
K00931	glutamate 5-kinase [EC:2.7.2.11]	0.0659538	0.00877971	0.0301417	0.0204381	0.0315745	0.0366196	0.0407488	0.0239696
K01154	type I restriction enzyme, S subunit [EC:3.1.21.3]	0.0656297	0.0206323	0.0437115	0.0544518	0.0228212	0.0201108	0.018241	0.0205777
K07456	DNA mismatch repair protein MutS2	0.0656297	0.0144865	0.0756545	0.026107	0.0193824	0.0219117	0.0169609	0.0113064
K01711	GDPmannose 4,6-dehydratase [EC:4.2.1.47]	0.0654676	0.0243637	0.0151309	0.0304333	0.0254785	0.0412721	0.0386154	0.0379895
K00177	2-oxoglutarate ferredoxin oxidoreductase subunit gamma [EC:1.2.7.3]	0.0653056	0.0498248	0.0234169	0.0751882	0.0754975	0.0613828	0.0905647	0.0445473
K03572	DNA mismatch repair protein MutL	0.0653056	0.0105357	0.0529582	0.0298366	0.0442356	0.0387207	0.0189877	0.0212561
K14236	tRNA Tyr	0.0651435	0.0561901	0.0614843	0.0647454	0.0539268	0.0501268	0.0468291	0.0694214
K06001	tryptophan synthase beta chain [EC:4.2.1.20]	0.0646574	0.107551	0.0380674	0.079962	0.125204	0.136873	0.121073	0.146079
K02564	glucosamine-6-phosphate deaminase [EC:3.5.99.6]	0.0644953	0.00965768	0.0154912	0.0447549	0.0081281	0.0340682	0.051416	0.0244218
K03340	diaminopimelate dehydrogenase [EC:1.4.1.16]	0.0638471	0.0208518	0.0186134	0.0355055	0.0432978	0.0567304	0.0597365	0.0418337
K03100	signal peptidase I [EC:3.4.21.89]	0.063361	0.0118526	0.0428709	0.027748	0.0382959	0.0343684	0.0372286	0.0205777
K01719	uroporphyrinogen-III synthase [EC:4.2.1.75]	0.0631989	0.00856022	0.00432311	0.0592256	0.00875334	0.0172592	0.026348	0.0149245
K07164		0.0631989	0.0280951	0.0157313	0.0328202	0.0400153	0.0252135	0.0512027	0.0137938
K02892	large subunit ribosomal protein L23	0.0631989	0.0177789	0.0153711	0.0753374	0.0139116	0.0397713	0.0624033	0.0309796
K00283	glycine dehydrogenase subunit 2 [EC:1.4.4.2]	0.0628748	0.0397282	0.0204147	0.0377433	0.0281357	0.041122	0.0538695	0.0341454
K03892	ArsR family transcriptional regulator	0.0628748	0.0215103	0.0649668	0.0249135	0.037358	0.015008	0.00245346	0.0133416
K01703	3-isopropylmalate/(R)-2-methylmalate dehydratase large subunit [EC:4.2.1.33 4.2.1.35]	0.0627128	0.0531172	0.0903051	0.0550485	0.0608044	0.0774414	0.0533361	0.0802755
K06217	phosphate starvation-inducible protein PhoH and related proteins	0.0622266	0.0735301	0.0946282	0.0323727	0.0517385	0.0625835	0.0424556	0.0764313
K03495	glucose inhibited division protein A	0.0622266	0.0287535	0.074934	0.0343121	0.0556462	0.061683	0.0194143	0.0357283
K02890	large subunit ribosomal protein L22	0.0619025	0.0649698	0.0342247	0.14247	0.0326687	0.0987528	0.104219	0.122109
K02881	large subunit ribosomal protein L18	0.0619025	0.0862606	0.0354255	0.11129	0.0368891	0.0849454	0.0951516	0.0651249
K07386	putative endopeptidase [EC:3.4.24.-]	0.0619025	0.0245832	0.00828597	0.0308809	0.0162562	0.0354189	0.0486425	0.0269093
K00820	glucosamine--fructose-6-phosphate aminotransferase (isomerizing) [EC:2.6.1.16]	0.0614164	0.044118	0.107718	0.0541534	0.0622112	0.0795426	0.0450157	0.0660294
K06158	ATP-binding cassette, sub-family F, member 3	0.0610923	0.0381917	0.0915059	0.0380416	0.068151	0.0732392	0.044589	0.0418337
K01878	glycyl-tRNA synthetase alpha chain [EC:6.1.1.14]	0.0610923	0.0438985	0.167281	0.0202889	0.0261037	0.0190602	0.0168542	0.0180903
K02316	DNA primase [EC:2.7.7.-]	0.0609303	0.0256806	0.0539188	0.0438598	0.0926916	0.0684366	0.0580297	0.035276
K03526	(E)-4-hydroxy-3-methylbut-2-enyl-diphosphate synthase [EC:1.17.7.1]	0.0606062	0.0228272	0.0425106	0.0264054	0.0395463	0.0498267	0.0376553	0.0355021
K04516	chorismate mutase [EC:5.4.99.5]	0.0602821	0.016462	0.00516372	0.0295382	0.0200076	0.0307665	0.0294415	0.00994964
K03685	ribonuclease III [EC:3.1.26.3]	0.0602821	0.00921869	0.0186134	0.042368	0.0312619	0.0465249	0.0244279	0.0255525
K14220	tRNA Asn	0.06012	0.0603605	0.0500761	0.0625076	0.0575219	0.039321	0.0450157	0.0540446
K02117	V-type H+-transporting ATPase subunit A [EC:3.6.3.14]	0.06012	0.231565	0.0761348	0.147094	0.124579	0.24283	0.179103	0.338514
K00057	glycerol-3-phosphate dehydrogenase (NAD(P)+) [EC:1.1.1.94]	0.059958	0.0239247	0.0349452	0.0438598	0.0411094	0.0573307	0.0567496	0.0364066
K00757	uridine phosphorylase [EC:2.4.2.3]	0.0597959	0.0125111	0.0270195	0.0325219	0.00687762	0.0192103	0.0277348	0.00994964
K02340	DNA polymerase III subunit delta [EC:2.7.7.7]	0.0597959	0.00197543	0.00600433	0.0571371	0.0289173	0.0276148	0.0096005	0.0146983
K01928	UDP-N-acetylmuramoylalanyl-D-glutamate--2,6-diaminopimelate ligase [EC:6.3.2.13]	0.0594718	0.0285341	0.0578817	0.0337153	0.0840946	0.0474254	0.0249613	0.0255525
K07137		0.0593098	0.0212908	0.099912	0.0186479	0.0490812	0.0372199	0.0200544	0.0275876
K08303	putative protease [EC:3.4.-.-]	0.0593098	0.0318264	0.101833	0.0662372	0.101914	0.0894479	0.0468291	0.0748484
K00401	methyl-coenzyme M reductase beta subunit [EC:2.8.4.1]	0.0589857	0.144426	0.044432	0.231681	0.0617423	0.123516	0.110939	0.240148
K00241	succinate dehydrogenase cytochrome b-556 subunit	0.0589857	0.0647503	0.00420303	0.112484	0.0270416	0.0657352	0.0680569	0.0452256
K02897	large subunit ribosomal protein L25	0.0586616	0.00658478	0.00396285	0.03834	0.0254785	0.0210112	0.0105606	0.0151506
K07407	alpha-galactosidase [EC:3.2.1.22]	0.0578513	0.0272171	0.00984709	0.0364006	0.110198	0.0959013	0.0428822	0.0556275
K03530	DNA-binding protein HU-beta	0.0576893	0.015584	0.0183732	0.0871228	0.0293862	0.0211613	0.0228279	0.0253264
K00705	4-alpha-glucanotransferase [EC:2.4.1.25]	0.0575272	0.0320459	0.0326635	0.0466943	0.0684636	0.0687368	0.0615499	0.0395724
K00811	aspartate aminotransferase [EC:2.6.1.1]	0.0572031	0.0195349	0.0247378	0.0410253	0.0321998	0.0276148	0.0276281	0.0198993
K01433	formyltetrahydrofolate deformylase [EC:3.5.1.10]	0.0572031	0.0245832	0.00396285	0.053855	0.0275105	0.0675361	0.0589897	0.0425121
K05970	sialate O-acetylesterase [EC:3.1.1.53]	0.0570411	0.00197543	0.00192138	0.0258086	0.0143805	0.0162087	0.00938716	0.008819
K02343	DNA polymerase III subunit gamma/tau [EC:2.7.7.7]	0.056879	0.0471909	0.0674886	0.0516173	0.0975372	0.07474	0.0539762	0.0585672
K14232	tRNA Pro	0.0565549	0.0700182	0.0581219	0.0616125	0.0631491	0.0499767	0.0549362	0.0624114
K00145	N-acetyl-gamma-glutamyl-phosphate/N-acetyl-gamma-aminoadipyl-phosphate reductase [EC:1.2.1.38 1.2.1.-]	0.0562308	0.0267781	0.0381875	0.0341629	0.0528326	0.0507271	0.0339218	0.0517834
K07107	acyl-CoA thioester hydrolase [EC:3.1.2.-]	0.0557447	0.0583851	0.0522376	0.218404	0.041422	0.0508772	0.0612299	0.0350499
K00548	5-methyltetrahydrofolate--homocysteine methyltransferase [EC:2.1.1.13]	0.0557447	0.0190959	0.121888	0.0198413	0.0865955	0.100404	0.0149341	0.0619591
K02078	acyl carrier protein	0.0552586	0.0285341	0.0216156	0.186777	0.0914411	0.0546292	0.095365	0.0409292
K00338	NADH dehydrogenase I subunit I [EC:1.6.5.3]	0.0547724	0.0491664	0.0070851	0.0613142	0.098944	0.0663355	0.0871512	0.0350499
K00560	thymidylate synthase [EC:2.1.1.45]	0.0546104	0.0403867	0.0363862	0.0386384	0.0586161	0.0684366	0.0651767	0.0590195
K00873	pyruvate kinase [EC:2.7.1.40]	0.0546104	0.0267781	0.0927068	0.0220791	0.0609607	0.0189101	0.0226145	0.0167335
K09125	hypothetical protein	0.0544483	0.00965768	0.00348251	0.0270021	0.0178193	0.0220618	0.0206944	0.0137938
K13038	phosphopantothenoylcysteine decarboxylase / phosphopantothenate--cysteine ligase [EC:4.1.1.36 6.3.2.5]	0.053476	0.00768224	0.0413098	0.0152167	0.0315745	0.0274647	0.00853378	0.0160551
K14126	F420-non-reducing hydrogenase subunit A [EC:1.12.99.-]	0.053476	0.154962	0.0560804	0.214376	0.055021	0.124266	0.114353	0.242862
K00942	guanylate kinase [EC:2.7.4.8]	0.053314	0.00329239	0.0198143	0.0126805	0.024228	0.0181597	0.0131207	0.010628
K06885		0.053314	0.00548732	0.00276199	0.0259578	0.00750286	0.0132071	0.00992052	0.00859287
K03168	DNA topoisomerase I [EC:5.99.1.2]	0.0529899	0.0438985	0.0491154	0.0405778	0.0432978	0.0399214	0.0305083	0.037085
K02118	V-type H+-transporting ATPase subunit B [EC:3.6.3.14]	0.0525037	0.173838	0.0501962	0.172903	0.0955052	0.212214	0.142727	0.310926
K00052	3-isopropylmalate dehydrogenase [EC:1.1.1.85]	0.0521796	0.0329239	0.0701305	0.0319251	0.0539268	0.0555297	0.0203744	0.0544969
K01786	L-ribulose-5-phosphate 4-epimerase [EC:5.1.3.4]	0.0518555	0.0129501	0.0363862	0.0468434	0.0401716	0.024313	0.0382953	0.0171857
K00215	dihydrodipicolinate reductase [EC:1.3.1.26]	0.0518555	0.0412646	0.0356657	0.0650438	0.0617423	0.0603323	0.0730705	0.0673862
K00320	coenzyme F420-dependent N5,N10-methenyltetrahydromethanopterin reductase [EC:1.5.99.11]	0.0516935	0.105795	0.0330238	0.27211	0.0367328	0.0808933	0.0725371	0.14427
K01696	tryptophan synthase beta chain [EC:4.2.1.20]	0.0516935	0.0777004	0.0629253	0.0608666	0.0665879	0.106707	0.0650701	0.116908
K07263	zinc protease [EC:3.4.99.-]	0.0516935	0.00526783	0.00288208	0.0304333	0.0048456	0.0343684	0.0156808	0.0156028
K03703	excinuclease ABC subunit C	0.0512073	0.0272171	0.0719318	0.043263	0.0694015	0.0606324	0.0248546	0.0443211
K01586	diaminopimelate decarboxylase [EC:4.1.1.20]	0.0512073	0.0357773	0.0873029	0.0680274	0.0803431	0.0670859	0.0355219	0.086381
K03455	monovalent cation:H+ antiporter-2, CPA2 family	0.0512073	0.00834072	0.00324234	0.0243168	0.00390774	0.0189101	0.0121606	0.0133416
K02899	large subunit ribosomal protein L27	0.0508832	0.0313875	0.0273797	0.0769784	0.0331376	0.0493764	0.0746706	0.0348237
K08138	MFS transporter, SP family, xylose:H+ symportor	0.0503971	0.0175594	0.00732528	0.0460975	0.00625238	0.039321	0.076804	0.0291705
K02911	large subunit ribosomal protein L32	0.0503971	0.0296315	0.0198143	0.0487828	0.0215707	0.0291156	0.0539762	0.026457
K06949	ribosome biogenesis GTPase [EC:3.6.1.-]	0.0502351	0.00153645	0.0293011	0.0165593	0.028761	0.0204109	0.00320017	0.0137938
K00845	glucokinase [EC:2.7.1.2]	0.0502351	0.00856022	0.0248579	0.0249135	0.030793	0.039171	0.0151475	0.019447
K07568	S-adenosylmethionine:tRNA ribosyltransferase-isomerase [EC:5.-.-.-]	0.050073	0.015145	0.036146	0.0322235	0.0719024	0.0409719	0.018881	0.0214822
K03406	methyl-accepting chemotaxis protein	0.049911	0.0190959	0.169442	0.0132773	0.0298551	0.0255136	0.0187743	0.0463563
K11749	regulator of sigma E protease [EC:3.4.24.-]	0.0495869	0.0175594	0.00492355	0.041622	0.0279794	0.0477255	0.0567496	0.0248741
K01079	phosphoserine phosphatase [EC:3.1.3.3]	0.0495869	0.0880166	0.0321832	0.21542	0.0431414	0.137023	0.115953	0.215048
K01812	glucuronate isomerase [EC:5.3.1.12]	0.0495869	0.044996	0.0164519	0.0507222	0.0683073	0.0489262	0.0670968	0.035276
K00566	tRNA-specific 2-thiouridylase [EC:2.8.1.-]	0.0494248	0.00965768	0.0420303	0.017156	0.0568967	0.0400714	0.00618699	0.0244218
K00349	Na+-transporting NADH:ubiquinone oxidoreductase subunit D [EC:1.6.5.-]	0.0492628	0.0814318	0.0126091	0.0653421	0.0781548	0.0568804	0.108379	0.0404769
K02916	large subunit ribosomal protein L35	0.0491007	0.0208518	0.0336242	0.0523632	0.0103164	0.0174093	0.0282681	0.0210299
K00201	formylmethanofuran dehydrogenase subunit B [EC:1.2.99.5]	0.0487766	0.165498	0.0375871	0.150227	0.0461113	0.161636	0.131954	0.245575
K00939	adenylate kinase [EC:2.7.4.3]	0.0486146	0.0338019	0.0369866	0.0601207	0.0553336	0.0570305	0.0633633	0.0515572
K01808	ribose 5-phosphate isomerase B [EC:5.3.1.6]	0.0484525	0.00943819	0.0160916	0.0356547	0.0190698	0.0250634	0.0381887	0.0205777
K05515	penicillin-binding protein 2	0.0482905	0.00526783	0.0163318	0.0170069	0.0293862	0.0297159	0.0169609	0.0185425
K03590	cell division protein FtsA	0.0482905	0.00570681	0.00228164	0.0338645	0.0259474	0.0348186	0.0284815	0.0217083
K01620	threonine aldolase [EC:4.1.2.5]	0.0482905	0.00658478	0.0362661	0.0176036	0.0239154	0.00945506	0.019841	0.0104019
K06926		0.0479664	0.00746275	0.0150108	0.0352072	0.0118795	0.0183098	0.018241	0.010628
K00948	ribose-phosphate pyrophosphokinase [EC:2.7.6.1]	0.0474802	0.043679	0.0713314	0.0262562	0.06565	0.0825442	0.0330684	0.0615069
K07240	chromate transporter	0.0474802	0.0111941	0.0767353	0.0198413	0.0259474	0.0162087	0.0215478	0.00655772
K03588	cell division protein FtsW	0.0473182	0.00965768	0.0112881	0.0513189	0.0081281	0.0195104	0.0370153	0.0128893
K00897	aminoglycoside 3'-phosphotransferase [EC:2.7.1.95]	0.0471561	0.00285341	0.00168121	0.00596732	0.00422036	0.00375201	0.00266681	0.00407031
K03665	GTP-binding protein HflX	0.0471561	0.0338019	0.0612441	0.0431139	0.0432978	0.0490763	0.0354152	0.0293967
K01491	methylenetetrahydrofolate dehydrogenase (NADP+) / methenyltetrahydrofolate cyclohydrolase [EC:1.5.1.5 3.5.4.9]	0.0469941	0.0375333	0.0419102	0.0408761	0.0600229	0.0571806	0.0491759	0.037085
K01277	dipeptidyl-peptidase III [EC:3.4.14.4]	0.0469941	0.00109746	0.00108078	0.0176036	0.00359512	0.00795426	0.00352018	0.00361805
K01585	arginine decarboxylase [EC:4.1.1.19]	0.04667	0.0425816	0.0135698	0.0495287	0.0503317	0.0922994	0.0500293	0.0572104
K01209	alpha-N-arabinofuranosidase [EC:3.2.1.55]	0.0465079	0.0190959	0.0431111	0.0267037	0.0407968	0.0445738	0.0440556	0.0409292
K07154		0.0463459	0.029412	0.0331439	0.0408761	0.00922227	0.0217616	0.0278415	0.00927126
K00762	orotate phosphoribosyltransferase [EC:2.4.2.10]	0.0463459	0.015145	0.0524778	0.0437106	0.0397026	0.0405217	0.0270947	0.0569843
K00640	serine O-acetyltransferase [EC:2.3.1.30]	0.0461838	0.0324849	0.0348251	0.0256595	0.0509569	0.0534286	0.026348	0.0554014
K00013	histidinol dehydrogenase [EC:1.1.1.23]	0.0461838	0.0223883	0.0399888	0.0222283	0.0361075	0.0441236	0.0259214	0.0291705
K01950	NAD+ synthase (glutamine-hydrolysing) [EC:6.3.5.1]	0.0460218	0.0125111	0.0600433	0.0223774	0.0334503	0.0343684	0.025388	0.015829
K02518	translation initiation factor IF-1	0.0458597	0.0118526	0.0181331	0.0698176	0.0123485	0.0253636	0.0373353	0.0187686
K03269	UDP-2,3-diacylglucosamine hydrolase [EC:3.6.1.-]	0.0455356	0.00526783	0.00588424	0.0319251	0.0220397	0.0160586	0.0135474	0.00520095
K01409	O-sialoglycoprotein endopeptidase [EC:3.4.24.57]	0.0455356	0.0252417	0.0449124	0.0498271	0.059085	0.0493764	0.0626166	0.0312057
K03305	proton-dependent oligopeptide transporter, POT family	0.0455356	0.016462	0.00432311	0.0380416	0.0376706	0.0241629	0.0593098	0.0221606
K02956	small subunit ribosomal protein S15	0.0453736	0.0269976	0.0193339	0.1004	0.0329813	0.0678363	0.0819243	0.0884161
K03733	integrase/recombinase XerC	0.0452115	0.00526783	0.00492355	0.0268529	0.00625238	0.0114061	0.00725371	0.00678385
K01372	bleomycin hydrolase [EC:3.4.22.40]	0.0452115	0.00768224	0.00924666	0.0101444	0.0168814	0.0127568	0.0132274	0.00927126
K03281	chloride channel protein, CIC family	0.0452115	0.00987717	0.00468337	0.019543	0.0372017	0.0331677	0.026028	0.0135677
K00031	isocitrate dehydrogenase [EC:1.1.1.42]	0.0450495	0.0557511	0.117925	0.0125314	0.0744034	0.0901983	0.0302949	0.0834413
K06168	bifunctional enzyme involved in thiolation and methylation of tRNA	0.0450495	0.0190959	0.0534385	0.0198413	0.0384522	0.0469751	0.0171742	0.0269093
K00773	queuine tRNA-ribosyltransferase [EC:2.4.2.29]	0.0448874	0.031168	0.05548	0.0275988	0.0822188	0.0688869	0.0283748	0.0443211
K02954	small subunit ribosomal protein S14	0.0444013	0.045435	0.0285806	0.0705635	0.0351697	0.0396212	0.0609099	0.0388941
K01929	UDP-N-acetylmuramoylalanyl-D-glutamyl-2,6-diaminopimelate--D-alanyl-D-alanine ligase [EC:6.3.2.10]	0.0444013	0.00943819	0.0398687	0.0287923	0.0370454	0.0372199	0.0220812	0.0214822
K00099	1-deoxy-D-xylulose-5-phosphate reductoisomerase [EC:1.1.1.267]	0.0442393	0.0219493	0.0409495	0.042368	0.0567404	0.0588315	0.0600565	0.0413815
K00818	acetylornithine aminotransferase [EC:2.6.1.11]	0.0442393	0.00856022	0.00336242	0.0173052	0.0253222	0.0157584	0.0145074	0.00587933
K13043	N-succinyl-L-ornithine transcarbamylase [EC:2.1.3.11]	0.0439152	0.0283146	0.00840606	0.0374449	0.0332939	0.0312167	0.0360552	0.0167335
K01206	alpha-L-fucosidase [EC:3.2.1.51]	0.0437531	0.0114136	0.00936675	0.0158134	0.00359512	0.0259639	0.0118406	0.0135677
K00806	undecaprenyl diphosphate synthase [EC:2.5.1.31]	0.0435911	0.00943819	0.0247378	0.0219299	0.0129737	0.0166589	0.0102405	0.0101758
K03321	sulfate permease, SulP family	0.043429	0.0267781	0.00912657	0.0331186	0.0684636	0.0624334	0.0410688	0.0368589
K02529	LacI family transcriptional regulator	0.043267	0.0061458	0.0676087	0.0201397	0.034857	0.0247632	0.0116273	0.0298489
K00432	glutathione peroxidase [EC:1.11.1.9]	0.043267	0.0186569	0.0136899	0.0599715	0.0640869	0.0394711	0.0624033	0.0418337
K11717	cysteine desulfurase / selenocysteine lyase [EC:2.8.1.7 4.4.1.16]	0.043267	0.0370943	0.023657	0.0278972	0.113168	0.0883973	0.0600565	0.0468085
K01914	aspartate--ammonia ligase [EC:6.3.1.1]	0.043267	0.0184374	0.0408294	0.0325219	0.0237591	0.0319671	0.024748	0.0203515
K10206	LL-diaminopimelate aminotransferase [EC:2.6.1.83]	0.0429429	0.0250222	0.0447923	0.0647454	0.02626	0.0397713	0.0297616	0.0619591
K00319	methylenetetrahydromethanopterin dehydrogenase [EC:1.5.99.9]	0.0427808	0.0864801	0.0237771	0.244809	0.0354823	0.0950008	0.0684836	0.162134
K11085	ATP-binding cassette, subfamily B, bacterial MsbA [EC:3.6.3.-]	0.0424567	0.0252417	0.0463534	0.0290907	0.00390774	0.01861	0.0178143	0.0104019
K02040	phosphate transport system substrate-binding protein	0.0421326	0.00702377	0.0426307	0.0190954	0.0128174	0.0127568	0.00789375	0.00814062
K01465	dihydroorotase [EC:3.5.2.3]	0.0421326	0.0118526	0.0566808	0.018797	0.0457987	0.0405217	0.0069337	0.0237435
K02968	small subunit ribosomal protein S20	0.0421326	0.0144865	0.0174125	0.0496779	0.0162562	0.0214615	0.0327484	0.0185425
K03110	fused signal recognition particle receptor	0.0419706	0.0305095	0.0463534	0.0426663	0.0448609	0.057931	0.0400021	0.0447734
K03786	3-dehydroquinate dehydratase II [EC:4.2.1.10]	0.0419706	0.00197543	0.0036026	0.0119346	0.00422036	0.00585313	0.00224012	0.00248741
K02113	F-type H+-transporting ATPase subunit delta [EC:3.6.3.14]	0.0419706	0.00877971	0.0123689	0.0346104	0.0123485	0.024313	0.0435223	0.0160551
K00703	starch synthase [EC:2.4.1.21]	0.0414844	0.0190959	0.0670083	0.0152167	0.0400153	0.0321172	0.00949383	0.0205777
K01776	glutamate racemase [EC:5.1.1.3]	0.0413224	0.00856022	0.0172925	0.0232725	0.0232901	0.0234125	0.0219745	0.0183164
K05593	aminoglycoside 6-adenylyltransferase [EC:2.7.7.-]	0.0411603	0	0.000840606	0.00835424	0.000312619	0.00015008	0.000106672	0.000452256
K00599		0.0409983	0.00680427	0.113722	0.022825	0.0209455	0.0189101	0.0170676	0.0131154
K03927	carboxylesterase type B [EC:3.1.1.1]	0.040188	0.0195349	0.0172925	0.0267037	0.0731529	0.0502769	0.0403221	0.0316579
K01714	dihydrodipicolinate synthase [EC:4.2.1.52]	0.040188	0.0182179	0.0672484	0.0302841	0.041422	0.0472753	0.0186676	0.0567582
K00626	acetyl-CoA C-acetyltransferase [EC:2.3.1.9]	0.040026	0.0623359	0.0737331	0.0471418	0.0417347	0.0670859	0.0546162	0.129571
K03169	DNA topoisomerase III [EC:5.99.1.2]	0.0398639	0.044118	0.0303819	0.0338645	0.0890965	0.0799928	0.0302949	0.0492959
K01924	UDP-N-acetylmuramate--alanine ligase [EC:6.3.2.8]	0.0393778	0.0131696	0.0560804	0.0226758	0.074716	0.0592817	0.0184543	0.0325625
K04751	nitrogen regulatory protein P-II 1	0.0392157	0.00526783	0.00576415	0.0395335	0.0157873	0.0148579	0.0101339	0.0101758
K00975	glucose-1-phosphate adenylyltransferase [EC:2.7.7.27]	0.0392157	0.0245832	0.205708	0.0125314	0.0554899	0.0379703	0.00789375	0.0255525
K03498	trk system potassium uptake protein TrkH	0.0390537	0.00746275	0.0826195	0.0131281	0.0251658	0.0258138	0.00746706	0.017638
K01188	beta-glucosidase [EC:3.2.1.21]	0.0387296	0.0250222	0.00948683	0.0275988	0.0236027	0.0508772	0.0669902	0.0309796
K02838	ribosome recycling factor	0.0387296	0.00790174	0.0230566	0.0101444	0.0226649	0.0219117	0.00832043	0.0131154
K14223	tRNA Gln	0.0387296	0.0318264	0.0276199	0.0504238	0.0311056	0.0250634	0.0286948	0.0321102
K03625	N utilization substance protein B	0.0385676	0.0030729	0.0109279	0.0126805	0.0121921	0.0142576	0.00650701	0.00700997
K01938	formate--tetrahydrofolate ligase [EC:6.3.4.3]	0.0385676	0.110844	0.0928269	0.022825	0.0611171	0.0811934	0.0679502	0.13319
K04066	primosomal protein N' (replication factor Y) (superfamily II helicase) [EC:3.6.4.-]	0.0382435	0.00768224	0.0625651	0.0177528	0.0450172	0.0417223	0.0142941	0.0228389
K02919	large subunit ribosomal protein L36	0.0382435	0.0381917	0.0351853	0.0528108	0.041422	0.0285153	0.0346685	0.0232912
K00343	NADH dehydrogenase I subunit N [EC:1.6.5.3]	0.0380814	0.016462	0.00732528	0.0258086	0.0581472	0.0582312	0.0199477	0.0318841
K12251	N-carbamoylputrescine amidase [EC:3.5.1.53]	0.0379194	0.0122916	0.0300216	0.018797	0.0284483	0.0283652	0.013654	0.0212561
K00147	glutamate-5-semialdehyde dehydrogenase [EC:1.2.1.41]	0.0377573	0.0184374	0.0560804	0.015515	0.045955	0.0472753	0.0154675	0.0269093
K01007	pyruvate, water dikinase [EC:2.7.9.2]	0.0375953	0.0935039	0.0798575	0.112186	0.0400153	0.0799928	0.0708304	0.153541
K03496	chromosome partitioning protein	0.0371091	0.0357773	0.0309823	0.0307317	0.0461113	0.0354189	0.0213344	0.035276
K03075	preprotein translocase subunit SecG	0.0369471	0.00658478	0.0036026	0.0177528	0.01313	0.00930498	0.00608032	0.00633159
K03389	heterodisulfide reductase subunit B [EC:1.8.98.1]	0.0369471	0.0689207	0.0306221	0.155747	0.0293862	0.0571806	0.0546162	0.114873
K02913	large subunit ribosomal protein L33	0.036623	0.0261196	0.0169322	0.0493795	0.0106291	0.0214615	0.025068	0.0149245
K07029		0.0364609	0.00438985	0.0278601	0.0235709	0.0192261	0.0217616	0.0103472	0.0101758
K01622	fructose 1,6-bisphosphate aldolase/phosphatase [EC:4.1.2.13 3.1.3.11]	0.0364609	0.0989912	0.0228164	0.164549	0.0397026	0.0907986	0.076164	0.172762
K00046	gluconate 5-dehydrogenase [EC:1.1.1.69]	0.0362989	0.0733106	0.0214955	0.0817522	0.0350133	0.0867464	0.090138	0.128667
K01661	naphthoate synthase [EC:4.1.3.36]	0.0361368	0.0120721	0.00828597	0.0170069	0.00359512	0.0135072	0.0256013	0.008819
K03617	electron transport complex protein RnfA	0.0359748	0.0250222	0.02774	0.0525124	0.00875334	0.0265642	0.0398954	0.0203515
K03289	MFS transporter, NHS family, nucleoside permease	0.0359748	0.0100967	0.00276199	0.0192446	0.0587724	0.0136573	0.0169609	0.0122109
K11175	phosphoribosylglycinamide formyltransferase 1 [EC:2.1.2.2]	0.0359748	0.00329239	0.0169322	0.0137248	0.0200076	0.0151581	0.00277348	0.00972351
K00330	NADH dehydrogenase I subunit A [EC:1.6.5.3]	0.0359748	0.0555317	0.00300216	0.0523632	0.0528326	0.0496766	0.0803242	0.0327886
K00425	cytochrome bd-I oxidase subunit I [EC:1.10.3.-]	0.0356507	0.0158035	0.0133296	0.0314776	0.00937858	0.0244631	0.0358419	0.0174119
K01791	UDP-N-acetylglucosamine 2-epimerase [EC:5.1.3.14]	0.0356507	0.0274366	0.0159715	0.0447549	0.0368891	0.0465249	0.0286948	0.0508788
K00766	anthranilate phosphoribosyltransferase [EC:2.4.2.18]	0.0354886	0.0318264	0.0453927	0.0395335	0.09191	0.0394711	0.0389354	0.0470347
K06959	uncharacterized protein	0.0351645	0.0504833	0.100632	0.0265546	0.0709646	0.0986028	0.032215	0.0777881
K02434	aspartyl-tRNA(Asn)/glutamyl-tRNA (Gln) amidotransferase subunit B [EC:6.3.5.6 6.3.5.7]	0.0351645	0.0682622	0.0821392	0.0936869	0.0622112	0.0868965	0.0420289	0.119396
K03624	transcription elongation factor GreA	0.0351645	0.0122916	0.0260588	0.0193938	0.0250095	0.0210112	0.00906714	0.0167335
K07037		0.0351645	0.00395087	0.00156112	0.0196921	0.0318872	0.0333178	0.0116273	0.0167335
K01258	tripeptide aminopeptidase [EC:3.4.11.4]	0.0350025	0.0109746	0.0489953	0.0146199	0.0195387	0.0240128	0.0148274	0.0178641
K00226	dihydroorotate oxidase [EC:1.3.3.1]	0.0348404	0.0089992	0.0250981	0.0210348	0.0367328	0.0270145	0.0129073	0.0239696
K13789	geranylgeranyl diphosphate synthase, type II [EC:2.5.1.1 2.5.1.10 2.5.1.29]	0.0346784	0.0061458	0.0200544	0.0102936	0.0261037	0.0210112	0.00682702	0.0149245
K01783	ribulose-phosphate 3-epimerase [EC:5.1.3.1]	0.0345163	0.00921869	0.0178929	0.0316268	0.0248532	0.0234125	0.0269881	0.0180903
K00282	glycine dehydrogenase subunit 1 [EC:1.4.4.2]	0.0343543	0.00921869	0.00948683	0.0190954	0.0179756	0.0180096	0.0184543	0.00746223
K01858	myo-inositol-1-phosphate synthase [EC:5.5.1.4]	0.0343543	0.0421426	0.0162117	0.0469926	0.0178193	0.0481758	0.0391487	0.0538185
K00638	chloramphenicol O-acetyltransferase [EC:2.3.1.28]	0.0343543	0.15145	0.0325434	0.16067	0.100663	0.14993	0.140487	0.253264
K02115	F-type H+-transporting ATPase subunit gamma [EC:3.6.3.14]	0.0343543	0.0136085	0.045873	0.0307317	0.0123485	0.0288154	0.0356285	0.0212561
K03587	cell division protein FtsI (penicillin-binding protein 3) [EC:2.4.1.129]	0.0341922	0.0059263	0.0122488	0.0174544	0.0329813	0.024313	0.0162142	0.0110803
K02124	V-type H+-transporting ATPase subunit K [EC:3.6.3.14]	0.0341922	0.0662868	0.0202946	0.108456	0.0417347	0.0790923	0.0394687	0.104923
K01978	M1 RNA	0.0341922	0.0263391	0.0534385	0.0196921	0.0304804	0.0262641	0.0160008	0.0291705
K02824	uracil permease	0.0341922	0.0357773	0.0643664	0.094582	0.0214144	0.0288154	0.0622966	0.0359544
K03551	holliday junction DNA helicase RuvB	0.0340302	0.0432401	0.0405892	0.0331186	0.0317308	0.0426228	0.0466158	0.0321102
K00609	aspartate carbamoyltransferase catalytic subunit [EC:2.1.3.2]	0.0338681	0.0239247	0.0505564	0.0390859	0.0229775	0.035569	0.0317883	0.0298489
K00651	homoserine O-succinyltransferase [EC:2.3.1.46]	0.0338681	0.00746275	0.034705	0.0207364	0.0123485	0.0120064	0.0222945	0.0072361
K02904	large subunit ribosomal protein L29	0.0338681	0.0636529	0.0226964	0.0917475	0.0211018	0.0484759	0.0454424	0.0648988
K00794	riboflavin synthase beta chain [EC:2.5.1.-]	0.0337061	0.0149255	0.0232968	0.0387876	0.0157873	0.0210112	0.013014	0.0303012
K00791	tRNA dimethylallyltransferase [EC:2.5.1.75]	0.033382	0.0061458	0.0243776	0.0147691	0.0365764	0.0175594	0.00853378	0.00972351
K02035	peptide/nickel transport system substrate-binding protein	0.033382	0.0438985	0.0722921	0.0707127	0.12411	0.113461	0.039042	0.130476
K00973	glucose-1-phosphate thymidylyltransferase [EC:2.7.7.24]	0.03322	0.0456545	0.0285806	0.0444565	0.0514259	0.0607825	0.0341351	0.0594717
K12308	beta-galactosidase [EC:3.2.1.23]	0.0328959	0.0059263	0.0635258	0.0120838	0.0125048	0.0126067	0.00650701	0.00768836
K02190	sirohydrochlorin cobaltochelatase [EC:4.99.1.3]	0.0328959	0.0140475	0.00540389	0.0883163	0.00953489	0.0283652	0.0727505	0.0205777
K01495	GTP cyclohydrolase I [EC:3.5.4.16]	0.0328959	0.014706	0.019454	0.015515	0.0215707	0.0303162	0.0364819	0.0201254
K00817	histidinol-phosphate aminotransferase [EC:2.6.1.9]	0.0328959	0.0175594	0.0337443	0.0429647	0.0593976	0.0625835	0.0345618	0.0513311
K00348	Na+-transporting NADH:ubiquinone oxidoreductase subunit C [EC:1.6.5.-]	0.0327338	0.0149255	0.00528381	0.0287923	0.0586161	0.0172592	0.0215478	0.008819
K07098		0.0327338	0.00263391	0.00564407	0.0126805	0.0189135	0.0180096	0.0169609	0.0104019
K02528	16S rRNA (adenine1518-N6/adenine1519-N6)-dimethyltransferase [EC:2.1.1.182]	0.0327338	0.0105357	0.0240173	0.0199905	0.0312619	0.0283652	0.0265614	0.0217083
K01256	aminopeptidase N [EC:3.4.11.2]	0.0324097	0.00438985	0.00468337	0.0183495	0.0123485	0.0124567	0.00586697	0.00497482
K03615	electron transport complex protein RnfC	0.0324097	0.0105357	0.045873	0.0170069	0.0437667	0.0144077	0.0219745	0.00949738
K01657	anthranilate synthase component I [EC:4.1.3.27]	0.0322477	0.0241442	0.058362	0.0255103	0.0650248	0.0661854	0.0266681	0.0540446
K06941	ribosomal RNA large subunit methyltransferase N [EC:2.1.1.-]	0.0320856	0.0469714	0.058362	0.228847	0.0445482	0.0342183	0.0264547	0.0388941
K03543	multidrug resistance protein A	0.0317615	0.0114136	0.0925867	0.0140232	0.00609607	0.0148579	0.0281615	0.00768836
K01000	phospho-N-acetylmuramoyl-pentapeptide-transferase [EC:2.7.8.13]	0.0317615	0.0199738	0.0391482	0.0164101	0.041891	0.0337681	0.0105606	0.0237435
K00200	formylmethanofuran dehydrogenase subunit A [EC:1.2.99.5]	0.0317615	0.122477	0.0229365	0.101146	0.0472055	0.140475	0.12822	0.250098
K01129	dGTPase [EC:3.1.5.1]	0.0315995	0.0153645	0.0349452	0.0165593	0.0625238	0.0417223	0.0088538	0.0273615
K02313	chromosomal replication initiator protein	0.0314374	0.0144865	0.0606437	0.0208856	0.0512695	0.0364695	0.012694	0.024648
K02377	GDP-L-fucose synthase [EC:1.1.1.271]	0.0314374	0.0390697	0.0201745	0.0305825	0.00859703	0.0306164	0.0340284	0.0266831
K01653	acetolactate synthase I/III small subunit [EC:2.2.1.6]	0.0314374	0.014706	0.0348251	0.0199905	0.0265726	0.0292657	0.0135474	0.0307534
K01854	UDP-galactopyranose mutase [EC:5.4.99.9]	0.0312754	0.0263391	0.0154912	0.0842884	0.0134426	0.0144077	0.0109872	0.0165074
K07792	anaerobic C4-dicarboxylate transporter DcuB	0.0312754	0.0100967	0.00204147	0.0258086	0.0257911	0.015008	0.0272014	0.00949738
K14127	F420-non-reducing hydrogenase iron-sulfur subunit D [EC:1.12.99.-]	0.0312754	0.0715546	0.0223361	0.199905	0.0231338	0.0588315	0.0477892	0.115099
K00790	UDP-N-acetylglucosamine 1-carboxyvinyltransferase [EC:2.5.1.7]	0.0312754	0.0223883	0.0577616	0.0165593	0.0432978	0.0331677	0.0146141	0.0251002
K09457	7-cyano-7-deazaguanine reductase [EC:1.7.1.13]	0.0312754	0.0219493	0.0201745	0.0192446	0.0243843	0.0289655	0.0281615	0.0287183
K06131	cardiolipin synthase [EC:2.7.8.-]	0.0311133	0.00109746	0.0660476	0.00969689	0.00953489	0.00810434	0.00405355	0.00361805
K15035	transfer-messenger RNA	0.0307892	0.00877971	0.0479145	0.0128297	0.0303241	0.0207111	0.0106672	0.0160551
K02342	DNA polymerase III subunit epsilon [EC:2.7.7.7]	0.0306272	0.0215103	0.00192138	0.029389	0.0579909	0.0340682	0.025388	0.0160551
K12340	outer membrane channel protein TolC	0.0304651	0.00351188	0.00192138	0.0168577	0.0357949	0.0276148	0.00448023	0.0128893
K02563	UDP-N-acetylglucosamine--N-acetylmuramyl-(pentapeptide) pyrophosphoryl-undecaprenol N-acetylglucosamine transferase [EC:2.4.1.227]	0.0304651	0.00460935	0.0348251	0.0132773	0.0236027	0.020561	0.0117339	0.0149245
K05837	rod shape determining protein RodA	0.0303031	0.00636529	0.0404692	0.0111887	0.0184445	0.0222119	0.0114139	0.0128893
K14231	tRNA Phe	0.0303031	0.045435	0.0339845	0.0414729	0.0378269	0.0328676	0.0344551	0.0461302
K00847	fructokinase [EC:2.7.1.4]	0.030141	0.00790174	0.0307421	0.0234217	0.0303241	0.0247632	0.0243213	0.0131154
K04068	anaerobic ribonucleoside-triphosphate reductase activating protein [EC:1.97.1.4]	0.029979	0.00658478	0.0229365	0.0147691	0.0223523	0.0201108	0.0150408	0.0126632
K01921	D-alanine-D-alanine ligase [EC:6.3.2.4]	0.029979	0.00768224	0.0312225	0.0252119	0.0356386	0.0328676	0.0183476	0.0174119
K07315	sigma-B regulation protein RsbU (phosphoserine phosphatase)	0.0296549	0.00768224	0.0026419	0.0323727	0.0493938	0.0690369	0.0259214	0.0314318
K09748	hypothetical protein	0.0294928	0.00548732	0.0118886	0.0198413	0.0184445	0.0126067	0.0146141	0.00655772
K02428	nucleoside-triphosphate pyrophosphatase [EC:3.6.1.19]	0.0294928	0.00219493	0.00120087	0.0213332	0.0207892	0.0169591	0.00277348	0.00791449
K00180	indolepyruvate ferredoxin oxidoreductase, beta subunit [EC:1.2.7.8]	0.0294928	0.031607	0.0080458	0.039981	0.0440793	0.0454743	0.0352018	0.0445473
K02065	putative ABC transport system ATP-binding protein	0.0293308	0.00460935	0.0127292	0.0207364	0.035326	0.0340682	0.00661368	0.0187686
K07089		0.0293308	0.015584	0.00720519	0.0637011	0.126611	0.0660353	0.0796842	0.042286
K00176	2-oxoglutarate ferredoxin oxidoreductase subunit delta [EC:1.2.7.3]	0.0293308	0.0259001	0.00756545	0.0323727	0.0370454	0.0174093	0.0231479	0.0183164
K02536	UDP-3-O-[3-hydroxymyristoyl] glucosamine N-acyltransferase [EC:2.3.1.-]	0.0291687	0.00395087	0.0103274	0.0128297	0.0337629	0.0201108	0.0096005	0.0108542
K01918	pantoate--beta-alanine ligase [EC:6.3.2.1]	0.0291687	0.00351188	0.0130894	0.0176036	0.0243843	0.0181597	0.00565363	0.00859287
K00581	tetrahydromethanopterin S-methyltransferase subunit E [EC:2.1.1.86]	0.0291687	0.0796759	0.0176527	0.105622	0.0292299	0.080443	0.06443	0.141556
K00297	methylenetetrahydrofolate reductase (NADPH) [EC:1.5.1.20]	0.0290067	0.00460935	0.0366264	0.0199905	0.0261037	0.0277649	0.0174942	0.0189948
K06966		0.0288446	0.00263391	0.00696502	0.0147691	0.0228212	0.0180096	0.00373353	0.0110803
K08218	MFS transporter, PAT family, beta-lactamase induction signal transducer AmpG	0.0286826	0.00504833	0.00468337	0.0202889	0.00265726	0.0142576	0.0107739	0.00633159
K03044	DNA-directed RNA polymerase subunit B' [EC:2.7.7.6]	0.0286826	0.0950403	0.0202946	0.101594	0.0314182	0.0885474	0.0786174	0.158064
K07148	uncharacterized protein	0.0286826	0.0186569	0.00132095	0.0173052	0.0708082	0.039171	0.0544028	0.0260047
K03282	large conductance mechanosensitive channel	0.0286826	0.0348993	0.00936675	0.035058	0.0350133	0.0231124	0.0267747	0.0232912
K02346	DNA polymerase IV [EC:2.7.7.7]	0.0286826	0.013828	0.0120087	0.0255103	0.0171941	0.0175594	0.0148274	0.0108542
K06041	arabinose-5-phosphate isomerase [EC:5.3.1.13]	0.0286826	0.00153645	0.00732528	0.00775751	0.00312619	0.00630337	0.00458691	0.00339192
K02527	3-deoxy-D-manno-octulosonic-acid transferase [EC:2.-.-.-]	0.0285205	0.0133891	0.00612441	0.0232725	0.0342318	0.029866	0.0268814	0.0214822
K01999	branched-chain amino acid transport system substrate-binding protein	0.0285205	0.00482884	0.0121287	0.00208856	0.0104727	0.00300161	0.00416022	0.00474869
K07095		0.0285205	0.00812123	0.0212553	0.0117855	0.0139116	0.0159085	0.00810709	0.00927126
K03315	Na+:H+ antiporter, NhaC family	0.0283585	0.0030729	0.0080458	0.0107412	0.00406405	0.013057	0.00597365	0.00587933
K02334	DNA polymerase bacteriophage-type [EC:2.7.7.7]	0.0283585	0.0355578	0.0518774	0.0143216	0.00390774	0.00525281	0.00480025	0.00927126
K02110	F-type H+-transporting ATPase subunit c [EC:3.6.3.14]	0.0283585	0.030729	0.0154912	0.0568387	0.0223523	0.0214615	0.0509893	0.0135677
K01625	2-dehydro-3-deoxyphosphogluconate aldolase / 4-hydroxy-2-oxoglutarate aldolase [EC:4.1.2.14 4.1.3.16]	0.0283585	0.0452155	0.0115283	0.0328202	0.0386085	0.0384206	0.0506693	0.028266
K00402	methyl-coenzyme M reductase gamma subunit [EC:2.8.4.1]	0.0281964	0.0708961	0.0228164	0.125164	0.0293862	0.0759406	0.0599498	0.130476
K01695	tryptophan synthase alpha chain [EC:4.2.1.20]	0.0281964	0.0153645	0.0278601	0.0335662	0.0271979	0.0300161	0.0150408	0.0402508
K03499	trk system potassium uptake protein TrkA	0.0280344	0.0120721	0.0523577	0.0434122	0.0279794	0.0265642	0.0227212	0.0287183
K00016	L-lactate dehydrogenase [EC:1.1.1.27]	0.0278724	0.00482884	0.0839405	0.00149183	0.015162	0.00135072	0.00277348	0.00113064
K03303	lactate transporter, LctP family	0.0278724	0.00921869	0.00192138	0.0246152	0.0226649	0.0213114	0.0281615	0.0151506
K06890		0.0277103	0.00109746	0.000840606	0.0313284	0.00515822	0.00375201	0.00352018	0.00293967
K03629	DNA replication and repair protein RecF	0.0275483	0.00351188	0.0295413	0.0126805	0.0296988	0.0226621	0.00448023	0.0140199
K02012	iron(III) transport system substrate-binding protein	0.0275483	0.0265586	0.0479145	0.00551977	0.00375143	0.00825442	0.0069337	0.0131154
K00337	NADH dehydrogenase I subunit H [EC:1.6.5.3]	0.0273862	0.0491664	0.019454	0.0331186	0.103008	0.0921493	0.0664568	0.044095
K01813	L-rhamnose isomerase [EC:5.3.1.14]	0.0273862	0.00438985	0.0278601	0.0162609	0.00531453	0.0196605	0.0139741	0.0171857
K02895	large subunit ribosomal protein L24	0.0272242	0.0346798	0.0120087	0.0748898	0.0204766	0.0484759	0.0567496	0.0499743
K01615	glutaconyl-CoA decarboxylase [EC:4.1.1.70]	0.0272242	0.014706	0.059683	0.00880179	0.00515822	0.00285153	0.00298682	0.00384418
K13747	carboxynorspermidine decarboxylase [EC:4.1.1.-]	0.0272242	0.00724326	0.0259387	0.0204381	0.030793	0.0249133	0.00458691	0.0140199
K02016	iron complex transport system substrate-binding protein	0.0270621	0.00636529	0.0299015	0.0161118	0.0154746	0.0265642	0.0110939	0.0165074
K03763	DNA polymerase III subunit alpha, Gram-positive type [EC:2.7.7.7]	0.0269001	0.0245832	0.142543	0.0146199	0.0440793	0.0333178	0.0105606	0.0239696
K00946	thiamine-monophosphate kinase [EC:2.7.4.16]	0.0269001	0.00417036	0.00516372	0.00984607	0.0193824	0.0193604	0.0174942	0.0113064
K03585	membrane fusion protein	0.0269001	0.0197543	0.00900649	0.0156642	0.0321998	0.0100554	0.0113073	0.00678385
K07058	membrane protein	0.0264139	0.00219493	0.0186134	0.0116363	0.019695	0.0181597	0.00394687	0.0117587
K03296	hydrophobic/amphiphilic exporter-1 (mainly G- bacteria), HAE1 family	0.0264139	0.0100967	0.0790169	0.00551977	0.125517	0.109108	0.00757373	0.0556275
K02495	oxygen-independent coproporphyrinogen III oxidase [EC:1.3.99.22]	0.0264139	0.00329239	0.0570411	0.00895098	0.0232901	0.0213114	0.00394687	0.0117587
K01534	Cd2+/Zn2+-exporting ATPase [EC:3.6.3.3 3.6.3.5]	0.0262519	0.0329239	0.074934	0.0193938	0.0190698	0.024313	0.0150408	0.0298489
K12410	NAD-dependent deacetylase [EC:3.5.1.-]	0.0260898	0.00460935	0.0288208	0.00954771	0.0265726	0.0172592	0.00661368	0.0122109
K09808	lipoprotein-releasing system permease protein	0.0260898	0.00987717	0.00504363	0.0196921	0.0329813	0.0367697	0.0139741	0.015829
K07560	D-tyrosyl-tRNA(Tyr) deacylase [EC:3.1.-.-]	0.0259278	0.00373138	0.0134497	0.017156	0.0240717	0.0144077	0.00704037	0.010628
K00384	thioredoxin reductase (NADPH) [EC:1.8.1.9]	0.0259278	0.0131696	0.0608839	0.0193938	0.032825	0.0289655	0.0158942	0.0210299
K01770	2-C-methyl-D-erythritol 2,4-cyclodiphosphate synthase [EC:4.6.1.12]	0.0259278	0.00329239	0.0159715	0.018797	0.022196	0.0183098	0.00661368	0.0151506
K00767	nicotinate-nucleotide pyrophosphorylase (carboxylating) [EC:2.4.2.19]	0.0259278	0.00877971	0.0267793	0.0184987	0.0381395	0.0400714	0.0216545	0.0198993
K09011	D-citramalate synthase [EC:2.3.1.182]	0.0257657	0.0129501	0.00372268	0.0278972	0.0218833	0.0231124	0.0264547	0.0271354
K07473	DNA-damage-inducible protein J	0.0256037	0.0030729	0.0453927	0.00745915	0.00359512	0.00180096	0	0.000452256
K02493	methyltransferase [EC:2.1.1.-]	0.0254416	0.00219493	0.023657	0.0123822	0.0171941	0.0174093	0.00266681	0.00814062
K02966	small subunit ribosomal protein S19e	0.0254416	0.0482884	0.0138099	0.142917	0.0206329	0.0327175	0.0314683	0.0682907
K14128	F420-non-reducing hydrogenase subunit G [EC:1.12.99.-]	0.0252796	0.0838462	0.0220959	0.0942836	0.028761	0.0828443	0.0585631	0.144948
K03650	tRNA modification GTPase	0.0252796	0.00965768	0.0363862	0.0229742	0.0323561	0.0291156	0.012054	0.0171857
K00800	3-phosphoshikimate 1-carboxyvinyltransferase [EC:2.5.1.19]	0.0252796	0.00877971	0.0399888	0.0198413	0.0279794	0.0376702	0.0146141	0.0391202
K01516	nucleoside-triphosphatase [EC:3.6.1.15]	0.0251175	0.0215103	0.0240173	0.0832441	0.0345444	0.0367697	0.0220812	0.0603762
K00604	methionyl-tRNA formyltransferase [EC:2.1.2.9]	0.0251175	0.00395087	0.0195741	0.0061165	0.0239154	0.0181597	0.00512027	0.008819
K06915		0.0251175	0.0482884	0.00984709	0.0431139	0.011098	0.0474254	0.0551495	0.0619591
K07025	putative hydrolase of the HAD superfamily	0.0247934	0.00680427	0.0357858	0.031776	0.0337629	0.0310666	0.00938716	0.0287183
K00074	3-hydroxybutyryl-CoA dehydrogenase [EC:1.1.1.157]	0.0247934	0.0103162	0.0431111	0.0116363	0.0181319	0.015008	0.0158942	0.0305273
K01448	N-acetylmuramoyl-L-alanine amidase [EC:3.5.1.28]	0.0246314	0.0030729	0.0423905	0.0402794	0.0203202	0.0264141	0.00565363	0.0108542
K00584	tetrahydromethanopterin S-methyltransferase subunit H [EC:2.1.1.86]	0.0244693	0.0632139	0.0121287	0.0817522	0.0298551	0.104306	0.0754173	0.173893
K00067	dTDP-4-dehydrorhamnose reductase [EC:1.1.1.133]	0.0244693	0.00746275	0.00792571	0.0108904	0.03939	0.0370698	0.00640033	0.0205777
K01993	HlyD family secretion protein	0.0241452	0.00987717	0.00876632	0.0113379	0.0443919	0.0354189	0.012054	0.0187686
K03631	DNA repair protein RecN (Recombination protein N)	0.0241452	0.00965768	0.0449124	0.0134265	0.0475181	0.0304663	0.0149341	0.0171857
K14155	cystathione beta-lyase [EC:4.4.1.8]	0.0239832	0.00438985	0.0455128	0.0170069	0.0271979	0.0267143	0.00821376	0.0210299
K00821	acetylornithine/N-succinyldiaminopimelate aminotransferase [EC:2.6.1.11 2.6.1.17]	0.0239832	0.0182179	0.0803379	0.0307317	0.0173504	0.0100554	0.0124807	0.0253264
K06861	lipopolysaccharide export system ATP-binding protein [EC:3.6.3.-]	0.0238211	0.00921869	0.0153711	0.0177528	0.0248532	0.0369198	0.0163209	0.0167335
K03687	molecular chaperone GrpE	0.0238211	0.00834072	0.0141702	0.0170069	0.0364201	0.0258138	0.0176009	0.0180903
K09686	antibiotic transport system permease protein	0.0236591	0.00570681	0.030502	0.0113379	0.0225086	0.0313668	0.00864045	0.0162812
K03437	RNA methyltransferase, TrmH family	0.023497	0.0030729	0.0247378	0.00895098	0.0223523	0.0207111	0.00362686	0.0135677
K03593	ATP-binding protein involved in chromosome partitioning	0.023497	0.00570681	0.00288208	0.0079067	0.0336066	0.0294157	0.00864045	0.0156028
K00979	3-deoxy-manno-octulosonate cytidylyltransferase (CMP-KDO synthetase) [EC:2.7.7.38]	0.023497	0.00197543	0.00576415	0.0126805	0.0098475	0.0102055	0.00522694	0.00429644
K00202	formylmethanofuran dehydrogenase subunit C [EC:1.2.99.5]	0.0231729	0.0715546	0.0172925	0.111589	0.0286047	0.0720385	0.0525894	0.128215
K01613	phosphatidylserine decarboxylase [EC:4.1.1.65]	0.0231729	0.00504833	0.0240173	0.00850343	0.0572093	0.0256637	0.00736038	0.0140199
K00125	formate dehydrogenase, beta subunit [EC:1.2.1.2]	0.0231729	0.0816513	0.0228164	0.114722	0.0370454	0.0769912	0.0681636	0.156933
K02108	F-type H+-transporting ATPase subunit a [EC:3.6.3.14]	0.0231729	0.0105357	0.0506765	0.0362515	0.0192261	0.0163588	0.0227212	0.00859287
K02426	cysteine desulfuration protein SufE	0.0231729	0.000877971	0.000840606	0.00895098	0.0209455	0.0106557	0.00234679	0.00587933
K01195	beta-glucuronidase [EC:3.2.1.31]	0.0231729	0.0190959	0.00276199	0.0167085	0.00453298	0.0151581	0.0224012	0.00633159
K01089	imidazoleglycerol-phosphate dehydratase / histidinol-phosphatase [EC:4.2.1.19 3.1.3.15]	0.0230109	0.0107551	0.00288208	0.0184987	0.00890965	0.0117063	0.0236812	0.00927126
K00891	shikimate kinase [EC:2.7.1.71]	0.0230109	0.00724326	0.0434713	0.00895098	0.0154746	0.0105056	0.0114139	0.00836674
K09181	hypothetical protein	0.0230109	0.0465325	0.00756545	0.0969689	0.0329813	0.0573307	0.06411	0.115099
K07046		0.0228488	0.00175594	0.00828597	0.00551977	0.000625238	0.00570305	0.00266681	0.00203515
K05942		0.0225247	0	0.00036026	0.0043263	0.00015631	0	0	0
K00027	malate dehydrogenase (oxaloacetate-decarboxylating) [EC:1.1.1.38]	0.0225247	0.0261196	0.0650869	0.00626568	0.0157873	0.0166589	0.0100272	0.0203515
K02433	aspartyl-tRNA(Asn)/glutamyl-tRNA (Gln) amidotransferase subunit A [EC:6.3.5.6 6.3.5.7]	0.0223627	0.0333629	0.0656873	0.0284939	0.0508006	0.0538788	0.0276281	0.0741701
K03497	chromosome partitioning protein, ParB family	0.0222007	0.0599215	0.0297815	0.00805588	0.050488	0.035569	0.0128007	0.0210299
K04764	integration host factor subunit alpha	0.0222007	0.000438985	0.000600433	0.0107412	0.0015631	0.00270145	0.000533361	0.00113064
K02025	multiple sugar transport system permease protein	0.0222007	0.0344604	0.0495957	0.00686241	0.0386085	0.0312167	0.0205877	0.0513311
K09157	hypothetical protein	0.0222007	0.0474104	0.0794973	0.00835424	0.0279794	0.0279149	0.0209078	0.0391202
K00611	ornithine carbamoyltransferase [EC:2.1.3.3]	0.0220386	0.0520198	0.0817789	0.0176036	0.0442356	0.0526782	0.0180276	0.0443211
K03292	glycoside/pentoside/hexuronide:cation symporter, GPH family	0.0220386	0.00329239	0.0760148	0.0205872	0.00875334	0.00810434	0.00608032	0.00587933
K00721	dolichol-phosphate mannosyltransferase [EC:2.4.1.83]	0.0218766	0.00702377	0.00348251	0.0180511	0.0318872	0.0406718	0.013014	0.0280399
K03606	putative colanic acid biosysnthesis UDP-glucose lipid carrier transferase	0.0218766	0.00482884	0.0036026	0.0183495	0.00312619	0.00405217	0.00544028	0.00203515
K11907	type VI secretion system protein VasG	0.0218766	0.00131696	0.0868225	0.00328202	0.00187572	0.00210112	0.000640033	0.00248741
K02860	16S rRNA processing protein RimM	0.0217145	0.00263391	0.0160916	0.0238693	0.0120358	0.013057	0.00224012	0.00474869
K01571	oxaloacetate decarboxylase, alpha subunit [EC:4.1.1.3]	0.0212284	0.015584	0.0605236	0.00477385	0.0184445	0.0141075	0.0151475	0.0289444
K05499	LacI family transcriptional regulator, repressor for deo operon, udp, cdd, tsx, nupC, and nupG	0.0212284	0.00109746	0.00120087	0.00641487	0.000625238	0.00585313	0.00352018	0.00293967
K08483	phosphotransferase system, enzyme I, PtsI [EC:2.7.3.9]	0.0212284	0.0204128	0.0766152	0.00671323	0.0598666	0.031817	0.00661368	0.0244218
K01533	Cu2+-exporting ATPase [EC:3.6.3.4]	0.0209043	0.0344604	0.0991915	0.0180511	0.0234464	0.0241629	0.0242146	0.0474869
K03116	sec-independent protein translocase protein TatA	0.0209043	0.000658478	0.000600433	0.00939852	0.00187572	0.00165088	0.00138674	0.000678385
K06871		0.0209043	0.00724326	0.0533184	0.0584797	0.0325124	0.0276148	0.0388287	0.0210299
K01056	peptidyl-tRNA hydrolase, PTH1 family [EC:3.1.1.29]	0.0209043	0.0125111	0.0229365	0.010592	0.021727	0.0207111	0.013014	0.0122109
K08884	serine/threonine protein kinase, bacterial [EC:2.7.11.1]	0.0207422	0.0226077	0.0449124	0.00537059	0.0171941	0.0121565	0.0057603	0.0137938
K04761	LysR family transcriptional regulator, hydrogen peroxide-inducible genes activator	0.0207422	0.0059263	0.00408294	0.00447549	0.0137552	0.0162087	0.0408555	0.00542708
K00937	polyphosphate kinase [EC:2.7.4.1]	0.0205802	0.0111941	0.0959491	0.00820506	0.0237591	0.00690369	0.00842711	0.00768836
K12373	hexosaminidase [EC:3.2.1.52]	0.0205802	0.0030729	0.00132095	0.0126805	0.00281357	0.0142576	0.00469358	0.00746223
K02914	large subunit ribosomal protein L34	0.0204181	0.00965768	0.0088864	0.0347596	0.0128174	0.0238628	0.0279481	0.0144722
K03601	exodeoxyribonuclease VII large subunit [EC:3.1.11.6]	0.0202561	0.00504833	0.0317028	0.00447549	0.0315745	0.0237127	0.00640033	0.015829
K00857	thymidine kinase [EC:2.7.1.21]	0.0202561	0.00175594	0.00168121	0.0070116	0.00531453	0.00645345	0.00330684	0.00452256
K01191	alpha-mannosidase [EC:3.2.1.24]	0.020094	0.00285341	0.00132095	0.012233	0.00875334	0.0129069	0.00490692	0.00610546
K06188	aquaporin Z	0.020094	0.00395087	0.00384277	0.00999526	0.00922227	0.0108058	0.012054	0.00542708
K04485	DNA repair protein RadA/Sms	0.020094	0.0116331	0.0465936	0.00730996	0.0237591	0.0231124	0.00917381	0.0153767
K03768	peptidyl-prolyl cis-trans isomerase B (cyclophilin B) [EC:5.2.1.8]	0.020094	0.0182179	0.0220959	0.0596732	0.0323561	0.0345185	0.0218678	0.0452256
K08191	MFS transporter, ACS family, hexuronate transporter	0.020094	0.0228272	0.00732528	0.0216315	0.00969119	0.0321172	0.0412822	0.0205777
K01119	2',3'-cyclic-nucleotide 2'-phosphodiesterase [EC:3.1.4.16]	0.020094	0.00285341	0.000960692	0.0158134	0.00250095	0.0106557	0.00522694	0.00474869
K01903	succinyl-CoA synthetase beta subunit [EC:6.2.1.5]	0.019932	0.0256806	0.05548	0.0344613	0.0115669	0.0132071	0.0145074	0.0291705
K02503	Hit-like protein involved in cell-cycle regulation	0.019932	0.00131696	0.01393	0.00596732	0.0114106	0.0100554	0.00277348	0.00633159
K00440	coenzyme F420 hydrogenase alpha subunit [EC:1.12.98.1]	0.019932	0.0708961	0.0219758	0.108008	0.0318872	0.0445738	0.0533361	0.108994
K01966	propionyl-CoA carboxylase beta chain [EC:6.4.1.3]	0.0197699	0.0184374	0.0626852	0.00462467	0.0403279	0.0369198	0.0124807	0.0321102
K03614	electron transport complex protein RnfD	0.0197699	0.00724326	0.0201745	0.0126805	0.0170377	0.0139575	0.0194143	0.00814062
K01588	5-(carboxyamino)imidazole ribonucleotide mutase [EC:5.4.99.18]	0.0196079	0.0327044	0.0409495	0.067729	0.0284483	0.0297159	0.0161075	0.026457
K00759	adenine phosphoribosyltransferase [EC:2.4.2.7]	0.0194458	0.00373138	0.0240173	0.0232725	0.0195387	0.0106557	0.00949383	0.0110803
K03694	ATP-dependent Clp protease ATP-binding subunit ClpA	0.0194458	0.00965768	0.0088864	0.0104428	0.00125048	0.0169591	0.0208011	0.00972351
K01142	exodeoxyribonuclease III [EC:3.1.11.2]	0.0192838	0.00438985	0.0290609	0.00686241	0.0218833	0.0175594	0.00704037	0.0119848
K03431	phosphoglucosamine mutase [EC:5.4.2.10]	0.0192838	0.0111941	0.0498359	0.00626568	0.0142242	0.0135072	0.00746706	0.0144722
K03501	glucose inhibited division protein B [EC:2.1.-.-]	0.0192838	0.00219493	0.0165719	0.00820506	0.034857	0.0216116	0.00128007	0.00994964
K06200	carbon starvation protein	0.0191217	0.00987717	0.0710912	0.00268529	0.00672131	0.00165088	0.00106672	0.00361805
K01179	endoglucanase [EC:3.2.1.4]	0.0191217	0.0173399	0.0287007	0.029389	0.153027	0.129069	0.0219745	0.0832152
K00443	coenzyme F420 hydrogenase gamma subunit [EC:1.12.98.1]	0.0191217	0.0544342	0.01393	0.068475	0.0246969	0.0379703	0.0409621	0.0915819
K07566	putative translation factor	0.0189597	0.00460935	0.00816588	0.0104428	0.0286047	0.0267143	0.00810709	0.0144722
K02015	iron complex transport system permease protein	0.0189597	0.0182179	0.0231767	0.0174544	0.00765917	0.0252135	0.0137607	0.019447
K09687	antibiotic transport system ATP-binding protein	0.0189597	0.0109746	0.13882	0.0061165	0.0264163	0.0153082	0.00714704	0.0122109
K02523	octaprenyl diphosphate synthase [EC:2.5.1.-]	0.0189597	0.000219493	0.000720519	0.0152167	0.0198513	0.015008	0.00181343	0.00904513
K03438	S-adenosyl-methyltransferase [EC:2.1.1.-]	0.0189597	0.00834072	0.0678489	0.0101444	0.0281357	0.0201108	0.00565363	0.0162812
K07024		0.0189597	0.00504833	0.0972701	0.00999526	0.0378269	0.022512	0.00842711	0.0167335
K06969	ribosomal RNA large subunit methyltransferase I [EC:2.1.1.-]	0.0187976	0.0100967	0.0752942	0.00686241	0.0457987	0.0319671	0.00821376	0.0226128
K00284	glutamate synthase (ferredoxin) [EC:1.4.7.1]	0.0187976	0.0120721	0.12501	0.00656405	0.0190698	0.0133571	0.00992052	0.0189948
K02936	large subunit ribosomal protein L7Ae	0.0187976	0.0305095	0.0121287	0.142321	0.0160999	0.0301661	0.0228279	0.0477131
K01520	dUTP pyrophosphatase [EC:3.6.1.23]	0.0187976	0.00285341	0.00864623	0.0101444	0.0081281	0.0105056	0.00373353	0.00429644
K14235	tRNA Trp	0.0187976	0.0276561	0.0187335	0.0250627	0.0198513	0.0214615	0.0208011	0.0196732
K02006	cobalt/nickel transport system ATP-binding protein	0.0187976	0.0190959	0.0697703	0.0158134	0.0565841	0.0316669	0.013654	0.0393463
K00558	DNA (cytosine-5-)-methyltransferase [EC:2.1.1.37]	0.0186356	0.0127306	0.0447923	0.00507222	0.0100038	0.011256	0.0102405	0.00633159
K07588	LAO/AO transport system kinase [EC:2.7.-.-]	0.0186356	0.0109746	0.00276199	0.0144707	0.00422036	0.013057	0.0158942	0.0072361
K00761	uracil phosphoribosyltransferase [EC:2.4.2.9]	0.0186356	0.014267	0.0285806	0.0435614	0.0150057	0.0099053	0.00800042	0.015829
K03529	chromosome segregation protein	0.0186356	0.0204128	0.100392	0.00999526	0.0881586	0.0745899	0.0102405	0.0499743
K00768	nicotinate-nucleotide--dimethylbenzimidazole phosphoribosyltransferase [EC:2.4.2.21]	0.0186356	0.0109746	0.0178929	0.0152167	0.00296988	0.00750401	0.00661368	0.00587933
K00945	cytidylate kinase [EC:2.7.4.14]	0.0184735	0.0105357	0.0248579	0.0198413	0.0200076	0.0288154	0.0184543	0.0260047
K03092	RNA polymerase sigma-54 factor	0.0184735	0.00395087	0.0118886	0.0140232	0.0331376	0.0306164	0.00810709	0.017638
K07216	hemerythrin	0.0184735	0.000658478	0.0533184	0.00313284	0.00640869	0	0.000213344	0
K02031	peptide/nickel transport system ATP-binding protein	0.0184735	0.0522393	0.0480346	0.0141724	0.0503317	0.0682865	0.0348818	0.10515
K01297	muramoyltetrapeptide carboxypeptidase [EC:3.4.17.13]	0.0184735	0.00219493	0.0168121	0.0111887	0.00547084	0.0133571	0.00277348	0.00474869
K05807	putative lipoprotein	0.0184735	0.00175594	0.000480346	0.0168577	0.0137552	0.0138074	0.0019201	0.00678385
K07391	magnesium chelatase family protein	0.0184735	0.00987717	0.0132095	0.010592	0.0207892	0.0241629	0.00448023	0.0162812
K03453	bile acid:Na+ symporter, BASS family	0.0184735	0.00417036	0.0542791	0.00551977	0.048456	0.0381204	0.00416022	0.0251002
K01626	3-deoxy-7-phosphoheptulonate synthase [EC:2.5.1.54]	0.0184735	0.00438985	0.0413098	0.00253611	0.0125048	0.0022512	0.00320017	0.00452256
K00991	2-C-methyl-D-erythritol 4-phosphate cytidylyltransferase [EC:2.7.7.60]	0.0184735	0.00680427	0.0213754	0.0182003	0.0160999	0.0166589	0.0155741	0.00972351
K02026	multiple sugar transport system permease protein	0.0183115	0.0327044	0.034705	0.0104428	0.0375143	0.0250634	0.018881	0.0515572
K02406	flagellin	0.0183115	0.00351188	0.0601633	0.00372957	0.0175067	0.00945506	0.00640033	0.0126632
K00248	butyryl-CoA dehydrogenase [EC:1.3.99.2]	0.0183115	0.00746275	0.0401089	0.00238693	0.0206329	0.011256	0.0076804	0.0142461
K12574	ribonuclease J [EC:3.1.-.-]	0.0181494	0.00987717	0.0551197	0.00492304	0.0170377	0.00810434	0.00608032	0.0110803
K00930	acetylglutamate/acetylaminoadipate kinase [EC:2.7.2.8 2.7.2.-]	0.0181494	0.00636529	0.0274998	0.00730996	0.0303241	0.0219117	0.00437356	0.0146983
K07791	anaerobic C4-dicarboxylate transporter DcuA	0.0181494	0.00877971	0.00156112	0.00850343	0.000625238	0.00870466	0.00640033	0.00565321
K03925	MraZ protein	0.0181494	0.00219493	0.0136899	0.0162609	0.0193824	0.00930498	0.00224012	0.00678385
K02028	polar amino acid transport system ATP-binding protein [EC:3.6.3.21]	0.0179874	0.0643114	0.0718117	0.0123822	0.0267289	0.0412721	0.0262414	0.0395724
K14441	ribosomal protein S12 methylthiotransferase [EC:2.-.-.-]	0.0179874	0.00702377	0.0294212	0.0128297	0.0375143	0.0352689	0.00533361	0.0174119
K02501	glutamine amidotransferase [EC:2.4.2.-]	0.0179874	0.00438985	0.0186134	0.0144707	0.0187572	0.0180096	0.0180276	0.0156028
K03234	elongation factor EF-2 [EC:3.6.5.3]	0.0179874	0.0724326	0.00324234	0.0741439	0.0165688	0.105356	0.0717904	0.152637
K00014	shikimate dehydrogenase [EC:1.1.1.25]	0.0179874	0.00197543	0.0367465	0.0143216	0.0237591	0.0136573	0.00480025	0.00610546
K03711	Fur family transcriptional regulator, ferric uptake regulator	0.0178253	0.00175594	0.0205348	0.00730996	0.00562715	0.00930498	0.000533361	0.00497482
K00528	ferredoxin--NADP+ reductase [EC:1.18.1.2]	0.0178253	0.0186569	0.0390281	0.00492304	0.0347007	0.0399214	0.0057603	0.0260047
K01595	phosphoenolpyruvate carboxylase [EC:4.1.1.31]	0.0178253	0.0149255	0.0176527	0.00358039	0.0162562	0.00570305	0.0038402	0.00474869
K00339	NADH dehydrogenase I subunit J [EC:1.6.5.3]	0.0178253	0.0353383	0.00456329	0.0186479	0.0359512	0.0343684	0.0330684	0.0203515
K01012	biotin synthetase [EC:2.8.1.6]	0.0178253	0.00658478	0.0787768	0.015515	0.0486123	0.0424727	0.00928049	0.0364066
K00655	1-acyl-sn-glycerol-3-phosphate acyltransferase [EC:2.3.1.51]	0.0176633	0.00131696	0.0452726	0.00805588	0.0268853	0.0220618	0.00341351	0.0128893
K04763	integrase/recombinase XerD	0.0176633	0.00285341	0.0338644	0.00671323	0.015631	0.0171092	0.00330684	0.00836674
K07056		0.0176633	0.00417036	0.0282203	0.00641487	0.0240717	0.0157584	0.00437356	0.0110803
K09142	hypothetical protein	0.0176633	0.0417036	0.0080458	0.113081	0.0186008	0.0525281	0.0476825	0.134999
K01956	carbamoyl-phosphate synthase small subunit [EC:6.3.5.5]	0.0176633	0.0122916	0.0512769	0.0150675	0.0325124	0.0334679	0.0114139	0.0278138
K11754	dihydrofolate synthase / folylpolyglutamate synthase [EC:6.3.2.12 6.3.2.17]	0.0176633	0.00241442	0.0356657	0.0061165	0.0315745	0.022362	0.00362686	0.0128893
K14222	tRNA Cys	0.0176633	0.0261196	0.0129693	0.0378925	0.0229775	0.0175594	0.0228279	0.0203515
K00426	cytochrome bd-I oxidase subunit II [EC:1.10.3.-]	0.0176633	0.00219493	0.0018013	0.00924934	0.000625238	0.00510273	0.00266681	0.00226128
K03584	DNA repair protein RecO (recombination protein O)	0.0175012	0.00197543	0.0202946	0.00939852	0.0171941	0.0123066	0.00213344	0.00429644
K01997	branched-chain amino acid transport system permease protein	0.0175012	0.0111941	0.0193339	0.00447549	0.00797179	0.00660353	0.00448023	0.0101758
K12942	aminobenzoyl-glutamate transport protein	0.0175012	0.000438985	0.0243776	0.00238693	0.000937858	0.00270145	0.000426689	0.0015829
K03149	thiamine biosynthesis ThiG	0.0175012	0.0061458	0.0378273	0.00805588	0.019695	0.0156084	0.0119473	0.00791449
K07082	UPF0755 protein	0.0173392	0.00109746	0.0196942	0.0110395	0.0292299	0.0189101	0.00352018	0.00904513
K11755	phosphoribosyl-ATP pyrophosphohydrolase / phosphoribosyl-AMP cyclohydrolase [EC:3.6.1.31 3.5.4.19]	0.0171771	0.00285341	0.0367465	0.0061165	0.00703393	0.00735393	0.00320017	0.00452256
K07271	lipopolysaccharide cholinephosphotransferase [EC:2.7.8.-]	0.0171771	0.00175594	0.000960692	0.0131281	0.00234464	0.0084045	0.00597365	0.00203515
K04072	acetaldehyde dehydrogenase / alcohol dehydrogenase [EC:1.2.1.10 1.1.1.1]	0.0170151	0.0283146	0.0297815	0.0101444	0.0362638	0.0297159	0.0161075	0.0291705
K02032	peptide/nickel transport system ATP-binding protein	0.016853	0.0401672	0.0518774	0.0149183	0.0381395	0.0526782	0.0167475	0.0535924
K03439	tRNA (guanine-N7-)-methyltransferase [EC:2.1.1.33]	0.016853	0.00285341	0.00516372	0.0104428	0.0232901	0.0171092	0.00362686	0.00836674
K00981	phosphatidate cytidylyltransferase [EC:2.7.7.41]	0.016853	0.00241442	0.0169322	0.00656405	0.017663	0.0163588	0.00266681	0.00655772
K02548	1,4-dihydroxy-2-naphthoate octaprenyltransferase [EC:2.5.1.74]	0.016853	0.00197543	0.00192138	0.0125314	0.00296988	0.00615329	0.0119473	0.00452256
K03775	FKBP-type peptidyl-prolyl cis-trans isomerase SlyD [EC:5.2.1.8]	0.016691	0.00856022	0.00252182	0.0393843	0.015631	0.0159085	0.0108806	0.0217083
K11752	diaminohydroxyphosphoribosylaminopyrimidine deaminase / 5-amino-6-(5-phosphoribosylamino)uracil reductase [EC:3.5.4.26 1.1.1.193]	0.016691	0.00373138	0.0359059	0.00880179	0.028292	0.01861	0.00234679	0.008819
K04773	protease IV [EC:3.4.21.-]	0.016691	0.00131696	0.000720519	0.00954771	0.0117232	0.0255136	0.00362686	0.00859287
K03242	translation initiation factor eIF-2 gamma subunit	0.016529	0.0482884	0.0109279	0.0868245	0.0159436	0.0600321	0.0480025	0.105602
K07118		0.016529	0.0223883	0.036146	0.00149183	0.0098475	0.00615329	0.0030935	0.00520095
K00325	NAD(P) transhydrogenase subunit beta [EC:1.6.1.2]	0.016529	0.0109746	0.0220959	0.00119346	0.0165688	0.00555297	0.00480025	0.00429644
K01790	dTDP-4-dehydrorhamnose 3,5-epimerase [EC:5.1.3.13]	0.016529	0.00351188	0.00384277	0.00954771	0.00765917	0.011256	0.00352018	0.00791449
K06076	long-chain fatty acid transport protein	0.016529	0.00219493	0.000720519	0.00910016	0.00781548	0.0111059	0.00320017	0.00429644
K00912	tetraacyldisaccharide 4'-kinase [EC:2.7.1.130]	0.016529	0.00395087	0.00960692	0.00924934	0.00547084	0.0133571	0.0110939	0.00542708
K07447	putative holliday junction resolvase [EC:3.1.-.-]	0.016529	0.00658478	0.0199344	0.00716078	0.0121921	0.0123066	0.00928049	0.00497482
K02907	large subunit ribosomal protein L30	0.0163669	0.0320459	0.0080458	0.0475894	0.0112543	0.035569	0.0542962	0.0438689
K02338	DNA polymerase III subunit beta [EC:2.7.7.7]	0.0162049	0.00373138	0.0357858	0.0110395	0.0350133	0.0288154	0.00448023	0.0119848
K01712	urocanate hydratase [EC:4.2.1.49]	0.0162049	0.0357773	0.0261789	0.00581813	0.00625238	0.01876	0.0178143	0.0260047
K00260	glutamate dehydrogenase [EC:1.4.1.2]	0.0162049	0.00263391	0.0276199	0.00134265	0.00140679	0.00105056	0.000640033	0.000904513
K07007		0.0162049	0.00263391	0.0623249	0.0102936	0.00890965	0.00930498	0.00832043	0.0124371
K03527	4-hydroxy-3-methylbut-2-enyl diphosphate reductase [EC:1.17.1.2]	0.0160428	0.0030729	0.0147706	0.00566895	0.0159436	0.0136573	0.00298682	0.008819
K01647	citrate synthase [EC:2.3.3.1]	0.0160428	0.00834072	0.0712113	0.00372957	0.0432978	0.0409719	0.00437356	0.0266831
K07054		0.0157187	0.0122916	0.00108078	0.0140232	0.00296988	0.0111059	0.00789375	0.00474869
K03330	glutamyl-tRNA(Gln) amidotransferase subunit E [EC:6.3.5.7]	0.0153946	0.0434596	0.0187335	0.050573	0.0109417	0.0169591	0.0193077	0.0345976
K02066	putative ABC transport system permease protein	0.0153946	0.00175594	0.0106877	0.00656405	0.0669005	0.044874	0.00437356	0.0241957
K02910	large subunit ribosomal protein L31e	0.0153946	0.0217298	0.00768554	0.123374	0.0126611	0.0184599	0.0152541	0.0373112
K03734	thiamine biosynthesis lipoprotein	0.0153946	0.00153645	0.0336242	0.00745915	0.00937858	0.00450241	0.0019201	0.00339192
K09952	hypothetical protein	0.0152326	0.000438985	0.000600433	0.0268529	0.0278231	0.0133571	0.00245346	0.00180903
K11928	sodium/proline symporter	0.0152326	0.00636529	0.0559603	0.00238693	0.0429851	0.0303162	0.00298682	0.0235173
K13525	transitional endoplasmic reticulum ATPase	0.0150705	0.0662868	0.0100873	0.0686241	0.032825	0.0678363	0.0734972	0.1454
K01212	levanase [EC:3.2.1.65]	0.0150705	0.00329239	0.000960692	0.00686241	0.00453298	0.00945506	0.0050136	0.00768836
K00549	5-methyltetrahydropteroyltriglutamate--homocysteine methyltransferase [EC:2.1.1.14]	0.0150705	0.0109746	0.0254583	0.00537059	0.0683073	0.0586814	0.00586697	0.0386679
K01421	putative membrane protein	0.0150705	0.0030729	0.150348	0.00447549	0.0154746	0.00135072	0.00266681	0.0072361
K10243	cellobiose transport system ATP-binding protein	0.0150705	0.013828	0.00900649	0.00417712	0.0109417	0.00930498	0.00736038	0.0203515
K00169	pyruvate ferredoxin oxidoreductase, alpha subunit [EC:1.2.7.1]	0.0150705	0.0559706	0.0103274	0.0716078	0.0273542	0.0655851	0.0594164	0.128215
K07027		0.0150705	0.00219493	0.00636459	0.0108904	0.0253222	0.0216116	0.0050136	0.0119848
K03648	uracil-DNA glycosylase [EC:3.2.2.-]	0.0149085	0.015584	0.0145305	0.0258086	0.0215707	0.0180096	0.00896047	0.0151506
K00287	dihydrofolate reductase [EC:1.5.1.3]	0.0149085	0.000438985	0.00732528	0.00253611	0.0112543	0.00735393	0.00373353	0.00226128
K02011	iron(III) transport system permease protein	0.0149085	0.0188764	0.0356657	0.00581813	0.00828441	0.00765409	0.00682702	0.00927126
K01995	branched-chain amino acid transport system ATP-binding protein	0.0149085	0.0182179	0.0272596	0.00596732	0.00906596	0.00795426	0.0057603	0.00994964
K01704	3-isopropylmalate/(R)-2-methylmalate dehydratase small subunit [EC:4.2.1.33 4.2.1.35]	0.0149085	0.016462	0.0195741	0.021184	0.028292	0.0360193	0.0172809	0.0303012
K03426	NAD+ diphosphatase [EC:3.6.1.22]	0.0149085	0.00373138	0.0375871	0.0119346	0.0289173	0.01861	0.0076804	0.0178641
K07334	proteic killer suppression protein	0.0149085	0.000219493	0.000600433	0.00268529	0.000468929	0.00330177	0.000533361	0.000452256
K02120	V-type H+-transporting ATPase subunit D [EC:3.6.3.14]	0.0147464	0.0342409	0.0156112	0.104577	0.0315745	0.0516276	0.0376553	0.072361
K00382	dihydrolipoamide dehydrogenase [EC:1.8.1.4]	0.0147464	0.0061458	0.00636459	0.0144707	0.00969119	0.0163588	0.0118406	0.0192209
K04518	prephenate dehydratase [EC:4.2.1.51]	0.0145844	0.00504833	0.000600433	0.0207364	0.0329813	0.0234125	0.0224012	0.0144722
K04076	Lon-like ATP-dependent protease [EC:3.4.21.-]	0.0145844	0.0507028	0.011168	0.0602699	0.0298551	0.0499767	0.051736	0.108089
K09810	lipoprotein-releasing system ATP-binding protein [EC:3.6.3.-]	0.0145844	0.00482884	0.00156112	0.00656405	0.0229775	0.0178596	0.00512027	0.0108542
K09760	DNA recombination protein RmuC	0.0144223	0.00460935	0.00780562	0.00999526	0.0101601	0.0177095	0.0158942	0.00949738
K01754	threonine dehydratase [EC:4.3.1.19]	0.0144223	0.00351188	0.0580018	0.00283448	0.0129737	0.00420225	0.00266681	0.00429644
K03210	preprotein translocase subunit YajC	0.0142603	0.00504833	0.00384277	0.0165593	0.00828441	0.00975522	0.00480025	0.00497482
K07491	putative transposase	0.0142603	0.0256806	0.0126091	0.0283448	0.0106291	0.0105056	0.0122673	0.0167335
K07011		0.0140982	0.00197543	0.0330238	0.019543	0.00453298	0.00900482	0.0038402	0.00633159
K06972		0.0140982	0.00702377	0.077696	0.00313284	0.00593976	0.00285153	0.00149341	0.00565321
K00616	transaldolase [EC:2.2.1.2]	0.0140982	0.00460935	0.0271396	0.00223774	0.0101601	0.00525281	0.00352018	0.00927126
K02036	phosphate transport system ATP-binding protein [EC:3.6.3.27]	0.0140982	0.0100967	0.0321832	0.00402794	0.0101601	0.00375201	0.00213344	0.00542708
K07496	putative transposase	0.0140982	0.0100967	0.0114082	0.013874	0.00359512	0.00180096	0.00352018	0.00293967
K02775	PTS system, galactitol-specific IIC component	0.0139362	0.00987717	0.00240173	0.017902	0.00687762	0.0135072	0.0174942	0.00565321
K00868	pyridoxine kinase [EC:2.7.1.35]	0.0139362	0.00724326	0.0325434	0.0123822	0.034857	0.0211613	0.00565363	0.0187686
K07301	inner membrane protein	0.0137741	0.00241442	0.0529582	0.00969689	0.0103164	0.00870466	0.00490692	0.00791449
K01989	putative ABC transport system substrate-binding protein	0.0137741	0.00109746	0.0682091	0.00104428	0.00531453	0.000600321	0.000106672	0.000452256
K06863	5-formaminoimidazole-4-carboxamide-1-(beta)-D-ribofuranosyl 5'-monophosphate synthetase [EC:6.3.4.-]	0.0136121	0.0421426	0.00900649	0.0927918	0.0206329	0.0396212	0.0395754	0.0879639
K03630	DNA repair protein RadC	0.0136121	0.00175594	0.00420303	0.0070116	0.00781548	0.00885474	0.00352018	0.00361805
K07238	zinc transporter, ZIP family	0.0136121	0.00943819	0.0365063	0.0114871	0.0207892	0.0231124	0.0147208	0.0146983
K03718	Lrp/AsnC family transcriptional regulator, regulator for asnA, asnC and gidA	0.0136121	0.000438985	0.000720519	0.0114871	0.00296988	0.00600321	0.00224012	0.00293967
K01224	arabinogalactan endo-1,4-beta-galactosidase [EC:3.2.1.89]	0.01345	0.00219493	0.0134497	0.010592	0.0295425	0.0270145	0.00405355	0.0101758
K00048	lactaldehyde reductase [EC:1.1.1.77]	0.01345	0.0173399	0.0528381	0.00313284	0.00765917	0.00960514	0.0076804	0.0149245
K00784	ribonuclease Z [EC:3.1.26.11]	0.01345	0.00373138	0.0274998	0.0101444	0.00468929	0.00570305	0.0050136	0.00293967
K03742	competence/damage-inducible protein CinA	0.01345	0.000219493	0.00552398	0.0111887	0.00187572	0.00420225	0.00202677	0.000904513
K04075	tRNA(Ile)-lysidine synthase [EC:6.3.4.-]	0.01345	0.00175594	0.0369866	0.0107412	0.0225086	0.0147079	0.00181343	0.0110803
K02866	large subunit ribosomal protein L10e	0.013288	0.0228272	0.00780562	0.108456	0.0140679	0.0181597	0.0151475	0.0309796
K01959	pyruvate carboxylase subunit A [EC:6.4.1.1]	0.013288	0.0342409	0.0080458	0.0590764	0.0139116	0.0352689	0.0334951	0.0658033
K09812	cell division transport system ATP-binding protein	0.013288	0.0243637	0.0339845	0.00686241	0.0264163	0.0277649	0.00789375	0.0260047
K01235	alpha-glucuronidase [EC:3.2.1.139]	0.013288	0.0030729	0.00204147	0.00850343	0.00359512	0.0139575	0.0069337	0.0113064
K00760	hypoxanthine phosphoribosyltransferase [EC:2.4.2.8]	0.013288	0.0030729	0.00852614	0.0101444	0.021727	0.0120064	0.00234679	0.00542708
K02669	twitching motility protein PilT	0.013288	0.0118526	0.0469538	0.00223774	0.0622112	0.0507271	0.00490692	0.0355021
K06881		0.013288	0.00131696	0.022216	0.0101444	0.0157873	0.0144077	0.00298682	0.00791449
K02877	large subunit ribosomal protein L15e	0.013288	0.0353383	0.00564407	0.102041	0.0231338	0.0483259	0.0401088	0.0897729
K04078	chaperonin GroES	0.0131259	0.0127306	0.00768554	0.0268529	0.0182882	0.0217616	0.0326417	0.0160551
K03744	LemA protein	0.0131259	0.00921869	0.00876632	0.0117855	0.0279794	0.0244631	0.0069337	0.0269093
K02869	large subunit ribosomal protein L12	0.0131259	0.0182179	0.00432311	0.0810063	0.0129737	0.0300161	0.0172809	0.0560798
K00748	lipid-A-disaccharide synthase [EC:2.4.1.182]	0.0131259	0.00263391	0.00732528	0.010592	0.0135989	0.0196605	0.00352018	0.00927126
K03118	sec-independent protein translocase protein TatC	0.0131259	0.00329239	0.00132095	0.00686241	0.00187572	0.00435233	0.00234679	0.00203515
K10726	replicative DNA helicase Mcm [EC:3.6.4.-]	0.0131259	0.0456545	0.00936675	0.0529599	0.0192261	0.0427729	0.0410688	0.0732655
K09797	hypothetical protein	0.0129639	0.00373138	0.00132095	0.00999526	0.00719024	0.0169591	0.00778707	0.00836674
K03602	exodeoxyribonuclease VII small subunit [EC:3.1.11.6]	0.0129639	0.00109746	0.00108078	0.00716078	0.00640869	0.00555297	0.00256013	0.00293967
K02517	lipid A biosynthesis lauroyl acyltransferase [EC:2.3.1.-]	0.0129639	0.00109746	0.0136899	0.0052214	0.0212581	0.0171092	0.00170676	0.0108542
K06925	UPF0079 ATP-binding protein	0.0129639	0.00197543	0.0183732	0.00716078	0.0139116	0.00870466	0.0030935	0.00587933
K03205	type IV secretion system protein VirD4	0.0129639	0.0125111	0.0238972	0.00358039	0.00672131	0.00570305	0.00288015	0.00587933
K03564	peroxiredoxin Q/BCP [EC:1.11.1.15]	0.0128018	0.0061458	0.0296614	0.0116363	0.006565	0.00750401	0.0153608	0.00859287
K00793	riboflavin synthase alpha chain [EC:2.5.1.9]	0.0128018	0.00636529	0.0183732	0.00820506	0.0132863	0.00960514	0.00224012	0.00678385
K01627	2-dehydro-3-deoxyphosphooctonate aldolase (KDO 8-P synthase) [EC:2.5.1.55]	0.0128018	0.00438985	0.011048	0.00447549	0.0115669	0.00630337	0.00565363	0.00452256
K00605	aminomethyltransferase [EC:2.1.2.10]	0.0128018	0.0182179	0.00564407	0.0126805	0.0159436	0.0213114	0.0148274	0.0131154
K01679	fumarate hydratase, class II [EC:4.2.1.2]	0.0128018	0.0397282	0.0284605	0.00581813	0.00687762	0.01876	0.013654	0.0314318
K03771	peptidyl-prolyl cis-trans isomerase SurA [EC:5.2.1.8]	0.0128018	0.00834072	0.00132095	0.0128297	0.0245406	0.0234125	0.0114139	0.0128893
K01438	acetylornithine deacetylase [EC:3.5.1.16]	0.0126398	0.000877971	0.000720519	0.00507222	0.000781548	0.00615329	0.00138674	0.0015829
K03045	DNA-directed RNA polymerase subunit B" [EC:2.7.7.6]	0.0126398	0.0553122	0.00612441	0.0674307	0.0167251	0.0576308	0.0489626	0.114647
K02978	small subunit ribosomal protein S27e	0.0126398	0.0177789	0.00540389	0.0608666	0.00844072	0.00750401	0.00906714	0.0239696
K01685	altronate hydrolase [EC:4.2.1.7]	0.0126398	0.00746275	0.0120087	0.00805588	0.0032825	0.011256	0.0125873	0.00565321
K07012		0.0126398	0.00153645	0.0467137	0.00313284	0.00593976	0.00015008	0.00117339	0.00361805
K02929	large subunit ribosomal protein L44e	0.0126398	0.0210713	0.00480346	0.0787686	0.0125048	0.0249133	0.0212278	0.0517834
K01682	aconitate hydratase 2 [EC:4.2.1.3]	0.0124777	0.000877971	0.0483949	0.00208856	0.00359512	0.000450241	0.000533361	0.000226128
K06153	undecaprenyl-diphosphatase [EC:3.6.1.27]	0.0124777	0.00921869	0.0100873	0.0132773	0.0254785	0.026114	0.00544028	0.0208038
K03470	ribonuclease HII [EC:3.1.26.4]	0.0124777	0.00658478	0.0216156	0.00328202	0.0209455	0.0162087	0.00661368	0.0101758
K03783	purine-nucleoside phosphorylase [EC:2.4.2.1]	0.0124777	0.00548732	0.0252182	0.0070116	0.00765917	0.0127568	0.0149341	0.00949738
K00554	tRNA (guanine-N1-)-methyltransferase [EC:2.1.1.31]	0.0124777	0.014706	0.00612441	0.0101444	0.0212581	0.0183098	0.0117339	0.0144722
K02687	ribosomal protein L11 methyltransferase [EC:2.1.1.-]	0.0124777	0.0030729	0.0241374	0.00910016	0.0254785	0.0231124	0.00298682	0.0165074
K09811	cell division transport system permease protein	0.0124777	0.00460935	0.0196942	0.00686241	0.0257911	0.0171092	0.00330684	0.0108542
K11069	spermidine/putrescine transport system substrate-binding protein	0.0124777	0.00241442	0.0181331	0.00343121	0.0015631	0.00810434	0.0019201	0.00407031
K00286	pyrroline-5-carboxylate reductase [EC:1.5.1.2]	0.0124777	0.00373138	0.0224562	0.00328202	0.0226649	0.0289655	0.00437356	0.0124371
K03402	transcriptional regulator of arginine metabolism	0.0123157	0.00175594	0.00816588	0.00686241	0.00406405	0.00585313	0.00256013	0.00316579
K02123	V-type H+-transporting ATPase subunit I [EC:3.6.3.14]	0.0123157	0.0434596	0.0247378	0.0680274	0.0686199	0.0667857	0.0481092	0.115099
K07388	hydrogenase expression/formation protein	0.0123157	0.0342409	0.0100873	0.0466943	0.0150057	0.0229623	0.0213344	0.044095
K01091	phosphoglycolate phosphatase [EC:3.1.3.18]	0.0123157	0.00131696	0.0359059	0.00850343	0.0173504	0.0114061	0.00149341	0.00610546
K01462	peptide deformylase [EC:3.5.1.88]	0.0123157	0.00373138	0.0212553	0.0052214	0.0150057	0.0123066	0.00480025	0.00949738
K01156	type III restriction enzyme [EC:3.1.21.5]	0.0123157	0.0208518	0.0165719	0.00656405	0.0171941	0.0342183	0.0038402	0.0203515
K03719	Lrp/AsnC family transcriptional regulator, leucine-responsive regulatory protein	0.0123157	0.00373138	0.0112881	0.0253611	0.00437667	0.0117063	0.00970717	0.00407031
K07052		0.0123157	0.00153645	0.0733729	0.00596732	0.0118795	0.00450241	0.00181343	0.00339192
K01632	fructose-6-phosphate phosphoketolase [EC:4.1.2.22]	0.0121536	0.00460935	0.0044432	0.0017902	0.0101601	0.00165088	0.0019201	0.00384418
K07139		0.0121536	0.00109746	0.0177728	0.00149183	0.0251658	0.0154583	0.00149341	0.00746223
K03047	DNA-directed RNA polymerase subunit D [EC:2.7.7.6]	0.0121536	0.0287535	0.00924666	0.0674307	0.00937858	0.0367697	0.0248546	0.0560798
K07023	putative hydrolases of HD superfamily	0.0121536	0.000438985	0.0399888	0.000596732	0.00406405	0.00255136	0.00149341	0.00361805
K02930	large subunit ribosomal protein L4e	0.0119916	0.0430206	0.00876632	0.0589273	0.0154746	0.0439735	0.0372286	0.0965567
K00075	UDP-N-acetylmuramate dehydrogenase [EC:1.1.1.158]	0.0119916	0.0030729	0.0212553	0.00328202	0.0215707	0.0148579	0.00426689	0.00768836
K02341	DNA polymerase III subunit delta' [EC:2.7.7.7]	0.0119916	0.00373138	0.0324234	0.00984607	0.0232901	0.0255136	0.0125873	0.0113064
K02121	V-type H+-transporting ATPase subunit E [EC:3.6.3.14]	0.0119916	0.031607	0.00996718	0.0801112	0.0318872	0.0402215	0.0286948	0.0628636
K06409	stage V sporulation protein B	0.0119916	0.00109746	0.0778161	0.00223774	0.00562715	0.00165088	0.000106672	0.0015829
K01735	3-dehydroquinate synthase [EC:4.2.3.4]	0.0118295	0.00263391	0.0302618	0.00596732	0.00672131	0.00630337	0.00437356	0.00429644
K01159	crossover junction endodeoxyribonuclease RuvC [EC:3.1.22.4]	0.0118295	0.00438985	0.00480346	0.00596732	0.015162	0.0127568	0.00458691	0.0072361
K02033	peptide/nickel transport system permease protein	0.0118295	0.0179984	0.0368666	0.0271513	0.0162562	0.0189101	0.0177076	0.0465824
K10036	glutamine transport system substrate-binding protein	0.0118295	0.0030729	0.0216156	0.00134265	0.000468929	0	0	0
K04042	bifunctional UDP-N-acetylglucosamine pyrophosphorylase / Glucosamine-1-phosphate N-acetyltransferase [EC:2.7.7.23 2.3.1.157]	0.0118295	0.0136085	0.0141702	0.0204381	0.00906596	0.00765409	0.00544028	0.00859287
K06167	PhnP protein	0.0118295	0.000438985	0.000600433	0.00716078	0.000937858	0.00435233	0.00149341	0.00248741
K01996	branched-chain amino acid transport system ATP-binding protein	0.0118295	0.0274366	0.0274998	0.00880179	0.0170377	0.0172592	0.0131207	0.0235173
K00788	thiamine-phosphate pyrophosphorylase [EC:2.5.1.3]	0.0116675	0.00153645	0.0451525	0.00775751	0.0103164	0.00675361	0.00394687	0.00271354
K06148	ATP-binding cassette, subfamily C, bacterial	0.0116675	0.00285341	0.0617245	0.00268529	0.00593976	0.00180096	0.00128007	0.00474869
K00243	hypothetical protein	0.0116675	0.00285341	0.0187335	0.00954771	0.0220397	0.0174093	0.0030935	0.0131154
K06997		0.0116675	0.00175594	0.00408294	0.0043263	0.0232901	0.0160586	0.00277348	0.0110803
K09800	hypothetical protein	0.0116675	0.00131696	0.0216156	0.00119346	0.000781548	0.00015008	0	0
K01778	diaminopimelate epimerase [EC:5.1.1.7]	0.0116675	0.016023	0.0290609	0.0252119	0.0146931	0.0231124	0.024748	0.0449995
K14226	tRNA His	0.0116675	0.0129501	0.0153711	0.00850343	0.00906596	0.00885474	0.00714704	0.0113064
K01609	indole-3-glycerol phosphate synthase [EC:4.1.1.48]	0.0115054	0.00812123	0.023657	0.013874	0.00609607	0.0106557	0.00661368	0.0149245
K09704	hypothetical protein	0.0113434	0.00219493	0.000600433	0.0070116	0.00250095	0.00480257	0.00160008	0.00271354
K02232	adenosylcobyric acid synthase [EC:6.3.5.10]	0.0113434	0.0166814	0.0325434	0.0322235	0.0134426	0.0234125	0.0218678	0.0404769
K00763	nicotinate phosphoribosyltransferase [EC:2.4.2.11]	0.0111814	0.00526783	0.0793772	0.00417712	0.0162562	0.00420225	0.00234679	0.00610546
K07088		0.0111814	0.00241442	0.0325434	0.0061165	0.01313	0.00570305	0.00362686	0.00407031
K02109	F-type H+-transporting ATPase subunit b [EC:3.6.3.14]	0.0111814	0.00504833	0.0181331	0.0223774	0.00828441	0.0156084	0.0151475	0.0072361
K05516	curved DNA-binding protein	0.0110193	0.00526783	0.00336242	0.0234217	0.00296988	0.0100554	0.0173876	0.0072361
K07582	hypothetical protein	0.0110193	0.0269976	0.00576415	0.082349	0.00906596	0.0246132	0.0169609	0.0431905
K03735	ethanolamine ammonia-lyase large subunit [EC:4.3.1.7]	0.0108573	0.00285341	0.0459931	0.000745915	0.000625238	0.000450241	0.00106672	0.000678385
K08307	membrane-bound lytic murein transglycosylase D [EC:3.2.1.-]	0.0108573	0.00197543	0.000720519	0.0052214	0.0115669	0.01876	0.00480025	0.00746223
K01493	dCMP deaminase [EC:3.5.4.12]	0.0108573	0.00373138	0.022216	0.0079067	0.0228212	0.0136573	0.00640033	0.00949738
K00940	nucleoside-diphosphate kinase [EC:2.7.4.6]	0.0106952	0.0208518	0.00468337	0.0516173	0.0253222	0.0387207	0.0238946	0.0619591
K07483	transposase	0.0106952	0.000658478	0.00636459	0.000298366	0.00343881	0.00015008	0.000426689	0.000678385
K14260	alanine-synthesizing transaminase [EC:2.6.1.66 2.6.1.2]	0.0106952	0.00965768	0.0479145	0.00343121	0.0129737	0.00390209	0.00213344	0.00678385
K02027	multiple sugar transport system substrate-binding protein	0.0106952	0.0179984	0.0443119	0.00447549	0.0540831	0.0534286	0.0240013	0.072361
K01499	methenyltetrahydromethanopterin cyclohydrolase [EC:3.5.4.27]	0.0106952	0.0381917	0.00588424	0.0956263	0.0228212	0.0633339	0.0560029	0.120979
K01879	glycyl-tRNA synthetase beta chain [EC:6.1.1.14]	0.0106952	0.00504833	0.0226964	0.00164101	0.00218833	0.00315169	0.00128007	0.00226128
K04564	superoxide dismutase, Fe-Mn family [EC:1.15.1.1]	0.0105332	0.00351188	0.00204147	0.00626568	0.00797179	0.0117063	0.0038402	0.00949738
K00104	glycolate oxidase [EC:1.1.3.15]	0.0105332	0.00153645	0.0175326	0.000596732	0.000937858	0.000450241	0.000533361	0.00203515
K08659	dipeptidase [EC:3.4.-.-]	0.0105332	0.00548732	0.0126091	0.00134265	0.0106291	0.00330177	0.00266681	0.00135677
K03312	glutamate:Na+ symporter, ESS family	0.0105332	0.000658478	0.0200544	0.000298366	0.00109417	0	0.000106672	0.000226128
K03704	cold shock protein (beta-ribbon, CspA family)	0.0105332	0.00943819	0.0218557	0.00999526	0.00859703	0.00480257	0.00458691	0.00587933
K02238	competence protein ComEC	0.0105332	0.00219493	0.00984709	0.00596732	0.0400153	0.0381204	0.0019201	0.0178641
K11753	riboflavin kinase / FMN adenylyltransferase [EC:2.7.1.26 2.7.7.2]	0.0103711	0.00131696	0.0213754	0.00566895	0.0204766	0.0159085	0.00170676	0.010628
K03237	translation initiation factor eIF-2 alpha subunit	0.0103711	0.0399477	0.0070851	0.0716078	0.019695	0.0387207	0.0441623	0.0965567
K03041	DNA-directed RNA polymerase subunit A' [EC:2.7.7.6]	0.0103711	0.0561901	0.0088864	0.052214	0.0246969	0.0775915	0.0679502	0.139747
K03091	RNA polymerase sporulation-specific sigma factor	0.0103711	0.0103162	0.0701305	0.0126805	0.0140679	0.00495265	0.00533361	0.00768836
K02588	nitrogenase iron protein NifH [EC:1.18.6.1]	0.0102091	0.0193154	0.0132095	0.0061165	0.0389211	0.0258138	0.00661368	0.0178641
K06920	queuosine biosynthesis protein QueC	0.0102091	0.00417036	0.00456329	0.0161118	0.0157873	0.0177095	0.00874712	0.0153767
K03613	electron transport complex protein RnfE	0.0102091	0.0158035	0.0153711	0.00895098	0.0190698	0.0100554	0.0172809	0.00633159
K02119	V-type H+-transporting ATPase subunit C [EC:3.6.3.14]	0.0102091	0.0296315	0.00900649	0.0648946	0.0192261	0.0436734	0.0406421	0.0850242
K07030		0.0102091	0.0133891	0.0557201	0.00447549	0.0103164	0.0114061	0.00405355	0.00791449
K11358	aspartate aminotransferase [EC:2.6.1.1]	0.0102091	0.000219493	0.0431111	0.000895098	0.00515822	0.000900482	0.000746706	0.000904513
K10947	PadR family transcriptional regulator, regulatory protein PadR	0.0102091	0.000658478	0.000600433	0.00656405	0.00109417	0.00315169	0.000746706	0.00248741
K00848	rhamnulokinase [EC:2.7.1.5]	0.0102091	0.00329239	0.00420303	0.00358039	0.00281357	0.00780418	0.00362686	0.00407031
K03581	exodeoxyribonuclease V alpha subunit [EC:3.1.11.5]	0.0102091	0.00526783	0.0642463	0.00268529	0.0739344	0.0445738	0.00298682	0.0262309
K00864	glycerol kinase [EC:2.7.1.30]	0.0102091	0.0230467	0.0488752	0.0043263	0.0129737	0.0189101	0.0156808	0.0239696
K02834	ribosome-binding factor A	0.0102091	0.00175594	0.00420303	0.00730996	0.00828441	0.00645345	0.00266681	0.00361805
K00858	NAD+ kinase [EC:2.7.1.23]	0.0102091	0.00504833	0.0192138	0.0141724	0.0257911	0.024313	0.0235746	0.0219344
K01488	adenosine deaminase [EC:3.5.4.4]	0.010047	0.000658478	0.0268994	0.00119346	0.00390774	0.00165088	0.000426689	0.000904513
K01736	chorismate synthase [EC:4.2.3.5]	0.010047	0.00636529	0.0259387	0.00581813	0.0153183	0.015008	0.00586697	0.0128893
K00956	sulfate adenylyltransferase subunit 1 [EC:2.7.7.4]	0.010047	0.00395087	0.0414298	0.00149183	0.0431414	0.0277649	0.00202677	0.0226128
K03816	xanthine phosphoribosyltransferase [EC:2.4.2.22]	0.00988496	0.00153645	0.018013	0.0052214	0.0186008	0.0126067	0.00128007	0.00746223
K02549	O-succinylbenzoate synthase [EC:4.2.1.113]	0.00988496	0.00109746	0.00132095	0.00805588	0.00109417	0.00450241	0.00288015	0.00203515
K01251	adenosylhomocysteinase [EC:3.3.1.1]	0.00988496	0.0575071	0.0168121	0.0389367	0.0781548	0.122916	0.0456557	0.134772
K00969	nicotinate-nucleotide adenylyltransferase [EC:2.7.7.18]	0.00988496	0.00241442	0.0134497	0.0052214	0.0186008	0.0099053	0.00181343	0.00271354
K01537	Ca2+-transporting ATPase [EC:3.6.3.8]	0.00988496	0.0212908	0.0241374	0.00328202	0.0081281	0.0388708	0.0311483	0.0303012
K02885	large subunit ribosomal protein L19e	0.00988496	0.0263391	0.00480346	0.0601207	0.0148494	0.0334679	0.0268814	0.0732655
K06610	MFS transporter, SP family, inositol transporter	0.00988496	0.00965768	0.0080458	0.00835424	0.00218833	0.0109559	0.0117339	0.00655772
K00203	formylmethanofuran dehydrogenase subunit D [EC:1.2.99.5]	0.00988496	0.0296315	0.00660476	0.035058	0.0112543	0.0358692	0.0301882	0.0648988
K00259	alanine dehydrogenase [EC:1.4.1.1]	0.00988496	0.00373138	0.00144104	0.0070116	0.00250095	0.0084045	0.00544028	0.00474869
K00634	phosphate butyryltransferase [EC:2.3.1.19]	0.00972291	0.00175594	0.000480346	0.00775751	0.00312619	0.00930498	0.00597365	0.008819
K11600	exosome complex component RRP41	0.00972291	0.0291925	0.00276199	0.0361023	0.0115669	0.0240128	0.0233612	0.0565321
K06173	tRNA pseudouridine synthase A [EC:5.4.99.12]	0.00972291	0.0059263	0.042991	0.0107412	0.0257911	0.0178596	0.00618699	0.0151506
K03124	transcription initiation factor TFIIB	0.00972291	0.0417036	0.00696502	0.0648946	0.0206329	0.0537287	0.0573897	0.0890945
K03550	holliday junction DNA helicase RuvA	0.00972291	0.00263391	0.0159715	0.0043263	0.00750286	0.00585313	0.00181343	0.00293967
K09861	hypothetical protein	0.00972291	0.00109746	0.0216156	0.00164101	0.00609607	0.00015008	0.000213344	0.00271354
K00335	NADH dehydrogenase I subunit F [EC:1.6.5.3]	0.00972291	0.0399477	0.0229365	0.00730996	0.0425162	0.0631838	0.026348	0.0676123
K02071	D-methionine transport system ATP-binding protein	0.00956086	0.00768224	0.0195741	0.00193938	0.0128174	0.0108058	0.0038402	0.00904513
K10109	maltose/maltodextrin transport system permease protein	0.00956086	0.00241442	0.0353054	0.00208856	0.00906596	0.00300161	0.00149341	0.00384418
K03111	single-strand DNA-binding protein	0.00956086	0.00504833	0.0129693	0.00581813	0.0248532	0.0109559	0.00298682	0.0104019
K03699	putative hemolysin	0.00939882	0.0184374	0.01393	0.0135756	0.015631	0.0133571	0.0162142	0.0366328
K11072	spermidine/putrescine transport system ATP-binding protein [EC:3.6.3.31]	0.00939882	0.013828	0.0425106	0.00462467	0.00625238	0.00945506	0.00490692	0.0115325
K02034	peptide/nickel transport system permease protein	0.00939882	0.0129501	0.0343447	0.0079067	0.0279794	0.0354189	0.00917381	0.0314318
K01269	aminopeptidase [EC:3.4.11.-]	0.00939882	0.00109746	0.0383076	0.00149183	0.0331376	0.0162087	0.000746706	0.00904513
K02438	glycogen operon protein GlgX [EC:3.2.1.-]	0.00939882	0.00658478	0.0584821	0.00223774	0.0146931	0.00780418	0.00949383	0.0117587
K07005		0.00939882	0.0291925	0.00348251	0.0604191	0.0100038	0.0304663	0.00992052	0.0135677
K07106	N-acetylmuramic acid 6-phosphate etherase [EC:4.2.-.-]	0.00939882	0.00109746	0.00516372	0.00283448	0.0015631	0.00630337	0.00117339	0.00203515
K01207	beta-N-acetylhexosaminidase [EC:3.2.1.52]	0.00939882	0.00329239	0.00456329	0.00716078	0.0334503	0.0288154	0.00426689	0.019447
K07258	D-alanyl-D-alanine carboxypeptidase (penicillin-binding protein 5/6) [EC:3.4.16.4]	0.00939882	0.000438985	0.0299015	0.0043263	0.0032825	0.00360193	0.00202677	0.00384418
K02823	dihydroorotate dehydrogenase electron transfer subunit	0.00939882	0.00351188	0.0151309	0.00760833	0.00890965	0.00570305	0.0030935	0.00610546
K03536	ribonuclease P protein component [EC:3.1.26.5]	0.00939882	0.000877971	0.0105676	0.00313284	0.0032825	0.00285153	0.00149341	0.00271354
K05794	tellurite resistance protein TerC	0.00923677	0.00351188	0.00324234	0.00984607	0.00406405	0.00510273	0.00288015	0.00316579
K01104	protein-tyrosine phosphatase [EC:3.1.3.48]	0.00923677	0.00263391	0.0196942	0.00283448	0.0403279	0.0229623	0.00224012	0.015829
K01752	L-serine dehydratase [EC:4.3.1.17]	0.00923677	0.0136085	0.0140501	0.00298366	0.00750286	0.00585313	0.00672035	0.00972351
K00998	phosphatidylserine synthase [EC:2.7.8.8]	0.00923677	0.00175594	0.015251	0.00507222	0.0121921	0.0135072	0.00480025	0.00655772
K06113	arabinan endo-1,5-alpha-L-arabinosidase [EC:3.2.1.99]	0.00923677	0.000658478	0.000840606	0.00686241	0.000625238	0.00525281	0.00170676	0.00226128
K03525	type III pantothenate kinase [EC:2.7.1.33]	0.00907472	0.00197543	0.0329037	0.00253611	0.0098475	0.00795426	0.00138674	0.00361805
K02921	large subunit ribosomal protein L37Ae	0.00907472	0.0136085	0.0036026	0.0698176	0.00562715	0.0207111	0.0102405	0.0251002
K06187	recombination protein RecR	0.00907472	0.00241442	0.0120087	0.00358039	0.0103164	0.0106557	0.00256013	0.00587933
K01818	L-fucose isomerase [EC:5.3.1.25]	0.00907472	0.0197543	0.00228164	0.00730996	0.00734655	0.015008	0.0157875	0.0135677
K00950	2-amino-4-hydroxy-6-hydroxymethyldihydropteridine diphosphokinase [EC:2.7.6.3]	0.00907472	0.000219493	0.00204147	0.00402794	0.00375143	0.00435233	0.000320017	0.00135677
K03770	peptidyl-prolyl cis-trans isomerase D [EC:5.2.1.8]	0.00907472	0.00131696	0.000600433	0.0070116	0.0382959	0.0285153	0.00224012	0.0151506
K06213	magnesium transporter	0.00907472	0.00482884	0.011168	0.000895098	0.00234464	0.00555297	0.00298682	0.00768836
K03177	tRNA pseudouridine synthase B [EC:5.4.99.12]	0.00907472	0.0103162	0.019454	0.022825	0.0248532	0.0246132	0.0128007	0.0248741
K03575	A/G-specific adenine glycosylase [EC:3.2.2.-]	0.00907472	0.00329239	0.00720519	0.00417712	0.00703393	0.0103555	0.00277348	0.00520095
K03166	DNA topoisomerase VI subunit A [EC:5.99.1.3]	0.00907472	0.0384112	0.00732528	0.0699668	0.0159436	0.0427729	0.0446957	0.0782404
K02551	2-succinyl-5-enolpyruvyl-6-hydroxy-3-cyclohexene-1-carboxylate synthase [EC:2.2.1.9]	0.00891267	0	0.000600433	0.00551977	0.00171941	0.00600321	0.00213344	0.000904513
K00782	hypothetical protein	0.00891267	0.000658478	0.000960692	0.00835424	0.00422036	0.00555297	0.00298682	0.00180903
K01713	prephenate dehydratase [EC:4.2.1.51]	0.00891267	0.000438985	0.000120087	0.00462467	0.00234464	0.00540289	0.00224012	0.00316579
K04096	DNA processing protein	0.00891267	0.00241442	0.0044432	0.00343121	0.0121921	0.0109559	0.00160008	0.00633159
K03570	rod shape-determining protein MreC	0.00891267	0.000877971	0.00576415	0.00581813	0.0128174	0.0136573	0.00213344	0.00497482
K02008	cobalt/nickel transport system permease protein	0.00891267	0.0158035	0.0324234	0.0262562	0.0448609	0.0174093	0.0124807	0.0341454
K00954	pantetheine-phosphate adenylyltransferase [EC:2.7.7.3]	0.00891267	0.00263391	0.0162117	0.00551977	0.00500191	0.00480257	0.00181343	0.00429644
K02073	D-methionine transport system substrate-binding protein	0.00891267	0.00263391	0.0159715	0.0017902	0.0234464	0.0121565	0.00149341	0.00814062
K08641	D-alanyl-D-alanine dipeptidase [EC:3.4.13.-]	0.00891267	0.00636529	0.0102074	0.00596732	0.0164125	0.0126067	0.00789375	0.00836674
K01480	agmatinase [EC:3.5.3.11]	0.00875062	0.00219493	0.0129693	0.000447549	0.00234464	0.000750401	0.00117339	0.00293967
K03390	heterodisulfide reductase subunit C [EC:1.8.98.1]	0.00875062	0.0263391	0.00852614	0.0543026	0.0142242	0.029866	0.0302949	0.0786926
K01998	branched-chain amino acid transport system permease protein	0.00875062	0.00504833	0.0112881	0.00298366	0.00453298	0.00330177	0.00234679	0.00520095
K13942	5,10-methenyltetrahydromethanopterin hydrogenase [EC:1.12.98.2]	0.00875062	0.0770419	0.0088864	0.204679	0.0251658	0.0909487	0.0875779	0.188591
K02188	cobalamin biosynthesis protein CbiD	0.00875062	0.0059263	0.0157313	0.0114871	0.00140679	0.00705377	0.00394687	0.00271354
K02217	ferritin [EC:1.16.3.1]	0.00875062	0.0114136	0.00936675	0.0295382	0.0100038	0.0192103	0.0209078	0.0463563
K03420	proteasome regulatory subunit	0.00875062	0.0406062	0.00696502	0.0659389	0.0175067	0.0423226	0.038402	0.0870594
K03574	7,8-dihydro-8-oxoguanine triphosphatase [EC:3.6.1.-]	0.00858857	0.00263391	0.00648467	0.00626568	0.0187572	0.015008	0.00245346	0.0124371
K02991	small subunit ribosomal protein S6e	0.00858857	0.0109746	0.0036026	0.0720554	0.00719024	0.0120064	0.00981385	0.026457
K01961	acetyl-CoA carboxylase, biotin carboxylase subunit [EC:6.4.1.2 6.3.4.14]	0.00858857	0.00921869	0.0426307	0.00283448	0.00844072	0.00825442	0.00245346	0.00316579
K10773	endonuclease III [EC:4.2.99.18]	0.00858857	0.0166814	0.0234169	0.0202889	0.0276668	0.0180096	0.012374	0.0275876
K01295	glutamate carboxypeptidase [EC:3.4.17.11]	0.00842652	0.000438985	0.0141702	0.000447549	0.000312619	0	0	0
K03274	ADP-L-glycero-D-manno-heptose 6-epimerase [EC:5.1.3.20]	0.00842652	0.00680427	0.0266592	0.00149183	0.00015631	0.000300161	0.000320017	0.000226128
K01709	CDP-glucose 4,6-dehydratase [EC:4.2.1.45]	0.00842652	0.0838462	0.00588424	0.00686241	0.00015631	0.00180096	0.00405355	0.00203515
K00003	homoserine dehydrogenase [EC:1.1.1.3]	0.00842652	0.0100967	0.0303819	0.00641487	0.0375143	0.039321	0.00810709	0.0357283
K06872		0.00842652	0.000658478	0.0144104	0.000447549	0.0126611	0.00690369	0.000426689	0.00316579
K09973	hypothetical protein	0.00842652	0.000219493	0.000240173	0.00537059	0.0015631	0.00345185	0.000746706	0.000678385
K00578	tetrahydromethanopterin S-methyltransferase subunit B [EC:2.1.1.86]	0.00842652	0.0208518	0.00864623	0.0268529	0.00515822	0.00675361	0.00544028	0.00949738
K02361	isochorismate synthase [EC:5.4.4.2]	0.00842652	0.000877971	0.000240173	0.00372957	0.000468929	0.00330177	0.00096005	0.00135677
K00029	malate dehydrogenase (oxaloacetate-decarboxylating)(NADP+) [EC:1.1.1.40]	0.00826448	0.0127306	0.00756545	0.00596732	0.0583035	0.0735393	0.0107739	0.0456779
K01428	urease subunit alpha [EC:3.5.1.5]	0.00826448	0.00153645	0.00252182	0	0.000781548	0.00015008	0	0.000226128
K03167	DNA topoisomerase VI subunit B [EC:5.99.1.3]	0.00826448	0.0254612	0.00552398	0.0495287	0.0114106	0.0286653	0.0293349	0.0483914
K03671	thioredoxin 1	0.00826448	0.00460935	0.0261789	0.00223774	0.0193824	0.0115562	0.00362686	0.00927126
K04802	proliferating cell nuclear antigen	0.00826448	0.0215103	0.00528381	0.0829457	0.00797179	0.0250634	0.0213344	0.0384418
K01077	alkaline phosphatase [EC:3.1.3.1]	0.00810243	0.000877971	0.0145305	0	0.00672131	0.000300161	0.00106672	0
K02437	glycine cleavage system H protein	0.00810243	0.00197543	0.00036026	0.0119346	0.00234464	0.00645345	0.00416022	0.00135677
K02407	flagellar hook-associated protein 2	0.00810243	0.000438985	0.0877832	0.00164101	0.00719024	0.00195104	0.000746706	0.00384418
K03811	nicotinamide mononucleotide transporter	0.00810243	0.000219493	0.000480346	0.00372957	0.00109417	0.00255136	0.00160008	0.00135677
K02924	large subunit ribosomal protein L39e	0.00810243	0.0204128	0.00456329	0.0645962	0.00515822	0.0156084	0.0165342	0.0404769
K00796	dihydropteroate synthase [EC:2.5.1.15]	0.00810243	0.00351188	0.00480346	0.00999526	0.0204766	0.0142576	0.00298682	0.00678385
K10914	CRP/FNR family transcriptional regulator, cyclic AMP receptor protein	0.00810243	0.000658478	0.00600433	0.000447549	0.01313	0.00660353	0.000426689	0.00271354
K02984	small subunit ribosomal protein S3Ae	0.00810243	0.0210713	0.00324234	0.0732488	0.0157873	0.0285153	0.025708	0.0572104
K00577	tetrahydromethanopterin S-methyltransferase subunit A [EC:2.1.1.86]	0.00794038	0.0368748	0.00576415	0.0634027	0.0251658	0.0465249	0.050776	0.107185
K00919	4-diphosphocytidyl-2-C-methyl-D-erythritol kinase [EC:2.7.1.148]	0.00794038	0.00219493	0.0290609	0.00387876	0.0104727	0.00945506	0.00170676	0.00610546
K01085	glucose-1-phosphatase [EC:3.1.3.10]	0.00794038	0.00153645	0.000720519	0.00760833	0.00109417	0.00540289	0.00256013	0.00248741
K03458	nucleobase:cation symporter-2, NCS2 family	0.00794038	0.00153645	0.0505564	0.00149183	0.0323561	0.0171092	0.000853378	0.00949738
K00978	glucose-1-phosphate cytidylyltransferase [EC:2.7.7.33]	0.00794038	0.0195349	0.00192138	0.017156	0.00125048	0.00375201	0.00394687	0.00293967
K07173	S-ribosylhomocysteine lyase [EC:4.4.1.21]	0.00794038	0.00395087	0.0160916	0.0149183	0.00828441	0.00675361	0.00661368	0.00565321
K11921	LysR family transcriptional regulator	0.00794038	0.000877971	0.00600433	0.00372957	0.000468929	0.00165088	0.00117339	0.0015829
K01809	mannose-6-phosphate isomerase [EC:5.3.1.8]	0.00794038	0.00197543	0.00372268	0.00447549	0.00343881	0.00690369	0.00170676	0.00316579
K03300	citrate-Mg2+:H+ or citrate-Ca2+:H+ symporter, CitMHS family	0.00794038	0.000658478	0.0128493	0.000298366	0	0	0	0
K03549	KUP system potassium uptake protein	0.00794038	0.00987717	0.0126091	0.00283448	0.0101601	0.00120064	0.00160008	0.00203515
K02400	flagellar biosynthesis protein FlhA	0.00794038	0.00219493	0.0336242	0.00223774	0.00281357	0.00300161	0.00266681	0.00859287
K00965	UDPglucose--hexose-1-phosphate uridylyltransferase [EC:2.7.7.12]	0.00777833	0.00460935	0.0385478	0.000596732	0.00859703	0.00360193	0.00234679	0.00339192
K06177	ribosomal large subunit pseudouridine synthase A [EC:5.4.99.12]	0.00777833	0	0.000720519	0.00537059	0.000625238	0.00195104	0.00117339	0.00180903
K03705	heat-inducible transcriptional repressor	0.00777833	0.00329239	0.0300216	0.00208856	0.00750286	0.00285153	0.0019201	0.00474869
K04483	DNA repair protein RadA	0.00777833	0.0377527	0.00348251	0.0681766	0.0134426	0.043073	0.039042	0.0888684
K00018	glycerate dehydrogenase [EC:1.1.1.29]	0.00777833	0.000219493	0.00036026	0.00343121	0.000781548	0.00285153	0.00117339	0.000226128
K11068	hemolysin III	0.00761628	0.00153645	0.00168121	0.0079067	0.00515822	0.00405217	0.00266681	0.00226128
K00111	glycerol-3-phosphate dehydrogenase [EC:1.1.5.3]	0.00761628	0.00153645	0.0425106	0.00119346	0.00390774	0.000900482	0.00096005	0.00248741
K01039	glutaconate CoA-transferase, subunit A [EC:2.8.3.12]	0.00761628	0.000219493	0.00948683	0.00104428	0.000468929	0	0	0
K09761	ribosomal RNA small subunit methyltransferase E [EC:2.1.1.-]	0.00761628	0.00131696	0.0140501	0.00537059	0.0148494	0.0117063	0.00160008	0.00610546
K03978	GTP-binding protein	0.00761628	0.00351188	0.0062445	0.00939852	0.0120358	0.0147079	0.00618699	0.00791449
K10254	myosin-crossreactive antigen	0.00761628	0.0254612	0.00792571	0.00447549	0.0129737	0.00255136	0.00448023	0.00520095
K01607	4-carboxymuconolactone decarboxylase [EC:4.1.1.44]	0.00761628	0.00285341	0.00864623	0.00238693	0.00515822	0.000600321	0.000533361	0.00113064
K00595	precorrin-6Y C5,15-methyltransferase / precorrin-8W decarboxylase [EC:2.1.1.132 1.-.-.-]	0.00761628	0.00197543	0.0391482	0.0111887	0.00719024	0.00525281	0.0050136	0.010628
K01835	phosphoglucomutase [EC:5.4.2.2]	0.00761628	0.00197543	0.00420303	0.000596732	0.00703393	0.00135072	0.00170676	0.00293967
K01531	Mg2+-importing ATPase [EC:3.6.3.2]	0.00761628	0.00109746	0.0105676	0.000298366	0.00109417	0.000300161	0.000426689	0.00135677
K07576	metallo-beta-lactamase family protein	0.00761628	0.00219493	0.054159	0.00164101	0.00312619	0.00165088	0.00170676	0.00226128
K13812	bifunctional enzyme Fae/Hps [EC:4.3.-.- 4.1.2.43]	0.00745423	0.0340214	0.0036026	0.0608666	0.0234464	0.0462247	0.0483225	0.0979135
K00172	pyruvate ferredoxin oxidoreductase, gamma subunit [EC:1.2.7.1]	0.00745423	0.0133891	0.00480346	0.0607175	0.011098	0.0114061	0.0151475	0.0359544
K07041		0.00745423	0.0370943	0.00552398	0.0364006	0.0146931	0.0408218	0.0441623	0.0897729
K03421	methyl-coenzyme M reductase subunit C	0.00745423	0.0219493	0.00840606	0.0340137	0.00890965	0.0192103	0.0178143	0.0377634
K03778	D-lactate dehydrogenase [EC:1.1.1.28]	0.00745423	0.00548732	0.0106877	0.000895098	0.00187572	0.00420225	0.00181343	0.00316579
K01643	citrate lyase subunit alpha / citrate CoA-transferase [EC:4.1.3.6 2.8.3.10]	0.00745423	0.00197543	0.0105676	0.00193938	0.000468929	0.00105056	0.00128007	0.000904513
K01599	uroporphyrinogen decarboxylase [EC:4.1.1.37]	0.00745423	0.000219493	0.000600433	0.00462467	0.00109417	0.0022512	0.00106672	0.00180903
K02010	iron(III) transport system ATP-binding protein [EC:3.6.3.30]	0.00729218	0.0362163	0.0226964	0.00417712	0.00593976	0.0163588	0.0121606	0.0230651
K02007	cobalt/nickel transport system permease protein	0.00729218	0.0269976	0.00660476	0.0559436	0.0184445	0.0469751	0.0469358	0.0985919
K00941	hydroxymethylpyrimidine/phosphomethylpyrimidine kinase [EC:2.7.1.49 2.7.4.7]	0.00729218	0.00460935	0.0252182	0.0107412	0.0207892	0.0139575	0.00906714	0.0117587
K03524	BirA family transcriptional regulator, biotin operon repressor / biotin-[acetyl-CoA-carboxylase] ligase [EC:6.3.4.15]	0.00729218	0.000658478	0.0279802	0.00238693	0.00781548	0.00780418	0.00234679	0.00407031
K04720	threonine-phosphate decarboxylase [EC:4.1.1.81]	0.00729218	0.00109746	0.0254583	0.00507222	0.00312619	0.00405217	0.000853378	0.00203515
K00882	1-phosphofructokinase [EC:2.7.1.56]	0.00729218	0.00504833	0.0270195	0.00253611	0.0140679	0.00945506	0.00149341	0.00610546
K05810	conserved hypothetical protein	0.00729218	0.000438985	0.0307421	0.00223774	0.00140679	0.00285153	0.00106672	0.000904513
K02987	small subunit ribosomal protein S4e	0.00729218	0.0215103	0.00552398	0.0292399	0.00515822	0.0235626	0.0152541	0.0445473
K02322	DNA polymerase II large subunit [EC:2.7.7.7]	0.00713014	0.0219493	0.0044432	0.0268529	0.00922227	0.031817	0.0293349	0.059924
K07259	D-alanyl-D-alanine carboxypeptidase / D-alanyl-D-alanine-endopeptidase (penicillin-binding protein 4) [EC:3.4.16.4 3.4.99.-]	0.00713014	0.000877971	0.00036026	0.00462467	0.0098475	0.0147079	0.00170676	0.00452256
K00783	hypothetical protein	0.00713014	0.000438985	0.0158514	0.00283448	0.0159436	0.0084045	0.00202677	0.00361805
K00580	tetrahydromethanopterin S-methyltransferase subunit D [EC:2.1.1.86]	0.00713014	0.029412	0.00756545	0.0241676	0.01313	0.042923	0.0347752	0.0911297
K06902	MFS transporter, UMF1 family	0.00713014	0.00548732	0.0213754	0.00283448	0.0109417	0.000300161	0.00096005	0.00113064
K00657	diamine N-acetyltransferase [EC:2.3.1.57]	0.00713014	0.0204128	0.00240173	0.00656405	0.019695	0.0156084	0.0181343	0.0307534
K00170	pyruvate ferredoxin oxidoreductase, beta subunit [EC:1.2.7.1]	0.00713014	0.0392892	0.00900649	0.036699	0.0200076	0.0417223	0.0430956	0.0945216
K01644	citrate lyase subunit beta / citryl-CoA lyase [EC:4.1.3.6 4.1.3.34]	0.00713014	0.00109746	0.00768554	0.000298366	0	0.00015008	0.000426689	0.000678385
K03664	SsrA-binding protein	0.00713014	0.00373138	0.016692	0.00507222	0.0162562	0.00885474	0.00245346	0.00565321
K06921		0.00696809	0.00219493	0.0808182	0.0134265	0.0518948	0.0226621	0.00320017	0.0151506
K09765	hypothetical protein	0.00696809	0.00109746	0.0154912	0.00596732	0.0179756	0.0109559	0.00096005	0.00474869
K05833	putative ABC transport system ATP-binding protein	0.00696809	0.00351188	0.0417901	0.00119346	0.00515822	0.00270145	0.0030935	0.00316579
K09680	type II pantothenate kinase [EC:2.7.1.33]	0.00696809	0	0.000720519	0.00417712	0.000468929	0.00420225	0.00181343	0.00135677
K05934	precorrin-3B C17-methyltransferase [EC:2.1.1.131]	0.00696809	0.00373138	0.0127292	0.0131281	0.00390774	0.0138074	0.0076804	0.017638
K02283	pilus assembly protein CpaF	0.00696809	0.00702377	0.0323033	0.00134265	0.00797179	0.0144077	0.00544028	0.0156028
K03072	preprotein translocase subunit SecD	0.00696809	0.0114136	0.0171724	0.0111887	0.00844072	0.00795426	0.00949383	0.0201254
K07150		0.00696809	0.000877971	0.0100873	0.000149183	0.000312619	0	0.000320017	0.000226128
K03609	septum site-determining protein MinD	0.00696809	0.00438985	0.0267793	0.00104428	0.00703393	0.0022512	0.00149341	0.00113064
K00690	sucrose phosphorylase [EC:2.4.1.7]	0.00696809	0	0.0446722	0.00164101	0.0100038	0.00315169	0.00245346	0.00542708
K03800	lipoate-protein ligase A [EC:2.7.7.63]	0.00680604	0.00109746	0.00036026	0.0052214	0.00625238	0.00540289	0.00160008	0.00293967
K07138		0.00680604	0.0120721	0.0112881	0.00253611	0.00296988	0.00435233	0.00554696	0.00859287
K03589	cell division protein FtsQ	0.00680604	0.00131696	0.00456329	0.00372957	0.0139116	0.0091549	0.000746706	0.00429644
K07567	TdcF protein	0.00680604	0.00131696	0.00720519	0.00134265	0.0032825	0.00315169	0.00138674	0.00339192
K02029	polar amino acid transport system permease protein	0.00680604	0.00373138	0.0267793	0.00149183	0.0117232	0.00570305	0.00106672	0.00384418
K10108	maltose/maltodextrin transport system substrate-binding protein	0.00680604	0.0030729	0.0523577	0.0017902	0.0101601	0.00495265	0.00181343	0.00904513
K03856	3-deoxy-7-phosphoheptulonate synthase [EC:2.5.1.54]	0.00680604	0.0114136	0.0144104	0.00208856	0.00922227	0.00630337	0.00341351	0.00542708
K07033		0.00680604	0.00790174	0.0250981	0.012233	0.00906596	0.011256	0.00928049	0.0162812
K07080		0.00680604	0.00285341	0.00756545	0.00537059	0.0048456	0.00315169	0.00490692	0.00293967
K04487	cysteine desulfurase [EC:2.8.1.7]	0.00680604	0.00570681	0.0600433	0.00134265	0.0229775	0.00930498	0.00416022	0.008819
K00257		0.00680604	0.013828	0.0141702	0.00223774	0.0345444	0.0570305	0.00320017	0.0269093
K00996	undecaprenyl-phosphate galactose phosphotransferase [EC:2.7.8.6]	0.00680604	0.000658478	0.00996718	0.000149183	0.000312619	0.00015008	0	0.000226128
K03565	regulatory protein	0.00680604	0.000438985	0.0151309	0.00193938	0.00359512	0.0022512	0.000853378	0.000678385
K03698	CMP-binding protein	0.00680604	0.00197543	0.0398687	0.000298366	0.00468929	0.00315169	0.000533361	0.00135677
K02038	phosphate transport system permease protein	0.00664399	0.00285341	0.0271396	0.000447549	0.00734655	0.000750401	0.000853378	0.00248741
K00077	2-dehydropantoate 2-reductase [EC:1.1.1.169]	0.00664399	0.00175594	0.00168121	0.00551977	0.0290736	0.0162087	0.00181343	0.00949738
K03679	exosome complex component RRP4	0.00664399	0.0333629	0.00348251	0.0632536	0.0164125	0.0436734	0.0368019	0.0915819
K07021		0.00664399	0.031168	0.00216156	0.0344613	0.0104727	0.0349687	0.0310416	0.0630898
K02072	D-methionine transport system permease protein	0.00664399	0.00329239	0.0112881	0.00104428	0.0139116	0.00570305	0.00138674	0.00407031
K01814	phosphoribosylformimino-5-aminoimidazole carboxamide ribotide isomerase [EC:5.3.1.16]	0.00664399	0.00395087	0.0182531	0.0102936	0.0207892	0.0162087	0.00458691	0.0142461
K04488	nitrogen fixation protein NifU and related proteins	0.00664399	0.00395087	0.012489	0.00745915	0.00875334	0.00315169	0.00330684	0.00949738
K03523	putative biotin biosynthesis protein BioY	0.00664399	0.00131696	0.0301417	0.00208856	0.00390774	0.000900482	0.000533361	0.00113064
K03042	DNA-directed RNA polymerase subunit A" [EC:2.7.7.6]	0.00664399	0.0368748	0.00468337	0.0523632	0.0146931	0.0580811	0.039042	0.0893206
K09698	nondiscriminating glutamyl-tRNA synthetase [EC:6.1.1.24]	0.00664399	0.00351188	0.00912657	0.00119346	0.00140679	0.00420225	0.00138674	0.000904513
K02013	iron complex transport system ATP-binding protein [EC:3.6.3.34]	0.00664399	0.00636529	0.0223361	0.00805588	0.00672131	0.00870466	0.00213344	0.00587933
K03101	signal peptidase II [EC:3.4.23.36]	0.00664399	0.000438985	0.00348251	0.0043263	0.017663	0.00945506	0.00234679	0.00859287
K03263	translation initiation factor eIF-5A	0.00664399	0.00965768	0.00456329	0.0902557	0.00953489	0.0157584	0.0170676	0.0314318
K02069	putative ABC transport system permease protein	0.00648194	0.000219493	0.000480346	0.00596732	0.00218833	0.00405217	0.00106672	0.00203515
K00135	succinate-semialdehyde dehydrogenase (NADP+) [EC:1.2.1.16]	0.00648194	0.00131696	0.0105676	0.000447549	0.000312619	0.000450241	0.000320017	0.000904513
K06287	septum formation protein	0.00648194	0.00131696	0.0218557	0.00596732	0.0215707	0.0100554	0.00234679	0.00565321
K07282	poly-gamma-glutamate synthesis protein (capsule biosynthesis protein)	0.00648194	0.00109746	0.0348251	0.000895098	0.00781548	0.000900482	0.00096005	0.00113064
K02020	molybdate transport system substrate-binding protein	0.00648194	0.0107551	0.029181	0.0225266	0.00672131	0.0211613	0.0128007	0.035276
K01677	fumarate hydratase subunit alpha [EC:4.2.1.2]	0.00648194	0.0107551	0.0283404	0.0316268	0.00906596	0.0139575	0.0118406	0.0253264
K00097	4-hydroxythreonine-4-phosphate dehydrogenase [EC:1.1.1.262]	0.00648194	0.00329239	0.00036026	0.00581813	0.00140679	0.00435233	0.00160008	0.00271354
K00865	glycerate kinase [EC:2.7.1.31]	0.00648194	0.000877971	0.00312225	0.00223774	0.00218833	0.00435233	0.00224012	0.00316579
K02440	glycerol uptake facilitator protein	0.00648194	0.00812123	0.00420303	0.0205872	0.00640869	0.00435233	0.00394687	0.0072361
K09154	hypothetical protein	0.00648194	0.030729	0.00492355	0.0501255	0.0123485	0.0589816	0.0363752	0.0814062
K00661	maltose O-acetyltransferase [EC:2.3.1.79]	0.00648194	0.00790174	0.00300216	0.0017902	0.00765917	0.0240128	0.0096005	0.0192209
K07776	two-component system, OmpR family, response regulator RegX3	0.00648194	0.0133891	0.0192138	0.00313284	0.0296988	0.0222119	0.00266681	0.0192209
K03688	ubiquinone biosynthesis protein	0.00631989	0.00504833	0.0440717	0.00760833	0.0134426	0.00600321	0.00917381	0.0226128
K00674	2,3,4,5-tetrahydropyridine-2-carboxylate N-succinyltransferase [EC:2.3.1.117]	0.00631989	0.00746275	0.00684493	0.000895098	0.00844072	0.00375201	0.0038402	0.00384418
K02979	small subunit ribosomal protein S28e	0.00631989	0.014267	0.00384277	0.0356547	0.00437667	0.0147079	0.00938716	0.0269093
K01658	anthranilate synthase component II [EC:4.1.3.27]	0.00631989	0.00219493	0.0112881	0.00343121	0.00140679	0.00450241	0.00362686	0.00293967
K09815	zinc transport system substrate-binding protein	0.00631989	0.0030729	0.0296614	0.00193938	0.00609607	0.0132071	0.00362686	0.00859287
K01807	ribose 5-phosphate isomerase A [EC:5.3.1.6]	0.00631989	0.00219493	0.000840606	0.00193938	0.0187572	0.0156084	0.00437356	0.0108542
K07161		0.00631989	0.0166814	0.00516372	0.0295382	0.00937858	0.0199607	0.0177076	0.035276
K10110	maltose/maltodextrin transport system permease protein	0.00615785	0.00219493	0.0294212	0.000596732	0.00844072	0.00210112	0.000746706	0.000904513
K00797	spermidine synthase [EC:2.5.1.16]	0.00615785	0.0030729	0.0295413	0.000447549	0.00531453	0.00315169	0.00181343	0.00271354
K03500	ribosomal RNA small subunit methyltransferase B [EC:2.1.1.-]	0.00615785	0.00263391	0.0330238	0.000745915	0.0215707	0.0133571	0.00138674	0.00700997
K10041	putative glutamine transport system ATP-binding protein [EC:3.6.3.-]	0.00615785	0.00504833	0.0117685	0.00149183	0.00500191	0.00480257	0.0038402	0.00927126
K01839	phosphopentomutase [EC:5.4.2.7]	0.00615785	0.00351188	0.0321832	0.00760833	0.00281357	0.00480257	0.00266681	0.00226128
K02348	ElaA protein	0.00615785	0.00285341	0.000600433	0.0149183	0.000781548	0.0084045	0.0167475	0.00610546
K02652	type IV pilus assembly protein PilB	0.00615785	0.0131696	0.0261789	0.00193938	0.0403279	0.0424727	0.00618699	0.0316579
K01223	6-phospho-beta-glucosidase [EC:3.2.1.86]	0.0059958	0.0107551	0.0118886	0.0017902	0.00281357	0.00810434	0.00277348	0.00520095
K07319	putative adenine-specific DNA-methyltransferase [EC:2.1.1.72]	0.0059958	0.00438985	0.0395085	0.00268529	0.0104727	0.000600321	0.000320017	0
K06206	sugar fermentation stimulation protein A	0.0059958	0.0252417	0.0401089	0.0328202	0.00765917	0.00825442	0.0203744	0.0108542
K03058	DNA-directed RNA polymerase subunit N [EC:2.7.7.6]	0.0059958	0.00548732	0.00204147	0.0575846	0.00547084	0.00420225	0.00352018	0.0117587
K07862	serine/threonine transporter	0.0059958	0.00702377	0.0102074	0.00462467	0.00781548	0.00480257	0.00661368	0.00949738
K07003		0.0059958	0.00285341	0.0614843	0.00268529	0.112543	0.0916991	0.00224012	0.0445473
K03293	amino acid transporter, AAT family	0.0059958	0.00373138	0.00192138	0.000298366	0.0189135	0.000900482	0.00245346	0.00180903
K07793	putative tricarboxylic transport membrane protein	0.0059958	0.00175594	0.00852614	0.000298366	0.000312619	0.000450241	0.000640033	0.0015829
K00859	dephospho-CoA kinase [EC:2.7.1.24]	0.0059958	0.000219493	0.0192138	0.00328202	0.0114106	0.00825442	0.00096005	0.00429644
K01092	myo-inositol-1(or 4)-monophosphatase [EC:3.1.3.25]	0.00583375	0.00131696	0.000840606	0.00402794	0.0207892	0.0151581	0.00288015	0.00565321
K09691	lipopolysaccharide transport system ATP-binding protein	0.00583375	0.00724326	0.00780562	0.00387876	0.00359512	0.00525281	0.0030935	0.00633159
K09007	hypothetical protein	0.00583375	0.0188764	0.00432311	0.0420696	0.00890965	0.0156084	0.0129073	0.0298489
K01356	repressor LexA [EC:3.4.21.88]	0.00583375	0.000877971	0.0164519	0.000298366	0.0206329	0.00720385	0.00096005	0.00565321
K10008	glutamate transport system ATP-binding protein [EC:3.6.3.-]	0.00583375	0.0166814	0.0154912	0.00328202	0.00578345	0.00870466	0.0057603	0.010628
K03183	ubiquinone/menaquinone biosynthesis methyltransferase [EC:2.1.1.-]	0.00583375	0.000219493	0.00036026	0.00417712	0.0175067	0.0114061	0.00352018	0.00587933
K01187	alpha-glucosidase [EC:3.2.1.20]	0.00583375	0.00504833	0.0565607	0.00193938	0.015162	0.00465249	0.0057603	0.00700997
K01706	glucarate dehydratase [EC:4.2.1.40]	0.00583375	0	0.00816588	0	0.00109417	0.000450241	0.000533361	0.000904513
K11533	fatty acid synthase, bacteria type [EC:2.3.1.-]	0.00583375	0.00197543	0.00036026	0.000447549	0.0234464	0.000750401	0.00170676	0.00429644
K01745	histidine ammonia-lyase [EC:4.3.1.3]	0.00583375	0.00109746	0.00984709	0.000596732	0.0173504	0.0181597	0.000746706	0.00972351
K01934	5-formyltetrahydrofolate cyclo-ligase [EC:6.3.3.2]	0.00583375	0.000877971	0.0121287	0.0017902	0.0143805	0.00795426	0.000853378	0.00587933
K02022		0.00583375	0.000438985	0.00108078	0.00268529	0.00015631	0.00360193	0.000640033	0.0015829
K03534	L-rhamnose mutarotase [EC:5.1.3.-]	0.0056717	0.00109746	0.00156112	0.00641487	0.00140679	0.00435233	0.00202677	0.00226128
K02500	cyclase [EC:4.1.3.-]	0.0056717	0.00965768	0.0217357	0.0149183	0.0200076	0.020561	0.0101339	0.0214822
K01552		0.0056717	0.00131696	0.0616044	0.00268529	0.0164125	0.00120064	0.00234679	0.00361805
K00525	ribonucleoside-diphosphate reductase alpha chain [EC:1.17.4.1]	0.0056717	0.00812123	0.0070851	0.00283448	0.00890965	0.00540289	0.00544028	0.00904513
K07043		0.0056717	0.000877971	0.0157313	0.00238693	0.00125048	0.00165088	0.00096005	0.00135677
K07050		0.0056717	0.000438985	0.0417901	0.000895098	0.00234464	0.000300161	0	0.00180903
K07040	uncharacterized protein	0.00550965	0.000877971	0.0172925	0	0.0203202	0.00930498	0.00106672	0.00542708
K01744	aspartate ammonia-lyase [EC:4.3.1.1]	0.00550965	0.00856022	0.00480346	0.00149183	0.00234464	0.00360193	0.00362686	0.00316579
K00957	sulfate adenylyltransferase subunit 2 [EC:2.7.7.4]	0.00550965	0.00504833	0.0237771	0.000895098	0.0236027	0.0169591	0.00149341	0.0133416
K07246	tartrate dehydrogenase/decarboxylase / D-malate dehydrogenase [EC:1.1.1.93 4.1.1.73 1.1.1.83]	0.00550965	0.00175594	0.00768554	0.000298366	0	0.000600321	0.000640033	0.00113064
K10119	multiple sugar transport system permease protein	0.00550965	0.000877971	0.019454	0.000745915	0.00875334	0.00135072	0.00138674	0.00113064
K03424	TatD DNase family protein [EC:3.1.21.-]	0.00550965	0.00702377	0.00600433	0.0102936	0.024228	0.0250634	0.00405355	0.0178641
K03667	ATP-dependent HslUV protease ATP-binding subunit HslU	0.00550965	0.00790174	0.0126091	0.00119346	0.00375143	0.00585313	0.00522694	0.0110803
K03120	transcription initiation factor TFIID TATA-box-binding protein	0.00550965	0.0269976	0.00300216	0.075039	0.0140679	0.0481758	0.0349885	0.0834413
K01489	cytidine deaminase [EC:3.5.4.5]	0.00550965	0.000438985	0.0044432	0.00343121	0.000625238	0.00195104	0.000533361	0.0015829
K15051	DNA-entry nuclease	0.00550965	0	0.0390281	0.00193938	0.00218833	0.000450241	0.000213344	0
K02647	carbohydrate diacid regulator	0.00550965	0.00438985	0.0276199	0.0017902	0.0100038	0.00570305	0.00352018	0.00655772
K01815	4-deoxy-L-threo-5-hexosulose-uronate ketol-isomerase [EC:5.3.1.17]	0.00550965	0.0107551	0.00612441	0.00865261	0.00500191	0.0099053	0.012374	0.0122109
K07736	CarD family transcriptional regulator	0.00550965	0.000658478	0.0133296	0.000447549	0.00437667	0.000300161	0.000533361	0.00113064
K01515	ADP-ribose pyrophosphatase [EC:3.6.1.13]	0.00550965	0.000658478	0.0407093	0.00149183	0.00437667	0.00375201	0.00149341	0.00610546
K03724	ATP-dependent helicase Lhr and Lhr-like helicase [EC:3.6.4.-]	0.00550965	0.00680427	0.0157313	0.00402794	0.0134426	0.0106557	0.0121606	0.0198993
K02471	putative ATP-binding cassette transporter	0.00550965	0.000219493	0.011168	0.000149183	0.00015631	0.00015008	0	0
K02995	small subunit ribosomal protein S8e	0.0053476	0.00702377	0.00192138	0.039981	0.00437667	0.0120064	0.00746706	0.0212561
K00639	glycine C-acetyltransferase [EC:2.3.1.29]	0.0053476	0.0438985	0.00672484	0.0052214	0.022196	0.0348186	0.0210144	0.0468085
K07737	putative transcriptional regulator	0.0053476	0	0.000240173	0.00641487	0.000312619	0.00180096	0.000853378	0.00135677
K03074	preprotein translocase subunit SecF	0.0053476	0.00373138	0.00960692	0.00492304	0.00500191	0.00495265	0.00533361	0.0126632
K02203	phosphoserine / homoserine phosphotransferase [EC:3.1.3.3 2.7.1.39]	0.0053476	0.00351188	0.0241374	0.00283448	0.0232901	0.0219117	0.00138674	0.0131154
K06199	CrcB protein	0.0053476	0.00109746	0.00552398	0.00104428	0.0150057	0.00690369	0.00522694	0.0122109
K01514	exopolyphosphatase [EC:3.6.1.11]	0.0053476	0.000219493	0.00816588	0.000149183	0.000625238	0.000300161	0.000213344	0.00113064
K02843	heptosyltransferase II [EC:2.4.-.-]	0.0053476	0.000219493	0.0116484	0.000596732	0.00015631	0	0.000106672	0
K04094	glucose inhibited division protein Gid	0.0053476	0.00724326	0.0104475	0.00596732	0.0337629	0.0279149	0.00394687	0.0169596
K07000		0.0053476	0.000438985	0.00312225	0.00492304	0.00203202	0.0022512	0.000640033	0.000452256
K02908	large subunit ribosomal protein L30e	0.00518555	0.0162425	0.00204147	0.0446057	0.0112543	0.0267143	0.0236812	0.0470347
K06958	UPF0042 nucleotide-binding protein	0.00518555	0.00329239	0.0229365	0.000745915	0.00515822	0.0022512	0.00106672	0.00271354
K00583	tetrahydromethanopterin S-methyltransferase subunit G [EC:2.1.1.86]	0.00518555	0.0116331	0.00432311	0.0253611	0.00609607	0.00555297	0.00512027	0.0108542
K02474	UDP-N-acetyl-D-galactosamine dehydrogenase [EC:1.1.1.-]	0.00518555	0.00438985	0.00228164	0.00119346	0.00203202	0.00780418	0.00554696	0.0119848
K06133	4'-phosphopantetheinyl transferase [EC:2.7.8.-]	0.00518555	0.000219493	0.0213754	0.00119346	0.0137552	0.0099053	0.00117339	0.00452256
K06201	copper homeostasis protein	0.00518555	0.000219493	0.0200544	0.00253611	0.000937858	0.00165088	0.00096005	0.000904513
K03413	two-component system, chemotaxis family, response regulator CheY	0.00518555	0.00197543	0.00984709	0.000149183	0.00375143	0.00405217	0.00224012	0.00565321
K01468	imidazolonepropionase [EC:3.5.2.7]	0.00518555	0	0.00744536	0	0	0.00015008	0.000106672	0
K13927	holo-ACP synthase / triphosphoribosyl-dephospho-CoA synthase [EC:2.7.7.61 2.7.8.25]	0.00518555	0.000219493	0.00684493	0.000149183	0	0	0	0.000226128
K09710	hypothetical protein	0.00518555	0.00153645	0.0140501	0.00387876	0.0109417	0.0109559	0.00106672	0.00814062
K04070	putative pyruvate formate lyase activating enzyme [EC:1.97.1.4]	0.00518555	0.00109746	0.0311024	0.000745915	0.00453298	0.00120064	0.000320017	0.000452256
K05832	putative ABC transport system permease protein	0.00518555	0.00241442	0.0414298	0.000895098	0.0032825	0.00105056	0.000320017	0.000678385
K06020	sulfate-transporting ATPase [EC:3.6.3.25]	0.00518555	0.00636529	0.0176527	0.00283448	0.00171941	0.00570305	0.00341351	0.008819
K08300	ribonuclease E [EC:3.1.26.12]	0.00518555	0.00482884	0.00348251	0.00149183	0.00765917	0.00255136	0.00224012	0.00361805
K01439	succinyl-diaminopimelate desuccinylase [EC:3.5.1.18]	0.00502351	0.00373138	0.0080458	0.000298366	0.00531453	0.00540289	0.00202677	0.00113064
K13542	uroporphyrinogen III methyltransferase / synthase [EC:2.1.1.107 4.2.1.75]	0.00502351	0.000658478	0.0383076	0.00119346	0.0281357	0.0133571	0.000746706	0.00700997
K03325	arsenite transporter, ACR3 family	0.00502351	0.00131696	0.00816588	0.000745915	0.000781548	0.000900482	0.000320017	0.000678385
K02883	large subunit ribosomal protein L18e	0.00502351	0.0109746	0.00192138	0.0267037	0.00437667	0.0111059	0.00992052	0.0171857
K07084		0.00502351	0.000658478	0.00864623	0.000596732	0.00015631	0	0.000106672	0.000226128
K03559	biopolymer transport protein ExbD	0.00502351	0.00175594	0.00252182	0.00358039	0.0345444	0.026114	0.00234679	0.0146983
K01151	deoxyribonuclease IV [EC:3.1.21.2]	0.00502351	0.00438985	0.02774	0.00358039	0.00781548	0.00675361	0.00245346	0.00474869
K02030	polar amino acid transport system substrate-binding protein	0.00502351	0.0169009	0.00576415	0.0281956	0.0278231	0.0265642	0.0174942	0.0454518
K12267	peptide methionine sulfoxide reductase msrA/msrB [EC:1.8.4.11 1.8.4.12]	0.00502351	0.00438985	0.000840606	0.00372957	0.000625238	0.00345185	0.00330684	0.00339192
K06518	holin-like protein	0.00502351	0.000219493	0.0163318	0.000596732	0.0146931	0.00600321	0.000746706	0.00429644
K09482	glutamyl-tRNA(Gln) amidotransferase subunit D [EC:6.3.5.7]	0.00486146	0.0107551	0.00468337	0.0243168	0.00703393	0.0135072	0.0128007	0.0260047
K02315	DNA replication protein DnaC	0.00486146	0.000438985	0.0229365	0.000745915	0.00234464	0.000600321	0.000213344	0.00113064
K03785	3-dehydroquinate dehydratase I [EC:4.2.1.10]	0.00486146	0.000438985	0.0279802	0.00268529	0.0204766	0.0100554	0.000853378	0.00520095
K07642	two-component system, OmpR family, sensor histidine kinase BaeS [EC:2.7.13.3]	0.00486146	0.000219493	0.011048	0.000298366	0.000312619	0	0.000106672	0
K10907	aminotransferase [EC:2.6.1.-]	0.00486146	0.00197543	0.0331439	0.000745915	0.0245406	0.0202608	0.00181343	0.0144722
K03546	exonuclease SbcC	0.00486146	0.00263391	0.011048	0.00417712	0.01313	0.013057	0.00170676	0.00678385
K09817	zinc transport system ATP-binding protein [EC:3.6.3.-]	0.00486146	0.00109746	0.0174125	0.000596732	0.0245406	0.01876	0.000746706	0.0072361
K00336	NADH dehydrogenase I subunit G [EC:1.6.5.3]	0.00486146	0.014706	0.023657	0.00164101	0.0359512	0.0427729	0.00618699	0.0293967
K01983	SRP RNA	0.00486146	0.00965768	0.00840606	0.00686241	0.00390774	0.00930498	0.00544028	0.0117587
K03270	3-deoxy-D-manno-octulosonate 8-phosphate phosphatase (KDO 8-P phosphatase) [EC:3.1.3.45]	0.00486146	0.000438985	0.00288208	0.00298366	0.00015631	0.00240128	0.000853378	0.000904513
K14170	chorismate mutase / prephenate dehydratase [EC:5.4.99.5 4.2.1.51]	0.00486146	0.00219493	0.0309823	0.00149183	0.0032825	0.00120064	0.000213344	0.00113064
K01623	fructose-bisphosphate aldolase, class I [EC:4.1.2.13]	0.00486146	0.0158035	0.00468337	0.0225266	0.00703393	0.0114061	0.0100272	0.0217083
K08096	GTP cyclohydrolase IIa [EC:3.5.4.29]	0.00486146	0.013828	0.00240173	0.0374449	0.0109417	0.0144077	0.0168542	0.0318841
K00972	UDP-N-acetylglucosamine pyrophosphorylase [EC:2.7.7.23]	0.00486146	0.000438985	0.0390281	0.000298366	0.0254785	0.0192103	0.00170676	0.0156028
K05801	DnaJ like chaperone protein	0.00486146	0.00109746	0.000840606	0.0043263	0.000312619	0.00540289	0.00437356	0.00226128
K01193	beta-fructofuranosidase [EC:3.2.1.26]	0.00486146	0.00373138	0.0383076	0.000895098	0.0165688	0.0091549	0.00533361	0.0144722
K00400	methyl coenzyme M reductase system, component A2	0.00486146	0.0287535	0.00384277	0.0547501	0.019695	0.0375201	0.0392554	0.0911297
K01629	rhamnulose-1-phosphate aldolase [EC:4.1.2.19]	0.00486146	0.0201933	0.00744536	0.00447549	0.00406405	0.0142576	0.0237879	0.00768836
K13929	malonate decarboxylase alpha subunit [EC:2.3.1.187]	0.00486146	0.0061458	0.0158514	0.00134265	0	0	0.000106672	0
K06346	spoIIIJ-associated protein	0.00486146	0.00175594	0.019454	0.00119346	0.00750286	0.00405217	0.00096005	0.00339192
K03286	OmpA-OmpF porin, OOP family	0.00486146	0.00197543	0.00840606	0	0.000312619	0.00015008	0.000213344	0.000452256
K03320	ammonium transporter, Amt family	0.00486146	0.00680427	0.0044432	0.00760833	0.00859703	0.00480257	0.00672035	0.00949738
K01139	guanosine-3',5'-bis(diphosphate) 3'-pyrophosphohydrolase [EC:3.1.7.2]	0.00469941	0.000658478	0.0196942	0.00119346	0.00015631	0.000600321	0.000426689	0.000226128
K14123	energy-converting hydrogenase B subunit N	0.00469941	0.0116331	0.00468337	0.0253611	0.0107854	0.0189101	0.019201	0.0461302
K01424	L-asparaginase [EC:3.5.1.1]	0.00469941	0.0061458	0.00648467	0.0017902	0.0142242	0.0084045	0.00213344	0.00678385
K01902	succinyl-CoA synthetase alpha subunit [EC:6.2.1.5]	0.00469941	0.00790174	0.0210151	0.00895098	0.00969119	0.00855458	0.00682702	0.0135677
K00610	aspartate carbamoyltransferase regulatory subunit	0.00469941	0	0.0036026	0.00492304	0.00218833	0.00300161	0.00224012	0.00226128
K03612	electron transport complex protein RnfG	0.00469941	0.000219493	0.00720519	0.00149183	0.00140679	0.0015008	0.000640033	0.00113064
K00603	glutamate formiminotransferase [EC:2.1.2.5]	0.00469941	0	0.00696502	0.000149183	0.00015631	0	0	0
K01259	proline iminopeptidase [EC:3.4.11.5]	0.00469941	0.00417036	0.0018013	0.00268529	0.00296988	0.0084045	0.012374	0.00678385
K06042	precorrin-8X methylmutase [EC:5.4.1.2]	0.00469941	0.0169009	0.0148907	0.0281956	0.00937858	0.0235626	0.0183476	0.0499743
K03538	ribonuclease P protein subunit POP4 [EC:3.1.26.5]	0.00469941	0.00921869	0.00288208	0.0268529	0.00437667	0.00435233	0.00554696	0.0119848
K00394	adenylylsulfate reductase, subunit A [EC:1.8.99.2]	0.00469941	0.0030729	0.0447923	0.000895098	0.0359512	0.0183098	0.00288015	0.0142461
K06381	stage II sporulation protein D	0.00469941	0.000877971	0.0413098	0.00149183	0.0232901	0.0144077	0.000320017	0.00520095
K06923		0.00469941	0.00153645	0.0336242	0.000895098	0.00375143	0.000750401	0.000320017	0.00180903
K08963	methylthioribose-1-phosphate isomerase [EC:5.3.1.23]	0.00469941	0.0111941	0.00900649	0.0173052	0.00500191	0.00960514	0.00938716	0.0208038
K02050	sulfonate/nitrate/taurine transport system permease protein	0.00469941	0.00943819	0.00588424	0.0167085	0.0404842	0.0390209	0.0109872	0.0373112
K07507	putative Mg2+ transporter-C (MgtC) family protein	0.00469941	0.00131696	0.0036026	0.00253611	0.000625238	0.00345185	0.000746706	0.00293967
K07657	two-component system, OmpR family, phosphate regulon response regulator PhoB	0.00469941	0.00285341	0.0182531	0.000895098	0.00531453	0.00255136	0.000853378	0.00135677
K02446	fructose-1,6-bisphosphatase II [EC:3.1.3.11]	0.00453736	0.000219493	0.00684493	0.00134265	0.000468929	0.000300161	0.000320017	0.000452256
K00681	gamma-glutamyltranspeptidase [EC:2.3.2.2]	0.00453736	0.00351188	0.00816588	0	0.00140679	0.0015008	0.00128007	0.00180903
K04796	small nuclear ribonucleoprotein	0.00453736	0.00482884	0.00120087	0.057883	0.00734655	0.00615329	0.00565363	0.0162812
K03621	glycerol-3-phosphate acyltransferase PlsX [EC:2.3.1.15]	0.00453736	0.00241442	0.0289408	0.00134265	0.0250095	0.0163588	0.00096005	0.0149245
K01581	ornithine decarboxylase [EC:4.1.1.17]	0.00453736	0.000219493	0.00684493	0	0.000625238	0.00015008	0.000213344	0.000226128
K00833	adenosylmethionine-8-amino-7-oxononanoate aminotransferase [EC:2.6.1.62]	0.00453736	0.00241442	0.0080458	0.00208856	0.0148494	0.0250634	0.00160008	0.0151506
K00929	butyrate kinase [EC:2.7.2.7]	0.00453736	0.00417036	0.00300216	0.00268529	0.00890965	0.00645345	0.00469358	0.00949738
K01501	nitrilase [EC:3.5.5.1]	0.00453736	0.000658478	0.000120087	0.000447549	0.000312619	0	0.000106672	0
K02875	large subunit ribosomal protein L14e	0.00453736	0.00921869	0.00240173	0.0435614	0.00609607	0.00855458	0.00597365	0.0151506
K03540	ribonuclease P protein subunit RPR2 [EC:3.1.26.5]	0.00453736	0.00680427	0.00192138	0.0340137	0.00593976	0.00780418	0.00725371	0.0223867
K01848	methylmalonyl-CoA mutase, N-terminal domain [EC:5.4.99.2]	0.00453736	0.0169009	0.0144104	0.00283448	0.00140679	0.00240128	0.000853378	0.00203515
K01749	hydroxymethylbilane synthase [EC:2.5.1.61]	0.00453736	0.0030729	0.0237771	0.0120838	0.0181319	0.0138074	0.00629366	0.0217083
K11176	IMP cyclohydrolase [EC:3.5.4.10]	0.00453736	0.0120721	0.00564407	0.0377433	0.00797179	0.0084045	0.0104539	0.0196732
K00375	GntR family transcriptional regulator / MocR family aminotransferase	0.00453736	0.000658478	0.0421504	0.0017902	0.0378269	0.0172592	0.00128007	0.00949738
K03154	sulfur carrier protein	0.00437531	0.000438985	0.0109279	0.0043263	0.0112543	0.00780418	0.00160008	0.00407031
K11070	spermidine/putrescine transport system permease protein	0.00437531	0.00329239	0.0145305	0.00253611	0.00109417	0.00135072	0.000853378	0.0015829
K00150	glyceraldehyde-3-phosphate dehydrogenase (NAD(P)) [EC:1.2.1.59]	0.00437531	0.0259001	0.00324234	0.0480369	0.0192261	0.0459246	0.045229	0.0890945
K02231	adenosylcobinamide kinase / adenosylcobinamide-phosphate guanylyltransferase [EC:2.7.1.156 2.7.7.62]	0.00437531	0.000219493	0.0128493	0.00268529	0.00140679	0.00120064	0.000426689	0.000226128
K07316	adenine-specific DNA-methyltransferase [EC:2.1.1.72]	0.00437531	0.00417036	0.00840606	0.00716078	0.0104727	0.0157584	0.00128007	0.00768836
K00684	leucyl/phenylalanyl-tRNA--protein transferase [EC:2.3.2.6]	0.00437531	0.000877971	0.000240173	0.00537059	0.00015631	0.00195104	0.000533361	0.000904513
K08974	putative membrane protein	0.00437531	0.000219493	0.00792571	0.000895098	0.000312619	0.00015008	0.000320017	0.000452256
K03432	proteasome alpha subunit [EC:3.4.25.1]	0.00437531	0.0208518	0.00288208	0.0460975	0.00719024	0.0246132	0.0202677	0.0463563
K07010	putative glutamine amidotransferase	0.00437531	0.000877971	0.00684493	0	0.000468929	0.00015008	0	0.000226128
K07738	transcriptional repressor NrdR	0.00437531	0.00329239	0.016692	0.00119346	0.017663	0.00690369	0.00138674	0.00497482
K01051	pectinesterase [EC:3.1.1.11]	0.00437531	0	0.00036026	0.00208856	0.000312619	0.00420225	0.00128007	0.000678385
K00340	NADH dehydrogenase I subunit K [EC:1.6.5.3]	0.00437531	0.0111941	0.000600433	0.0111887	0.00406405	0.0109559	0.0107739	0.00655772
K04486	histidinol-phosphatase (PHP family) [EC:3.1.3.15]	0.00437531	0	0.0427508	0.000745915	0.00234464	0.00015008	0.000213344	0.000904513
K00963	UTP--glucose-1-phosphate uridylyltransferase [EC:2.7.7.9]	0.00437531	0.00834072	0.0115283	0.0176036	0.0128174	0.0118563	0.0117339	0.0174119
K02049	sulfonate/nitrate/taurine transport system ATP-binding protein	0.00437531	0.0179984	0.00684493	0.0198413	0.032825	0.0499767	0.0202677	0.0508788
K00366	ferredoxin-nitrite reductase [EC:1.7.7.1]	0.00437531	0.000219493	0.00924666	0.000596732	0.000468929	0.000450241	0.000106672	0.000678385
K02977	small subunit ribosomal protein S27Ae	0.00437531	0.0059263	0.00312225	0.036699	0.00265726	0.00285153	0.00234679	0.00678385
K01910	[citrate (pro-3S)-lyase] ligase [EC:6.2.1.22]	0.00437531	0	0.00504363	0	0.00015631	0	0.000106672	0.000226128
K00441	coenzyme F420 hydrogenase beta subunit [EC:1.12.98.1]	0.00421326	0.0261196	0.00528381	0.0483353	0.0170377	0.0301661	0.0371219	0.0816323
K09117	hypothetical protein	0.00421326	0.00109746	0.0189737	0.000447549	0.0178193	0.0118563	0.000533361	0.00700997
K13685	UDP-N-acetylglucosamine:undecaprenyl-P N-acetylglucosaminyl 1-P transferase [EC:2.7.8.-]	0.00421326	0.000877971	0.00648467	0.000298366	0.000468929	0.000300161	0.000213344	0.000678385
K14540	ribosome biogenesis GTPase A	0.00421326	0.000219493	0.0208951	0.00134265	0.00468929	0.000750401	0.000320017	0.000452256
K01992	ABC-2 type transport system permease protein	0.00421326	0.00131696	0.0501962	0.00104428	0.00734655	0.00390209	0.00170676	0.00452256
K09922	hypothetical protein	0.00421326	0.00329239	0.00036026	0.00924934	0.0081281	0.0099053	0.00650701	0.00407031
K07668	two-component system, OmpR family, response regulator VicR	0.00421326	0.000438985	0.00432311	0.000596732	0.015162	0.0100554	0.00128007	0.00949738
K09773	hypothetical protein	0.00421326	0.00219493	0.00780562	0.000149183	0.00109417	0	0.000106672	0
K00231	protoporphyrinogen oxidase [EC:1.3.3.4]	0.00421326	0.000438985	0.00036026	0.00298366	0.00109417	0.00465249	0.00117339	0.00203515
K06896		0.00421326	0	0.000480346	0.00238693	0.000781548	0.00330177	0.00117339	0.00113064
K02233	adenosylcobinamide-GDP ribazoletransferase [EC:2.7.8.26]	0.00421326	0.000438985	0.00984709	0.00268529	0.0015631	0.00390209	0.0019201	0.00407031
K02039	phosphate transport system protein	0.00421326	0.00482884	0.0172925	0.00253611	0.00593976	0.00930498	0.00288015	0.0151506
K00050	hydroxypyruvate reductase [EC:1.1.1.81]	0.00405121	0.000219493	0.0070851	0.000596732	0.000468929	0	0.000320017	0.000678385
K02614	phenylacetic acid degradation protein	0.00405121	0.00109746	0.00036026	0.00313284	0	0.00165088	0.00149341	0.00271354
K07459	putative ATP-dependent endonuclease of the OLD family	0.00405121	0	0.00552398	0	0.0132863	0	0.000320017	0
K07580	hypothetical protein	0.00405121	0.00987717	0.00168121	0.0298366	0.00390774	0.00720385	0.00586697	0.017638
K06310	spore germination protein	0.00405121	0	0.0366264	0.00104428	0.00234464	0	0	0
K02927	large subunit ribosomal protein L40e	0.00405121	0.00329239	0.000600433	0.0364006	0.00531453	0.00690369	0.00458691	0.0122109
K01958	pyruvate carboxylase [EC:6.4.1.1]	0.00405121	0.00680427	0.0134497	0.00164101	0.00937858	0.00195104	0.00288015	0.00384418
K01579	aspartate 1-decarboxylase [EC:4.1.1.11]	0.00405121	0.00131696	0.0044432	0.00119346	0.0104727	0.00735393	0.0019201	0.00339192
K06015	N-acyl-D-amino-acid deacylase [EC:3.5.1.81]	0.00405121	0	0.00876632	0.000149183	0.000312619	0	0	0
K07464	putative RecB family exonuclease	0.00405121	0.000877971	0.0108078	0.00149183	0.00125048	0.000900482	0.000853378	0.00135677
K05993	isochorismatase [EC:3.3.2.1]	0.00405121	0.000219493	0.000120087	0.0017902	0.00140679	0.0015008	0.000746706	0.00293967
K08998	hypothetical protein	0.00405121	0.000658478	0.00240173	0.000745915	0.00515822	0.00495265	0.00224012	0.00180903
K01442	choloylglycine hydrolase [EC:3.5.1.24]	0.00405121	0.00285341	0.0324234	0.0104428	0.00922227	0.00555297	0.00512027	0.0137938
K03327	multidrug resistance protein, MATE family	0.00405121	0.000219493	0.0080458	0.000149183	0.0276668	0.0171092	0.000640033	0.00859287
K03503	DNA polymerase V [EC:3.4.21.-]	0.00405121	0.00482884	0.00168121	0.00372957	0.000781548	0.00615329	0.0114139	0.00203515
K01759	lactoylglutathione lyase [EC:4.4.1.5]	0.00388917	0.00460935	0.0117685	0.00193938	0.006565	0.00240128	0.000213344	0.00180903
K01991	polysaccharide export outer membrane protein	0.00388917	0.000658478	0.00684493	0.000298366	0.000937858	0.00555297	0.00202677	0.00248741
K01040	glutaconate CoA-transferase, subunit B [EC:2.8.3.12]	0.00388917	0.000438985	0.0062445	0.000596732	0	0	0	0
K07574	putative RNA-binding protein containing KH domain	0.00388917	0.0120721	0.00336242	0.0232725	0.00765917	0.0153082	0.0132274	0.0241957
K07979	GntR family transcriptional regulator	0.00388917	0.000877971	0.0190938	0.00104428	0.00359512	0.00015008	0.000213344	0
K13292	phosphatidylglycerol:prolipoprotein diacylglycerol transferase [EC:2.-.-.-]	0.00388917	0.00175594	0.0267793	0.00223774	0.0139116	0.0106557	0.00106672	0.00587933
K03311	branched-chain amino acid:cation transporter, LIVCS family	0.00388917	0.000219493	0.00972701	0.000149183	0.000625238	0	0.000106672	0.000226128
K01708	galactarate dehydratase [EC:4.2.1.42]	0.00388917	0.000877971	0.00864623	0.000149183	0.000937858	0.00015008	0.000213344	0.000678385
K00926	carbamate kinase [EC:2.7.2.2]	0.00388917	0.0118526	0.0427508	0.00372957	0.00453298	0.00300161	0.00394687	0.00610546
K00324	NAD(P) transhydrogenase subunit alpha [EC:1.6.1.2]	0.00388917	0.00241442	0.00684493	0.000298366	0.0081281	0.00210112	0.00213344	0.00293967
K00620	glutamate N-acetyltransferase / amino-acid N-acetyltransferase [EC:2.3.1.35 2.3.1.1]	0.00388917	0.00636529	0.0323033	0.00313284	0.0361075	0.0300161	0.0038402	0.0253264
K03218	RNA methyltransferase, TrmH family [EC:2.1.1.-]	0.00388917	0.00153645	0.0162117	0.000447549	0.021727	0.015008	0.00096005	0.00994964
K07120		0.00372712	0.000438985	0.00768554	0.000149183	0.00015631	0	0	0.000452256
K09825	Fur family transcriptional regulator, peroxide stress response regulator	0.00372712	0	0.0188536	0.000895098	0.00500191	0.00165088	0.000106672	0.00135677
K00974	tRNA nucleotidyltransferase (CCA-adding enzyme) [EC:2.7.7.72 3.1.3.- 3.1.4.-]	0.00372712	0.00153645	0.0383076	0.00104428	0.0279794	0.0180096	0.00096005	0.00700997
K07001		0.00372712	0.00153645	0.000120087	0.00492304	0.00453298	0.0126067	0.00138674	0.00429644
K07481	transposase, IS5 family	0.00372712	0.00131696	0.00216156	0.000596732	0	0.000300161	0.000320017	0.000226128
K00033	6-phosphogluconate dehydrogenase [EC:1.1.1.44]	0.00372712	0.0177789	0.00756545	0.00134265	0.0106291	0.0099053	0.00917381	0.0151506
K02435	aspartyl-tRNA(Asn)/glutamyl-tRNA (Gln) amidotransferase subunit C [EC:6.3.5.6 6.3.5.7]	0.00372712	0.00241442	0.0168121	0.0043263	0.00844072	0.00660353	0.00170676	0.00497482
K02502	ATP phosphoribosyltransferase regulatory subunit	0.00372712	0.00219493	0.0254583	0.000745915	0.00343881	0.000750401	0.000426689	0.00180903
K00005	glycerol dehydrogenase [EC:1.1.1.6]	0.00372712	0.000438985	0.00744536	0.000298366	0.000312619	0	0.000533361	0.000452256
K07665	two-component system, OmpR family, copper resistance phosphate regulon response regulator CusR	0.00372712	0.000877971	0.0062445	0.000596732	0	0	0	0.000226128
K00567	methylated-DNA-[protein]-cysteine S-methyltransferase [EC:2.1.1.63]	0.00372712	0.00219493	0.00744536	0.0017902	0.0175067	0.00900482	0.00256013	0.00746223
K09949	hypothetical protein	0.00372712	0.000658478	0.00468337	0.000745915	0.000468929	0	0	0
K04566	lysyl-tRNA synthetase, class I [EC:6.1.1.6]	0.00372712	0.0221688	0.00420303	0.057883	0.0160999	0.0325674	0.0352018	0.0764313
K02323	DNA polymerase II small subunit [EC:2.7.7.7]	0.00372712	0.0223883	0.00216156	0.0235709	0.00797179	0.0138074	0.013654	0.028266
K07105		0.00356507	0.000438985	0.0165719	0.00208856	0.0015631	0.00120064	0.000746706	0.00135677
K09767	hypothetical protein	0.00356507	0.000438985	0.00492355	0.000447549	0.000625238	0.000600321	0.000213344	0
K11065	thiol peroxidase, atypical 2-Cys peroxiredoxin [EC:1.11.1.15]	0.00356507	0	0.00504363	0	0.000625238	0.00015008	0	0.000226128
K07726	putative transcriptional regulator	0.00356507	0	0.0114082	0.000149183	0.00125048	0	0	0
K02796	PTS system, mannose-specific IID component	0.00356507	0.00570681	0.00300216	0.00164101	0.011098	0.00390209	0.00181343	0.00248741
K06932		0.00356507	0.016462	0.00156112	0.0201397	0.00890965	0.0171092	0.0180276	0.0449995
K03787	5'-nucleotidase [EC:3.1.3.5]	0.00356507	0.00197543	0.000720519	0.0079067	0.017663	0.0142576	0.0038402	0.015829
K02037	phosphate transport system permease protein	0.00356507	0.00197543	0.0224562	0.000895098	0.00640869	0.00330177	0.000426689	0.00384418
K02056	simple sugar transport system ATP-binding protein [EC:3.6.3.17]	0.00356507	0.0166814	0.00348251	0.0043263	0.0048456	0.0121565	0.0088538	0.0167335
K10188	lactose/L-arabinose transport system substrate-binding protein	0.00356507	0.000658478	0.0345849	0.00119346	0.006565	0.00180096	0.00181343	0.00384418
K01666	4-hydroxy 2-oxovalerate aldolase [EC:4.1.3.39]	0.00356507	0.00285341	0.0242575	0.000298366	0.0281357	0.0291156	0.00106672	0.0183164
K03073	preprotein translocase subunit SecE	0.00356507	0.000219493	0.00480346	0.0017902	0.00296988	0.00525281	0.000533361	0.00113064
K09762	hypothetical protein	0.00356507	0.00175594	0.0224562	0.00164101	0.00734655	0.000900482	0.000320017	0.00180903
K02045	sulfate transport system ATP-binding protein [EC:3.6.3.25]	0.00356507	0.00219493	0.026419	0	0.0168814	0.0091549	0.000533361	0.00429644
K02896	large subunit ribosomal protein L24e	0.00356507	0.0129501	0.00252182	0.0296874	0.00265726	0.0106557	0.00896047	0.0198993
K02392	flagellar basal-body rod protein FlgG	0.00356507	0.000438985	0.0270195	0.000447549	0.00171941	0.000300161	0.000533361	0.00180903
K02922	large subunit ribosomal protein L37e	0.00340302	0.00548732	0.00144104	0.0477385	0.00422036	0.00645345	0.00405355	0.0122109
K10118	multiple sugar transport system permease protein	0.00340302	0.000219493	0.0177728	0.00134265	0.00687762	0.0015008	0.000213344	0.000678385
K03433	proteasome beta subunit [EC:3.4.25.1]	0.00340302	0.0175594	0.00192138	0.0651929	0.0150057	0.0216116	0.0220812	0.0558537
K03706	transcriptional pleiotropic repressor	0.00340302	0.000438985	0.00696502	0.000298366	0.000937858	0.00285153	0.000640033	0.0015829
K07273	lysozyme	0.00340302	0.000219493	0.000240173	0.00328202	0	0.00300161	0.00160008	0.00113064
K01361	lactocepin [EC:3.4.21.96]	0.00340302	0.00153645	0.00156112	0.000447549	0.00140679	0.00180096	0.000426689	0.00339192
K06399	stage IV sporulation protein B [EC:3.4.21.116]	0.00340302	0.000877971	0.0331439	0.00104428	0.00140679	0.000750401	0.000213344	0.000226128
K03152	4-methyl-5(b-hydroxyethyl)-thiazole monophosphate biosynthesis	0.00340302	0.000219493	0.0188536	0.00208856	0.00406405	0.00345185	0.00117339	0.00271354
K03639	molybdenum cofactor biosynthesis protein	0.00340302	0.00724326	0.0331439	0.0216315	0.0100038	0.0108058	0.0145074	0.028266
K02454	general secretion pathway protein E	0.00340302	0.00329239	0.00744536	0.000447549	0.0132863	0.0133571	0.00288015	0.0104019
K03272	D-beta-D-heptose 7-phosphate kinase / D-beta-D-heptose 1-phosphate adenosyltransferase [EC:2.7.1.- 2.7.7.-]	0.00340302	0.000219493	0.00744536	0	0.000625238	0	0.000106672	0.000452256
K11071	spermidine/putrescine transport system permease protein	0.00340302	0.000658478	0.0247378	0.00149183	0.00171941	0.00120064	0.000533361	0.000904513
K09788	hypothetical protein	0.00340302	0.000438985	0.00900649	0.00104428	0	0	0.000213344	0
K08602	oligoendopeptidase F [EC:3.4.24.-]	0.00340302	0.00241442	0.0450324	0.000596732	0.0365764	0.0226621	0.00149341	0.0124371
K01126	glycerophosphoryl diester phosphodiesterase [EC:3.1.4.46]	0.00340302	0.000658478	0.0118886	0.000149183	0.00406405	0.00195104	0.000533361	0.00113064
K03741	arsenate reductase [EC:1.20.4.1]	0.00324097	0	0.00420303	0.000298366	0.00109417	0	0.000213344	0.000226128
K14105	energy-converting hydrogenase A subunit N	0.00324097	0.00702377	0.000720519	0.0214823	0.00531453	0.0129069	0.0122673	0.0237435
K07279	hypothetical protein	0.00324097	0.00131696	0.00240173	0.000447549	0.000468929	0.000300161	0.000533361	0.00203515
K14623	DNA-damage-inducible protein D	0.00324097	0.00153645	0.00132095	0.000596732	0.00828441	0.00300161	0.000640033	0.00293967
K06016	N-carbamoyl-L-amino-acid hydrolase [EC:3.5.1.87]	0.00324097	0	0.00780562	0.000149183	0.000312619	0	0.000213344	0
K01760	cystathionine beta-lyase [EC:4.4.1.8]	0.00324097	0.00175594	0.00684493	0	0.0231338	0.0220618	0.00096005	0.0117587
K03151	thiamine biosynthesis protein ThiI	0.00324097	0.00460935	0.0289408	0.00402794	0.00578345	0.00330177	0.00160008	0.00384418
K03803	sigma-E factor negative regulatory protein RseC	0.00324097	0	0.000240173	0.0043263	0.00015631	0.00135072	0.000853378	0.000452256
K06875		0.00324097	0.00702377	0.0026419	0.015515	0.00437667	0.00735393	0.00682702	0.0169596
K05311	central glycolytic genes regulator	0.00324097	0.000877971	0.00468337	0	0.000781548	0.000450241	0	0
K08309	soluble lytic murein transglycosylase [EC:3.2.1.-]	0.00324097	0.000658478	0.0044432	0.000149183	0.0334503	0.0178596	0.000853378	0.0101758
K02067	putative ABC transport system substrate-binding protein	0.00324097	0.000877971	0.00852614	0.000149183	0.0473618	0.0312167	0.00138674	0.017638
K07192	flotillin	0.00324097	0.00285341	0.0100873	0.000596732	0.0376706	0.0234125	0.0038402	0.0196732
K01185	lysozyme [EC:3.2.1.17]	0.00324097	0	0.000120087	0.00134265	0.000468929	0.00165088	0.000426689	0.000452256
K01693	imidazoleglycerol-phosphate dehydratase [EC:4.2.1.19]	0.00324097	0.00395087	0.00972701	0.000745915	0.0187572	0.0124567	0.00138674	0.00949738
K01467	beta-lactamase [EC:3.5.2.6]	0.00324097	0.000219493	0.00540389	0	0.000312619	0.000750401	0.000106672	0
K00001	alcohol dehydrogenase [EC:1.1.1.1]	0.00324097	0.00131696	0.00600433	0.000149183	0.0107854	0.0123066	0.000213344	0.00452256
K00878	hydroxyethylthiazole kinase [EC:2.7.1.50]	0.00324097	0.00109746	0.024978	0.000298366	0.00375143	0.000300161	0.000426689	0.00135677
K03975	membrane-associated protein	0.00324097	0.00263391	0.000720519	0.00104428	0.00359512	0.00330177	0.00096005	0.00587933
K01823	isopentenyl-diphosphate delta-isomerase [EC:5.3.3.2]	0.00324097	0.0061458	0.00432311	0.0110395	0.000937858	0.00885474	0.00746706	0.0126632
K01911	O-succinylbenzoic acid--CoA ligase [EC:6.2.1.26]	0.00324097	0.000219493	0.00036026	0.00507222	0.0015631	0.00315169	0.00138674	0.000904513
K03823	phosphinothricin acetyltransferase [EC:2.3.1.183]	0.00324097	0.0030729	0.00588424	0.000596732	0.0032825	0.00375201	0.00277348	0.00859287
K06967		0.00324097	0	0.011048	0.000149183	0.000781548	0	0.000106672	0.000678385
K02412	flagellum-specific ATP synthase [EC:3.6.3.14]	0.00324097	0.000438985	0.0105676	0.000596732	0.00218833	0.000750401	0.00128007	0.0015829
K06864		0.00324097	0	0.00408294	0.00149183	0.000937858	0.000750401	0.00160008	0.00293967
K00533	ferredoxin hydrogenase large subunit [EC:1.12.7.2]	0.00324097	0	0.044432	0.000596732	0.00468929	0.000300161	0.000213344	0.000678385
K02114	F-type H+-transporting ATPase subunit epsilon [EC:3.6.3.14]	0.00324097	0	0.0184933	0.000447549	0.00203202	0.00135072	0.00096005	0.00271354
K11189	phosphocarrier protein	0.00324097	0.00219493	0.0118886	0.00149183	0.00719024	0.00510273	0.000640033	0.00361805
K01008	selenide, water dikinase [EC:2.7.9.3]	0.00324097	0.000877971	0.0313426	0.000596732	0.00187572	0.000600321	0.000746706	0.000452256
K07727	putative transcriptional regulator	0.00324097	0.00109746	0.00576415	0.00283448	0.00125048	0.0022512	0.00096005	0.00113064
K09824	hypothetical protein	0.00324097	0	0.00516372	0	0.00015631	0	0.000106672	0
K06442	putative hemolysin	0.00324097	0.00263391	0.0138099	0.000447549	0.00500191	0.00360193	0.000746706	0.0015829
K02048	sulfate transport system substrate-binding protein	0.00307892	0.00197543	0.0202946	0.000447549	0.0214144	0.0172592	0.00096005	0.00927126
K01805	xylose isomerase [EC:5.3.1.5]	0.00307892	0.00724326	0.000960692	0.00104428	0.0107854	0.00555297	0.00544028	0.0072361
K01436	aminoacylase [EC:3.5.1.14]	0.00307892	0.000877971	0.00756545	0.000149183	0.00265726	0.00015008	0.000533361	0.000226128
K10039	putative glutamine transport system substrate-binding protein	0.00307892	0.000219493	0.00228164	0.000596732	0.000937858	0.000750401	0.000213344	0.000678385
K08681	glutamine amidotransferase [EC:2.6.-.-]	0.00307892	0.000219493	0.0127292	0.00119346	0.0140679	0.00825442	0.000640033	0.00407031
K02390	flagellar hook protein FlgE	0.00307892	0.000658478	0.00276199	0.000596732	0.0015631	0.00165088	0.00181343	0.00407031
K01751	diaminopropionate ammonia-lyase [EC:4.3.1.15]	0.00307892	0	0.00924666	0.000298366	0.000937858	0.00015008	0	0.000452256
K02371	enoyl-[acyl carrier protein] reductase II [EC:1.3.1.-]	0.00307892	0.00175594	0.0237771	0.000596732	0.00734655	0.00525281	0.000746706	0.0015829
K03814	monofunctional biosynthetic peptidoglycan transglycosylase [EC:2.4.1.-]	0.00307892	0.00241442	0.000120087	0.00417712	0.000625238	0.00180096	0.00149341	0.00113064
K04656	hydrogenase maturation protein HypF	0.00307892	0.0177789	0.00492355	0.0150675	0.00953489	0.0135072	0.0115206	0.0273615
K09137	hypothetical protein	0.00307892	0	0.00408294	0.000298366	0	0	0	0
K09816	zinc transport system permease protein	0.00307892	0.000219493	0.0199344	0.000149183	0.0204766	0.0183098	0.000320017	0.00859287
K10005	glutamate transport system substrate-binding protein	0.00307892	0.000438985	0.00168121	0.000298366	0.00203202	0.000450241	0.000213344	0.000226128
K03294	basic amino acid/polyamine antiporter, APA family	0.00307892	0.00285341	0.00576415	0.000447549	0.00609607	0.00120064	0.00181343	0.00203515
K02018	molybdate transport system permease protein	0.00307892	0.00395087	0.019454	0.0102936	0.00281357	0.0154583	0.00853378	0.0133416
K07718	two-component system, sensor histidine kinase YesM [EC:2.7.13.3]	0.00307892	0.000658478	0.0450324	0.00119346	0.00515822	0.00165088	0.000533361	0.00542708
K05896	segregation and condensation protein A	0.00307892	0.00219493	0.0189737	0.000596732	0.00234464	0.00210112	0.000640033	0.000452256
K07458	DNA mismatch endonuclease, patch repair protein [EC:3.1.-.-]	0.00291687	0.00175594	0.00576415	0.000895098	0.0150057	0.00690369	0.000746706	0.00316579
K02492	glutamyl-tRNA reductase [EC:1.2.1.70]	0.00291687	0.00746275	0.00276199	0.0287923	0.0367328	0.0216116	0.00821376	0.0298489
K06961	ribosomal RNA assembly protein	0.00291687	0.00548732	0.00108078	0.0390859	0.00734655	0.00480257	0.00714704	0.0185425
K06174	ATP-binding cassette, sub-family E, member 1	0.00291687	0.0188764	0.00216156	0.0247644	0.0098475	0.031817	0.0302949	0.066934
K03779	L(+)-tartrate dehydratase alpha subunit [EC:4.2.1.32]	0.00291687	0.000877971	0.00504363	0.000447549	0.000312619	0.000450241	0	0.000678385
K07090		0.00291687	0.00109746	0.0240173	0.000745915	0.0211018	0.0121565	0.0019201	0.00768836
K11646	dehydroquinate synthase II [EC:1.4.1.-]	0.00291687	0.00987717	0.000600433	0.00910016	0.000781548	0.00615329	0.0057603	0.00836674
K02912	large subunit ribosomal protein L32e	0.00291687	0.0149255	0.00216156	0.0389367	0.0143805	0.0226621	0.019201	0.0477131
K02227	adenosylcobinamide-phosphate synthase CobD [EC:6.3.1.10]	0.00291687	0.000658478	0.0162117	0.00343121	0.00125048	0.00330177	0.00096005	0.00135677
K02586	nitrogenase molybdenum-iron protein alpha chain [EC:1.18.6.1]	0.00291687	0.00482884	0.0080458	0.000447549	0.0669005	0.0564302	0.00266681	0.0327886
K02585	nitrogen fixation protein NifB	0.00291687	0.0107551	0.00120087	0.0255103	0.0207892	0.0267143	0.0088538	0.0266831
K01163	hypothetical protein	0.00291687	0	0.00420303	0	0	0.000450241	0.000106672	0.00203515
K03799	heat shock protein HtpX [EC:3.4.24.-]	0.00291687	0.000877971	0.00432311	0.000745915	0.0118795	0.00825442	0.000853378	0.00452256
K00096	glycerol-1-phosphate dehydrogenase [NAD(P)] [EC:1.1.1.261]	0.00291687	0.00351188	0.0297815	0.00477385	0.00265726	0.00345185	0.00352018	0.00768836
K01155	type II restriction enzyme [EC:3.1.21.4]	0.00291687	0.00219493	0.0262989	0.000745915	0.00296988	0	0.000320017	0
K03758	arginine:ornithine antiporter	0.00291687	0.00153645	0.00192138	0.000298366	0.00109417	0.000300161	0.000106672	0.000452256
K00672	formylmethanofuran--tetrahydromethanopterin N-formyltransferase [EC:2.3.1.101]	0.00291687	0.0252417	0.00420303	0.04565	0.0200076	0.039171	0.039042	0.0805016
K00805	heptaprenyl diphosphate synthase [EC:2.5.1.30]	0.00291687	0	0.018013	0.000447549	0.00171941	0.000300161	0.000213344	0.000226128
K01596	phosphoenolpyruvate carboxykinase (GTP) [EC:4.1.1.32]	0.00275483	0.0230467	0.00852614	0.00119346	0.0520511	0.0777416	0.00832043	0.0572104
K01963	acetyl-CoA carboxylase carboxyl transferase subunit beta [EC:6.4.1.2]	0.00275483	0.00417036	0.0062445	0.000298366	0.00390774	0.00300161	0.00170676	0.00339192
K01621	phosphoketolase [EC:4.1.2.9]	0.00275483	0.00636529	0.00252182	0.0017902	0.0015631	0.00285153	0.00096005	0.00339192
K03056	DNA-directed RNA polymerase subunit L [EC:2.7.7.6]	0.00275483	0.00329239	0.00204147	0.0231234	0.00312619	0.00135072	0.0019201	0.00316579
K07053		0.00275483	0.00219493	0.00528381	0.000149183	0.0198513	0.00945506	0.000746706	0.00746223
K09123	hypothetical protein	0.00275483	0.0133891	0.00192138	0.0174544	0.00343881	0.0121565	0.0117339	0.0171857
K01246	DNA-3-methyladenine glycosylase I [EC:3.2.2.20]	0.00275483	0.000219493	0.00420303	0.000596732	0.000625238	0.000300161	0.000533361	0.00113064
K03780	L(+)-tartrate dehydratase beta subunit [EC:4.2.1.32]	0.00275483	0	0.00252182	0	0	0	0	0
K03306	inorganic phosphate transporter, PiT family	0.00275483	0.00329239	0.00468337	0.0079067	0.000781548	0.00135072	0.00149341	0.000904513
K00385	anaerobic sulfite reductase subunit C [EC:1.8.1.-]	0.00275483	0.000438985	0.0070851	0	0	0	0.000106672	0
K05685	macrolide transport system ATP-binding/permease protein [EC:3.6.3.-]	0.00275483	0.00175594	0.0106877	0.00119346	0.000625238	0.00165088	0.00160008	0.00248741
K02189	cobalamin biosynthesis protein CbiG	0.00275483	0.00109746	0.0189737	0.00686241	0.00453298	0.00465249	0.00533361	0.0108542
K07720	two-component system, response regulator YesN	0.00275483	0.000219493	0.037467	0.00104428	0.0032825	0.00105056	0.000533361	0.00316579
K07170	GAF domain-containing protein	0.00275483	0.00153645	0.00036026	0.00223774	0.000937858	0.00345185	0.00138674	0.0015829
K03271	phosphoheptose isomerase [EC:5.-.-.-]	0.00275483	0.00109746	0.0062445	0.000149183	0.000312619	0	0.000106672	0.000452256
K10725	archaeal cell division control protein 6	0.00275483	0.0199738	0.00216156	0.0182003	0.00562715	0.0136573	0.0135474	0.0203515
K00526	ribonucleoside-diphosphate reductase beta chain [EC:1.17.4.1]	0.00275483	0.000658478	0.000840606	0.00104428	0.00312619	0.00135072	0.00096005	0.0015829
K02915	large subunit ribosomal protein L34e	0.00275483	0.0114136	0.00216156	0.0320743	0.00468929	0.0154583	0.0103472	0.0309796
K12940	aminobenzoyl-glutamate utilization protein A	0.00275483	0.000219493	0.00864623	0	0	0.00015008	0	0.000226128
K10536	agmatine deiminase [EC:3.5.3.12]	0.00275483	0.00877971	0.0375871	0.00134265	0.0231338	0.0129069	0.00170676	0.010628
K00370	nitrate reductase 1, alpha subunit [EC:1.7.99.4]	0.00275483	0.00219493	0.00480346	0.000596732	0.000625238	0.000600321	0.000746706	0.00135677
K02499	tetrapyrrole methylase family protein / MazG family protein	0.00275483	0	0.0036026	0.000149183	0.000937858	0.00015008	0	0
K08591	glycerol-3-phosphate acyltransferase PlsY [EC:2.3.1.15]	0.00275483	0.000438985	0.02774	0.00119346	0.0132863	0.00675361	0.000426689	0.00678385
K02507	protein transport protein HofQ	0.00275483	0	0.00480346	0.000149183	0	0.00015008	0	0
K02052	putative spermidine/putrescine transport system ATP-binding protein	0.00259278	0.00987717	0.00408294	0.00253611	0.00312619	0.00465249	0.00597365	0.00814062
K07463	archaea-specific RecJ-like exonuclease	0.00259278	0.013828	0.00120087	0.0250627	0.00734655	0.011256	0.0157875	0.0287183
K05884	(R)-2-hydroxyacid dehydrogenase [EC:1.1.1.272]	0.00259278	0.0100967	0.000480346	0.0174544	0.00218833	0.00810434	0.00864045	0.0212561
K07721	ArsR family transcriptional regulator	0.00259278	0.00263391	0.000240173	0.0237201	0.00500191	0.00675361	0.00789375	0.0160551
K00036	glucose-6-phosphate 1-dehydrogenase [EC:1.1.1.49]	0.00259278	0.00197543	0.00036026	0.00119346	0.00375143	0.00120064	0.00128007	0.00203515
K00187	2-oxoisovalerate ferredoxin oxidoreductase, beta subunit [EC:1.2.7.7]	0.00259278	0.0149255	0.00168121	0.0125314	0.00312619	0.0163588	0.0150408	0.0253264
K03969	phage shock protein A	0.00259278	0.00351188	0.000960692	0.000298366	0.00109417	0.000750401	0.000746706	0.00135677
K03660	N-glycosylase/DNA lyase [EC:3.2.2.- 4.2.99.18]	0.00259278	0.00175594	0.0200544	0.00104428	0.00250095	0.000600321	0.00170676	0.00361805
K03469	ribonuclease HI [EC:3.1.26.4]	0.00259278	0.00241442	0.0208951	0.000447549	0.0201639	0.00930498	0.0019201	0.00633159
K14081	methanol corrinoid protein	0.00243073	0.0109746	0.000720519	0.00969689	0.000781548	0.00120064	0.000853378	0.00226128
K02122	V-type H+-transporting ATPase subunit F [EC:3.6.3.14]	0.00243073	0.0116331	0.0026419	0.0186479	0.00859703	0.0190602	0.0179209	0.0413815
K00995	CDP-diacylglycerol--glycerol-3-phosphate 3-phosphatidyltransferase [EC:2.7.8.5]	0.00243073	0.0030729	0.0135698	0.00387876	0.024228	0.0157584	0.00234679	0.00904513
K02795	PTS system, mannose-specific IIC component	0.00243073	0.0061458	0.00612441	0.00208856	0.0104727	0.00270145	0.00106672	0.0015829
K03113	translation initiation factor eIF-1	0.00243073	0.014267	0.00132095	0.031776	0.00906596	0.020561	0.0154675	0.0350499
K04654	hydrogenase expression/formation protein HypD	0.00243073	0.0114136	0.00420303	0.0192446	0.00765917	0.0133571	0.012374	0.0269093
K03319	divalent anion:Na+ symporter, DASS family	0.00243073	0.000219493	0.00648467	0.000149183	0.000625238	0.000300161	0.000213344	0.000226128
K05936	precorrin-4 C11-methyltransferase [EC:2.1.1.133]	0.00243073	0.0061458	0.00852614	0.00820506	0.0032825	0.00390209	0.00533361	0.00768836
K02047	sulfate transport system permease protein	0.00243073	0.000877971	0.0170523	0.000447549	0.00765917	0.00570305	0.000320017	0.00271354
K01678	fumarate hydratase subunit beta [EC:4.2.1.2]	0.00243073	0.0061458	0.0147706	0.0102936	0.00375143	0.00435233	0.00224012	0.00474869
K10747	DNA ligase 1 [EC:6.5.1.1]	0.00243073	0.00526783	0.0026419	0.00999526	0.00375143	0.00480257	0.00704037	0.00949738
K03386	peroxiredoxin (alkyl hydroperoxide reductase subunit C) [EC:1.11.1.15]	0.00243073	0.000219493	0.0026419	0.00134265	0.00109417	0.00015008	0.000106672	0.000904513
K06023	HPr kinase/phosphorylase [EC:2.7.11.- 2.7.4.-]	0.00243073	0.00395087	0.020775	0.000596732	0.0225086	0.0165088	0.00202677	0.0104019
K00547	homocysteine S-methyltransferase [EC:2.1.1.10]	0.00243073	0.000219493	0.0070851	0.000149183	0.00125048	0.000750401	0.000320017	0.000226128
K13049	carboxypeptidase PM20D1 [EC:3.4.17.-]	0.00243073	0	0.00612441	0.000596732	0.00015631	0	0	0
K10541	methyl-galactoside transport system permease protein	0.00243073	0.000658478	0.00408294	0.000447549	0	0	0.000106672	0.000452256
K01715	3-hydroxybutyryl-CoA dehydratase [EC:4.2.1.55]	0.00243073	0.00131696	0.00324234	0.00119346	0.00203202	0.00360193	0.00170676	0.00565321
K07160	UPF0271 protein	0.00243073	0.000438985	0.00420303	0	0	0	0.000106672	0.000226128
K12941	aminobenzoyl-glutamate utilization protein B	0.00243073	0.000219493	0.00480346	0.000149183	0	0	0	0.000226128
K10117	multiple sugar transport system substrate-binding protein	0.00243073	0.000219493	0.0295413	0.00104428	0.00828441	0.00165088	0.00117339	0.00113064
K02962	small subunit ribosomal protein S17e	0.00243073	0.00329239	0.000480346	0.0182003	0.000468929	0.00495265	0.00224012	0.00994964
K07045		0.00243073	0.00417036	0.00924666	0.0101444	0.00609607	0.00570305	0.00554696	0.0113064
K07749	formyl-CoA transferase [EC:2.8.3.16]	0.00243073	0	0.000240173	0.000298366	0.00218833	0.000300161	0.000106672	0.0015829
K07099		0.00226868	0.000219493	0.00396285	0	0.000625238	0.00015008	0	0
K07166	ACT domain-containing protein	0.00226868	0.000438985	0.00696502	0.000447549	0.00281357	0.00195104	0.000213344	0.000226128
K03236	translation initiation factor eIF-1A	0.00226868	0.00812123	0.000480346	0.0332678	0.00422036	0.0166589	0.0107739	0.0291705
K03407	two-component system, chemotaxis family, sensor kinase CheA [EC:2.7.13.3]	0.00226868	0.00285341	0.0070851	0.00298366	0.00640869	0.00630337	0.00490692	0.0117587
K03148	adenylyltransferase [EC:2.7.7.-]	0.00226868	0.000658478	0.00216156	0.00343121	0.0140679	0.00420225	0.00298682	0.00248741
K02282	pilus assembly protein CpaE	0.00226868	0.000219493	0.000720519	0	0.00015631	0	0.000213344	0.000678385
K03547	exonuclease SbcD	0.00226868	0.000658478	0.00528381	0.000298366	0.000781548	0.00495265	0.000106672	0.00248741
K04767	acetoin utilization protein AcuB	0.00226868	0	0.00516372	0.000149183	0.00015631	0	0	0.000226128
K02319	DNA polymerase I [EC:2.7.7.7]	0.00226868	0.0114136	0.000720519	0.0214823	0.00547084	0.0115562	0.0106672	0.0214822
K13892	glutathione transport system ATP-binding protein	0.00226868	0.00329239	0.00240173	0.000298366	0.0015631	0.00330177	0.00181343	0.00565321
K02410	flagellar motor switch protein FliG	0.00226868	0.0030729	0.0100873	0.000596732	0.00468929	0.00435233	0.00330684	0.00542708
K03394	precorrin-2/cobalt-factor-2 C20-methyltransferase [EC:2.1.1.130 2.1.1.151]	0.00226868	0.000219493	0.0230566	0.000447549	0.00250095	0.000600321	0.000533361	0.000904513
K07042	probable rRNA maturation factor	0.00226868	0.00109746	0.0100873	0.000149183	0.0168814	0.0106557	0.000533361	0.00610546
K03049	DNA-directed RNA polymerase subunit E' [EC:2.7.7.6]	0.00226868	0.00548732	0.00192138	0.0159626	0.0032825	0.0099053	0.00778707	0.0167335
K10040	putative glutamine transport system permease protein	0.00226868	0.000877971	0.00240173	0.000298366	0.00015631	0.000750401	0.000213344	0.000452256
K10026	queuosine biosynthesis protein QueE	0.00226868	0	0.00288208	0.000149183	0.0118795	0.00645345	0.000213344	0.00407031
K02591	nitrogenase molybdenum-iron protein beta chain [EC:1.18.6.1]	0.00226868	0.00351188	0.00540389	0.000745915	0.0637743	0.0445738	0.00224012	0.0251002
K00128	aldehyde dehydrogenase (NAD+) [EC:1.2.1.3]	0.00226868	0.00109746	0.00288208	0.000447549	0.0271979	0.0180096	0.00277348	0.0128893
K03238	translation initiation factor eIF-2 beta subunit	0.00226868	0.0114136	0.000840606	0.0496779	0.00500191	0.0138074	0.0104539	0.024648
K06223	DNA adenine methylase [EC:2.1.1.72]	0.00226868	0.0061458	0.0420303	0.00119346	0.00672131	0.00240128	0.00234679	0.000226128
K07402	xanthine dehydrogenase accessory factor	0.00226868	0	0.0244976	0.000895098	0.00250095	0.000300161	0.000533361	0
K02372	3R-hydroxymyristoyl ACP dehydrase [EC:4.2.1.-]	0.00226868	0.00329239	0.0186134	0.00134265	0.0276668	0.0133571	0.00149341	0.0113064
K02566	NagD protein	0.00226868	0.000219493	0.00636459	0.000149183	0.00015631	0.00015008	0	0.000226128
K01577	oxalyl-CoA decarboxylase [EC:4.1.1.8]	0.00226868	0	0.00036026	0	0.00234464	0	0	0.000452256
K09972	general L-amino acid transport system ATP-binding protein [EC:3.6.3.-]	0.00226868	0.00373138	0.00636459	0.00223774	0.00109417	0.00180096	0.00224012	0.00542708
K06013	STE24 endopeptidase [EC:3.4.24.84]	0.00226868	0	0.00408294	0	0	0	0	0
K01845	glutamate-1-semialdehyde 2,1-aminomutase [EC:5.4.3.8]	0.00226868	0.00548732	0.00936675	0.00223774	0.0256348	0.0210112	0.00330684	0.0196732
K01698	porphobilinogen synthase [EC:4.2.1.24]	0.00210663	0.00526783	0.00480346	0.00596732	0.0236027	0.0169591	0.00362686	0.015829
K03216	RNA methyltransferase, TrmH family, group 2 [EC:2.1.1.-]	0.00210663	0.000219493	0.0104475	0.000596732	0.00547084	0.00105056	0.000320017	0.00113064
K11780	FO synthase subunit 1 [EC:2.5.1.-]	0.00210663	0.0166814	0.0026419	0.0258086	0.0107854	0.0100554	0.013654	0.0284922
K00989	ribonuclease PH [EC:2.7.7.56]	0.00210663	0.00329239	0.00456329	0.000596732	0.0134426	0.0177095	0.00106672	0.0117587
K01817	phosphoribosylanthranilate isomerase [EC:5.3.1.24]	0.00210663	0.00131696	0.0157313	0.000895098	0.00296988	0.00120064	0.00117339	0.00293967
K11263	acetyl-/propionyl-CoA carboxylase, biotin carboxylase, biotin carboxyl carrier protein [EC:6.3.4.14]	0.00210663	0.00197543	0.000720519	0.000596732	0.006565	0.00195104	0.00106672	0.00203515
K09759	nondiscriminating aspartyl-tRNA synthetase [EC:6.1.1.23]	0.00210663	0	0.0331439	0.000895098	0.00390774	0	0	0
K04655	hydrogenase expression/formation protein HypE	0.00210663	0.00856022	0.00216156	0.0174544	0.00640869	0.0120064	0.00746706	0.0153767
K08384	stage V sporulation protein D (sporulation-specific penicillin-binding protein)	0.00210663	0.00109746	0.0133296	0.000745915	0.00281357	0.00180096	0.000106672	0.00316579
K09685	purine operon repressor	0.00210663	0.00153645	0.00348251	0.000149183	0.000937858	0.00135072	0.000320017	0.000452256
K03265	peptide chain release factor eRF subunit 1	0.00210663	0.00724326	0.000840606	0.0167085	0.00312619	0.00705377	0.00757373	0.0160551
K11104	melibiose permease	0.00210663	0.00109746	0.00276199	0.000745915	0.00171941	0.000600321	0.000533361	0.000226128
K02825	pyrimidine operon attenuation protein / uracil phosphoribosyltransferase [EC:2.4.2.9]	0.00210663	0.00548732	0.00432311	0.000596732	0.0098475	0.00780418	0.00405355	0.00700997
K12506	2-C-methyl-D-erythritol 4-phosphate cytidylyltransferase / 2-C-methyl-D-erythritol 2,4-cyclodiphosphate synthase [EC:2.7.7.60 4.6.1.12]	0.00210663	0.000438985	0.00324234	0.000298366	0	0	0	0
K00091	dihydroflavonol-4-reductase [EC:1.1.1.219]	0.00210663	0.0166814	0.00156112	0.00268529	0.0135989	0.0129069	0.00704037	0.0135677
K01919	glutamate--cysteine ligase [EC:6.3.2.2]	0.00210663	0	0.00036026	0.000149183	0.00593976	0.00135072	0.00117339	0.00316579
K11900	type VI secretion system protein ImpC	0.00210663	0	0.00732528	0.000298366	0.000312619	0.000600321	0.000106672	0.000226128
K07124		0.00210663	0.00197543	0.00312225	0.000596732	0.000937858	0.00015008	0	0.000452256
K07171		0.00194458	0.000877971	0.00684493	0.00149183	0.00109417	0.000300161	0.000320017	0.000226128
K07144		0.00194458	0.00702377	0.000600433	0.0164101	0.00515822	0.00780418	0.0110939	0.0198993
K02777	PTS system, glucose-specific IIA component [EC:2.7.1.69]	0.00194458	0.000219493	0.00252182	0	0.000312619	0	0	0
K05297	rubredoxin-NAD+ reductase [EC:1.18.1.1]	0.00194458	0	0.00828597	0.000149183	0.000625238	0	0	0
K10548	putative multiple sugar transport system ATP-binding protein	0.00194458	0.00746275	0.00228164	0.00134265	0.00359512	0.00765409	0.00597365	0.0140199
K09735	hypothetical protein	0.00194458	0.00504833	0.000720519	0.0234217	0.00468929	0.0084045	0.00618699	0.0142461
K09747	hypothetical protein	0.00194458	0.000877971	0.00516372	0.000745915	0.0137552	0.00795426	0.00117339	0.00655772
K03442	small conductance mechanosensitive channel	0.00194458	0.00197543	0.0170523	0.00119346	0.0132863	0.00570305	0.000106672	0.00339192
K02654	leader peptidase (prepilin peptidase) / N-methyltransferase [EC:3.4.23.43 2.1.1.-]	0.00194458	0.000219493	0.0153711	0.000298366	0.0153183	0.00660353	0	0.00429644
K09951	CRISPR-associated protein Cas2	0.00194458	0.000219493	0.00840606	0.0017902	0.00562715	0.00105056	0.000320017	0.00203515
K07078		0.00194458	0	0.00504363	0.000149183	0.000312619	0	0	0
K06891	ATP-dependent Clp protease adaptor protein ClpS	0.00194458	0.000219493	0.000120087	0.00641487	0.00015631	0.000600321	0.000533361	0.000452256
K04797	prefoldin alpha subunit	0.00194458	0.00987717	0.000600433	0.0259578	0.00453298	0.00615329	0.00746706	0.0149245
K00205	formylmethanofuran dehydrogenase subunit F [EC:1.2.99.5]	0.00194458	0.0188764	0.00288208	0.0258086	0.0167251	0.0268644	0.0281615	0.0576627
K07461	putative endonuclease	0.00194458	0	0.00720519	0.000298366	0.00828441	0.00510273	0	0.00271354
K03750	molybdopterin biosynthesis protein MoeA	0.00194458	0.00329239	0.00108078	0.00924934	0.00234464	0.00510273	0.00565363	0.0146983
K06179	ribosomal large subunit pseudouridine synthase C [EC:5.4.99.12]	0.00194458	0.00219493	0.0210151	0.00104428	0.0225086	0.0142576	0.000853378	0.0119848
K02237	competence protein ComEA	0.00194458	0.000877971	0.00408294	0.000447549	0.00719024	0.00285153	0.000853378	0.00271354
K03928	carboxylesterase [EC:3.1.1.1]	0.00194458	0	0.00348251	0	0.000625238	0	0	0
K06390	stage III sporulation protein AA	0.00194458	0	0.0265391	0.000149183	0.00187572	0	0	0
K10007	glutamate transport system permease protein	0.00194458	0.000438985	0.00036026	0.000596732	0.00218833	0.00015008	0.000213344	0
K06934		0.00194458	0	0.00276199	0.000149183	0.000468929	0	0	0
K04083	molecular chaperone Hsp33	0.00194458	0.00241442	0.023537	0.000596732	0.0215707	0.0151581	0.00117339	0.00700997
K10806	acyl-CoA thioesterase YciA [EC:3.1.2.-]	0.00194458	0	0.00240173	0	0	0.00015008	0	0
K06405	stage V sporulation protein AC	0.00194458	0	0.0136899	0	0.00250095	0.00015008	0.000213344	0.000226128
K09118	hypothetical protein	0.00194458	0.000658478	0.000240173	0.000298366	0.00640869	0	0.000746706	0.0015829
K01304	pyroglutamyl-peptidase [EC:3.4.19.3]	0.00178253	0.000658478	0.00384277	0.000298366	0.00125048	0	0	0
K04758	ferrous iron transport protein A	0.00178253	0.000658478	0.0105676	0.00208856	0.0106291	0.00435233	0.000426689	0.00407031
K02532	MFS transporter, OHS family, lactose permease	0.00178253	0.000219493	0	0.000298366	0.0048456	0	0.000640033	0.000904513
K03767	peptidyl-prolyl cis-trans isomerase A (cyclophilin A) [EC:5.2.1.8]	0.00178253	0.00395087	0.00228164	0.0017902	0.00296988	0.00300161	0.00362686	0.00474869
K02009	cobalt transport protein	0.00178253	0.00965768	0.000600433	0.0165593	0.00281357	0.0115562	0.00618699	0.0198993
K06183	ribosomal small subunit pseudouridine synthase A [EC:5.4.99.12]	0.00178253	0.000219493	0.0217357	0.000298366	0.0168814	0.0103555	0.000320017	0.00610546
K14106	energy-converting hydrogenase A subunit O	0.00178253	0.015145	0.00168121	0.0173052	0.0139116	0.0174093	0.0259214	0.0416076
K09729	hypothetical protein	0.00178253	0	0.00252182	0	0	0	0.000426689	0.000226128
K07460	putative endonuclease	0.00178253	0	0.0088864	0.000745915	0.00593976	0.0022512	0.000320017	0.000904513
K14124	energy-converting hydrogenase B subunit O	0.00178253	0.00197543	0.0018013	0.00551977	0.000625238	0.0022512	0.00266681	0.00407031
K09726	hypothetical protein	0.00178253	0.0125111	0.00144104	0.0235709	0.00500191	0.00855458	0.00928049	0.0235173
K07712	two-component system, NtrC family, nitrogen regulation response regulator GlnG	0.00178253	0.000658478	0.0104475	0.000447549	0.0350133	0.0183098	0.000640033	0.010628
K02427	ribosomal RNA large subunit methyltransferase E [EC:2.1.1.-]	0.00178253	0.00570681	0.00144104	0.021184	0.00281357	0.00345185	0.00597365	0.0133416
K14101	energy-converting hydrogenase A subunit J	0.00178253	0.0103162	0.00168121	0.0225266	0.00828441	0.0108058	0.0152541	0.0278138
K03471	ribonuclease HIII [EC:3.1.26.4]	0.00178253	0	0.00372268	0	0.00015631	0.00015008	0.000106672	0
K12510	tight adherence protein B	0.00178253	0.000219493	0.000720519	0	0.00015631	0.00015008	0	0.000226128
K01090	protein phosphatase [EC:3.1.3.16]	0.00178253	0.00153645	0.00456329	0.000298366	0.00500191	0.00120064	0.00138674	0.00271354
K07341	death on curing protein	0.00178253	0.000219493	0.00144104	0.00447549	0	0	0	0
K07571	S1 RNA binding domain protein	0.00178253	0.00131696	0.00432311	0.000298366	0.0015631	0.000750401	0.000106672	0.000452256
K00943	dTMP kinase [EC:2.7.4.9]	0.00178253	0.00219493	0.00396285	0.00134265	0.0182882	0.011256	0.00170676	0.00700997
K04517	prephenate dehydrogenase [EC:1.3.1.12]	0.00178253	0.00153645	0.0237771	0.00149183	0.0286047	0.020561	0.0057603	0.0149245
K10540	methyl-galactoside transport system substrate-binding protein	0.00178253	0.000658478	0.00420303	0.000895098	0.000625238	0	0.000106672	0.000452256
K06897		0.00178253	0.000877971	0.00036026	0.00253611	0.0160999	0.00735393	0.00149341	0.00429644
K02304	precorrin-2 dehydrogenase / sirohydrochlorin ferrochelatase [EC:1.3.1.76 4.99.1.4]	0.00178253	0.000438985	0.00204147	0.000447549	0.0192261	0.0102055	0.00320017	0.0119848
K04653	hydrogenase expression/formation protein HypC	0.00178253	0.00702377	0.000480346	0.0289415	0.0048456	0.0099053	0.00522694	0.0178641
K03243	translation initiation factor eIF-5B	0.00162049	0.00790174	0.000960692	0.0167085	0.00359512	0.0178596	0.013334	0.0257786
K06411	dipicolinate synthase subunit B	0.00162049	0	0.0100873	0	0.000937858	0	0	0
K01478	arginine deiminase [EC:3.5.3.6]	0.00162049	0.0100967	0.0106877	0.00283448	0.00125048	0.00435233	0.00245346	0.00520095
K02023	multiple sugar transport system ATP-binding protein	0.00162049	0.0103162	0.00324234	0.00104428	0.00547084	0.00900482	0.00522694	0.0156028
K04480	methanol---5-hydroxybenzimidazolylcobamide Co-methyltransferase [EC:2.1.1.90]	0.00162049	0.00548732	0.000240173	0.00343121	0.000781548	0.00135072	0.000640033	0.00248741
K04047	starvation-inducible DNA-binding protein	0.00162049	0.000219493	0.000120087	0.000298366	0.00218833	0.00120064	0.000106672	0.000452256
K06960		0.00162049	0.00109746	0.00492355	0.000447549	0.000468929	0.00180096	0.00096005	0.00203515
K12511	tight adherence protein C	0.00162049	0.000219493	0.00276199	0.000149183	0.000625238	0.000300161	0	0.000226128
K06973		0.00162049	0.00109746	0.0133296	0.000298366	0.0181319	0.0111059	0.00106672	0.00452256
K01935	dethiobiotin synthetase [EC:6.3.3.3]	0.00162049	0	0.00324234	0.000149183	0.0048456	0.00660353	0.000106672	0.00565321
K02653	type IV pilus assembly protein PilC	0.00162049	0.00175594	0.00432311	0	0.0293862	0.0189101	0.00117339	0.00814062
K09690	lipopolysaccharide transport system permease protein	0.00162049	0.000877971	0.00132095	0.00134265	0.0015631	0.00375201	0.00149341	0.00316579
K11076	putrescine transport system ATP-binding protein	0.00162049	0.000658478	0.00144104	0.000149183	0.00109417	0.000600321	0.000640033	0.000452256
K01182	oligo-1,6-glucosidase [EC:3.2.1.10]	0.00162049	0.00175594	0.00204147	0	0.00547084	0.00120064	0.00117339	0.00135677
K06416	stage V sporulation protein S	0.00162049	0.000219493	0.000720519	0.000149183	0.000781548	0.000300161	0.000106672	0
K04798	prefoldin beta subunit	0.00162049	0.00395087	0.000120087	0.0150675	0.00390774	0.00705377	0.00480025	0.0113064
K06394	stage III sporulation protein AE	0.00162049	0.000219493	0.0159715	0.000298366	0.00203202	0	0	0
K02046	sulfate transport system permease protein	0.00162049	0.000877971	0.0201745	0	0.00859703	0.00570305	0.000213344	0.00339192
K10006	glutamate transport system permease protein	0.00162049	0.000438985	0	0	0.00218833	0	0.000426689	0.000452256
K01523	phosphoribosyl-ATP pyrophosphohydrolase [EC:3.6.1.31]	0.00162049	0.00263391	0.00372268	0.00656405	0.01313	0.0135072	0.00490692	0.0115325
K09807	hypothetical protein	0.00162049	0.000219493	0.00396285	0	0.0146931	0.0106557	0.000533361	0.00452256
K01048	lysophospholipase [EC:3.1.1.5]	0.00162049	0	0.0193339	0.000895098	0.00218833	0	0	0
K07335	basic membrane protein A and related proteins	0.00162049	0.00417036	0.000960692	0.00164101	0.00406405	0.0103555	0.00512027	0.00927126
K10004	glutamate/aspartate transport system ATP-binding protein [EC:3.6.3.-]	0.00145844	0.00504833	0.00228164	0.00164101	0.00171941	0.00480257	0.00224012	0.00678385
K10977	trans-homoaconitate synthase [EC:4.1.3.-]	0.00145844	0.00680427	0.000840606	0.0143216	0.00468929	0.00720385	0.00928049	0.0180903
K09770	hypothetical protein	0.00145844	0	0.0132095	0	0.00187572	0.000300161	0.000106672	0.000226128
K06024	segregation and condensation protein B	0.00145844	0.00175594	0.0104475	0.000447549	0.0140679	0.00930498	0.00117339	0.00474869
K01494	dCTP deaminase [EC:3.5.4.13]	0.00145844	0.000219493	0.00120087	0.000745915	0.00437667	0.00180096	0.0019201	0.0015829
K10670	glycine reductase [EC:1.21.4.2]	0.00145844	0.00197543	0.00216156	0.000447549	0.000312619	0.00120064	0.00106672	0.0015829
K06883		0.00145844	0.000219493	0.00432311	0.000149183	0.0140679	0.00960514	0	0.00452256
K06410	dipicolinate synthase subunit A	0.00145844	0	0.00972701	0.00119346	0.00171941	0	0.000106672	0
K07742	hypothetical protein	0.00145844	0	0.00612441	0.000149183	0.00015631	0.00015008	0	0
K01633	dihydroneopterin aldolase [EC:4.1.2.25]	0.00145844	0	0.000120087	0.00149183	0.00875334	0.00540289	0.000426689	0.00248741
K00158	pyruvate oxidase [EC:1.2.3.3]	0.00145844	0.00131696	0.000840606	0.000298366	0.000312619	0.000450241	0	0.000226128
K03790	ribosomal-protein-alanine N-acetyltransferase [EC:2.3.1.128]	0.00145844	0.000219493	0.0158514	0	0.00265726	0.000300161	0.000426689	0.000452256
K01455	formamidase [EC:3.5.1.49]	0.00145844	0.000877971	0.000840606	0.000447549	0.00015631	0	0	0.000226128
K04762	ribosome-associated heat shock protein Hsp15	0.00145844	0.000658478	0.000840606	0.000745915	0.000781548	0.000600321	0.00096005	0.000226128
K03475	PTS system, ascorbate-specific IIC component	0.00145844	0.00153645	0.00132095	0.0017902	0.00203202	0.00255136	0.000853378	0.00203515
K00984	streptomycin 3"-adenylyltransferase [EC:2.7.7.47]	0.00145844	0.00987717	0.00192138	0.017902	0.000781548	0	0.000320017	0
K06937		0.00145844	0.00746275	0.000480346	0.00895098	0.00468929	0.0160586	0.0113073	0.0330147
K13787	geranylgeranyl diphosphate synthase, type I [EC:2.5.1.1 2.5.1.10 2.5.1.29]	0.00145844	0.00658478	0.00288208	0.00880179	0.0048456	0.00585313	0.0038402	0.00972351
K10230	sorbitol/mannitol transport system ATP-binding protein	0.00145844	0.00856022	0.00192138	0.00134265	0.00265726	0.00480257	0.0030935	0.00587933
K04652	hydrogenase nickel incorporation protein HypB	0.00145844	0.00877971	0.0036026	0.00954771	0.00422036	0.0084045	0.0076804	0.0153767
K02483	two-component system, OmpR family, response regulator	0.00145844	0.00153645	0.00192138	0.000298366	0.00406405	0.00015008	0.000533361	0.00113064
K01646	citrate lyase subunit gamma [EC:4.1.3.6]	0.00145844	0	0.00144104	0.000149183	0	0	0	0
K03716	spore photoproduct lyase [EC:4.1.99.-]	0.00145844	0.000438985	0.0339845	0.000447549	0.00234464	0.00015008	0	0
K03976	putative transcription regulator	0.00145844	0	0.0135698	0.000298366	0.0165688	0.0102055	0.000533361	0.00520095
K06351	inhibitor of KinA	0.00145844	0	0.00348251	0	0	0	0	0.000452256
K13640	MerR family transcriptional regulator, heat shock protein HspR	0.00145844	0.00438985	0.00432311	0.000596732	0.00265726	0.00210112	0.00096005	0.00293967
K07068		0.00145844	0.00921869	0.00312225	0.0565403	0.00343881	0.00810434	0.00682702	0.0151506
K09733	hypothetical protein	0.00145844	0.013828	0.00144104	0.0314776	0.00609607	0.0201108	0.0213344	0.0330147
K13788	phosphate acetyltransferase [EC:2.3.1.8]	0.00145844	0.00131696	0.00432311	0.000745915	0.0312619	0.0265642	0.00096005	0.015829
K05985	ribonuclease M5 [EC:3.1.26.8]	0.00145844	0	0.00372268	0	0.000937858	0.00015008	0.000106672	0
K07585	hypothetical protein	0.00145844	0.00702377	0.00108078	0.0168577	0.00296988	0.0108058	0.0106672	0.0178641
K06019	pyrophosphatase PpaX [EC:3.6.1.1]	0.00145844	0.000219493	0.00216156	0.000298366	0	0	0	0
K06944		0.00145844	0.0114136	0.00132095	0.0381908	0.0120358	0.0129069	0.0184543	0.0296228
K01443	N-acetylglucosamine-6-phosphate deacetylase [EC:3.5.1.25]	0.00145844	0.00153645	0.00672484	0.000149183	0.00109417	0.000900482	0.000640033	0.000904513
K03738	aldehyde:ferredoxin oxidoreductase [EC:1.2.7.5]	0.00145844	0.0158035	0.00456329	0.00193938	0.0081281	0.0133571	0.0076804	0.0255525
K03313	Na+:H+ antiporter, NhaA family	0.00145844	0.00285341	0.00192138	0.000149183	0.0281357	0.0220618	0.0019201	0.0135677
K06898		0.00129639	0.00285341	0.00336242	0.000745915	0.000625238	0.00300161	0.00149341	0.00452256
K02477	two-component system, LytT family, response regulator	0.00129639	0.00219493	0.00036026	0.000596732	0.00422036	0.00300161	0.000320017	0.00271354
K06182	ribosomal large subunit pseudouridine synthase F [EC:5.4.99.12]	0.00129639	0.000658478	0.0183732	0.000596732	0.00109417	0	0.000106672	0.000678385
K02044	phosphonate transport system substrate-binding protein	0.00129639	0.000658478	0.000840606	0.000149183	0.000312619	0.00015008	0.000426689	0.000678385
K00196	carbon-monoxide dehydrogenase iron sulfur subunit	0.00129639	0.00812123	0.000960692	0.0108904	0.00719024	0.0106557	0.0154675	0.0255525
K10941	sigma-54 specific transcriptional regulator, flagellar regulatory protein A	0.00129639	0	0.000720519	0	0	0.00015008	0.000213344	0
K00245	fumarate reductase iron-sulfur protein [EC:1.3.99.1]	0.00129639	0.00460935	0.00312225	0.00537059	0.00343881	0.0091549	0.00640033	0.0140199
K02889	large subunit ribosomal protein L21e	0.00129639	0.0089992	0.00228164	0.0307317	0.00765917	0.00930498	0.0117339	0.0271354
K02278	prepilin peptidase CpaA [EC:3.4.23.43]	0.00129639	0	0.00696502	0	0.000468929	0	0	0.000226128
K06176	tRNA pseudouridine synthase D [EC:5.4.99.12]	0.00129639	0.0129501	0.00144104	0.0262562	0.00937858	0.0154583	0.0162142	0.0357283
K00186	2-oxoisovalerate ferredoxin oxidoreductase, alpha subunit [EC:1.2.7.7]	0.00129639	0.00724326	0.00192138	0.00910016	0.00515822	0.0114061	0.00714704	0.017638
K01420	CRP/FNR family transcriptional regulator, anaerobic regulatory protein	0.00129639	0.000438985	0.00732528	0	0.0135989	0.0084045	0.000106672	0.00542708
K06988		0.00129639	0.0107551	0.0018013	0.0238693	0.00844072	0.0169591	0.0215478	0.0416076
K00936		0.00129639	0.00109746	0.0018013	0.00104428	0.000937858	0.00300161	0.00181343	0.00361805
K12960	5-methylthioadenosine/S-adenosylhomocysteine deaminase [EC:3.5.4.- 3.5.4.28]	0.00129639	0.000438985	0.0044432	0.00298366	0.00015631	0.000900482	0.00160008	0.00226128
K01232	maltose-6'-phosphate glucosidase [EC:3.2.1.122]	0.00129639	0.000658478	0.000720519	0.000895098	0.000781548	0	0.000320017	0.000678385
K14115	energy-converting hydrogenase B subunit F	0.00129639	0.0177789	0.00144104	0.0147691	0.00672131	0.0126067	0.0124807	0.0278138
K05946	N-acetylglucosaminyldiphosphoundecaprenol [EC:2.4.1.187]	0.00129639	0	0.00252182	0.000149183	0.000312619	0	0.000106672	0
K03552	holliday junction resolvase, archaea type	0.00129639	0.00482884	0.00036026	0.0102936	0.00140679	0.00465249	0.00202677	0.00474869
K03839	flavodoxin I	0.00129639	0	0.000600433	0.00253611	0.000468929	0.00390209	0.0038402	0.00271354
K03700	recombination protein U	0.00129639	0.000658478	0.00432311	0.00119346	0.000781548	0.00120064	0.000213344	0.000904513
K03436	DeoR family transcriptional regulator, fructose operon transcriptional repressor	0.00129639	0.000219493	0.0150108	0.00149183	0.00234464	0.000450241	0.000426689	0.000452256
K07260	D-alanyl-D-alanine carboxypeptidase [EC:3.4.16.4]	0.00129639	0.000219493	0.00240173	0.000298366	0.0104727	0.00570305	0.000320017	0.00633159
K06350	antagonist of KipI	0.00129639	0.000219493	0.00240173	0	0	0.00015008	0.000106672	0
K07443	methylated-DNA-protein-cysteine methyltransferase related protein	0.00129639	0.000219493	0.000120087	0.00193938	0.000468929	0.00105056	0.000320017	0.000452256
K05816	sn-glycerol 3-phosphate transport system ATP-binding protein [EC:3.6.3.20]	0.00129639	0.00921869	0.00468337	0.00193938	0.00390774	0.00555297	0.00458691	0.0122109
K03656	ATP-dependent DNA helicase Rep [EC:3.6.4.12]	0.00129639	0	0.00396285	0.000149183	0.000312619	0.000600321	0.000106672	0.000452256
K01611	S-adenosylmethionine decarboxylase [EC:4.1.1.50]	0.00129639	0.000877971	0.00216156	0	0.0032825	0.0015008	0.000213344	0.00113064
K09963	hypothetical protein	0.00129639	0.000219493	0.0026419	0	0.000312619	0	0	0
K03518	carbon-monoxide dehydrogenase small subunit [EC:1.2.99.2]	0.00129639	0.000219493	0.0193339	0.000596732	0.00140679	0	0.000426689	0.000226128
K06382	stage II sporulation protein E [EC:3.1.3.16]	0.00129639	0	0.0142903	0.000596732	0.00109417	0.00015008	0.000106672	0.000226128
K07284	sortase A	0.00129639	0.00175594	0.0122488	0.000149183	0.00640869	0.00120064	0.000853378	0.00271354
K06412	stage V sporulation protein G	0.00129639	0.000877971	0.00408294	0.000596732	0.00343881	0.00510273	0.000853378	0.00180903
K14110	energy-converting hydrogenase B subunit A	0.00129639	0.00460935	0.000120087	0.00984607	0.000937858	0.00735393	0.00437356	0.00587933
K11927	ATP-dependent RNA helicase RhlE [EC:3.6.4.13]	0.00129639	0.00395087	0.0026419	0.000447549	0.0317308	0.0181597	0.00181343	0.0153767
K06387	stage II sporulation protein R	0.00113434	0.000219493	0.0196942	0.000298366	0.00203202	0	0	0
K04769	AbrB family transcriptional regulator, stage V sporulation protein T	0.00113434	0.00241442	0.0127292	0.00358039	0.00343881	0.00180096	0.00117339	0.00226128
K03646	colicin import membrane protein	0.00113434	0.000438985	0.0044432	0.000298366	0.00140679	0.00135072	0.00138674	0.00203515
K07151	dolichyl-diphosphooligosaccharide--protein glycosyltransferase [EC:2.4.1.119]	0.00113434	0.00680427	0.000600433	0.0176036	0.00562715	0.00960514	0.012374	0.0230651
K09787	hypothetical protein	0.00113434	0.000219493	0.00480346	0.000149183	0.000312619	0.000300161	0.000213344	0
K01795		0.00113434	0.00175594	0.00120087	0.000895098	0.000468929	0.00210112	0.00160008	0.00248741
K03264	translation initiation factor eIF-6	0.00113434	0.00395087	0.000240173	0.0052214	0.00171941	0.00795426	0.0057603	0.0180903
K13926	ribosome-dependent ATPase	0.00113434	0.00241442	0.00408294	0.000149183	0.000312619	0.00165088	0.000640033	0.00271354
K02280	pilus assembly protein CpaC	0.00113434	0.000219493	0.00108078	0	0.00015631	0	0	0
K03059	DNA-directed RNA polymerase subunit P [EC:2.7.7.6]	0.00113434	0.00351188	0.000240173	0.0107412	0.00203202	0.00705377	0.00490692	0.0128893
K07584	hypothetical protein	0.00113434	0	0.00672484	0.000149183	0.0015631	0.000450241	0	0.000452256
K10563	formamidopyrimidine-DNA glycosylase [EC:3.2.2.23 4.2.99.18]	0.00113434	0	0.00228164	0.000298366	0.000312619	0	0.000213344	0
K03608	cell division topological specificity factor	0.00113434	0	0.0044432	0	0.000625238	0	0	0.000226128
K06407	stage V sporulation protein AE	0.00113434	0.000219493	0.00912657	0.000149183	0.000781548	0.00015008	0.000106672	0
K01926	AT-rich DNA-binding protein	0.00113434	0.00153645	0.00876632	0.000298366	0.00468929	0.00330177	0.00106672	0.00429644
K03422	methyl-coenzyme M reductase subunit D	0.00113434	0.00438985	0.000840606	0.00895098	0.00296988	0.00525281	0.0069337	0.0162812
K06209	chorismate mutase [EC:5.4.99.5]	0.00113434	0.000658478	0.0116484	0.000447549	0.00203202	0.000450241	0.000320017	0.000678385
K02303	uroporphyrin-III C-methyltransferase [EC:2.1.1.107]	0.00113434	0.00526783	0.000840606	0.00969689	0.00453298	0.0109559	0.00949383	0.0208038
K03465	thymidylate synthase (FAD) [EC:2.1.1.148]	0.00113434	0.00219493	0.00468337	0.000298366	0.000781548	0.000900482	0.000426689	0.000452256
K06320	spore maturation protein CgeB	0.00113434	0	0.00348251	0.000149183	0.00015631	0	0	0
K02279	pilus assembly protein CpaB	0.00113434	0	0.000600433	0	0	0	0	0
K02057	simple sugar transport system permease protein	0.00113434	0.00329239	0.000480346	0.00134265	0.00250095	0.00420225	0.00213344	0.00678385
K09121	hypothetical protein	0.00113434	0.000438985	0.00372268	0.0017902	0.000781548	0.000450241	0.000533361	0.00293967
K07183	response regulator NasT	0.00113434	0	0.00780562	0.000596732	0.00343881	0	0.000426689	0.000678385
K12369	dipeptide transport system permease protein	0.00113434	0.00131696	0.00132095	0	0.00015631	0	0.000213344	0.000226128
K11260	formylmethanofuran dehydrogenase subunit G [EC:1.2.99.5]	0.00113434	0.00351188	0.000480346	0.00551977	0.00171941	0.00900482	0.00618699	0.0117587
K13954	alcohol dehydrogenase [EC:1.1.1.1]	0.00113434	0.00153645	0.000600433	0	0.000312619	0.00180096	0.00138674	0.000226128
K07075		0.00113434	0.000219493	0.00456329	0.00149183	0.00125048	0.00015008	0.000320017	0.000226128
K10017	histidine transport system ATP-binding protein [EC:3.6.3.21]	0.00113434	0.00197543	0.00252182	0.000447549	0.000312619	0.000900482	0.00096005	0.00226128
K07254	hypothetical protein	0.00113434	0.00702377	0.000840606	0.022825	0.00875334	0.00795426	0.0109872	0.0314318
K06196	cytochrome c-type biogenesis protein	0.00113434	0	0.00288208	0.000149183	0.00015631	0.00015008	0.000746706	0.000226128
K06975		0.00113434	0.000219493	0.00216156	0	0.00015631	0	0	0
K06865		0.00113434	0.00263391	0.000600433	0.00298366	0.00250095	0.00375201	0.00565363	0.00949738
K00955	bifunctional enzyme CysN/CysC [EC:2.7.7.4 2.7.1.25]	0.00113434	0.00175594	0.00132095	0.00149183	0.00218833	0.00120064	0.00096005	0.000678385
K02683	DNA primase [EC:2.7.7.-]	0.00113434	0.00285341	0.000120087	0.00581813	0.000312619	0.000750401	0.00149341	0.00339192
K01962	acetyl-CoA carboxylase carboxyl transferase subunit alpha [EC:6.4.1.2]	0.00113434	0.00131696	0.00372268	0.000149183	0.00500191	0.000900482	0.000640033	0.00271354
K01673	carbonic anhydrase [EC:4.2.1.1]	0.00113434	0.00395087	0.00144104	0.0111887	0.00640869	0.0106557	0.00981385	0.0146983
K03189	urease accessory protein	0.00113434	0.00175594	0.00192138	0	0.000625238	0.00015008	0.000213344	0.000226128
K01414	oligopeptidase A [EC:3.4.24.70]	0.00113434	0.000877971	0.00120087	0.000447549	0.000468929	0.00135072	0.00128007	0.000226128
K00371	nitrate reductase 1, beta subunit [EC:1.7.99.4]	0.000972291	0.000877971	0.0036026	0.00119346	0.000781548	0.000600321	0.000533361	0.00113064
K00872	homoserine kinase [EC:2.7.1.39]	0.000972291	0.000877971	0.00348251	0.000149183	0.00359512	0.000300161	0.000640033	0.000226128
K00970	poly(A) polymerase [EC:2.7.7.19]	0.000972291	0.00153645	0.000600433	0.000447549	0.00531453	0.000900482	0.000746706	0.00180903
K06952		0.000972291	0.000438985	0.00228164	0	0.00015631	0	0	0
K13252	putrescine carbamoyltransferase [EC:2.1.3.6]	0.000972291	0.0182179	0.0158514	0.00477385	0.00109417	0.00315169	0.00426689	0.00746223
K01750	ornithine cyclodeaminase [EC:4.3.1.12]	0.000972291	0.000219493	0.000240173	0.000298366	0.00109417	0.000300161	0.000320017	0.000452256
K06403	stage V sporulation protein AA	0.000972291	0	0.0115283	0.000298366	0.00125048	0	0.000106672	0
K06397	stage III sporulation protein AH	0.000972291	0	0.00876632	0.000447549	0.000468929	0	0	0
K03578	ATP-dependent helicase HrpA [EC:3.6.4.13]	0.000972291	0.00175594	0.00168121	0.000298366	0.0081281	0.00165088	0.00138674	0.00203515
K01512	acylphosphatase [EC:3.6.1.7]	0.000972291	0	0.0070851	0	0.000312619	0	0	0.000226128
K09717	hypothetical protein	0.000972291	0.00548732	0.000600433	0.0137248	0.00437667	0.00570305	0.00672035	0.0144722
K07141		0.000972291	0.000219493	0.0144104	0.000298366	0.0015631	0.00015008	0.000426689	0.000678385
K00691	maltose phosphorylase [EC:2.4.1.8]	0.000972291	0.000658478	0.000480346	0	0.00125048	0.00015008	0.000320017	0.000678385
K03712	MarR family transcriptional regulator	0.000972291	0	0.00816588	0.00149183	0.000781548	0	0	0
K06987		0.000972291	0	0.00120087	0.000149183	0.0015631	0.00180096	0.000533361	0.00339192
K07482	transposase, IS30 family	0.000972291	0	0	0	0.000625238	0.000300161	0	0.000452256
K14120	energy-converting hydrogenase B subunit K	0.000972291	0.00790174	0.00156112	0.0114871	0.00844072	0.0147079	0.0152541	0.0359544
K09935	hypothetical protein	0.000972291	0	0.0174125	0.000745915	0.00218833	0.00270145	0.000213344	0.000678385
K06438	similar to stage IV sporulation protein	0.000972291	0	0.0112881	0.000298366	0.00125048	0	0.000106672	0
K06398	stage IV sporulation protein A	0.000972291	0.000658478	0.00276199	0.000596732	0.0032825	0.000750401	0.000106672	0.000678385
K06404	stage V sporulation protein AB	0.000972291	0	0.0103274	0.000298366	0.000625238	0	0	0
K09777	hypothetical protein	0.000972291	0.000877971	0.00192138	0.000298366	0.00359512	0	0	0
K00949	thiamine pyrophosphokinase [EC:2.7.6.2]	0.000972291	0	0.0129693	0.000298366	0.00171941	0	0.000106672	0.000678385
K00244	fumarate reductase flavoprotein subunit [EC:1.3.99.1]	0.000972291	0.00197543	0.0106877	0.000447549	0.00187572	0.00270145	0.000853378	0.00248741
K02395	flagellar protein FlgJ	0.000972291	0	0.00636459	0.000298366	0.00109417	0.00015008	0	0
K07158		0.000972291	0.0030729	0	0.0125314	0.00125048	0.00675361	0.00480025	0.0131154
K00579	tetrahydromethanopterin S-methyltransferase subunit C [EC:2.1.1.86]	0.000972291	0.00812123	0.00192138	0.00954771	0.00687762	0.0208612	0.0186676	0.0316579
K03090	RNA polymerase sigma-B factor	0.000972291	0.00373138	0.00456329	0.00164101	0.00125048	0.000900482	0.000640033	0.000904513
K03136	transcription initiation factor TFIIE alpha subunit	0.000972291	0.00241442	0.000120087	0.00969689	0.00140679	0.00330177	0.00298682	0.00836674
K01941	urea carboxylase [EC:6.3.4.6]	0.000972291	0.00131696	0.00468337	0.000149183	0.000312619	0.000450241	0	0.000452256
K06385	stage II sporulation protein P	0.000972291	0	0.00528381	0.000298366	0.000468929	0.00015008	0	0.000452256
K00886	polyphosphate glucokinase [EC:2.7.1.63]	0.000972291	0.000658478	0.000120087	0.000149183	0.00250095	0	0	0.000678385
K07096		0.000972291	0.00438985	0.000240173	0.0079067	0.00234464	0.00435233	0.00533361	0.00904513
K02230	cobaltochelatase CobN [EC:6.6.1.2]	0.000972291	0.0120721	0.00300216	0.0210348	0.00343881	0.00660353	0.0057603	0.0151506
K07739	elongator complex protein 3 [EC:2.3.1.48]	0.000972291	0.00636529	0.00132095	0.00880179	0.00359512	0.00930498	0.00661368	0.0146983
K07321	CO dehydrogenase maturation factor	0.000972291	0.00153645	0.00120087	0.000895098	0.0032825	0.0183098	0.0119473	0.0239696
K03885	NADH dehydrogenase [EC:1.6.99.3]	0.000972291	0.00636529	0.000600433	0.0079067	0.00515822	0.00765409	0.00778707	0.015829
K09003	hypothetical protein	0.000972291	0.00241442	0.00120087	0.00537059	0.00343881	0.00345185	0.00416022	0.00972351
K00383	glutathione reductase (NADPH) [EC:1.8.1.7]	0.000972291	0.00153645	0.000480346	0.00372957	0.00140679	0.00195104	0.00245346	0.00316579
K07590	large subunit ribosomal protein L7A	0.000972291	0	0.000240173	0	0	0	0	0
K02461	general secretion pathway protein L	0.000972291	0.000658478	0.00468337	0.000298366	0.00015631	0.00015008	0	0
K01362		0.000972291	0.00329239	0.000720519	0.000447549	0.00437667	0.00165088	0.00266681	0.00180903
K10190	lactose/L-arabinose transport system permease protein	0.000810243	0.000219493	0.0126091	0.000298366	0.00312619	0	0.000320017	0
K07392	AAA family ATPase	0.000810243	0.00263391	0.000240173	0.00656405	0.00390774	0.00255136	0.00330684	0.00407031
K07015		0.000810243	0	0.0134497	0.000447549	0.00125048	0.000750401	0.000213344	0
K00982	glutamate-ammonia-ligase adenylyltransferase [EC:2.7.7.42]	0.000810243	0.000658478	0.00132095	0	0.00593976	0.00015008	0.000746706	0.000678385
K04795	fibrillarin-like pre-rRNA processing protein	0.000810243	0.00153645	0.000120087	0.00372957	0.000312619	0.00795426	0.0038402	0.0137938
K14109	energy-converting hydrogenase A subunit R	0.000810243	0.00526783	0.000480346	0.013874	0.00250095	0.00420225	0.00682702	0.0156028
K01716	3-hydroxydecanoyl-[acyl-carrier-protein] dehydratase [EC:4.2.1.60]	0.000810243	0.000219493	0.000240173	0	0.000312619	0.000300161	0.000106672	0
K13288	oligoribonuclease [EC:3.1.-.-]	0.000810243	0	0.000240173	0	0.017663	0.00870466	0.000640033	0.00452256
K01470	creatinine amidohydrolase [EC:3.5.2.10]	0.000810243	0	0.00108078	0.000149183	0	0	0.000106672	0
K07699	two-component system, response regulator, stage 0 sporulation protein A	0.000810243	0.00241442	0.0120087	0.00164101	0.00437667	0.00105056	0.000426689	0.000904513
K02394	flagellar P-ring protein precursor FlgI	0.000810243	0	0.00336242	0.000149183	0.00015631	0.00015008	0	0
K13819	NifU-like protein	0.000810243	0.000877971	0.000720519	0	0.0145368	0.0109559	0	0.00407031
K02670	twitching motility protein PilU	0.000810243	0	0.00108078	0.000298366	0.000468929	0.00015008	0.000640033	0.000226128
K07159		0.000810243	0.00373138	0.000480346	0.0141724	0.00437667	0.00780418	0.00853378	0.0228389
K03637	molybdenum cofactor biosynthesis protein C	0.000810243	0.00373138	0.0140501	0.000596732	0.00234464	0.00360193	0.0019201	0.00587933
K03412	two-component system, chemotaxis family, response regulator CheB [EC:3.1.1.61]	0.000810243	0.000219493	0.00132095	0.000149183	0	0.00105056	0.000533361	0.0015829
K09136	hypothetical protein	0.000810243	0.00504833	0.000600433	0.00551977	0.00203202	0.00345185	0.00544028	0.0128893
K00647	3-oxoacyl-[acyl-carrier-protein] synthase I [EC:2.3.1.41]	0.000810243	0.00109746	0.00216156	0.000596732	0.0123485	0.0114061	0.000426689	0.00565321
K00997	holo-[acyl-carrier protein] synthase [EC:2.7.8.7]	0.000810243	0.000658478	0.00156112	0	0.0015631	0.000750401	0.000213344	0
K02558	UDP-N-acetylmuramate: L-alanyl-gamma-D-glutamyl-meso-diaminopimelate ligase [EC:6.3.2.-]	0.000810243	0.000658478	0.00228164	0	0.00015631	0.000450241	0.000213344	0.000452256
K05350	beta-glucosidase [EC:3.2.1.21]	0.000810243	0.00153645	0.00132095	0.000149183	0.00531453	0.00870466	0.00597365	0.0151506
K07013		0.000810243	0.00460935	0.00120087	0.017156	0.0048456	0.00570305	0.00682702	0.0174119
K03784	purine-nucleoside phosphorylase [EC:2.4.2.1]	0.000810243	0.00263391	0.00168121	0.000596732	0.00171941	0.00135072	0.00106672	0.00293967
K00331	NADH dehydrogenase I subunit B [EC:1.6.5.3]	0.000810243	0.000438985	0.00132095	0.000298366	0.0192261	0.0142576	0.00117339	0.00949738
K01042	L-seryl-tRNA(Ser) seleniumtransferase [EC:2.9.1.1]	0.000810243	0.00460935	0.000480346	0.00954771	0.00171941	0.00375201	0.00213344	0.00587933
K03089	RNA polymerase sigma-32 factor	0.000810243	0.000438985	0.00276199	0.000149183	0	0.000300161	0.000533361	0.000678385
K01697	cystathionine beta-synthase [EC:4.2.1.22]	0.000810243	0.000658478	0.000480346	0.000149183	0.00390774	0.000900482	0.00160008	0.00293967
K01181	endo-1,4-beta-xylanase [EC:3.2.1.8]	0.000810243	0.00329239	0.0109279	0	0.055021	0.0444238	0.0030935	0.0284922
K00281	glycine dehydrogenase [EC:1.4.4.2]	0.000810243	0.00548732	0.00216156	0.000895098	0.00140679	0.00810434	0.00373353	0.00565321
K14122	energy-converting hydrogenase B subunit M	0.000810243	0.00460935	0.000720519	0.00730996	0.00515822	0.0133571	0.0129073	0.0241957
K01636		0.000810243	0.00241442	0.000720519	0.000298366	0.000937858	0.000450241	0.000640033	0.000452256
K05521	ADP-ribosylglycohydrolase [EC:3.2.-.-]	0.000810243	0.00109746	0.00504363	0.000596732	0.000468929	0.00375201	0.00138674	0.00316579
K03571	rod shape-determining protein MreD	0.000810243	0.000219493	0.00396285	0.000596732	0.00140679	0.00240128	0.000106672	0.000452256
K09728	hypothetical protein	0.000810243	0.00219493	0.000480346	0.013874	0.00390774	0.00285153	0.00288015	0.00633159
K00627	pyruvate dehydrogenase E2 component (dihydrolipoamide acetyltransferase) [EC:2.3.1.12]	0.000810243	0.00241442	0.000600433	0.000447549	0.00125048	0.00120064	0.00106672	0.00203515
K06981		0.000810243	0.00131696	0.000480346	0.00283448	0.000625238	0.00255136	0.00426689	0.00452256
K02396	flagellar hook-associated protein 1 FlgK	0.000810243	0	0.00960692	0.000596732	0.000937858	0.000450241	0.000640033	0.00316579
K06408	stage V sporulation protein AF	0.000810243	0	0.00120087	0.000149183	0	0	0.000106672	0.000226128
K06396	stage III sporulation protein AG	0.000810243	0	0.00612441	0.000149183	0.000625238	0	0	0
K01551	arsenite-transporting ATPase [EC:3.6.3.16]	0.000810243	0.00680427	0.000720519	0.00805588	0.00453298	0.0108058	0.0102405	0.0180903
K01699	propanediol dehydratase large subunit [EC:4.2.1.28]	0.000810243	0.000438985	0.00132095	0.000298366	0.00015631	0.000450241	0	0.000226128
K03484	LacI family transcriptional regulator, sucrose operon repressor	0.000648194	0.000438985	0	0.000149183	0.00437667	0.000300161	0.000426689	0.000226128
K03697	ATP-dependent Clp protease ATP-binding subunit ClpE	0.000648194	0.00131696	0.000720519	0.000895098	0.000625238	0.00465249	0.000853378	0.000904513
K14099	energy-converting hydrogenase A subunit H	0.000648194	0.00131696	0.000600433	0.00566895	0.00125048	0.00240128	0.00266681	0.00361805
K00042	2-hydroxy-3-oxopropionate reductase [EC:1.1.1.60]	0.000648194	0	0.00036026	0	0.000468929	0	0.000213344	0.000226128
K14080	methylcobalamin:coenzyme M methyltransferase [EC:2.1.1.-]	0.000648194	0.0030729	0.000120087	0.00328202	0.00015631	0.000600321	0.000426689	0.00203515
K04061	flagellar biosynthesis protein	0.000648194	0	0.00660476	0.000298366	0.000625238	0	0.000106672	0
K08156	MFS transporter, DHA1 family, arabinose polymer transporter	0.000648194	0.000219493	0	0	0.00218833	0.000300161	0.000106672	0.000904513
K03658	DNA helicase IV [EC:3.6.4.12]	0.000648194	0.000877971	0	0.000298366	0.00531453	0	0.000533361	0.000452256
K10189	lactose/L-arabinose transport system permease protein	0.000648194	0.000438985	0.015251	0.000298366	0.00312619	0.00015008	0.000640033	0
K02099	AraC family transcriptional regulator, arabinose operon regulatory protein	0.000648194	0	0.00432311	0.000596732	0	0	0	0
K07455	recombination protein RecT	0.000648194	0	0.000240173	0	0	0	0	0
K11145	ribonuclease III family protein	0.000648194	0.000438985	0.00372268	0	0.000781548	0.00015008	0	0.000226128
K07047		0.000648194	0.00175594	0.00192138	0.000149183	0.00406405	0	0.00106672	0.000226128
K03322	manganese transport protein	0.000648194	0.000438985	0.00120087	0.000149183	0.00437667	0.000450241	0.000533361	0
K00772	5'-methylthioadenosine phosphorylase [EC:2.4.2.28]	0.000648194	0.000219493	0.00204147	0.000895098	0	0.000300161	0.000213344	0.000226128
K09116	hypothetical protein	0.000648194	0.00285341	0.00036026	0.00835424	0.00171941	0.000900482	0.00213344	0.00542708
K10038	glutamine transport system ATP-binding protein [EC:3.6.3.-]	0.000648194	0.000219493	0.000480346	0	0.00140679	0.000900482	0.000746706	0.000678385
K02944	large subunit ribosomal protein LX	0.000648194	0.00438985	0.00036026	0.0052214	0.00234464	0.00345185	0.0038402	0.00633159
K09766	hypothetical protein	0.000648194	0	0.00240173	0.000149183	0	0	0.000320017	0.00135677
K07497	putative transposase	0.000648194	0.00109746	0.000240173	0.000596732	0.0015631	0.000450241	0.000640033	0.00135677
K00575	chemotaxis protein methyltransferase CheR [EC:2.1.1.80]	0.000648194	0	0.000600433	0.000149183	0.000468929	0.000300161	0.000746706	0.000904513
K00901	diacylglycerol kinase [EC:2.7.1.107]	0.000648194	0.000219493	0.0147706	0.000298366	0.00125048	0	0	0.000678385
K01788	N-acylglucosamine-6-phosphate 2-epimerase [EC:5.1.3.9]	0.000648194	0.00219493	0.00168121	0.000447549	0.000468929	0	0.000213344	0.000226128
K06994	putative drug exporter of the RND superfamily	0.000648194	0.00109746	0.00036026	0.000447549	0.00109417	0.00105056	0.000533361	0.00361805
K03610	septum site-determining protein MinC	0.000648194	0	0.00300216	0.000596732	0.000937858	0	0.000106672	0.00113064
K06281	hydrogenase large subunit [EC:1.12.99.6]	0.000648194	0.00219493	0.000840606	0.000149183	0.00109417	0.00210112	0.00106672	0.00180903
K10235	alpha-glucoside transport system ATP-binding protein	0.000648194	0	0.00036026	0.000149183	0	0.000300161	0	0.000678385
K04752	nitrogen regulatory protein P-II 2	0.000648194	0	0.00132095	0.000298366	0.000625238	0.000300161	0.000106672	0
K09936	hypothetical protein	0.000648194	0.000219493	0.000480346	0	0.000937858	0.00015008	0	0
K03060	DNA-directed RNA polymerase subunit omega [EC:2.7.7.6]	0.000648194	0.000877971	0.000840606	0.000298366	0.00312619	0.00210112	0.00138674	0.00203515
K09022	UPF0076 protein YjgF	0.000648194	0.000219493	0.00768554	0.000149183	0.000468929	0	0.000106672	0
K02557	chemotaxis protein MotB	0.000648194	0.00658478	0.000480346	0.00119346	0.00250095	0.000900482	0.00096005	0.00113064
K07646	two-component system, OmpR family, sensor histidine kinase KdpD [EC:2.7.13.3]	0.000648194	0.000658478	0.000840606	0	0.000468929	0	0	0.000678385
K03562	biopolymer transport protein TolQ	0.000648194	0	0.000480346	0	0.0148494	0.00675361	0.000320017	0.00293967
K00756	pyrimidine-nucleoside phosphorylase [EC:2.4.2.2]	0.000648194	0.00219493	0.00132095	0.00104428	0.000625238	0.00165088	0.00160008	0.00293967
K01737	6-pyruvoyl tetrahydrobiopterin synthase [EC:4.2.3.12]	0.000648194	0.00241442	0.000720519	0.00716078	0.00500191	0.00825442	0.00522694	0.0137938
K07343	DNA transformation protein and related proteins	0.000648194	0.00131696	0.000240173	0.00566895	0.000312619	0	0.000106672	0
K07108		0.000648194	0.00241442	0.000600433	0.0117855	0.0032825	0.00495265	0.00437356	0.00994964
K09739	hypothetical protein	0.000486146	0.00175594	0	0.00551977	0.000781548	0.00105056	0.00149341	0.00271354
K07503	hypothetical protein	0.000486146	0.00153645	0	0.0017902	0.00500191	0.00345185	0.00277348	0.00474869
K07708	two-component system, NtrC family, nitrogen regulation sensor histidine kinase GlnL [EC:2.7.13.3]	0.000486146	0.000658478	0.000240173	0.000149183	0	0.000300161	0	0
K12371	dipeptide transport system ATP-binding protein	0.000486146	0.00153645	0.000960692	0.000298366	0.00140679	0.00240128	0.00234679	0.00497482
K00641	homoserine O-acetyltransferase [EC:2.3.1.31]	0.000486146	0.00395087	0.00108078	0.00238693	0.0365764	0.0297159	0.00394687	0.0196732
K07339	hypothetical protein	0.000486146	0	0.00384277	0	0.000312619	0	0	0
K06406	stage V sporulation protein AD	0.000486146	0.000438985	0.0187335	0.000298366	0.00359512	0.000600321	0.000320017	0.000226128
K02019	molybdate transport system regulatory protein	0.000486146	0.000877971	0	0.00507222	0.00140679	0.0015008	0.0019201	0.00339192
K13628	iron-sulfur cluster assembly protein	0.000486146	0	0	0	0.00015631	0.00015008	0	0.000226128
K04044	molecular chaperone HscA	0.000486146	0	0.000120087	0.000149183	0	0	0.000106672	0.000226128
K01322	prolyl oligopeptidase [EC:3.4.21.26]	0.000486146	0.00131696	0.000240173	0.000149183	0.000625238	0.000750401	0.00288015	0.00384418
K02974	small subunit ribosomal protein S24e	0.000486146	0.00395087	0.000960692	0.0104428	0.00296988	0.00750401	0.00458691	0.0126632
K07404	6-phosphogluconolactonase [EC:3.1.1.31]	0.000486146	0	0.00120087	0	0.00125048	0.00105056	0.00106672	0.00203515
K09251	putrescine aminotransferase [EC:2.6.1.82]	0.000486146	0.000438985	0.00108078	0	0.00218833	0.00015008	0	0.000226128
K02226	alpha-ribazole phosphatase [EC:3.1.3.73]	0.000486146	0	0.00924666	0	0.000625238	0	0	0
K03480	transcriptional antiterminator	0.000486146	0	0.00348251	0.000298366	0.00015631	0	0	0
K06204	DnaK suppressor protein	0.000486146	0	0.000480346	0	0.00015631	0	0.000106672	0
K00798	cob(I)alamin adenosyltransferase [EC:2.5.1.17]	0.000486146	0.000219493	0.00420303	0.000149183	0.000468929	0.000300161	0	0.000678385
K01419	ATP-dependent HslUV protease, peptidase subunit HslV [EC:3.4.25.-]	0.000486146	0.000438985	0.000240173	0	0.00015631	0.00015008	0.000320017	0.000904513
K08094	6-phospho-3-hexuloisomerase [EC:5.3.1.27]	0.000486146	0.00175594	0.000240173	0.00551977	0.0032825	0.00615329	0.00661368	0.0122109
K00188	2-oxoisovalerate ferredoxin oxidoreductase, delta subunit [EC:1.2.7.7]	0.000486146	0.00197543	0.000120087	0.00358039	0.00140679	0.00315169	0.00245346	0.00429644
K01734	methylglyoxal synthase [EC:4.2.3.3]	0.000486146	0.000438985	0.00564407	0	0.00109417	0.000750401	0.00096005	0.00248741
K03980	virulence factor	0.000486146	0.00263391	0.00144104	0.000895098	0.0296988	0.0303162	0.00160008	0.0160551
K03232	elongation factor EF-1 beta subunit	0.000486146	0.00263391	0.000120087	0.0161118	0.00422036	0.00585313	0.00330684	0.00994964
K00613	glycine amidinotransferase [EC:2.1.4.1]	0.000486146	0.00219493	0.000720519	0.000149183	0	0.000300161	0.000426689	0.000678385
K03573	DNA mismatch repair protein MutH	0.000486146	0	0.0165719	0	0.000312619	0	0.000213344	0
K05364	peptidoglycan glycosyltransferase [EC:2.4.1.129]	0.000486146	0.00285341	0.00144104	0.000149183	0.00562715	0.0015008	0.00117339	0.00226128
K01192	beta-mannosidase [EC:3.2.1.25]	0.000486146	0.00109746	0.00036026	0	0.000468929	0.000900482	0.000426689	0.00271354
K09746	hypothetical protein	0.000486146	0.000219493	0.00036026	0.000149183	0	0	0	0
K00582	tetrahydromethanopterin S-methyltransferase subunit F [EC:2.1.1.86]	0.000486146	0.00197543	0.000600433	0.00328202	0.00203202	0.00345185	0.00437356	0.0117587
K13829	shikimate kinase / 3-dehydroquinate synthase [EC:2.7.1.71 4.2.3.4]	0.000486146	0.000877971	0.000480346	0	0.0379832	0.0210112	0.000853378	0.0117587
K00809	deoxyhypusine synthase [EC:2.5.1.46]	0.000486146	0.0061458	0.000600433	0.000298366	0.000937858	0.00105056	0.00106672	0.00316579
K07722	CopG family transcriptional regulator, nickel-responsive regulator	0.000486146	0.00109746	0.00036026	0.00581813	0.00125048	0.00240128	0.00362686	0.00972351
K08282	non-specific serine/threonine protein kinase [EC:2.7.11.1]	0.000486146	0.000877971	0.000720519	0.000298366	0.000468929	0.000750401	0.000533361	0.000904513
K01067	acetyl-CoA hydrolase [EC:3.1.2.1]	0.000486146	0.00175594	0.00144104	0.000298366	0.00015631	0.000900482	0.000746706	0.00135677
K09702	hypothetical protein	0.000486146	0.00131696	0.00324234	0.000596732	0.0048456	0.00690369	0.00128007	0.00542708
K11781	FO synthase subunit 2 [EC:2.5.1.-]	0.000486146	0.000438985	0.000120087	0.00507222	0.00187572	0.00465249	0.00224012	0.00678385
K08372	putative serine protease PepD [EC:3.4.21.-]	0.000486146	0.000438985	0.000240173	0.000298366	0.00109417	0.000900482	0.000426689	0.00113064
K00100		0.000486146	0.00153645	0.000240173	0.00253611	0.000625238	0.00270145	0.00245346	0.00293967
K02419	flagellar biosynthetic protein FliP	0.000486146	0.000438985	0.00540389	0.000745915	0.00296988	0.000750401	0.000640033	0.0015829
K08971	putative membrane protein	0.000486146	0.000658478	0	0.00164101	0.000468929	0.00180096	0.00170676	0.00361805
K06862	energy-converting hydrogenase B subunit Q	0.000486146	0.00109746	0	0.00372957	0.00171941	0.000450241	0.00202677	0.00248741
K07572	putative nucleotide binding protein	0.000486146	0.000877971	0.000120087	0.00298366	0.00109417	0.00315169	0.00288015	0.00520095
K03725	archaea-specific helicase [EC:3.6.1.-]	0.000486146	0.00263391	0.00036026	0.00596732	0.0015631	0.00495265	0.00565363	0.0113064
K07060	UPF0271 protein	0.000486146	0.000877971	0.000120087	0.00537059	0.000781548	0.00165088	0.00213344	0.00271354
K07704	two-component system, LytT family, sensor histidine kinase LytS [EC:2.7.13.3]	0.000486146	0.000877971	0.00156112	0	0.00015631	0.000600321	0.000426689	0.000904513
K07135		0.000486146	0.000658478	0.000600433	0.00730996	0.00187572	0.00210112	0.00256013	0.00700997
K07006		0.000486146	0.000658478	0.000240173	0	0.00109417	0	0.000320017	0
K01239	purine nucleosidase [EC:3.2.2.1]	0.000486146	0.000658478	0	0	0.00265726	0.00015008	0.000320017	0.000904513
K09888	cell division protein ZapA	0.000486146	0.000219493	0.00600433	0.000447549	0.000937858	0.00135072	0.000853378	0.0015829
K03802	cyanophycin synthetase [EC:6.-.-.-]	0.000486146	0	0.000240173	0	0	0.000300161	0.000320017	0
K08316	ribosomal RNA small subunit methyltransferase D [EC:2.1.1.171]	0.000486146	0	0.00744536	0.000298366	0.000937858	0	0	0
K07573	exosome complex component CSL4	0.000486146	0.00482884	0.000120087	0.00850343	0.00312619	0.00780418	0.00437356	0.0117587
K02858	3,4-dihydroxy 2-butanone 4-phosphate synthase [EC:4.1.99.12]	0.000486146	0.00438985	0.00132095	0.00537059	0.00406405	0.00405217	0.00522694	0.0133416
K06317	inhibitor of the pro-sigma K processing machinery	0.000486146	0	0.000480346	0	0	0	0	0
K01451	hippurate hydrolase [EC:3.5.1.32]	0.000486146	0.000658478	0.00192138	0	0	0.000600321	0.000426689	0.000452256
K01417		0.000486146	0.000877971	0.000240173	0	0.000937858	0.00120064	0.000746706	0.00248741
K07230		0.000486146	0.000219493	0	0	0.00250095	0	0.000213344	0.000226128
K09772	cell division inhibitor SepF	0.000486146	0.000658478	0.00324234	0.000895098	0.00359512	0.000300161	0.000106672	0.0015829
K03708	transcriptional regulator CtsR	0.000486146	0.000658478	0.00168121	0	0.000312619	0.000450241	0	0
K01841	phosphoenolpyruvate phosphomutase [EC:5.4.2.9]	0.000486146	0.00109746	0.00036026	0	0.000937858	0.00690369	0.000746706	0.00248741
K03644	lipoic acid synthetase [EC:2.8.1.8]	0.000486146	0.000438985	0.000480346	0.000447549	0.000312619	0.000300161	0.000320017	0.00113064
K01226	trehalose-6-phosphate hydrolase [EC:3.2.1.93]	0.000486146	0.00109746	0.000120087	0	0.00109417	0.00105056	0.000640033	0.000678385
K01667	tryptophanase [EC:4.1.99.1]	0.000486146	0.00153645	0.000480346	0.000745915	0.000781548	0.00135072	0.00149341	0.000678385
K00574	cyclopropane-fatty-acyl-phospholipid synthase [EC:2.1.1.79]	0.000486146	0.000438985	0.00036026	0.000298366	0.000781548	0.000450241	0	0.00113064
K03273	D-glycero-D-manno-heptose 1,7-bisphosphate phosphatase [EC:3.1.3.-]	0.000486146	0.000219493	0.00108078	0	0.00015631	0.00015008	0	0
K09707	hypothetical protein	0.000486146	0.000219493	0.000120087	0.00104428	0.000468929	0.000750401	0.000106672	0.000678385
K03652	DNA-3-methyladenine glycosylase [EC:3.2.2.21]	0.000486146	0.000219493	0	0	0	0	0.000320017	0.000226128
K03789	ribosomal-protein-alanine N-acetyltransferase [EC:2.3.1.128]	0.000486146	0.000438985	0.00852614	0.000745915	0.00781548	0.00390209	0.000426689	0.00384418
K00208	enoyl-[acyl-carrier protein] reductase I [EC:1.3.1.9]	0.000486146	0.000658478	0.000240173	0.000447549	0.000781548	0	0.000320017	0.000678385
K02472	UDP-N-acetyl-D-mannosaminuronic acid dehydrogenase [EC:1.1.1.-]	0.000486146	0.00109746	0.000600433	0.00253611	0.000625238	0.00345185	0.00704037	0.00994964
K03568	TldD protein	0.000486146	0.00285341	0.000960692	0.00193938	0.0226649	0.0222119	0.00288015	0.0128893
K02405	RNA polymerase sigma factor for flagellar operon FliA	0.000486146	0	0.000240173	0.000149183	0.000312619	0.000300161	0.000213344	0.00180903
K14108	energy-converting hydrogenase A subunit Q	0.000486146	0.00329239	0.000240173	0.00671323	0.00234464	0.00435233	0.00597365	0.0156028
K02626	arginine decarboxylase [EC:4.1.1.19]	0.000486146	0.000219493	0.000720519	0.0052214	0.00015631	0.000300161	0.000533361	0.000452256
K03727	ATP-dependent RNA helicase HelY [EC:3.6.4.-]	0.000486146	0.00131696	0	0.000149183	0.0048456	0.000300161	0.00106672	0.000452256
K03753	molybdopterin-guanine dinucleotide biosynthesis protein B	0.000486146	0.00197543	0.000480346	0.00954771	0.00312619	0.00315169	0.0019201	0.00542708
K09005	hypothetical protein	0.000486146	0	0.00036026	0	0	0.00015008	0.000106672	0
K01046	triacylglycerol lipase [EC:3.1.1.3]	0.000486146	0	0.00132095	0.000149183	0.000468929	0	0.000106672	0.000678385
K12589	exosome complex component RRP42	0.000486146	0.0089992	0.00156112	0.0110395	0.00906596	0.0202608	0.0204811	0.0436427
K03820	apolipoprotein N-acyltransferase [EC:2.3.1.-]	0.000486146	0.000877971	0.000120087	0	0.000781548	0.000300161	0.000213344	0.000226128
K01170	tRNA-intron endonuclease [EC:3.1.27.9]	0.000486146	0.00241442	0	0.00477385	0.000468929	0.000450241	0.000746706	0.00135677
K04760	transcription elongation factor GreB	0.000486146	0.000219493	0.000840606	0	0.0109417	0.00780418	0	0.00542708
K07502	hypothetical protein	0.000486146	0	0.00276199	0.000149183	0.000468929	0.000300161	0.000746706	0.0015829
K07072		0.000486146	0.00131696	0	0.00134265	0.00109417	0.00120064	0.00138674	0.00226128
K02662	type IV pilus assembly protein PilM	0.000324097	0.00197543	0.00132095	0.000298366	0.0237591	0.0129069	0.000746706	0.00474869
K06989	aspartate dehydrogenase [EC:1.4.1.21]	0.000324097	0.00153645	0.000120087	0.00268529	0.00015631	0.00180096	0.00117339	0.00542708
K14094	energy-converting hydrogenase A subunit C	0.000324097	0.00175594	0.000120087	0.00596732	0.00125048	0.00120064	0.00170676	0.00384418
K03404	magnesium chelatase subunit D [EC:6.6.1.1]	0.000324097	0	0.000480346	0.000447549	0	0.00015008	0.000106672	0.000678385
K10439	ribose transport system substrate-binding protein	0.000324097	0.000877971	0.00036026	0.000745915	0.000937858	0.00450241	0.000640033	0.00384418
K01492	phosphoribosylaminoimidazolecarboxamide formyltransferase [EC:2.1.2.3]	0.000324097	0	0.000120087	0	0.00015631	0.000750401	0.000533361	0.000452256
K04093	chorismate mutase [EC:5.4.99.5]	0.000324097	0.00351188	0.00036026	0.0132773	0.00250095	0.00540289	0.00352018	0.0124371
K07262	D-alanyl-D-alanine endopeptidase (penicillin-binding protein 7) [EC:3.4.99.-]	0.000324097	0	0	0.000149183	0	0	0	0
K11261	formylmethanofuran dehydrogenase subunit E [EC:1.2.99.5]	0.000324097	0.000658478	0	0.00387876	0.00234464	0.00345185	0.00458691	0.0142461
K09721	hypothetical protein	0.000324097	0.000658478	0.00036026	0.0205872	0	0.000600321	0.00106672	0.0015829
K07816	putative GTP pyrophosphokinase [EC:2.7.6.5]	0.000324097	0.000658478	0.000480346	0.000298366	0.00500191	0.000450241	0	0
K07039	uncharacterized protein	0.000324097	0.000877971	0.000240173	0.000149183	0.000312619	0.000450241	0.000213344	0.000452256
K01415	endothelin-converting enzyme [EC:3.4.24.71]	0.000324097	0.000438985	0.00168121	0.000298366	0.000937858	0.00195104	0.00106672	0.0015829
K00832	aromatic-amino-acid transaminase [EC:2.6.1.57]	0.000324097	0.000219493	0.00036026	0	0.000312619	0	0.000106672	0.000226128
K07290	hypothetical protein	0.000324097	0	0.000240173	0	0	0	0.000106672	0
K00204	formylmethanofuran dehydrogenase subunit H [EC:1.2.99.5]	0.000324097	0.00417036	0.00036026	0.0135756	0.00406405	0.0102055	0.00597365	0.0151506
K00652	8-amino-7-oxononanoate synthase [EC:2.3.1.47]	0.000324097	0.000658478	0.00288208	0.000149183	0.000312619	0.000600321	0.000320017	0.000452256
K05367	penicillin-binding protein 1C [EC:2.4.1.-]	0.000324097	0.000658478	0	0.000149183	0	0.00015008	0.000320017	0.000226128
K07667	two-component system, OmpR family, KDP operon response regulator KdpE	0.000324097	0.000877971	0.000240173	0	0.000312619	0.000600321	0.00106672	0.000678385
K00171	pyruvate ferredoxin oxidoreductase, delta subunit [EC:1.2.7.1]	0.000324097	0.00724326	0.000600433	0.010592	0.00296988	0.00960514	0.0103472	0.017638
K03385	formate-dependent nitrite reductase, periplasmic cytochrome c552 subunit [EC:1.7.2.2]	0.000324097	0.000877971	0.000120087	0.000298366	0.00015631	0.000300161	0.000106672	0
K03387	alkyl hydroperoxide reductase subunit F [EC:1.6.4.-]	0.000324097	0.000658478	0.000840606	0.000149183	0.000468929	0.00015008	0.000426689	0.00113064
K05874	methyl-accepting chemotaxis protein I, serine sensor receptor	0.000324097	0.000438985	0.000240173	0	0	0	0	0
K13853	3-deoxy-7-phosphoheptulonate synthase / chorismate mutase [EC:2.5.1.54 5.4.99.5]	0.000324097	0.000219493	0.000120087	0	0	0	0	0
K03626	nascent polypeptide-associated complex subunit alpha	0.000324097	0.000219493	0	0	0	0	0	0
K03215	RNA methyltransferase, TrmA family [EC:2.1.1.-]	0.000324097	0.000658478	0	0.000149183	0.0231338	0.0132071	0.000106672	0.00542708
K01739	cystathionine gamma-synthase [EC:2.5.1.48]	0.000324097	0.00197543	0.00036026	0.000149183	0.00281357	0.000600321	0.000640033	0.00135677
K02584	Nif-specific regulatory protein	0.000324097	0.00175594	0.000840606	0.000149183	0.0309493	0.0271645	0.000640033	0.0153767
K13497	anthranilate synthase/phosphoribosyltransferase [EC:4.1.3.27 2.4.2.18]	0.000324097	0.00438985	0.00132095	0.000298366	0.0376706	0.043073	0.00096005	0.026457
K08174	MFS transporter, FHS family, glucose/mannose:H+ symporter	0.000324097	0	0	0	0	0	0.000213344	0.000226128
K00381	sulfite reductase (NADPH) hemoprotein beta-component [EC:1.8.1.2]	0.000324097	0	0.000120087	0.000149183	0.000625238	0	0.000320017	0.000226128
K09722	hypothetical protein	0.000324097	0.00153645	0.000120087	0.000745915	0	0.00105056	0.00128007	0.00226128
K05337	ferredoxin	0.000324097	0.000219493	0.0018013	0.000149183	0.00687762	0.00345185	0.000106672	0.00180903
K08369	MFS transporter, putative metabolite:H+ symporter	0.000324097	0.000658478	0.000120087	0	0.00187572	0.000450241	0.000320017	0.000226128
K06936		0.000324097	0.00285341	0	0.00462467	0.000468929	0.00195104	0.000746706	0.00271354
K05989	alpha-L-rhamnosidase [EC:3.2.1.40]	0.000324097	0.00219493	0.000480346	0.000447549	0.0048456	0.00735393	0.0057603	0.0185425
K01638	malate synthase [EC:2.3.3.9]	0.000324097	0.00131696	0.000480346	0.000149183	0.000781548	0.00105056	0	0.00135677
K00980	glycerol-3-phosphate cytidylyltransferase [EC:2.7.7.39]	0.000324097	0.000219493	0	0.00119346	0.00015631	0.000300161	0.000213344	0.000226128
K10441	ribose transport system ATP-binding protein [EC:3.6.3.17]	0.000324097	0.00438985	0.000840606	0.000447549	0.00203202	0.00240128	0.00256013	0.00565321
K02538	activator of the mannose operon, transcriptional antiterminator	0.000324097	0	0	0	0	0.00015008	0	0.000226128
K05939	acyl-[acyl-carrier-protein]-phospholipid O-acyltransferase / long-chain-fatty-acid--[acyl-carrier-protein] ligase [EC:2.3.1.40 6.2.1.20]	0.000324097	0.00153645	0.00036026	0.000298366	0.0572093	0.0496766	0.00170676	0.0223867
K03316	monovalent cation:H+ antiporter, CPA1 family	0.000324097	0.000219493	0.00036026	0	0.00703393	0.00015008	0.00117339	0.000226128
K12700	non-specific riboncleoside hydrolase [EC:3.2.-.-]	0.000324097	0.000219493	0	0	0	0	0	0
K11996	adenylyltransferase and sulfurtransferase	0.000324097	0.000219493	0.000240173	0.000298366	0.000312619	0.00015008	0.000106672	0
K00852	ribokinase [EC:2.7.1.15]	0.000324097	0.00460935	0.00120087	0.010592	0.00609607	0.00555297	0.00800042	0.0153767
K01916	NAD+ synthase [EC:6.3.1.5]	0.000324097	0.00373138	0.00108078	0.00671323	0.00312619	0.00480257	0.00533361	0.0101758
K06283	putative DeoR family transcriptional regulator, stage III sporulation protein D	0.000324097	0	0.0062445	0	0.000625238	0	0	0
K02398	negative regulator of flagellin synthesis FlgM	0.000324097	0	0.00564407	0.000447549	0.000625238	0.000300161	0.000320017	0.000226128
K05716	cyclic 2,3-diphosphoglycerate synthetase [EC:4.6.1.-]	0.000324097	0.00417036	0.000240173	0.0017902	0.000625238	0.00330177	0.00298682	0.00271354
K10542	methyl-galactoside transport system ATP-binding protein [EC:3.6.3.17]	0.000324097	0.000219493	0.000480346	0.000447549	0.00015631	0.000750401	0.000640033	0.000904513
K10552	fructose transport system substrate-binding protein	0.000324097	0.000219493	0	0	0	0	0	0
K01753	D-serine dehydratase [EC:4.3.1.18]	0.000324097	0.000219493	0	0	0.000468929	0	0.000213344	0.000226128
K13896	microcin C transport system ATP-binding protein	0.000324097	0.00219493	0.000600433	0.000447549	0.00250095	0.00105056	0.00213344	0.00271354
K06344	spore coat protein Z	0.000324097	0	0	0	0.00015631	0	0.000106672	0
K00958	sulfate adenylyltransferase [EC:2.7.7.4]	0.000324097	0.00109746	0.000600433	0.000895098	0.000625238	0.00105056	0.000640033	0.000904513
K04477	putative hydrolase	0.000324097	0	0.000960692	0.000149183	0	0.000300161	0.000213344	0.000452256
K00163	pyruvate dehydrogenase E1 component [EC:1.2.4.1]	0.000324097	0.00175594	0.00120087	0.000149183	0.000781548	0.00165088	0.000640033	0.00180903
K13527	proteasome-associated ATPase	0.000324097	0.000877971	0.000120087	0	0.00312619	0.000600321	0.000853378	0.000904513
K14107	energy-converting hydrogenase A subunit P	0.000324097	0.00351188	0.000480346	0.00537059	0.00296988	0.00390209	0.00394687	0.00565321
K07729	putative transcriptional regulator	0.000324097	0.000658478	0.00204147	0.000298366	0.00171941	0.000600321	0.000213344	0
K12452	CDP-6-deoxy-D-xylo-4-hexulose-3-dehydrase	0.000324097	0.00197543	0.000840606	0.000447549	0.000625238	0.00105056	0.000320017	0.0015829
K13953	alcohol dehydrogenase, propanol-preferring [EC:1.1.1.1]	0.000324097	0.00175594	0.000480346	0	0.0032825	0.0216116	0.0183476	0.0472608
K06878		0.000324097	0.00131696	0.000120087	0.000149183	0.00109417	0.00255136	0.000320017	0.000452256
K11738	L-asparagine permease	0.000324097	0	0.000240173	0.000149183	0.000937858	0	0.000106672	0.000678385
K01095	phosphatidylglycerophosphatase A [EC:3.1.3.27]	0.000324097	0.000219493	0	0	0.00609607	0.00240128	0	0.00113064
K03604	LacI family transcriptional regulator, purine nucleotide synthesis repressor	0.000324097	0.000219493	0.000840606	0.000149183	0.000468929	0.000300161	0	0.000904513
K12297	ribosomal RNA large subunit methyltransferase L [EC:2.1.1.173]	0.000324097	0.00175594	0.000720519	0.000149183	0.000781548	0.000300161	0.000106672	0.000678385
K00853	L-ribulokinase [EC:2.7.1.16]	0.000324097	0.000219493	0.000120087	0.000298366	0.000312619	0	0.000106672	0.000226128
K05873	adenylate cyclase, class 2 [EC:4.6.1.1]	0.000324097	0.000658478	0.00036026	0.00193938	0	0	0	0.000226128
K00573	protein-L-isoaspartate(D-aspartate) O-methyltransferase [EC:2.1.1.77]	0.000324097	0	0.00036026	0.000149183	0	0	0	0
K01449	N-acetylmuramoyl-L-alanine amidase [EC:3.5.1.28]	0.000324097	0	0.000720519	0.000149183	0.00015631	0	0.000106672	0.000452256
K02422	flagellar protein FliS	0.000324097	0	0.00900649	0.000298366	0.000625238	0.00015008	0.000320017	0.00135677
K10805	acyl-CoA thioesterase II [EC:3.1.2.-]	0.000324097	0.000658478	0.000240173	0	0.00281357	0.00015008	0.000853378	0.000904513
[truncated: 1,978 more rows]
