# Supplementary material
Source: publisher figshare collection journal article supplement (https://plos.figshare.com/articles/dataset/_/2585503)
Supplement: Supplementary file 1 [file 1 › S2 Table.pdf]

1 **Table S2. Functional microbial gene network clusters.** In a network analysis using  
2 BioLayout Express<sup>3D</sup> distinct functional clusters of microbial genes were identified based  
3 their relative abundances in the rumen samples from animals. The functional clusters 4 and 6  
4 contained most of the microbial genes associated with methane metabolism, whereas clusters  
5 2 and 5 included most of the genes related to feed conversion efficiency.

| KEGG-ID | Description                                            | Cluster |
|---------|--------------------------------------------------------|---------|
| K00005  | glycerol dehydrogenase [EC:1.1.1.6]                    | 1       |
| K00016  | L-lactate dehydrogenase [EC:1.1.1.27]                  | 1       |
|         | malate dehydrogenase (oxaloacetate-decarboxylating)    |         |
| K00027  | [EC:1.1.1.38]                                          | 1       |
| K00048  | lactaldehyde reductase [EC:1.1.1.77]                   | 1       |
| K00050  | hydroxypyruvate reductase [EC:1.1.1.81]                | 1       |
|         | glycerol-1-phosphate dehydrogenase [NAD(P)]            |         |
| K00096  | [EC:1.1.1.261]                                         | 1       |
| K00104  | glycolate oxidase [EC:1.1.3.15]                        | 1       |
| K00111  | glycerol-3-phosphate dehydrogenase [EC:1.1.5.3]        | 1       |
|         | succinate-semialdehyde dehydrogenase (NADP+)           |         |
| K00135  | [EC:1.2.1.16]                                          | 1       |
| K00248  | butyryl-CoA dehydrogenase [EC:1.3.99.2]                | 1       |
| K00260  | glutamate dehydrogenase [EC:1.4.1.2]                   | 1       |
| K00284  | glutamate synthase (ferredoxin) [EC:1.4.7.1]           | 1       |
| K00366  | ferredoxin-nitrite reductase [EC:1.7.7.1]              | 1       |
| K00370  | nitrate reductase 1, alpha subunit [EC:1.7.99.4]       | 1       |
| K00378  | hydroxylamine reductase [EC:1.7.-.-]                   | 1       |
| K00384  | thioredoxin reductase (NADPH) [EC:1.8.1.9]             | 1       |
| K00385  | anaerobic sulfite reductase subunit C [EC:1.8.1.-]     | 1       |
| K00533  | ferredoxin hydrogenase large subunit [EC:1.12.7.2]     | 1       |
| K00547  | homocysteine S-methyltransferase [EC:2.1.1.10]         | 1       |
| K00558  | DNA (cytosine-5-)-methyltransferase [EC:2.1.1.37]      | 1       |
|         | precorrin-6Y C5,15-methyltransferase / precorrin-8W    |         |
| K00595  | decarboxylase [EC:2.1.1.132 1.-.-.-]                   | 1       |
| K00603  | glutamate formiminotransferase [EC:2.1.2.5]            | 1       |
| K00616  | transaldolase [EC:2.2.1.2]                             | 1       |
| K00681  | gamma-glutamyltranspeptidase [EC:2.3.2.2]              | 1       |
| K00690  | sucrose phosphorylase [EC:2.4.1.7]                     | 1       |
| K00763  | nicotinate phosphoribosyltransferase [EC:2.4.2.11]     | 1       |
| K00784  | ribonuclease Z [EC:3.1.26.11]                          | 1       |
| K00788  | thiamine-phosphate pyrophosphorylase [EC:2.5.1.3]      | 1       |
| K00797  | spermidine synthase [EC:2.5.1.16]                      | 1       |
| K00805  | heptaprenyl diphosphate synthase [EC:2.5.1.30]         | 1       |
|         | acetylornithine/N-succinyldiaminopimelate              |         |
| K00821  | aminotransferase [EC:2.6.1.11 2.6.1.17]                | 1       |
| K00850  | 6-phosphofructokinase [EC:2.7.1.11]                    | 1       |
| K00878  | hydroxyethylthiazole kinase [EC:2.7.1.50]              | 1       |
| K00882  | 1-phosphofructokinase [EC:2.7.1.56]                    | 1       |
| K00891  | shikimate kinase [EC:2.7.1.71]                         | 1       |
|         | 4-diphosphocytidyl-2-C-methyl-D-erythritol kinase      |         |
| K00919  | [EC:2.7.1.148]                                         | 1       |
| K00926  | carbamate kinase [EC:2.7.2.2]                          | 1       |
| K00937  | polyphosphate kinase [EC:2.7.4.1]                      | 1       |
| K00954  | pantetheine-phosphate adenylyltransferase [EC:2.7.7.3] | 1       |

*Continued on next page*

Table S2 – Continued from previous page

|        |                                                                             |   |
|--------|-----------------------------------------------------------------------------|---|
| K00965 | UDPglucose--hexose-1-phosphate uridylyltransferase [EC:2.7.7.12]            | 1 |
| K00975 | glucose-1-phosphate adenylyltransferase [EC:2.7.7.27]                       | 1 |
| K00996 | undecaprenyl-phosphate galactose phosphotransferase [EC:2.7.8.6]            | 1 |
| K01008 | selenide, water dikinase [EC:2.7.9.3]                                       | 1 |
| K01039 | glutaconate CoA-transferase, subunit A [EC:2.8.3.12]                        | 1 |
| K01040 | glutaconate CoA-transferase, subunit B [EC:2.8.3.12]                        | 1 |
| K01077 | alkaline phosphatase [EC:3.1.3.1]                                           | 1 |
| K01091 | phosphoglycolate phosphatase [EC:3.1.3.18]                                  | 1 |
| K01126 | glycerophosphoryl diester phosphodiesterase [EC:3.1.4.46]                   | 1 |
| K01139 | guanosine-3',5'-bis(diphosphate) 3'-pyrophosphohydrolase [EC:3.1.7.2]       | 1 |
| K01151 | deoxyribonuclease IV [EC:3.1.21.2]                                          | 1 |
| K01153 | type I restriction enzyme, R subunit [EC:3.1.21.3]                          | 1 |
| K01155 | type II restriction enzyme [EC:3.1.21.4]                                    | 1 |
| K01163 | hypothetical protein                                                        | 1 |
| K01187 | alpha-glucosidase [EC:3.2.1.20]                                             | 1 |
| K01193 | beta-fructofuranosidase [EC:3.2.1.26]                                       | 1 |
| K01246 | DNA-3-methyladenine glycosylase I [EC:3.2.2.20]                             | 1 |
| K01258 | tripeptide aminopeptidase [EC:3.4.11.4]                                     | 1 |
| K01295 | glutamate carboxypeptidase [EC:3.4.17.11]                                   | 1 |
| K01304 | pyroglutamyl-peptidase [EC:3.4.19.3]                                        | 1 |
| K01421 | putative membrane protein                                                   | 1 |
| K01436 | aminoacylase [EC:3.5.1.14]                                                  | 1 |
| K01442 | choloylglycine hydrolase [EC:3.5.1.24]                                      | 1 |
| K01467 | beta-lactamase [EC:3.5.2.6]                                                 | 1 |
| K01468 | imidazolonepropionase [EC:3.5.2.7]                                          | 1 |
| K01480 | agmatinase [EC:3.5.3.11]                                                    | 1 |
| K01488 | adenosine deaminase [EC:3.5.4.4]                                            | 1 |
| K01514 | exopolyphosphatase [EC:3.6.1.11]                                            | 1 |
| K01515 | ADP-ribose pyrophosphatase [EC:3.6.1.13]                                    | 1 |
| K01531 | Mg <sup>2+</sup> -importing ATPase [EC:3.6.3.2]                             | 1 |
| K01533 | Cu <sup>2+</sup> -exporting ATPase [EC:3.6.3.4]                             | 1 |
| K01534 | Cd <sup>2+</sup> /Zn <sup>2+</sup> -exporting ATPase [EC:3.6.3.3 3.6.3.5]   | 1 |
| K01571 | oxaloacetate decarboxylase, alpha subunit [EC:4.1.1.3]                      | 1 |
| K01581 | ornithine decarboxylase [EC:4.1.1.17]                                       | 1 |
| K01615 | glutaconyl-CoA decarboxylase [EC:4.1.1.70]                                  | 1 |
| K01626 | 3-deoxy-7-phosphoheptulonate synthase [EC:2.5.1.54]                         | 1 |
| K01643 | citrate lyase subunit alpha / citrate CoA-transferase [EC:4.1.3.6 2.8.3.10] | 1 |
| K01644 | citrate lyase subunit beta / citryl-CoA lyase [EC:4.1.3.6 4.1.3.34]         | 1 |
| K01658 | anthranilate synthase component II [EC:4.1.3.27]                            | 1 |
| K01682 | aconitate hydratase 2 [EC:4.2.1.3]                                          | 1 |
| K01706 | glucarate dehydratase [EC:4.2.1.40]                                         | 1 |
| K01708 | galactarate dehydratase [EC:4.2.1.42]                                       | 1 |
| K01735 | 3-dehydroquinate synthase [EC:4.2.3.4]                                      | 1 |
| K01751 | diaminopropionate ammonia-lyase [EC:4.3.1.15]                               | 1 |
| K01754 | threonine dehydratase [EC:4.3.1.19]                                         | 1 |
| K01759 | lactoylglutathione lyase [EC:4.4.1.5]                                       | 1 |

Continued on next page

Table S2 – Continued from previous page

|        |                                                                                                                                               |   |
|--------|-----------------------------------------------------------------------------------------------------------------------------------------------|---|
| K01817 | phosphoribosylanthranilate isomerase [EC:5.3.1.24]                                                                                            | 1 |
| K01839 | phosphopentomutase [EC:5.4.2.7]                                                                                                               | 1 |
| K01878 | glycyl-tRNA synthetase alpha chain [EC:6.1.1.14]                                                                                              | 1 |
| K01879 | glycyl-tRNA synthetase beta chain [EC:6.1.1.14]                                                                                               | 1 |
| K01910 | [citrate (pro-3S)-lyase] ligase [EC:6.2.1.22]                                                                                                 | 1 |
| K01950 | NAD <sup>+</sup> synthase (glutamine-hydrolysing) [EC:6.3.5.1]<br>acetyl-CoA carboxylase, biotin carboxylase subunit<br>[EC:6.4.1.2 6.3.4.14] | 1 |
| K01961 |                                                                                                                                               | 1 |
| K01978 | M1 RNA                                                                                                                                        | 1 |
| K01989 | putative ABC transport system substrate-binding protein                                                                                       | 1 |
| K01992 | ABC-2 type transport system permease protein                                                                                                  | 1 |
| K01995 | branched-chain amino acid transport system ATP-binding<br>protein                                                                             | 1 |
| K01997 | branched-chain amino acid transport system permease<br>protein                                                                                | 1 |
| K01998 | branched-chain amino acid transport system permease<br>protein                                                                                | 1 |
| K02011 | iron(III) transport system permease protein                                                                                                   | 1 |
| K02012 | iron(III) transport system substrate-binding protein                                                                                          | 1 |
| K02013 | iron complex transport system ATP-binding protein<br>[EC:3.6.3.34]                                                                            | 1 |
| K02029 | polar amino acid transport system permease protein                                                                                            | 1 |
| K02036 | phosphate transport system ATP-binding protein<br>[EC:3.6.3.27]                                                                               | 1 |
| K02037 | phosphate transport system permease protein                                                                                                   | 1 |
| K02038 | phosphate transport system permease protein                                                                                                   | 1 |
| K02040 | phosphate transport system substrate-binding protein                                                                                          | 1 |
| K02114 | F-type H <sup>+</sup> -transporting ATPase subunit epsilon<br>[EC:3.6.3.14]                                                                   | 1 |
| K02227 | adenosylcobinamide-phosphate synthase CobD<br>[EC:6.3.1.10]                                                                                   | 1 |
| K02231 | adenosylcobinamide kinase / adenosylcobinamide-<br>phosphate guanylyltransferase [EC:2.7.1.156 2.7.7.62]                                      | 1 |
| K02233 | adenosylcobinamide-GDP ribazoletransferase [EC:2.7.8.26]                                                                                      | 1 |
| K02315 | DNA replication protein DnaC                                                                                                                  | 1 |
| K02334 | DNA polymerase bacteriophage-type [EC:2.7.7.7]                                                                                                | 1 |
| K02371 | enoyl-[acyl carrier protein] reductase II [EC:1.3.1.-]                                                                                        | 1 |
| K02392 | flagellar basal-body rod protein FlgG                                                                                                         | 1 |
| K02400 | flagellar biosynthesis protein FlhA                                                                                                           | 1 |
| K02406 | flagellin                                                                                                                                     | 1 |
| K02407 | flagellar hook-associated protein 2                                                                                                           | 1 |
| K02410 | flagellar motor switch protein FliG                                                                                                           | 1 |
| K02412 | flagellum-specific ATP synthase [EC:3.6.3.14]<br>aspartyl-tRNA(Asn)/glutamyl-tRNA (Gln)                                                       | 1 |
| K02435 | amidotransferase subunit C [EC:6.3.5.6 6.3.5.7]                                                                                               | 1 |
| K02438 | glycogen operon protein GlgX [EC:3.2.1.-]                                                                                                     | 1 |
| K02446 | fructose-1,6-bisphosphatase II [EC:3.1.3.11]                                                                                                  | 1 |
| K02471 | putative ATP-binding cassette transporter                                                                                                     | 1 |
| K02495 | oxygen-independent coproporphyrinogen III oxidase<br>[EC:1.3.99.22]                                                                           | 1 |
| K02499 | tetrapyrrole methylase family protein / MazG family protein                                                                                   | 1 |
| K02502 | ATP phosphoribosyltransferase regulatory subunit                                                                                              | 1 |

Continued on next page

Table S2 – Continued from previous page

|        |                                                                                                        |   |
|--------|--------------------------------------------------------------------------------------------------------|---|
| K02507 | protein transport protein HofQ                                                                         | 1 |
| K02529 | LacI family transcriptional regulator                                                                  | 1 |
| K02566 | NagD protein                                                                                           | 1 |
| K02647 | carbohydrate diacid regulator                                                                          | 1 |
| K02777 | PTS system, glucose-specific IIA component [EC:2.7.1.69]                                               | 1 |
| K02823 | dihydroorotate dehydrogenase electron transfer subunit                                                 | 1 |
| K02843 | heptosyltransferase II [EC:2.4.-.-]                                                                    | 1 |
| K03091 | RNA polymerase sporulation-specific sigma factor                                                       | 1 |
| K03149 | thiamine biosynthesis ThiG                                                                             | 1 |
| K03150 | thiamine biosynthesis ThiH                                                                             | 1 |
| K03151 | thiamine biosynthesis protein ThiI                                                                     | 1 |
|        | 4-methyl-5(b-hydroxyethyl)-thiazole monophosphate                                                      |   |
| K03152 | biosynthesis                                                                                           | 1 |
| K03205 | type IV secretion system protein VirD4                                                                 | 1 |
| K03216 | RNA methyltransferase, TrmH family, group 2 [EC:2.1.1.-]                                               | 1 |
| K03271 | phosphoheptose isomerase [EC:5.-.-]                                                                    | 1 |
|        | D-beta-D-heptose 7-phosphate kinase / D-beta-D-heptose 1-                                              |   |
| K03272 | phosphate adenosyltransferase [EC:2.7.1.- 2.7.7.-]                                                     | 1 |
|        | ADP-L-glycero-D-manno-heptose 6-epimerase                                                              |   |
| K03274 | [EC:5.1.3.20]                                                                                          | 1 |
| K03286 | OmpA-OmpF porin, OOP family                                                                            | 1 |
|        | glycoside/pentoside/hexuronide:cation symporter, GPH                                                   |   |
| K03292 | family                                                                                                 | 1 |
|        | citrate-Mg <sup>2+</sup> :H <sup>+</sup> or citrate-Ca <sup>2+</sup> :H <sup>+</sup> symporter, CitMHS |   |
| K03300 | family                                                                                                 | 1 |
| K03310 | alanine or glycine:cation symporter, AGCS family                                                       | 1 |
|        | branched-chain amino acid:cation transporter, LIVCS                                                    |   |
| K03311 | family                                                                                                 | 1 |
| K03312 | glutamate:Na <sup>+</sup> symporter, ESS family                                                        | 1 |
| K03319 | divalent anion:Na <sup>+</sup> symporter, DASS family                                                  | 1 |
| K03325 | arsenite transporter, ACR3 family                                                                      | 1 |
|        | peroxiredoxin (alkyl hydroperoxide reductase subunit C)                                                |   |
| K03386 | [EC:1.11.1.15]                                                                                         | 1 |
|        | precorrin-2/cobalt-factor-2 C20-methyltransferase                                                      |   |
| K03394 | [EC:2.1.1.130 2.1.1.151]                                                                               | 1 |
| K03406 | methyl-accepting chemotaxis protein                                                                    | 1 |
| K03431 | phosphoglucosamine mutase [EC:5.4.2.10]                                                                | 1 |
| K03438 | S-adenosyl-methyltransferase [EC:2.1.1.-]                                                              | 1 |
| K03471 | ribonuclease HIII [EC:3.1.26.4]                                                                        | 1 |
| K03498 | trk system potassium uptake protein TrkH                                                               | 1 |
| K03523 | putative biotin biosynthesis protein BioY                                                              | 1 |
|        | BirA family transcriptional regulator, biotin operon                                                   |   |
|        | repressor / biotin-[acetyl-CoA-carboxylase] ligase                                                     |   |
| K03524 | [EC:6.3.4.15]                                                                                          | 1 |
| K03525 | type III pantothenate kinase [EC:2.7.1.33]                                                             | 1 |
| K03536 | ribonuclease P protein component [EC:3.1.26.5]                                                         | 1 |
| K03543 | multidrug resistance protein A                                                                         | 1 |
| K03550 | holliday junction DNA helicase RuvA                                                                    | 1 |
| K03564 | peroxiredoxin Q/BCP [EC:1.11.1.15]                                                                     | 1 |
| K03565 | regulatory protein                                                                                     | 1 |
| K03609 | septum site-determining protein MinD                                                                   | 1 |

Continued on next page

*Table S2 – Continued from previous page*

|        |                                                                      |   |
|--------|----------------------------------------------------------------------|---|
| K03612 | electron transport complex protein RnfG                              | 1 |
| K03655 | ATP-dependent DNA helicase RecG [EC:3.6.4.12]                        | 1 |
| K03660 | N-glycosylase/DNA lyase [EC:3.2.2.- 4.2.99.18]                       | 1 |
| K03665 | GTP-binding protein HflX                                             | 1 |
| K03686 | molecular chaperone DnaJ                                             | 1 |
| K03688 | ubiquinone biosynthesis protein                                      | 1 |
| K03698 | CMP-binding protein                                                  | 1 |
| K03704 | cold shock protein (beta-ribbon, CspA family)                        | 1 |
| K03705 | heat-inducible transcriptional repressor                             | 1 |
| K03706 | transcriptional pleiotropic repressor                                | 1 |
| K03711 | Fur family transcriptional regulator, ferric uptake regulator        | 1 |
| K03734 | thiamine biosynthesis lipoprotein                                    | 1 |
| K03735 | ethanolamine ammonia-lyase large subunit [EC:4.3.1.7]                | 1 |
| K03741 | arsenate reductase [EC:1.20.4.1]                                     | 1 |
| K03763 | DNA polymerase III subunit alpha, Gram-positive type [EC:2.7.7.7]    | 1 |
| K03778 | D-lactate dehydrogenase [EC:1.1.1.28]                                | 1 |
| K03779 | L(+)-tartrate dehydratase alpha subunit [EC:4.2.1.32]                | 1 |
| K03780 | L(+)-tartrate dehydratase beta subunit [EC:4.2.1.32]                 | 1 |
| K03928 | carboxylesterase [EC:3.1.1.1]                                        | 1 |
| K04041 | fructose-1,6-bisphosphatase III [EC:3.1.3.11]                        | 1 |
| K04070 | putative pyruvate formate lyase activating enzyme [EC:1.97.1.4]      | 1 |
| K04485 | DNA repair protein RadA/Sms                                          | 1 |
| K04486 | histidinol-phosphatase (PHP family) [EC:3.1.3.15]                    | 1 |
| K04487 | cysteine desulfurase [EC:2.8.1.7]                                    | 1 |
| K04720 | threonine-phosphate decarboxylase [EC:4.1.1.81]                      | 1 |
| K04767 | acetoin utilization protein AcuB                                     | 1 |
| K05297 | rubredoxin-NAD <sup>+</sup> reductase [EC:1.18.1.1]                  | 1 |
| K05311 | central glycolytic genes regulator                                   | 1 |
| K05685 | macrolide transport system ATP-binding/permease protein [EC:3.6.3.-] | 1 |
| K05810 | conserved hypothetical protein                                       | 1 |
| K05832 | putative ABC transport system permease protein                       | 1 |
| K05833 | putative ABC transport system ATP-binding protein                    | 1 |
| K05837 | rod shape determining protein RodA                                   | 1 |
| K05896 | segregation and condensation protein A                               | 1 |
| K06013 | STE24 endopeptidase [EC:3.4.24.84]                                   | 1 |
| K06015 | N-acyl-D-amino-acid deacylase [EC:3.5.1.81]                          | 1 |
| K06016 | N-carbamoyl-L-amino-acid hydrolase [EC:3.5.1.87]                     | 1 |
| K06131 | cardiolipin synthase [EC:2.7.8.-]                                    | 1 |
| K06147 | ATP-binding cassette, subfamily B, bacterial                         | 1 |
| K06148 | ATP-binding cassette, subfamily C, bacterial                         | 1 |
| K06200 | carbon starvation protein                                            | 1 |
| K06201 | copper homeostasis protein                                           | 1 |
| K06207 | GTP-binding protein                                                  | 1 |
| K06213 | magnesium transporter                                                | 1 |
| K06223 | DNA adenine methylase [EC:2.1.1.72]                                  | 1 |
| K06310 | spore germination protein                                            | 1 |
| K06346 | spoIIIJ-associated protein                                           | 1 |
| K06390 | stage III sporulation protein AA                                     | 1 |

*Continued on next page*

*Table S2 – Continued from previous page*

|        |                                                                                                |   |
|--------|------------------------------------------------------------------------------------------------|---|
| K06399 | stage IV sporulation protein B [EC:3.4.21.116]                                                 | 1 |
| K06405 | stage V sporulation protein AC                                                                 | 1 |
| K06409 | stage V sporulation protein B                                                                  | 1 |
| K06442 | putative hemolysin                                                                             | 1 |
| K06902 | MFS transporter, UMF1 family                                                                   | 1 |
| K06958 | UPF0042 nucleotide-binding protein                                                             | 1 |
| K07010 | putative glutamine amidotransferase                                                            | 1 |
| K07023 | putative hydrolases of HD superfamily                                                          | 1 |
| K07160 | UPF0271 protein                                                                                | 1 |
| K07166 | ACT domain-containing protein                                                                  | 1 |
| K07216 | hemerythrin                                                                                    | 1 |
| K07240 | chromate transporter                                                                           | 1 |
| K07246 | tartrate dehydrogenase/decarboxylase / D-malate dehydrogenase [EC:1.1.1.93 4.1.1.73 1.1.1.83]  | 1 |
| K07258 | D-alanyl-D-alanine carboxypeptidase (penicillin-binding protein 5/6) [EC:3.4.16.4]             | 1 |
| K07279 | hypothetical protein                                                                           | 1 |
| K07282 | poly-gamma-glutamate synthesis protein (capsule biosynthesis protein)                          | 1 |
| K07301 | inner membrane protein                                                                         | 1 |
| K07319 | putative adenine-specific DNA-methyltransferase [EC:2.1.1.72]                                  | 1 |
| K07396 | putative protein-disulfide isomerase                                                           | 1 |
| K07402 | xanthine dehydrogenase accessory factor                                                        | 1 |
| K07447 | putative holliday junction resolvase [EC:3.1.-.-]                                              | 1 |
| K07456 | DNA mismatch repair protein MutS2                                                              | 1 |
| K07464 | putative RecB family exonuclease                                                               | 1 |
| K07473 | DNA-damage-inducible protein J                                                                 | 1 |
| K07567 | TdcF protein                                                                                   | 1 |
| K07576 | metallo-beta-lactamase family protein                                                          | 1 |
| K07642 | two-component system, OmpR family, sensor histidine kinase BaeS [EC:2.7.13.3]                  | 1 |
| K07657 | two-component system, OmpR family, phosphate regulon response regulator PhoB                   | 1 |
| K07665 | two-component system, OmpR family, copper resistance phosphate regulon response regulator CusR | 1 |
| K07718 | two-component system, sensor histidine kinase YesM [EC:2.7.13.3]                               | 1 |
| K07720 | two-component system, response regulator YesN                                                  | 1 |
| K07726 | putative transcriptional regulator                                                             | 1 |
| K07736 | CarD family transcriptional regulator                                                          | 1 |
| K07793 | putative tricarboxylic transport membrane protein                                              | 1 |
| K07979 | GntR family transcriptional regulator                                                          | 1 |
| K08384 | stage V sporulation protein D (sporulation-specific penicillin-binding protein)                | 1 |
| K08884 | serine/threonine protein kinase, bacterial [EC:2.7.11.1]                                       | 1 |
| K08974 | putative membrane protein                                                                      | 1 |
| K09137 | hypothetical protein                                                                           | 1 |
| K09685 | purine operon repressor                                                                        | 1 |
| K09687 | antibiotic transport system ATP-binding protein                                                | 1 |
| K09698 | nondiscriminating glutamyl-tRNA synthetase [EC:6.1.1.24]                                       | 1 |

*Continued on next page*

Table S2 – Continued from previous page

|        |                                                           |   |
|--------|-----------------------------------------------------------|---|
| K09729 | hypothetical protein                                      | 1 |
| K09759 | nondiscriminating aspartyl-tRNA synthetase [EC:6.1.1.23]  | 1 |
| K09762 | hypothetical protein                                      | 1 |
| K09767 | hypothetical protein                                      | 1 |
| K09773 | hypothetical protein                                      | 1 |
| K09788 | hypothetical protein                                      | 1 |
| K09800 | hypothetical protein                                      | 1 |
| K09815 | zinc transport system substrate-binding protein           | 1 |
| K09824 | hypothetical protein                                      | 1 |
|        | Fur family transcriptional regulator, peroxide stress     |   |
| K09825 | response regulator                                        | 1 |
| K09861 | hypothetical protein                                      | 1 |
| K09949 | hypothetical protein                                      | 1 |
| K10036 | glutamine transport system substrate-binding protein      | 1 |
| K10040 | putative glutamine transport system permease protein      | 1 |
|        | maltose/maltodextrin transport system substrate-binding   |   |
| K10108 | protein                                                   | 1 |
| K10109 | maltose/maltodextrin transport system permease protein    | 1 |
| K10110 | maltose/maltodextrin transport system permease protein    | 1 |
| K10117 | multiple sugar transport system substrate-binding protein | 1 |
| K10118 | multiple sugar transport system permease protein          | 1 |
| K10119 | multiple sugar transport system permease protein          | 1 |
|        | lactose/L-arabinose transport system substrate-binding    |   |
| K10188 | protein                                                   | 1 |
| K10541 | methyl-galactoside transport system permease protein      | 1 |
| K10806 | acyl-CoA thioesterase YciA [EC:3.1.2.-]                   | 1 |
|        | thiol peroxidase, atypical 2-Cys peroxiredoxin            |   |
| K11065 | [EC:1.11.1.15]                                            | 1 |
|        | spermidine/putrescine transport system substrate-binding  |   |
| K11069 | protein                                                   | 1 |
| K11070 | spermidine/putrescine transport system permease protein   | 1 |
| K11071 | spermidine/putrescine transport system permease protein   | 1 |
|        | spermidine/putrescine transport system ATP-binding        |   |
| K11072 | protein [EC:3.6.3.31]                                     | 1 |
| K11358 | aspartate aminotransferase [EC:2.6.1.1]                   | 1 |
|        | phosphoribosyl-ATP pyrophosphohydrolase /                 |   |
|        | phosphoribosyl-AMP cyclohydrolase [EC:3.6.1.31            |   |
| K11755 | 3.5.4.19]                                                 | 1 |
| K11900 | type VI secretion system protein ImpC                     | 1 |
| K11907 | type VI secretion system protein VasG                     | 1 |
| K12308 | beta-galactosidase [EC:3.2.1.23]                          | 1 |
|        | 2-C-methyl-D-erythritol 4-phosphate cytidyltransferase /  |   |
|        | 2-C-methyl-D-erythritol 2,4-cyclodiphosphate synthase     |   |
| K12506 | [EC:2.7.7.60 4.6.1.12]                                    | 1 |
| K12574 | ribonuclease J [EC:3.1.-.-]                               | 1 |
| K12940 | aminobenzoyl-glutamate utilization protein A              | 1 |
| K12941 | aminobenzoyl-glutamate utilization protein B              | 1 |
| K12942 | aminobenzoyl-glutamate transport protein                  | 1 |
| K13049 | carboxypeptidase PM20D1 [EC:3.4.17.-]                     | 1 |
|        | UDP-N-acetylglucosamine:undecaprenyl-P N-                 |   |
| K13685 | acetylglucosaminyl 1-P transferase [EC:2.7.8.-]           | 1 |

Continued on next page

Table S2 – Continued from previous page

|        |                                                                                      |   |
|--------|--------------------------------------------------------------------------------------|---|
| K13927 | holo-ACP synthase / triphosphoribosyl-dephospho-CoA synthase [EC:2.7.7.61 2.7.8.25]  | 1 |
| K13929 | malonate decarboxylase alpha subunit [EC:2.3.1.187]                                  | 1 |
| K14170 | chorismate mutase / prephenate dehydratase [EC:5.4.99.5 4.2.1.51]                    | 1 |
| K14260 | alanine-synthesizing transaminase [EC:2.6.1.66 2.6.1.2]                              | 1 |
| K14540 | ribosome biogenesis GTPase A                                                         | 1 |
| K15035 | transfer-messenger RNA                                                               | 1 |
| K15051 | DNA-entry nuclease                                                                   | 1 |
| K00014 | shikimate dehydrogenase [EC:1.1.1.25]                                                | 2 |
| K00075 | UDP-N-acetylmuramate dehydrogenase [EC:1.1.1.158]                                    | 2 |
| K00147 | glutamate-5-semialdehyde dehydrogenase [EC:1.2.1.41]                                 | 2 |
| K00243 | hypothetical protein                                                                 | 2 |
| K00286 | pyrroline-5-carboxylate reductase [EC:1.5.1.2]                                       | 2 |
| K00297 | methylenetetrahydrofolate reductase (NADPH) [EC:1.5.1.20]                            | 2 |
| K00375 | GntR family transcriptional regulator / MocR family aminotransferase                 | 2 |
| K00394 | adenylylsulfate reductase, subunit A [EC:1.8.99.2]                                   | 2 |
| K00548 | 5-methyltetrahydrofolate--homocysteine methyltransferase [EC:2.1.1.13]               | 2 |
| K00566 | tRNA-specific 2-thiouridylase [EC:2.8.1.-]                                           | 2 |
| K00620 | glutamate N-acetyltransferase / amino-acid N-acetyltransferase [EC:2.3.1.35 2.3.1.1] | 2 |
| K00655 | 1-acyl-sn-glycerol-3-phosphate acyltransferase [EC:2.3.1.51]                         | 2 |
| K00703 | starch synthase [EC:2.4.1.21]                                                        | 2 |
| K00783 | hypothetical protein                                                                 | 2 |
| K00790 | UDP-N-acetylglucosamine 1-carboxyvinyltransferase [EC:2.5.1.7]                       | 2 |
| K00793 | riboflavin synthase alpha chain [EC:2.5.1.9]                                         | 2 |
| K00859 | dephospho-CoA kinase [EC:2.7.1.24]                                                   | 2 |
| K00868 | pyridoxine kinase [EC:2.7.1.35]                                                      | 2 |
| K00930 | acetylglutamate/acetylaminoadipate kinase [EC:2.7.2.8 2.7.2.-]                       | 2 |
| K00941 | hydroxymethylpyrimidine/phosphomethylpyrimidine kinase [EC:2.7.1.49 2.7.4.7]         | 2 |
| K00956 | sulfate adenylyltransferase subunit 1 [EC:2.7.7.4]                                   | 2 |
| K00957 | sulfate adenylyltransferase subunit 2 [EC:2.7.7.4]                                   | 2 |
| K00969 | nicotinate-nucleotide adenylyltransferase [EC:2.7.7.18]                              | 2 |
| K00972 | UDP-N-acetylglucosamine pyrophosphorylase [EC:2.7.7.23]                              | 2 |
| K00974 | tRNA nucleotidyltransferase (CCA-adding enzyme) [EC:2.7.7.72 3.1.3.- 3.1.4.-]        | 2 |
| K00981 | phosphatidate cytidyltransferase [EC:2.7.7.41]                                       | 2 |
| K00998 | phosphatidylserine synthase [EC:2.7.8.8]                                             | 2 |
| K01000 | phospho-N-acetylmuramoyl-pentapeptide-transferase [EC:2.7.8.13]                      | 2 |
| K01012 | biotin synthetase [EC:2.8.1.6]                                                       | 2 |
| K01056 | peptidyl-tRNA hydrolase, PTH1 family [EC:3.1.1.29]                                   | 2 |
| K01142 | exodeoxyribonuclease III [EC:3.1.11.2]                                               | 2 |
| K01269 | aminopeptidase [EC:3.4.11.-]                                                         | 2 |

Continued on next page

Table S2 – Continued from previous page

|        |                                                             |   |
|--------|-------------------------------------------------------------|---|
| K01356 | repressor LexA [EC:3.4.21.88]                               | 2 |
| K01439 | succinyl-diaminopimelate desuccinylase [EC:3.5.1.18]        | 2 |
| K01462 | peptide deformylase [EC:3.5.1.88]                           | 2 |
| K01465 | dihydroorotase [EC:3.5.2.3]                                 | 2 |
| K01493 | dCMP deaminase [EC:3.5.4.12]                                | 2 |
| K01647 | citrate synthase [EC:2.3.3.1]                               | 2 |
| K01652 | acetolactate synthase I/II/III large subunit [EC:2.2.1.6]   | 2 |
| K01657 | anthranilate synthase component I [EC:4.1.3.27]             | 2 |
| K01662 | 1-deoxy-D-xylulose-5-phosphate synthase [EC:2.2.1.7]        | 2 |
| K01666 | 4-hydroxy 2-oxovalerate aldolase [EC:4.1.3.39]              | 2 |
| K01681 | aconitate hydratase 1 [EC:4.2.1.3]                          | 2 |
| K01687 | dihydroxy-acid dehydratase [EC:4.2.1.9]                     | 2 |
| K01736 | chorismate synthase [EC:4.2.3.5]                            | 2 |
|        | phosphoribosylformimino-5-aminoimidazole carboxamide        |   |
| K01814 | ribotide isomerase [EC:5.3.1.16]                            | 2 |
| K01924 | UDP-N-acetylmuramate--alanine ligase [EC:6.3.2.8]           | 2 |
|        | UDP-N-acetylmuramoylalanyl-D-glutamate--2,6-                |   |
| K01928 | diaminopimelate ligase [EC:6.3.2.13]                        | 2 |
| K01934 | 5-formyltetrahydrofolate cyclo-ligase [EC:6.3.3.2]          | 2 |
| K01956 | carbamoyl-phosphate synthase small subunit [EC:6.3.5.5]     | 2 |
| K01966 | propionyl-CoA carboxylase beta chain [EC:6.4.1.3]           | 2 |
| K02006 | cobalt/nickel transport system ATP-binding protein          | 2 |
| K02016 | iron complex transport system substrate-binding protein     | 2 |
| K02045 | sulfate transport system ATP-binding protein [EC:3.6.3.25]  | 2 |
| K02047 | sulfate transport system permease protein                   | 2 |
| K02048 | sulfate transport system substrate-binding protein          | 2 |
| K02071 | D-methionine transport system ATP-binding protein           | 2 |
| K02072 | D-methionine transport system permease protein              | 2 |
| K02073 | D-methionine transport system substrate-binding protein     | 2 |
|        | phosphoserine / homoserine phosphotransferase [EC:3.1.3.3   |   |
| K02203 | 2.7.1.39]                                                   | 2 |
| K02313 | chromosomal replication initiator protein                   | 2 |
| K02338 | DNA polymerase III subunit beta [EC:2.7.7.7]                | 2 |
| K02341 | DNA polymerase III subunit delta [EC:2.7.7.7]               | 2 |
| K02372 | 3R-hydroxymyristoyl ACP dehydrase [EC:4.2.1.-]              | 2 |
| K02517 | lipid A biosynthesis lauroyl acyltransferase [EC:2.3.1.-]   | 2 |
|        | leader peptidase (prepilin peptidase) / N-methyltransferase |   |
| K02654 | [EC:3.4.23.43 2.1.1.-]                                      | 2 |
| K02669 | twitching motility protein PilT                             | 2 |
| K02687 | ribosomal protein L11 methyltransferase [EC:2.1.1.-]        | 2 |
| K03073 | preprotein translocase subunit SecE                         | 2 |
| K03154 | sulfur carrier protein                                      | 2 |
| K03218 | RNA methyltransferase, TrmH family [EC:2.1.1.-]             | 2 |
| K03426 | NAD <sup>+</sup> diphosphatase [EC:3.6.1.22]                | 2 |
| K03437 | RNA methyltransferase, TrmH family                          | 2 |
| K03442 | small conductance mechanosensitive channel                  | 2 |
| K03453 | bile acid:Na <sup>+</sup> symporter, BASS family            | 2 |
| K03458 | nucleobase:cation symporter-2, NCS2 family                  | 2 |
| K03466 | DNA segregation ATPase FtsK/SpoIIIE, S-DNA-T family         | 2 |
| K03469 | ribonuclease HI [EC:3.1.26.4]                               | 2 |
| K03470 | ribonuclease HII [EC:3.1.26.4]                              | 2 |

Continued on next page

*Table S2 – Continued from previous page*

|        |                                                                |   |
|--------|----------------------------------------------------------------|---|
| K03495 | glucose inhibited division protein A                           | 2 |
|        | ribosomal RNA small subunit methyltransferase B                |   |
| K03500 | [EC:2.1.1.-]                                                   | 2 |
| K03529 | chromosome segregation protein                                 | 2 |
| K03546 | exonuclease SbcC                                               | 2 |
| K03581 | exodeoxyribonuclease V alpha subunit [EC:3.1.11.5]             | 2 |
| K03601 | exodeoxyribonuclease VII large subunit [EC:3.1.11.6]           | 2 |
| K03621 | glycerol-3-phosphate acyltransferase PlsX [EC:2.3.1.15]        | 2 |
| K03629 | DNA replication and repair protein RecF                        | 2 |
| K03631 | DNA repair protein RecN (Recombination protein N)              | 2 |
| K03650 | tRNA modification GTPase                                       | 2 |
|        | DNA helicase II / ATP-dependent DNA helicase PcrA              |   |
| K03657 | [EC:3.6.4.12]                                                  | 2 |
| K03664 | SsrA-binding protein                                           | 2 |
| K03671 | thioredoxin 1                                                  | 2 |
| K03703 | excinuclease ABC subunit C                                     | 2 |
|        | transcription-repair coupling factor (superfamily II helicase) |   |
| K03723 | [EC:3.6.4.-]                                                   | 2 |
| K03785 | 3-dehydroquinate dehydratase I [EC:4.2.1.10]                   | 2 |
| K03816 | xanthine phosphoribosyltransferase [EC:2.4.2.22]               | 2 |
|        | primosomal protein N (replication factor Y) (superfamily II    |   |
| K04066 | helicase) [EC:3.6.4.-]                                         | 2 |
| K04075 | tRNA(Ile)-lysine synthase [EC:6.3.4.-]                         | 2 |
| K04083 | molecular chaperone Hsp33                                      | 2 |
| K04758 | ferrous iron transport protein A                               | 2 |
| K04763 | integrase/recombinase XerD                                     | 2 |
| K06023 | HPr kinase/phosphorylase [EC:2.7.11.- 2.7.4.-]                 | 2 |
| K06133 | 4 -phosphopantetheinyl transferase [EC:2.7.8.-]                | 2 |
| K06158 | ATP-binding cassette, sub-family F, member 3                   | 2 |
|        | bifunctional enzyme involved in thiolation and methylation     |   |
| K06168 | of tRNA                                                        | 2 |
| K06173 | tRNA pseudouridine synthase A [EC:5.4.99.12]                   | 2 |
|        | ribosomal large subunit pseudouridine synthase C               |   |
| K06179 | [EC:5.4.99.12]                                                 | 2 |
|        | ribosomal small subunit pseudouridine synthase A               |   |
| K06183 | [EC:5.4.99.12]                                                 | 2 |
| K06187 | recombination protein RecR                                     | 2 |
| K06287 | septum formation protein                                       | 2 |
| K06381 | stage II sporulation protein D                                 | 2 |
| K06518 | holin-like protein                                             | 2 |
| K06925 | UPF0079 ATP-binding protein                                    | 2 |
|        | ribosomal RNA large subunit methyltransferase I                |   |
| K06969 | [EC:2.1.1.-]                                                   | 2 |
| K07040 | uncharacterized protein                                        | 2 |
| K07082 | UPF0755 protein                                                | 2 |
| K07238 | zinc transporter, ZIP family                                   | 2 |
| K07460 | putative endonuclease                                          | 2 |
| K07461 | putative endonuclease                                          | 2 |
| K07738 | transcriptional repressor NrdR                                 | 2 |
| K08303 | putative protease [EC:3.4.-.-]                                 | 2 |
| K08483 | phosphotransferase system, enzyme I, PtsI [EC:2.7.3.9]         | 2 |

*Continued on next page*

Table S2 – Continued from previous page

|        |                                                              |   |
|--------|--------------------------------------------------------------|---|
| K08591 | glycerol-3-phosphate acyltransferase PlsY [EC:2.3.1.15]      | 2 |
| K08602 | oligoendopeptidase F [EC:3.4.24.-]                           | 2 |
| K08681 | glutamine amidotransferase [EC:2.6.-.-]                      | 2 |
| K09117 | hypothetical protein                                         | 2 |
| K09686 | antibiotic transport system permease protein                 | 2 |
| K09710 | hypothetical protein                                         | 2 |
|        | ribosomal RNA small subunit methyltransferase E              |   |
| K09761 | [EC:2.1.1.-]                                                 | 2 |
| K09765 | hypothetical protein                                         | 2 |
| K09811 | cell division transport system permease protein              | 2 |
| K09816 | zinc transport system permease protein                       | 2 |
| K09817 | zinc transport system ATP-binding protein [EC:3.6.3.-]       | 2 |
| K09951 | CRISPR-associated protein Cas2                               | 2 |
| K10536 | agmatine deiminase [EC:3.5.3.12]                             | 2 |
| K10907 | aminotransferase [EC:2.6.1.-]                                | 2 |
|        | CRP/FNR family transcriptional regulator, cyclic AMP         |   |
| K10914 | receptor protein                                             | 2 |
| K11189 | phosphocarrier protein                                       | 2 |
|        | diaminohydroxyphosphoribosylaminopyrimidine deaminase        |   |
|        | / 5-amino-6-(5-phosphoribosylamino)uracil reductase          |   |
| K11752 | [EC:3.5.4.26 1.1.1.193]                                      | 2 |
|        | riboflavin kinase / FMN adenylyltransferase [EC:2.7.1.26     |   |
| K11753 | 2.7.7.2]                                                     | 2 |
|        | dihydrofolate synthase / folylpolyglutamate synthase         |   |
| K11754 | [EC:6.3.2.12 6.3.2.17]                                       | 2 |
| K11928 | sodium/proline symporter                                     | 2 |
| K12410 | NAD-dependent deacetylase [EC:3.5.1.-]                       | 2 |
|        | phosphatidylglycerol:prolipoprotein diacylglycerol           |   |
| K13292 | transferase [EC:2.-.-.-]                                     | 2 |
|        | uroporphyrinogen III methyltransferase / synthase            |   |
| K13542 | [EC:2.1.1.107 4.2.1.75]                                      | 2 |
| K14155 | cystathione beta-lyase [EC:4.4.1.8]                          | 2 |
| K14441 | ribosomal protein S12 methylthiotransferase [EC:2.-.-.-]     | 2 |
| K00012 | UDPGlucose 6-dehydrogenase [EC:1.1.1.22]                     | 3 |
| K00018 | glycerate dehydrogenase [EC:1.1.1.29]                        | 3 |
| K00259 | alanine dehydrogenase [EC:1.4.1.1]                           | 3 |
| K00282 | glycine dehydrogenase subunit 1 [EC:1.4.4.2]                 | 3 |
| K00426 | cytochrome bd-I oxidase subunit II [EC:1.10.3.-]             | 3 |
|        | phosphoribosylaminoimidazolecarboxamide                      |   |
|        | formyltransferase / IMP cyclohydrolase [EC:2.1.2.3           |   |
| K00602 | 3.5.4.10]                                                    | 3 |
|        | 3-methyl-2-oxobutanoate hydroxymethyltransferase             |   |
| K00606 | [EC:2.1.2.11]                                                | 3 |
| K00610 | aspartate carbamoyltransferase regulatory subunit            | 3 |
| K00648 | 3-oxoacyl-[acyl-carrier-protein] synthase III [EC:2.3.1.180] | 3 |
| K00684 | leucyl/phenylalanyl-tRNA--protein transferase [EC:2.3.2.6]   | 3 |
| K00757 | uridine phosphorylase [EC:2.4.2.3]                           | 3 |
| K00782 | hypothetical protein                                         | 3 |
| K00806 | undecaprenyl diphosphate synthase [EC:2.5.1.31]              | 3 |
| K00811 | aspartate aminotransferase [EC:2.6.1.1]                      | 3 |
| K00818 | acetylornithine aminotransferase [EC:2.6.1.11]               | 3 |
| K00848 | rhamnulokinase [EC:2.7.1.5]                                  | 3 |

Continued on next page

Table S2 – Continued from previous page

|        |                                                           |   |
|--------|-----------------------------------------------------------|---|
| K00857 | thymidine kinase [EC:2.7.1.21]                            | 3 |
| K00876 | uridine kinase [EC:2.7.1.48]                              | 3 |
| K00897 | aminoglycoside 3 -phosphotransferase [EC:2.7.1.95]        | 3 |
|        | 2-amino-4-hydroxy-6-hydroxymethyldihydropteridine         |   |
| K00950 | diphosphokinase [EC:2.7.6.3]                              | 3 |
| K00971 | mannose-1-phosphate guanylyltransferase [EC:2.7.7.22]     | 3 |
|        | 3-deoxy-manno-octulosonate cytidyltransferase (CMP-       |   |
| K00979 | KDO synthetase) [EC:2.7.7.38]                             | 3 |
| K01051 | pectinesterase [EC:3.1.1.11]                              | 3 |
| K01085 | glucose-1-phosphatase [EC:3.1.3.10]                       | 3 |
| K01119 | 2,3 -cyclic-nucleotide 2 -phosphodiesterase [EC:3.1.4.16] | 3 |
| K01154 | type I restriction enzyme, S subunit [EC:3.1.21.3]        | 3 |
| K01185 | lysozyme [EC:3.2.1.17]                                    | 3 |
| K01191 | alpha-mannosidase [EC:3.2.1.24]                           | 3 |
| K01206 | alpha-L-fucosidase [EC:3.2.1.51]                          | 3 |
|        | S-adenosylhomocysteine/5 -methylthioadenosine             |   |
| K01243 | nucleosidase [EC:3.2.2.9]                                 | 3 |
| K01256 | aminopeptidase N [EC:3.4.11.2]                            | 3 |
| K01277 | dipeptidyl-peptidase III [EC:3.4.14.4]                    | 3 |
| K01278 | dipeptidyl-peptidase 4 [EC:3.4.14.5]                      | 3 |
| K01297 | muramoyltetrapeptide carboxypeptidase [EC:3.4.17.13]      | 3 |
| K01372 | bleomycin hydrolase [EC:3.4.22.40]                        | 3 |
| K01438 | acetylornithine deacetylase [EC:3.5.1.16]                 | 3 |
| K01489 | cytidine deaminase [EC:3.5.4.5]                           | 3 |
| K01501 | nitrilase [EC:3.5.5.1]                                    | 3 |
| K01520 | dUTP pyrophosphatase [EC:3.6.1.23]                        | 3 |
| K01599 | uroporphyrinogen decarboxylase [EC:4.1.1.37]              | 3 |
| K01619 | deoxyribose-phosphate aldolase [EC:4.1.2.4]               | 3 |
| K01711 | GDPmannose 4,6-dehydratase [EC:4.2.1.47]                  | 3 |
| K01713 | prephenate dehydratase [EC:4.2.1.51]                      | 3 |
| K01719 | uroporphyrinogen-III synthase [EC:4.2.1.75]               | 3 |
| K01776 | glutamate racemase [EC:5.1.1.3]                           | 3 |
| K01785 | aldose 1-epimerase [EC:5.1.3.3]                           | 3 |
| K01790 | dTDP-4-dehydrorhamnose 3,5-epimerase [EC:5.1.3.13]        | 3 |
| K01809 | mannose-6-phosphate isomerase [EC:5.3.1.8]                | 3 |
| K01897 | long-chain acyl-CoA synthetase [EC:6.2.1.3]               | 3 |
| K01911 | O-succinylbenzoic acid--CoA ligase [EC:6.2.1.26]          | 3 |
| K01914 | aspartate--ammonia ligase [EC:6.3.1.1]                    | 3 |
| K01990 | ABC-2 type transport system ATP-binding protein           | 3 |
| K02005 | HlyD family secretion protein                             | 3 |
| K02014 | iron complex outermembrane receptor protein               | 3 |
| K02069 | putative ABC transport system permease protein            | 3 |
| K02335 | DNA polymerase I [EC:2.7.7.7]                             | 3 |
| K02340 | DNA polymerase III subunit delta [EC:2.7.7.7]             | 3 |
| K02346 | DNA polymerase IV [EC:2.7.7.7]                            | 3 |
| K02361 | isochorismate synthase [EC:5.4.4.2]                       | 3 |
| K02429 | MFS transporter, FHS family, L-fucose permease            | 3 |
| K02437 | glycine cleavage system H protein                         | 3 |
| K02549 | O-succinylbenzoate synthase [EC:4.2.1.113]                | 3 |
|        | 2-succinyl-5-enolpyruvyl-6-hydroxy-3-cyclohexene-1-       |   |
| K02551 | carboxylate synthase [EC:2.2.1.9]                         | 3 |

Continued on next page

*Table S2 – Continued from previous page*

|        |                                                                                                                                                   |   |
|--------|---------------------------------------------------------------------------------------------------------------------------------------------------|---|
| K02836 | peptide chain release factor RF-2                                                                                                                 | 3 |
| K02860 | 16S rRNA processing protein RimM                                                                                                                  | 3 |
| K02897 | large subunit ribosomal protein L25                                                                                                               | 3 |
| K02916 | large subunit ribosomal protein L35                                                                                                               | 3 |
| K03075 | preprotein translocase subunit SecE                                                                                                               | 3 |
| K03116 | sec-independent protein translocase protein TatA                                                                                                  | 3 |
| K03118 | sec-independent protein translocase protein TatC                                                                                                  | 3 |
| K03210 | preprotein translocase subunit YajC                                                                                                               | 3 |
| K03269 | UDP-2,3-diacetylglucosamine hydrolase [EC:3.6.1.-]<br>3-deoxy-D-manno-octulosonate 8-phosphate phosphatase<br>(KDO 8-P phosphatase) [EC:3.1.3.45] | 3 |
| K03270 | neurotransmitter:Na <sup>+</sup> symporter, NSS family                                                                                            | 3 |
| K03308 | Na <sup>+</sup> :H <sup>+</sup> antiporter, NhaC family                                                                                           | 3 |
| K03315 | transcriptional regulator of arginine metabolism                                                                                                  | 3 |
| K03402 | monovalent cation:H <sup>+</sup> antiporter-2, CPA2 family                                                                                        | 3 |
| K03455 | L-rhamnose mutarotase [EC:5.1.3.-]                                                                                                                | 3 |
| K03534 | exodeoxyribonuclease VII small subunit [EC:3.1.11.6]                                                                                              | 3 |
| K03602 | putative colanic acid biosynthesis UDP-glucose lipid<br>carrier transferase                                                                       | 3 |
| K03606 | N utilization substance protein B                                                                                                                 | 3 |
| K03625 | DNA repair protein RadC                                                                                                                           | 3 |
| K03630 | ribonuclease III [EC:3.1.26.3]                                                                                                                    | 3 |
| K03685 | Lrp/AsnC family transcriptional regulator, regulator for<br>asnA, asnC and gidA                                                                   | 3 |
| K03718 | integrase/recombinase XerC                                                                                                                        | 3 |
| K03733 | competence/damage-inducible protein CinA                                                                                                          | 3 |
| K03742 | FKBP-type peptidyl-prolyl cis-trans isomerase FklB<br>[EC:5.2.1.8]                                                                                | 3 |
| K03773 | 3-dehydroquinate dehydratase II [EC:4.2.1.10]                                                                                                     | 3 |
| K03786 | nicotinamide mononucleotide transporter                                                                                                           | 3 |
| K03811 | GTP-binding protein                                                                                                                               | 3 |
| K03979 | pyruvate formate lyase activating enzyme [EC:1.97.1.4]                                                                                            | 3 |
| K04069 | chorismate mutase [EC:5.4.99.5]                                                                                                                   | 3 |
| K04516 | nitrogen regulatory protein P-II 1                                                                                                                | 3 |
| K04751 | integration host factor subunit alpha                                                                                                             | 3 |
| K04764 | LacI family transcriptional regulator, repressor for deo<br>operon, udp, cdd, tsx, nupC, and nupG                                                 | 3 |
| K05499 | aminoglycoside 6-adenylyltransferase [EC:2.7.7.-]                                                                                                 | 3 |
| K05593 | tellurite resistance protein TerC                                                                                                                 | 3 |
| K05794 | sialate O-acetyltransferase [EC:3.1.1.53]                                                                                                         | 3 |
| K05970 | arabinose-5-phosphate isomerase [EC:5.3.1.13]                                                                                                     | 3 |
| K06041 | long-chain fatty acid transport protein                                                                                                           | 3 |
| K06076 | arabinan endo-1,5-alpha-L-arabinosidase [EC:3.2.1.99]                                                                                             | 3 |
| K06113 | PhnP protein                                                                                                                                      | 3 |
| K06167 | ribosomal large subunit pseudouridine synthase A<br>[EC:5.4.99.12]                                                                                | 3 |
| K06177 | ribosomal large subunit pseudouridine synthase D<br>[EC:5.4.99.12]                                                                                | 3 |
| K06180 | aquaporin Z                                                                                                                                       | 3 |
| K06188 | putative transport protein                                                                                                                        | 3 |
| K07085 | N-acetylmuramic acid 6-phosphate etherase [EC:4.2.-.-]                                                                                            | 3 |
| K07106 |                                                                                                                                                   | 3 |

*Continued on next page*

Table S2 – Continued from previous page

|        |                                                           |   |
|--------|-----------------------------------------------------------|---|
| K07114 | uncharacterized protein                                   | 3 |
| K07263 | zinc protease [EC:3.4.99.-]                               | 3 |
| K07271 | lipopolysaccharide cholinephosphotransferase [EC:2.7.8.-] | 3 |
| K07273 | lysozyme                                                  | 3 |
| K07334 | proteic killer suppression protein                        | 3 |
| K07444 | putative N6-adenine-specific DNA methylase [EC:2.1.1.-]   | 3 |
| K07462 | single-stranded-DNA-specific exonuclease [EC:3.1.-.-]     | 3 |
| K07636 | two-component system, OmpR family, phosphate regulon      | 3 |
| K07737 | sensor histidine kinase PhoR [EC:2.7.13.3]                | 3 |
| K07791 | putative transcriptional regulator                        | 3 |
| K07791 | anaerobic C4-dicarboxylate transporter DcuA               | 3 |
| K08218 | MFS transporter, PAT family, beta-lactamase induction     | 3 |
| K09125 | signal transducer AmpG                                    | 3 |
| K09680 | hypothetical protein                                      | 3 |
| K09704 | type II pantothenate kinase [EC:2.7.1.33]                 | 3 |
| K09973 | hypothetical protein                                      | 3 |
| K10947 | hypothetical protein                                      | 3 |
| K11068 | PadR family transcriptional regulator, regulatory protein | 3 |
| K11921 | PadR                                                      | 3 |
| K12373 | hemolysin III                                             | 3 |
| K00046 | LysR family transcriptional regulator                     | 3 |
| K00123 | hexosaminidase [EC:3.2.1.52]                              | 3 |
| K00125 | gluconate 5-dehydrogenase [EC:1.1.1.69]                   | 4 |
| K00150 | formate dehydrogenase, alpha subunit [EC:1.2.1.2]         | 4 |
| K00169 | formate dehydrogenase, beta subunit [EC:1.2.1.2]          | 4 |
| K00170 | glyceraldehyde-3-phosphate dehydrogenase (NAD(P))         | 4 |
| K00187 | [EC:1.2.1.59]                                             | 4 |
| K00200 | pyruvate ferredoxin oxidoreductase, alpha subunit         | 4 |
| K00201 | [EC:1.2.7.1]                                              | 4 |
| K00202 | pyruvate ferredoxin oxidoreductase, beta subunit          | 4 |
| K00203 | [EC:1.2.7.1]                                              | 4 |
| K00205 | 2-oxoisovalerate ferredoxin oxidoreductase, beta subunit  | 4 |
| K00399 | [EC:1.2.7.7]                                              | 4 |
| K00400 | formylmethanofuran dehydrogenase subunit A                | 4 |
| K00401 | [EC:1.2.99.5]                                             | 4 |
| K00402 | formylmethanofuran dehydrogenase subunit B                | 4 |
| K00440 | [EC:1.2.99.5]                                             | 4 |
| K00441 | formylmethanofuran dehydrogenase subunit C                | 4 |
| K00443 | [EC:1.2.99.5]                                             | 4 |
|        | formylmethanofuran dehydrogenase subunit D                | 4 |
|        | [EC:1.2.99.5]                                             | 4 |
|        | formylmethanofuran dehydrogenase subunit F                | 4 |
|        | [EC:1.2.99.5]                                             | 4 |
|        | methyl-coenzyme M reductase alpha subunit [EC:2.8.4.1]    | 4 |
|        | methyl coenzyme M reductase system, component A2          | 4 |
|        | methyl-coenzyme M reductase beta subunit [EC:2.8.4.1]     | 4 |
|        | methyl-coenzyme M reductase gamma subunit [EC:2.8.4.1]    | 4 |
|        | coenzyme F420 hydrogenase alpha subunit [EC:1.12.98.1]    | 4 |
|        | coenzyme F420 hydrogenase beta subunit [EC:1.12.98.1]     | 4 |
|        | coenzyme F420 hydrogenase gamma subunit                   | 4 |
|        | [EC:1.12.98.1]                                            | 4 |

Continued on next page

*Table S2 – Continued from previous page*

|        |                                                                                    |   |
|--------|------------------------------------------------------------------------------------|---|
| K00577 | tetrahydromethanopterin S-methyltransferase subunit A<br>[EC:2.1.1.86]             | 4 |
| K00580 | tetrahydromethanopterin S-methyltransferase subunit D<br>[EC:2.1.1.86]             | 4 |
| K00581 | tetrahydromethanopterin S-methyltransferase subunit E<br>[EC:2.1.1.86]             | 4 |
| K00584 | tetrahydromethanopterin S-methyltransferase subunit H<br>[EC:2.1.1.86]             | 4 |
| K00638 | chloramphenicol O-acetyltransferase [EC:2.3.1.28]                                  | 4 |
| K00672 | formylmethanofuran--tetrahydromethanopterin N-<br>formyltransferase [EC:2.3.1.101] | 4 |
| K00940 | nucleoside-diphosphate kinase [EC:2.7.4.6]                                         | 4 |
| K01007 | pyruvate, water dikinase [EC:2.7.9.2]                                              | 4 |
| K01079 | phosphoserine phosphatase [EC:3.1.3.3]                                             | 4 |
| K01499 | methenyltetrahydromethanopterin cyclohydrolase<br>[EC:3.5.4.27]                    | 4 |
| K01622 | fructose 1,6-bisphosphate aldolase/phosphatase<br>[EC:4.1.2.13 3.1.3.11]           | 4 |
| K01623 | fructose-bisphosphate aldolase, class I [EC:4.1.2.13]                              | 4 |
| K01823 | isopentenyl-diphosphate delta-isomerase [EC:5.3.3.2]                               | 4 |
| K01959 | pyruvate carboxylase subunit A [EC:6.4.1.1]                                        | 4 |
| K02007 | cobalt/nickel transport system permease protein                                    | 4 |
| K02009 | cobalt transport protein                                                           | 4 |
| K02030 | polar amino acid transport system substrate-binding protein                        | 4 |
| K02118 | V-type H <sup>+</sup> -transporting ATPase subunit B [EC:3.6.3.14]                 | 4 |
| K02119 | V-type H <sup>+</sup> -transporting ATPase subunit C [EC:3.6.3.14]                 | 4 |
| K02121 | V-type H <sup>+</sup> -transporting ATPase subunit E [EC:3.6.3.14]                 | 4 |
| K02122 | V-type H <sup>+</sup> -transporting ATPase subunit F [EC:3.6.3.14]                 | 4 |
| K02123 | V-type H <sup>+</sup> -transporting ATPase subunit I [EC:3.6.3.14]                 | 4 |
| K02124 | V-type H <sup>+</sup> -transporting ATPase subunit K [EC:3.6.3.14]                 | 4 |
| K02217 | ferritin [EC:1.16.3.1]                                                             | 4 |
| K02319 | DNA polymerase I [EC:2.7.7.7]                                                      | 4 |
| K02322 | DNA polymerase II large subunit [EC:2.7.7.7]                                       | 4 |
| K02323 | DNA polymerase II small subunit [EC:2.7.7.7]                                       | 4 |
| K02585 | nitrogen fixation protein NifB                                                     | 4 |
| K02877 | large subunit ribosomal protein L15e                                               | 4 |
| K02885 | large subunit ribosomal protein L19e                                               | 4 |
| K02908 | large subunit ribosomal protein L30e                                               | 4 |
| K02912 | large subunit ribosomal protein L32e                                               | 4 |
| K02915 | large subunit ribosomal protein L34e                                               | 4 |
| K02930 | large subunit ribosomal protein L4e                                                | 4 |
| K02979 | small subunit ribosomal protein S28e                                               | 4 |
| K02984 | small subunit ribosomal protein S3Ae                                               | 4 |
| K02987 | small subunit ribosomal protein S4e                                                | 4 |
| K03041 | DNA-directed RNA polymerase subunit A [EC:2.7.7.6]                                 | 4 |
| K03042 | DNA-directed RNA polymerase subunit A [EC:2.7.7.6]                                 | 4 |
| K03044 | DNA-directed RNA polymerase subunit B [EC:2.7.7.6]                                 | 4 |
| K03045 | DNA-directed RNA polymerase subunit B [EC:2.7.7.6]                                 | 4 |
| K03047 | DNA-directed RNA polymerase subunit D [EC:2.7.7.6]                                 | 4 |
| K03049 | DNA-directed RNA polymerase subunit E [EC:2.7.7.6]                                 | 4 |
| K03113 | translation initiation factor eIF-1                                                | 4 |

*Continued on next page*

*Table S2 – Continued from previous page*

|        |                                                                                                      |   |
|--------|------------------------------------------------------------------------------------------------------|---|
|        | transcription initiation factor TFIID TATA-box-binding protein                                       | 4 |
| K03120 | transcription initiation factor TFIIB                                                                | 4 |
| K03124 | DNA topoisomerase VI subunit A [EC:5.99.1.3]                                                         | 4 |
| K03166 | DNA topoisomerase VI subunit B [EC:5.99.1.3]                                                         | 4 |
| K03167 | elongation factor EF-2 [EC:3.6.5.3]                                                                  | 4 |
| K03234 | translation initiation factor eIF-1A                                                                 | 4 |
| K03236 | translation initiation factor eIF-2 alpha subunit                                                    | 4 |
| K03237 | translation initiation factor eIF-2 gamma subunit                                                    | 4 |
| K03242 | peptide chain release factor eRF subunit 1                                                           | 4 |
| K03265 | heterodisulfide reductase subunit A [EC:1.8.98.1]                                                    | 4 |
| K03388 | heterodisulfide reductase subunit C [EC:1.8.98.1]                                                    | 4 |
| K03390 | proteasome regulatory subunit                                                                        | 4 |
| K03420 | methyl-coenzyme M reductase subunit C                                                                | 4 |
| K03421 | proteasome alpha subunit [EC:3.4.25.1]                                                               | 4 |
| K03432 | proteasome beta subunit [EC:3.4.25.1]                                                                | 4 |
| K03433 | cell division protein FtsZ                                                                           | 4 |
| K03531 | exosome complex component RRP4                                                                       | 4 |
| K03679 | molybdopterin biosynthesis protein MoeA                                                              | 4 |
| K03750 | Lon-like ATP-dependent protease [EC:3.4.21.-]                                                        | 4 |
| K04076 | DNA repair protein RadA                                                                              | 4 |
| K04483 | lysyl-tRNA synthetase, class I [EC:6.1.1.6]                                                          | 4 |
| K04566 | hydrogenase expression/formation protein HypD                                                        | 4 |
| K04654 | hydrogenase expression/formation protein HypE                                                        | 4 |
| K04655 | hydrogenase maturation protein HypF                                                                  | 4 |
| K04656 | (R)-2-hydroxyacid dehydrogenase [EC:1.1.1.272]                                                       | 4 |
| K05884 | precorrin-8X methylmutase [EC:5.4.1.2]                                                               | 4 |
| K06042 | ATP-binding cassette, sub-family E, member 1                                                         | 4 |
| K06174 | 5-formaminoimidazole-4-carboxamide-1-(beta)-D-ribofuranosyl 5'-monophosphate synthetase [EC:6.3.4.-] | 4 |
| K06863 | hydrogenase expression/formation protein                                                             | 4 |
| K07388 | archaea-specific RecJ-like exonuclease                                                               | 4 |
| K07463 | putative RNA-binding protein containing KH domain                                                    | 4 |
| K07574 | GTP cyclohydrolase IIa [EC:3.5.4.29]                                                                 | 4 |
| K08096 | methylthioribose-1-phosphate isomerase [EC:5.3.1.23]                                                 | 4 |
| K08963 | hypothetical protein                                                                                 | 4 |
| K09123 | hypothetical protein                                                                                 | 4 |
| K09142 | hypothetical protein                                                                                 | 4 |
| K09154 | hypothetical protein                                                                                 | 4 |
| K09181 | glutamyl-tRNA(Gln) amidotransferase subunit D [EC:6.3.5.7]                                           | 4 |
| K09482 | hypothetical protein                                                                                 | 4 |
| K09726 | archaeal cell division control protein 6                                                             | 4 |
| K10725 | replicative DNA helicase Mcm [EC:3.6.4.-]                                                            | 4 |
| K10726 | DNA ligase 1 [EC:6.5.1.1]                                                                            | 4 |
| K10747 | exosome complex component RRP41                                                                      | 4 |
| K11600 | FO synthase subunit 1 [EC:2.5.1.-]                                                                   | 4 |
| K11780 | transitional endoplasmic reticulum ATPase                                                            | 4 |
| K13525 | bifunctional enzyme Fae/Hps [EC:4.3.-.- 4.1.2.43]                                                    | 4 |
| K13812 | 5,10-methenyltetrahydromethanopterin hydrogenase [EC:1.12.98.2]                                      | 4 |
| K13942 |                                                                                                      | 4 |

*Continued on next page*

Table S2 – Continued from previous page

|        |                                                                                     |   |
|--------|-------------------------------------------------------------------------------------|---|
| K14101 | energy-converting hydrogenase A subunit J                                           | 4 |
| K14105 | energy-converting hydrogenase A subunit N                                           | 4 |
| K14106 | energy-converting hydrogenase A subunit O                                           | 4 |
| K14123 | energy-converting hydrogenase B subunit N                                           | 4 |
| K14126 | F420-non-reducing hydrogenase subunit A [EC:1.12.99.-]                              | 4 |
| K14128 | F420-non-reducing hydrogenase subunit G [EC:1.12.99.-]                              | 4 |
| K00001 | alcohol dehydrogenase [EC:1.1.1.1]                                                  | 5 |
| K00003 | homoserine dehydrogenase [EC:1.1.1.3]                                               | 5 |
| K00029 | malate dehydrogenase (oxaloacetate-decarboxylating)(NADP+) [EC:1.1.1.40]            | 5 |
| K00067 | dTDP-4-dehydrorhamnose reductase [EC:1.1.1.133]                                     | 5 |
| K00077 | 2-dehydropantoate 2-reductase [EC:1.1.1.169]                                        | 5 |
| K00128 | aldehyde dehydrogenase (NAD+) [EC:1.2.1.3]                                          | 5 |
| K00336 | NADH dehydrogenase I subunit G [EC:1.6.5.3]                                         | 5 |
| K00337 | NADH dehydrogenase I subunit H [EC:1.6.5.3]                                         | 5 |
| K00343 | NADH dehydrogenase I subunit N [EC:1.6.5.3]                                         | 5 |
| K00549 | 5-methyltetrahydropteroyltriglutamate--homocysteine methyltransferase [EC:2.1.1.14] | 5 |
| K00554 | tRNA (guanine-N1-)-methyltransferase [EC:2.1.1.31]                                  | 5 |
| K00567 | methylated-DNA-[protein]-cysteine S-methyltransferase [EC:2.1.1.63]                 | 5 |
| K00767 | nicotinate-nucleotide pyrophosphorylase (carboxylating) [EC:2.4.2.19]               | 5 |
| K00773 | queuine tRNA-ribosyltransferase [EC:2.4.2.29]                                       | 5 |
| K00796 | dihydropteroate synthase [EC:2.5.1.15]                                              | 5 |
| K00817 | histidinol-phosphate aminotransferase [EC:2.6.1.9]                                  | 5 |
| K00833 | adenosylmethionine-8-amino-7-oxononanoate aminotransferase [EC:2.6.1.62]            | 5 |
| K00989 | ribonuclease PH [EC:2.7.7.56]                                                       | 5 |
| K00995 | CDP-diacylglycerol--glycerol-3-phosphate 3-phosphatidyltransferase [EC:2.7.8.5]     | 5 |
| K01092 | myo-inositol-1(or 4)-monophosphatase [EC:3.1.3.25]                                  | 5 |
| K01104 | protein-tyrosine phosphatase [EC:3.1.3.48]                                          | 5 |
| K01129 | dGTPase [EC:3.1.5.1]                                                                | 5 |
| K01159 | crossover junction endodeoxyribonuclease RuvC [EC:3.1.22.4]                         | 5 |
| K01179 | endoglucanase [EC:3.2.1.4]                                                          | 5 |
| K01207 | beta-N-acetylhexosaminidase [EC:3.2.1.52]                                           | 5 |
| K01224 | arabinogalactan endo-1,4-beta-galactosidase [EC:3.2.1.89]                           | 5 |
| K01424 | L-asparaginase [EC:3.5.1.1]                                                         | 5 |
| K01572 | oxaloacetate decarboxylase, beta subunit [EC:4.1.1.3]                               | 5 |
| K01579 | aspartate 1-decarboxylase [EC:4.1.1.11]                                             | 5 |
| K01613 | phosphatidylserine decarboxylase [EC:4.1.1.65]                                      | 5 |
| K01689 | enolase [EC:4.2.1.11]                                                               | 5 |
| K01693 | imidazoleglycerol-phosphate dehydratase [EC:4.2.1.19]                               | 5 |
| K01698 | porphobilinogen synthase [EC:4.2.1.24]                                              | 5 |
| K01745 | histidine ammonia-lyase [EC:4.3.1.3]                                                | 5 |
| K01760 | cystathionine beta-lyase [EC:4.4.1.8]                                               | 5 |
| K01807 | ribose 5-phosphate isomerase A [EC:5.3.1.6]                                         | 5 |
| K01845 | glutamate-1-semialdehyde 2,1-aminomutase [EC:5.4.3.8]                               | 5 |
| K01915 | glutamine synthetase [EC:6.3.1.2]                                                   | 5 |

Continued on next page

*Table S2 – Continued from previous page*

|        |                                                                         |   |
|--------|-------------------------------------------------------------------------|---|
| K01993 | HlyD family secretion protein                                           | 5 |
| K02050 | sulfonate/nitrate/taurine transport system permease protein             | 5 |
| K02065 | putative ABC transport system ATP-binding protein                       | 5 |
| K02066 | putative ABC transport system permease protein                          | 5 |
| K02067 | putative ABC transport system substrate-binding protein                 | 5 |
| K02237 | competence protein ComEA                                                | 5 |
| K02238 | competence protein ComEC                                                | 5 |
| K02343 | DNA polymerase III subunit gamma/tau [EC:2.7.7.7]                       | 5 |
| K02454 | general secretion pathway protein E                                     | 5 |
| K02492 | glutamyl-tRNA reductase [EC:1.2.1.70]                                   | 5 |
| K02586 | nitrogenase molybdenum-iron protein alpha chain<br>[EC:1.18.6.1]        | 5 |
| K02588 | nitrogenase iron protein NifH [EC:1.18.6.1]                             | 5 |
|        | nitrogenase molybdenum-iron protein beta chain<br>[EC:1.18.6.1]         | 5 |
| K02591 | type IV pilus assembly protein PilB                                     | 5 |
| K02652 | RNA polymerase sigma-54 factor                                          | 5 |
| K03092 | signal peptidase II [EC:3.4.23.36]                                      | 5 |
| K03101 | single-strand DNA-binding protein                                       | 5 |
| K03111 | DNA topoisomerase III [EC:5.99.1.2]                                     | 5 |
| K03169 | ubiquinone/menaquinone biosynthesis methyltransferase<br>[EC:2.1.1.-]   | 5 |
| K03183 | hydrophobic/amphiphilic exporter-1 (mainly G- bacteria),<br>HAE1 family | 5 |
| K03296 | sulfate permease, SulP family                                           | 5 |
| K03321 | multidrug resistance protein, MATE family                               | 5 |
| K03327 | TatD DNase family protein [EC:3.1.21.-]                                 | 5 |
| K03424 | tRNA (guanine-N7-)-methyltransferase [EC:2.1.1.33]                      | 5 |
| K03439 | glucose inhibited division protein B [EC:2.1.-.-]                       | 5 |
| K03501 | biopolymer transport protein ExbD                                       | 5 |
| K03559 | rod shape-determining protein MreC                                      | 5 |
| K03570 | 7,8-dihydro-8-oxoguanine triphosphatase [EC:3.6.1.-]                    | 5 |
| K03574 | cell division protein FtsQ                                              | 5 |
| K03589 | ATP-binding protein involved in chromosome partitioning                 | 5 |
| K03593 | molecular chaperone GrpE                                                | 5 |
| K03687 | LemA protein                                                            | 5 |
| K03744 | peptidyl-prolyl cis-trans isomerase D [EC:5.2.1.8]                      | 5 |
| K03770 | peptidyl-prolyl cis-trans isomerase SurA [EC:5.2.1.8]                   | 5 |
| K03771 | 5 -nucleotidase [EC:3.1.3.5]                                            | 5 |
| K03787 | heat shock protein HtpX [EC:3.4.24.-]                                   | 5 |
| K03799 | MoxR-like ATPase [EC:3.6.3.-]                                           | 5 |
| K03924 | glucose inhibited division protein Gid                                  | 5 |
| K04094 | DNA processing protein                                                  | 5 |
| K04096 | ATP-dependent RNA helicase DeaD [EC:3.6.4.13]                           | 5 |
| K05592 | undecaprenyl-diphosphatase [EC:3.6.1.27]                                | 5 |
| K06153 | probable rRNA maturation factor                                         | 5 |
| K07042 | flotillin                                                               | 5 |
| K07192 | magnesium chelatase family protein                                      | 5 |
| K07391 | alpha-galactosidase [EC:3.2.1.22]                                       | 5 |
| K07407 | DNA mismatch endonuclease, patch repair protein<br>[EC:3.1.-.-]         | 5 |
| K07458 |                                                                         | 5 |

*Continued on next page*

*Table S2 – Continued from previous page*

|        |                                                                                             |   |
|--------|---------------------------------------------------------------------------------------------|---|
| K07566 | putative translation factor                                                                 | 5 |
| K07668 | two-component system, OmpR family, response regulator<br>VicR                               | 5 |
| K07712 | two-component system, NtrC family, nitrogen regulation<br>response regulator GlnG           | 5 |
| K07776 | two-component system, OmpR family, response regulator<br>RegX3                              | 5 |
| K08309 | soluble lytic murein transglycosylase [EC:3.2.1.-]                                          | 5 |
| K08641 | D-alanyl-D-alanine dipeptidase [EC:3.4.13.-]                                                | 5 |
| K08998 | hypothetical protein                                                                        | 5 |
| K09747 | hypothetical protein                                                                        | 5 |
| K09808 | lipoprotein-releasing system permease protein                                               | 5 |
| K09810 | lipoprotein-releasing system ATP-binding protein<br>[EC:3.6.3.-]                            | 5 |
| K10026 | queuosine biosynthesis protein QueE                                                         | 5 |
| K11717 | cysteine desulfurase / selenocysteine lyase [EC:2.8.1.7<br>4.4.1.16]                        | 5 |
| K00172 | pyruvate ferredoxin oxidoreductase, gamma subunit<br>[EC:1.2.7.1]                           | 6 |
| K00319 | methylenetetrahydromethanopterin dehydrogenase<br>[EC:1.5.99.9]                             | 6 |
| K00320 | coenzyme F420-dependent N5,N10-<br>methenyltetrahydromethanopterin reductase [EC:1.5.99.11] | 6 |
| K00583 | tetrahydromethanopterin S-methyltransferase subunit G<br>[EC:2.1.1.86]                      | 6 |
| K01516 | nucleoside-triphosphatase [EC:3.6.1.15]                                                     | 6 |
| K01854 | UDP-galactopyranose mutase [EC:5.4.99.9]                                                    | 6 |
| K01933 | phosphoribosylformylglycinamide cyclo-ligase<br>[EC:6.3.3.1]                                | 6 |
| K01985 | 5S ribosomal RNA                                                                            | 6 |
| K02120 | V-type H <sup>+</sup> -transporting ATPase subunit D [EC:3.6.3.14]                          | 6 |
| K02224 | cobyrinic acid a,c-diamide synthase [EC:6.3.5.9 6.3.1.-]                                    | 6 |
| K02427 | ribosomal RNA large subunit methyltransferase E<br>[EC:2.1.1.-]                             | 6 |
| K02440 | glycerol uptake facilitator protein                                                         | 6 |
| K02866 | large subunit ribosomal protein L10e                                                        | 6 |
| K02869 | large subunit ribosomal protein L12                                                         | 6 |
| K02875 | large subunit ribosomal protein L14e                                                        | 6 |
| K02883 | large subunit ribosomal protein L18e                                                        | 6 |
| K02896 | large subunit ribosomal protein L24e                                                        | 6 |
| K02904 | large subunit ribosomal protein L29                                                         | 6 |
| K02910 | large subunit ribosomal protein L31e                                                        | 6 |
| K02921 | large subunit ribosomal protein L37Ae                                                       | 6 |
| K02922 | large subunit ribosomal protein L37e                                                        | 6 |
| K02924 | large subunit ribosomal protein L39e                                                        | 6 |
| K02927 | large subunit ribosomal protein L40e                                                        | 6 |
| K02929 | large subunit ribosomal protein L44e                                                        | 6 |
| K02936 | large subunit ribosomal protein L7Ae                                                        | 6 |
| K02948 | small subunit ribosomal protein S11                                                         | 6 |
| K02950 | small subunit ribosomal protein S12                                                         | 6 |
| K02952 | small subunit ribosomal protein S13                                                         | 6 |
| K02962 | small subunit ribosomal protein S17e                                                        | 6 |

*Continued on next page*

*Table S2 – Continued from previous page*

|        |                                                                                        |   |
|--------|----------------------------------------------------------------------------------------|---|
| K02966 | small subunit ribosomal protein S19e                                                   | 6 |
| K02977 | small subunit ribosomal protein S27Ae                                                  | 6 |
| K02978 | small subunit ribosomal protein S27e                                                   | 6 |
| K02991 | small subunit ribosomal protein S6e                                                    | 6 |
| K02994 | small subunit ribosomal protein S8                                                     | 6 |
| K02995 | small subunit ribosomal protein S8e                                                    | 6 |
| K03056 | DNA-directed RNA polymerase subunit L [EC:2.7.7.6]                                     | 6 |
| K03058 | DNA-directed RNA polymerase subunit N [EC:2.7.7.6]                                     | 6 |
| K03231 | elongation factor EF-1 alpha subunit [EC:3.6.5.3]                                      | 6 |
| K03238 | translation initiation factor eIF-2 beta subunit                                       | 6 |
| K03263 | translation initiation factor eIF-5A                                                   | 6 |
| K03389 | heterodisulfide reductase subunit B [EC:1.8.98.1]                                      | 6 |
| K03538 | ribonuclease P protein subunit POP4 [EC:3.1.26.5]                                      | 6 |
| K03540 | ribonuclease P protein subunit RPR2 [EC:3.1.26.5]                                      | 6 |
| K03768 | peptidyl-prolyl cis-trans isomerase B (cyclophilin B)<br>[EC:5.2.1.8]                  | 6 |
| K03775 | FKBP-type peptidyl-prolyl cis-trans isomerase SlyD<br>[EC:5.2.1.8]                     | 6 |
| K04796 | small nuclear ribonucleoprotein                                                        | 6 |
| K04797 | prefoldin alpha subunit                                                                | 6 |
| K04802 | proliferating cell nuclear antigen                                                     | 6 |
| K06891 | ATP-dependent Clp protease adaptor protein ClpS                                        | 6 |
| K06941 | ribosomal RNA large subunit methyltransferase N<br>[EC:2.1.1.-]                        | 6 |
| K06961 | ribosomal RNA assembly protein                                                         | 6 |
| K07107 | acyl-CoA thioester hydrolase [EC:3.1.2.-]                                              | 6 |
| K07580 | hypothetical protein                                                                   | 6 |
| K07582 | hypothetical protein                                                                   | 6 |
| K07721 | ArsR family transcriptional regulator                                                  | 6 |
| K09007 | hypothetical protein                                                                   | 6 |
| K09735 | hypothetical protein                                                                   | 6 |
| K09858 | SEC-C motif domain protein                                                             | 6 |
| K11176 | IMP cyclohydrolase [EC:3.5.4.10]                                                       | 6 |
| K14124 | energy-converting hydrogenase B subunit O                                              | 6 |
| K14127 | F420-non-reducing hydrogenase iron-sulfur subunit D<br>[EC:1.12.99.-]                  | 6 |
| K14230 | tRNA Met                                                                               | 6 |
| K00134 | glyceraldehyde 3-phosphate dehydrogenase [EC:1.2.1.12]                                 | 7 |
| K00174 | 2-oxoglutarate ferredoxin oxidoreductase subunit alpha<br>[EC:1.2.7.3]                 | 7 |
| K00175 | 2-oxoglutarate ferredoxin oxidoreductase subunit beta<br>[EC:1.2.7.3]                  | 7 |
| K00177 | 2-oxoglutarate ferredoxin oxidoreductase subunit gamma<br>[EC:1.2.7.3]                 | 7 |
| K00239 | succinate dehydrogenase flavoprotein subunit [EC:1.3.99.1]                             | 7 |
| K00240 | succinate dehydrogenase iron-sulfur protein [EC:1.3.99.1]                              | 7 |
| K00330 | NADH dehydrogenase I subunit A [EC:1.6.5.3]                                            | 7 |
| K00338 | NADH dehydrogenase I subunit I [EC:1.6.5.3]                                            | 7 |
| K00341 | NADH dehydrogenase I subunit L [EC:1.6.5.3]                                            | 7 |
| K00347 | Na <sup>+</sup> -transporting NADH:ubiquinone oxidoreductase<br>subunit B [EC:1.6.5.-] | 7 |

*Continued on next page*

Table S2 – Continued from previous page

|        |                                                                                                       |   |
|--------|-------------------------------------------------------------------------------------------------------|---|
| K00349 | Na <sup>+</sup> -transporting NADH:ubiquinone oxidoreductase subunit D [EC:1.6.5.-]                   | 7 |
| K00350 | Na <sup>+</sup> -transporting NADH:ubiquinone oxidoreductase subunit E [EC:1.6.5.-]                   | 7 |
| K00351 | Na <sup>+</sup> -transporting NADH:ubiquinone oxidoreductase subunit F [EC:1.6.5.-]                   | 7 |
| K00666 | fatty-acyl-CoA synthase [EC:6.2.1.-]                                                                  | 7 |
| K00831 | phosphoserine aminotransferase [EC:2.6.1.52]                                                          | 7 |
| K00874 | 2-dehydro-3-deoxygluconokinase [EC:2.7.1.45]                                                          | 7 |
| K00895 | pyrophosphate--fructose-6-phosphate 1-phosphotransferase [EC:2.7.1.90]                                | 7 |
| K00927 | phosphoglycerate kinase [EC:2.7.2.3]                                                                  | 7 |
| K00962 | polyribonucleotide nucleotidyltransferase [EC:2.7.7.8]                                                | 7 |
| K01425 | glutaminase [EC:3.5.1.2]                                                                              | 7 |
| K01625 | 2-dehydro-3-deoxyphosphogluconate aldolase / 4-hydroxy-2-oxoglutarate aldolase [EC:4.1.2.14 4.1.3.16] | 7 |
| K01676 | fumarate hydratase, class I [EC:4.2.1.2]                                                              | 7 |
| K01803 | triosephosphate isomerase (TIM) [EC:5.3.1.1]                                                          | 7 |
| K01812 | glucuronate isomerase [EC:5.3.1.12]                                                                   | 7 |
| K01847 | methylmalonyl-CoA mutase [EC:5.4.99.2]                                                                | 7 |
| K01868 | threonyl-tRNA synthetase [EC:6.1.1.3]                                                                 | 7 |
| K01880 | glycyl-tRNA synthetase [EC:6.1.1.14]                                                                  | 7 |
| K02355 | elongation factor EF-G [EC:3.6.5.3]                                                                   | 7 |
| K02357 | elongation factor EF-Ts                                                                               | 7 |
| K02876 | large subunit ribosomal protein L15                                                                   | 7 |
| K02926 | large subunit ribosomal protein L4                                                                    | 7 |
| K02933 | large subunit ribosomal protein L6                                                                    | 7 |
| K02945 | small subunit ribosomal protein S1                                                                    | 7 |
| K02959 | small subunit ribosomal protein S16                                                                   | 7 |
| K02982 | small subunit ribosomal protein S3                                                                    | 7 |
| K03305 | proton-dependent oligopeptide transporter, POT family                                                 | 7 |
| K03521 | electron transfer flavoprotein beta subunit                                                           | 7 |
| K03522 | electron transfer flavoprotein alpha subunit                                                          | 7 |
| K03561 | biopolymer transport protein ExbB                                                                     | 7 |
| K06950 | uncharacterized protein                                                                               | 7 |
| K13378 | NADH dehydrogenase I subunit C/D [EC:1.6.5.3]                                                         | 7 |
| K00013 | histidinol dehydrogenase [EC:1.1.1.23]                                                                | 8 |
| K00287 | dihydrofolate reductase [EC:1.5.1.3]                                                                  | 8 |
| K00604 | methionyl-tRNA formyltransferase [EC:2.1.2.9]                                                         | 8 |
| K00791 | tRNA dimethylallyltransferase [EC:2.5.1.75]                                                           | 8 |
| K00845 | glucokinase [EC:2.7.1.2]                                                                              | 8 |
| K00942 | guanylate kinase [EC:2.7.4.8]                                                                         | 8 |
| K00951 | GTP pyrophosphokinase [EC:2.7.6.5]                                                                    | 8 |
| K01591 | orotidine-5 -phosphate decarboxylase [EC:4.1.1.23]                                                    | 8 |
| K01627 | 2-dehydro-3-deoxyphosphooctonate aldolase (KDO 8-P synthase) [EC:2.5.1.55]                            | 8 |
| K01921 | D-alanine-D-alanine ligase [EC:6.3.2.4]                                                               | 8 |
| K01929 | UDP-N-acetylmuramoylalanyl-D-glutamyl-2,6-diaminopimelate--D-alanyl-D-alanine ligase [EC:6.3.2.10]    | 8 |
| K01972 | DNA ligase (NAD <sup>+</sup> ) [EC:6.5.1.2]                                                           | 8 |
| K02493 | methyltransferase [EC:2.1.1.-]                                                                        | 8 |

Continued on next page

Table S2 – Continued from previous page

|        |                                                                                                                                            |   |
|--------|--------------------------------------------------------------------------------------------------------------------------------------------|---|
| K02503 | Hit-like protein involved in cell-cycle regulation                                                                                         | 8 |
| K02563 | UDP-N-acetylglucosamine--N-acetylmuramyl-<br>(pentapeptide) pyrophosphoryl-undecaprenol N-<br>acetylglucosamine transferase [EC:2.4.1.227] | 8 |
| K02838 | ribosome recycling factor                                                                                                                  | 8 |
| K03527 | 4-hydroxy-3-methylbut-2-enyl diphosphate reductase<br>[EC:1.17.1.2]                                                                        | 8 |
| K03555 | DNA mismatch repair protein MutS                                                                                                           | 8 |
| K03572 | DNA mismatch repair protein MutL                                                                                                           | 8 |
| K03575 | A/G-specific adenine glycosylase [EC:3.2.2.-]                                                                                              | 8 |
| K03584 | DNA repair protein RecO (recombination protein O)                                                                                          | 8 |
| K03624 | transcription elongation factor GreA                                                                                                       | 8 |
| K04068 | anaerobic ribonucleoside-triphosphate reductase activating<br>protein [EC:1.97.1.4]                                                        | 8 |
| K05366 | penicillin-binding protein 1A [EC:2.4.1.- 3.4.-.-]                                                                                         | 8 |
| K05515 | penicillin-binding protein 2                                                                                                               | 8 |
| K06215 | pyridoxine biosynthesis protein [EC:4.-.-.-]                                                                                               | 8 |
| K06949 | ribosome biogenesis GTPase [EC:3.6.1.-]                                                                                                    | 8 |
| K07058 | membrane protein                                                                                                                           | 8 |
| K10039 | putative glutamine transport system substrate-binding<br>protein                                                                           | 8 |
| K11175 | phosphoribosylglycinamide formyltransferase 1<br>[EC:2.1.2.2]                                                                              | 8 |
| K12251 | N-carbamoylputrescine amidase [EC:3.5.1.53]                                                                                                | 8 |
| K12573 | ribonuclease R [EC:3.1.-.-]                                                                                                                | 8 |
| K13038 | phosphopantothenoylecysteine decarboxylase /<br>phosphopantothenate--cysteine ligase [EC:4.1.1.36 6.3.2.5]                                 | 8 |
| K13747 | carboxynorspermidine decarboxylase [EC:4.1.1.-]                                                                                            | 8 |
| K13789 | geranylgeranyl diphosphate synthase, type II [EC:2.5.1.1<br>2.5.1.10 2.5.1.29]                                                             | 8 |
| K00040 | fructuronate reductase [EC:1.1.1.57]                                                                                                       | 9 |
| K00283 | glycine dehydrogenase subunit 2 [EC:1.4.4.2]                                                                                               | 9 |
| K00425 | cytochrome bd-I oxidase subunit I [EC:1.10.3.-]                                                                                            | 9 |
| K00677 | UDP-N-acetylglucosamine acyltransferase [EC:2.3.1.129]                                                                                     | 9 |
| K00765 | ATP phosphoribosyltransferase [EC:2.4.2.17]                                                                                                | 9 |
| K00849 | galactokinase [EC:2.7.1.6]                                                                                                                 | 9 |
| K01089 | imidazoleglycerol-phosphate dehydratase / histidinol-<br>phosphatase [EC:4.2.1.19 3.1.3.15]                                                | 9 |
| K01195 | beta-glucuronidase [EC:3.2.1.31]                                                                                                           | 9 |
| K01200 | pullulanase [EC:3.2.1.41]                                                                                                                  | 9 |
| K01284 | peptidyl-dipeptidase Dcp [EC:3.4.15.5]                                                                                                     | 9 |
| K01661 | naphthoate synthase [EC:4.1.3.36]                                                                                                          | 9 |
| K01808 | ribose 5-phosphate isomerase B [EC:5.3.1.6]                                                                                                | 9 |
| K01811 | putative family 31 glucosidase                                                                                                             | 9 |
| K01834 | phosphoglycerate mutase [EC:5.4.2.1]                                                                                                       | 9 |
| K01867 | tryptophanyl-tRNA synthetase [EC:6.1.1.2]                                                                                                  | 9 |
| K01874 | methionyl-tRNA synthetase [EC:6.1.1.10]                                                                                                    | 9 |
| K01889 | phenylalanyl-tRNA synthetase alpha chain [EC:6.1.1.20]                                                                                     | 9 |
| K02113 | F-type H <sup>+</sup> -transporting ATPase subunit delta [EC:3.6.3.14]                                                                     | 9 |
| K02548 | 1,4-dihydroxy-2-naphthoate octaprenyltransferase<br>[EC:2.5.1.74]                                                                          | 9 |

Continued on next page

*Table S2 – Continued from previous page*

|        |                                                                  |    |
|--------|------------------------------------------------------------------|----|
| K02564 | glucosamine-6-phosphate deaminase [EC:3.5.99.6]                  | 9  |
| K02879 | large subunit ribosomal protein L17                              | 9  |
| K02892 | large subunit ribosomal protein L23                              | 9  |
| K02911 | large subunit ribosomal protein L32                              | 9  |
| K02939 | large subunit ribosomal protein L9                               | 9  |
| K03088 | RNA polymerase sigma-70 factor, ECF subfamily                    | 9  |
| K03217 | preprotein translocase subunit YidC                              | 9  |
| K03588 | cell division protein FtsW                                       | 9  |
| K05349 | beta-glucosidase [EC:3.2.1.21]                                   | 9  |
| K07214 | enterochelin esterase and related enzymes                        | 9  |
| K07386 | putative endopeptidase [EC:3.4.24.-]                             | 9  |
| K07588 | LAO/AO transport system kinase [EC:2.7.-.-]                      | 9  |
| K08138 | MFS transporter, SP family, xylose:H <sup>+</sup> symportor      | 9  |
| K09013 | Fe-S cluster assembly ATP-binding protein                        | 9  |
| K00024 | malate dehydrogenase [EC:1.1.1.37]                               | 10 |
| K00036 | glucose-6-phosphate 1-dehydrogenase [EC:1.1.1.49]                | 10 |
|        | saccharopine dehydrogenase (NAD <sup>+</sup> , L-lysine forming) |    |
| K00290 | [EC:1.5.1.7]                                                     | 10 |
|        | Na <sup>+</sup> -transporting NADH:ubiquinone oxidoreductase     |    |
| K00348 | subunit C [EC:1.6.5.-]                                           | 10 |
| K00645 | [acyl-carrier-protein] S-malonyltransferase [EC:2.3.1.39]        | 10 |
| K00760 | hypoxanthine phosphoribosyltransferase [EC:2.4.2.8]              | 10 |
| K00766 | anthranilate phosphoribosyltransferase [EC:2.4.2.18]             | 10 |
|        | ATP-dependent Clp protease, protease subunit                     |    |
| K01358 | [EC:3.4.21.92]                                                   | 10 |
| K01872 | alanyl-tRNA synthetase [EC:6.1.1.7]                              | 10 |
| K01919 | glutamate--cysteine ligase [EC:6.3.2.2]                          | 10 |
|        | phosphoribosylaminoimidazole-succinocarboxamide                  |    |
| K01923 | synthase [EC:6.3.2.6]                                            | 10 |
| K02342 | DNA polymerase III subunit epsilon [EC:2.7.7.7]                  | 10 |
| K02532 | MFS transporter, OHS family, lactose permease                    | 10 |
| K02600 | N utilization substance protein A                                | 10 |
| K02796 | PTS system, mannose-specific IID component                       | 10 |
| K03148 | adenylyltransferase [EC:2.7.7.-]                                 | 10 |
| K03289 | MFS transporter, NHS family, nucleoside permease                 | 10 |
| K03293 | amino acid transporter, AAT family                               | 10 |
| K03654 | ATP-dependent DNA helicase RecQ [EC:3.6.4.12]                    | 10 |
|        | S-adenosylmethionine:tRNA ribosyltransferase-isomerase           |    |
| K07568 | [EC:5.-.-.-]                                                     | 10 |
| K08300 | ribonuclease E [EC:3.1.26.12]                                    | 10 |
| K09014 | Fe-S cluster assembly protein SufB                               | 10 |
| K09118 | hypothetical protein                                             | 10 |
| K09458 | 3-oxoacyl-[acyl-carrier-protein] synthase II [EC:2.3.1.179]      | 10 |
| K09903 | uridylate kinase [EC:2.7.4.22]                                   | 10 |
|        | acetyl-/propionyl-CoA carboxylase, biotin carboxylase,           |    |
| K11263 | biotin carboxyl carrier protein [EC:6.3.4.14]                    | 10 |
| K11533 | fatty acid synthase, bacteria type [EC:2.3.1.-]                  | 10 |
| K14623 | DNA-damage-inducible protein D                                   | 10 |
| K00864 | glycerol kinase [EC:2.7.1.30]                                    | 11 |
| K01223 | 6-phospho-beta-glucosidase [EC:3.2.1.86]                         | 11 |
| K01507 | inorganic pyrophosphatase [EC:3.6.1.1]                           | 11 |

*Continued on next page*

*Table S2 – Continued from previous page*

|        |                                                                          |    |
|--------|--------------------------------------------------------------------------|----|
| K01679 | fumarate hydratase, class II [EC:4.2.1.2]                                | 11 |
| K01712 | urocanate hydratase [EC:4.2.1.49]                                        | 11 |
| K01752 | L-serine dehydratase [EC:4.3.1.17]                                       | 11 |
| K01937 | CTP synthase [EC:6.3.4.2]                                                | 11 |
| K01963 | acetyl-CoA carboxylase carboxyl transferase subunit beta [EC:6.4.1.2]    | 11 |
| K01996 | branched-chain amino acid transport system ATP-binding protein           | 11 |
| K02010 | iron(III) transport system ATP-binding protein [EC:3.6.3.30]             | 11 |
| K02028 | polar amino acid transport system ATP-binding protein [EC:3.6.3.21]      | 11 |
| K02112 | F-type H <sup>+</sup> -transporting ATPase subunit beta [EC:3.6.3.14]    | 11 |
| K03086 | RNA polymerase primary sigma factor                                      | 11 |
| K03544 | ATP-dependent Clp protease ATP-binding subunit ClpX                      | 11 |
| K03553 | recombination protein RecA                                               | 11 |
| K03596 | GTP-binding protein LepA                                                 | 11 |
| K03628 | transcription termination factor Rho                                     | 11 |
| K03695 | ATP-dependent Clp protease ATP-binding subunit ClpB                      | 11 |
| K03798 | cell division protease FtsH [EC:3.4.24.-]                                | 11 |
| K03856 | 3-deoxy-7-phosphoheptulonate synthase [EC:2.5.1.54]                      | 11 |
| K09157 | hypothetical protein                                                     | 11 |
| K09691 | lipopolysaccharide transport system ATP-binding protein                  | 11 |
| K10008 | glutamate transport system ATP-binding protein [EC:3.6.3.-]              | 11 |
| K10112 | maltose/maltodextrin transport system ATP-binding protein                | 11 |
| K00226 | dihydroorotate oxidase [EC:1.3.3.1]                                      | 12 |
| K00928 | aspartate kinase [EC:2.7.2.4]                                            | 12 |
| K01190 | beta-galactosidase [EC:3.2.1.23]                                         | 12 |
| K01738 | cysteine synthase A [EC:2.5.1.47]                                        | 12 |
| K01770 | 2-C-methyl-D-erythritol 2,4-cyclodiphosphate synthase [EC:4.6.1.12]      | 12 |
| K01918 | pantoate--beta-alanine ligase [EC:6.3.2.1]                               | 12 |
| K02426 | cysteine desulfuration protein SufE                                      | 12 |
| K02428 | nucleoside-triphosphate pyrophosphatase [EC:3.6.1.19]                    | 12 |
| K02523 | octaprenyl diphosphate synthase [EC:2.5.1.-]                             | 12 |
| K02536 | UDP-3-O-[3-hydroxymyristoyl] glucosamine N-acyltransferase [EC:2.3.1.-]  | 12 |
| K02834 | ribosome-binding factor A                                                | 12 |
| K03545 | trigger factor                                                           | 12 |
| K03587 | cell division protein FtsI (penicillin-binding protein 3) [EC:2.4.1.129] | 12 |
| K03800 | lipoate-protein ligase A [EC:2.7.7.63]                                   | 12 |
| K03925 | MraZ protein                                                             | 12 |
| K03977 | GTP-binding protein                                                      | 12 |
| K05807 | putative lipoprotein                                                     | 12 |
| K07560 | D-tyrosyl-tRNA(Tyr) deacylase [EC:3.1.-.-]                               | 12 |
| K12340 | outer membrane channel protein TolC                                      | 12 |
| K00278 | L-aspartate oxidase [EC:1.4.3.16]                                        | 13 |
| K00324 | NAD(P) transhydrogenase subunit alpha [EC:1.6.1.2]                       | 13 |
| K00325 | NAD(P) transhydrogenase subunit beta [EC:1.6.1.2]                        | 13 |

*Continued on next page*

*Table S2 – Continued from previous page*

|        |                                                                                  |    |
|--------|----------------------------------------------------------------------------------|----|
| K00656 | formate C-acetyltransferase [EC:2.3.1.54]                                        | 13 |
| K00873 | pyruvate kinase [EC:2.7.1.40]                                                    | 13 |
| K01090 | protein phosphatase [EC:3.1.3.16]                                                | 13 |
| K01595 | phosphoenolpyruvate carboxylase [EC:4.1.1.31]                                    | 13 |
| K01607 | 4-carboxymuconolactone decarboxylase [EC:4.1.1.44]                               | 13 |
| K01784 | UDP-glucose 4-epimerase [EC:5.1.3.2]                                             | 13 |
| K01958 | pyruvate carboxylase [EC:6.4.1.1]                                                | 13 |
| K03294 | basic amino acid/polyamine antiporter, APA family                                | 13 |
| K03549 | KUP system potassium uptake protein                                              | 13 |
| K03615 | electron transport complex protein RnfC                                          | 13 |
| K07459 | putative ATP-dependent endonuclease of the OLD family                            | 13 |
| K08659 | dipeptidase [EC:3.4.-.-]                                                         | 13 |
| K11104 | melibiose permease                                                               | 13 |
| K00626 | acetyl-CoA C-acetyltransferase [EC:2.3.1.9]                                      | 14 |
| K00963 | UTP--glucose-1-phosphate uridylyltransferase [EC:2.7.7.9]                        | 14 |
| K01778 | diaminopimelate epimerase [EC:5.1.1.7]                                           | 14 |
| K01902 | succinyl-CoA synthetase alpha subunit [EC:6.2.1.5]                               | 14 |
| K02020 | molybdate transport system substrate-binding protein                             | 14 |
| K02033 | peptide/nickel transport system permease protein                                 | 14 |
| K02189 | cobalamin biosynthesis protein CbiG                                              | 14 |
| K02232 | adenosylcobyrinic acid synthase [EC:6.3.5.10]                                    | 14 |
| K03072 | preprotein translocase subunit SecD                                              | 14 |
| K03147 | thiamine biosynthesis protein ThiC                                               | 14 |
| K03639 | molybdenum cofactor biosynthesis protein                                         | 14 |
| K03699 | putative hemolysin                                                               | 14 |
| K05934 | precorrin-3B C17-methyltransferase [EC:2.1.1.131]                                | 14 |
| K00854 | xylulokinase [EC:2.7.1.17]                                                       | 15 |
| K02518 | translation initiation factor IF-1                                               | 15 |
| K02887 | large subunit ribosomal protein L20                                              | 15 |
| K02888 | large subunit ribosomal protein L21                                              | 15 |
| K02909 | large subunit ribosomal protein L31                                              | 15 |
| K02913 | large subunit ribosomal protein L33                                              | 15 |
| K02968 | small subunit ribosomal protein S20                                              | 15 |
| K03502 | DNA polymerase V                                                                 | 15 |
| K03517 | quinolinate synthase [EC:2.5.1.72]                                               | 15 |
| K03530 | DNA-binding protein HU-beta                                                      | 15 |
| K03617 | electron transport complex protein RnfA                                          | 15 |
| K03719 | Lrp/AsnC family transcriptional regulator, leucine-responsive regulatory protein | 15 |
| K03803 | sigma-E factor negative regulatory protein RseC                                  | 15 |
| K05808 | putative sigma-54 modulation protein                                             | 15 |
| K00346 | Na+-transporting NADH:ubiquinone oxidoreductase subunit A [EC:1.6.5.-]           | 16 |
| K00812 | aspartate aminotransferase [EC:2.6.1.1]                                          | 16 |
| K01624 | fructose-bisphosphate aldolase, class II [EC:4.1.2.13]                           | 16 |
| K01840 | phosphomannomutase [EC:5.4.2.8]                                                  | 16 |
| K03595 | GTP-binding protein Era                                                          | 16 |
| K06142 | outer membrane protein                                                           | 16 |
| K06178 | ribosomal large subunit pseudouridine synthase B [EC:5.4.99.12]                  | 16 |
| K07792 | anaerobic C4-dicarboxylate transporter DcuB                                      | 16 |

*Continued on next page*

*Table S2 – Continued from previous page*

|        |                                                                    |    |
|--------|--------------------------------------------------------------------|----|
|        | bifunctional aspartokinase / homoserine dehydrogenase 1            |    |
| K12524 | [EC:2.7.2.4 1.1.1.3]                                               | 16 |
| K13043 | N-succinyl-L-ornithine transcarbamylase [EC:2.1.3.11]              | 16 |
| K00074 | 3-hydroxybutyryl-CoA dehydrogenase [EC:1.1.1.157]                  | 17 |
| K00789 | S-adenosylmethionine synthetase [EC:2.5.1.6]                       | 17 |
|        | two-component system, chemotaxis family, response                  |    |
| K03413 | regulator CheY                                                     | 17 |
| K03667 | ATP-dependent HslUV protease ATP-binding subunit HslU              | 17 |
| K03701 | excinuclease ABC subunit A                                         | 17 |
| K06020 | sulfate-transporting ATPase [EC:3.6.3.25]                          | 17 |
|        | phosphate starvation-inducible protein PhoH and related            |    |
| K06217 | proteins                                                           | 17 |
|        | general L-amino acid transport system ATP-binding protein          |    |
| K09972 | [EC:3.6.3.-]                                                       | 17 |
|        | putative glutamine transport system ATP-binding protein            |    |
| K10041 | [EC:3.6.3.-]                                                       | 17 |
| K14226 | tRNA His                                                           | 17 |
| K00721 | dolichol-phosphate mannosyltransferase [EC:2.4.1.83]               | 18 |
| K00748 | lipid-A-disaccharide synthase [EC:2.4.1.182]                       | 18 |
| K01585 | arginine decarboxylase [EC:4.1.1.19]                               | 18 |
| K03978 | GTP-binding protein                                                | 18 |
| K04564 | superoxide dismutase, Fe-Mn family [EC:1.15.1.1]                   | 18 |
| K04773 | protease IV [EC:3.4.21.-]                                          | 18 |
|        | lipopolysaccharide export system ATP-binding protein               |    |
| K06861 | [EC:3.6.3.-]                                                       | 18 |
|        | D-alanyl-D-alanine carboxypeptidase / D-alanyl-D-alanine-          |    |
|        | endopeptidase (penicillin-binding protein 4) [EC:3.4.16.4          |    |
| K07259 | 3.4.99.-]                                                          | 18 |
|        | sigma-B regulation protein RsbU (phosphoserine                     |    |
| K07315 | phosphatase)                                                       | 18 |
|        | membrane-bound lytic murein transglycosylase D                     |    |
| K08307 | [EC:3.2.1.-]                                                       | 18 |
| K00033 | 6-phosphogluconate dehydrogenase [EC:1.1.1.44]                     | 19 |
| K00091 | dihydroflavonol-4-reductase [EC:1.1.1.219]                         | 19 |
| K00527 | ribonucleoside-triphosphate reductase [EC:1.17.4.2]                | 19 |
| K00639 | glycine C-acetyltransferase [EC:2.3.1.29]                          | 19 |
| K00657 | diamine N-acetyltransferase [EC:2.3.1.57]                          | 19 |
|        | putative spermidine/putrescine transport system ATP-               |    |
| K02052 | binding protein                                                    | 19 |
|        | simple sugar transport system ATP-binding protein                  |    |
| K02056 | [EC:3.6.3.17]                                                      | 19 |
| K02117 | V-type H <sup>+</sup> -transporting ATPase subunit A [EC:3.6.3.14] | 19 |
|        | peptidyl-prolyl cis-trans isomerase A (cyclophilin A)              |    |
| K03767 | [EC:5.2.1.8]                                                       | 19 |
|        | putative multiple sugar transport system ATP-binding               |    |
| K10548 | protein                                                            | 19 |
| K00031 | isocitrate dehydrogenase [EC:1.1.1.42]                             | 20 |
| K00528 | ferredoxin--NADP <sup>+</sup> reductase [EC:1.18.1.2]              | 20 |
| K00611 | ornithine carbamoyltransferase [EC:2.1.3.3]                        | 20 |
| K00948 | ribose-phosphate pyrophosphokinase [EC:2.7.6.1]                    | 20 |
| K02032 | peptide/nickel transport system ATP-binding protein                | 20 |
| K02034 | peptide/nickel transport system permease protein                   | 20 |

*Continued on next page*

Table S2 – Continued from previous page

|        |                                                                                                                        |    |
|--------|------------------------------------------------------------------------------------------------------------------------|----|
| K02825 | pyrimidine operon attenuation protein / uracil<br>phosphoribosyltransferase [EC:2.4.2.9]                               | 20 |
| K04072 | acetaldehyde dehydrogenase / alcohol dehydrogenase<br>[EC:1.2.1.10 1.1.1.1]                                            | 20 |
| K06959 | uncharacterized protein                                                                                                | 20 |
| K09812 | cell division transport system ATP-binding protein<br>ribonucleoside-diphosphate reductase beta chain<br>[EC:1.17.4.1] | 20 |
| K00526 | acetate kinase [EC:2.7.2.1]                                                                                            | 21 |
| K01577 | oxalyl-CoA decarboxylase [EC:4.1.1.8]                                                                                  | 21 |
| K01632 | fructose-6-phosphate phosphoketolase [EC:4.1.2.22]                                                                     | 21 |
| K01835 | phosphoglucomutase [EC:5.4.2.2]                                                                                        | 21 |
| K01885 | glutamyl-tRNA synthetase [EC:6.1.1.17]                                                                                 | 21 |
| K03585 | membrane fusion protein                                                                                                | 21 |
| K07749 | formyl-CoA transferase [EC:2.8.3.16]                                                                                   | 21 |
| K10005 | glutamate transport system substrate-binding protein                                                                   | 21 |
| K10007 | glutamate transport system permease protein<br>indolepyruvate ferredoxin oxidoreductase, alpha subunit<br>[EC:1.2.7.8] | 21 |
| K00179 | protoporphyrinogen oxidase [EC:1.3.3.4]                                                                                | 22 |
| K00231 | dihydrolipoamide dehydrogenase [EC:1.8.1.4]                                                                            | 22 |
| K00382 | phosphate butyryltransferase [EC:2.3.1.19]                                                                             | 22 |
| K00634 | alpha-glucuronidase [EC:3.2.1.139]                                                                                     | 22 |
| K01235 | threonine synthase [EC:4.2.3.1]                                                                                        | 22 |
| K01733 | sulfonate/nitrate/taurine transport system substrate-binding<br>protein                                                | 22 |
| K02051 | GAF domain-containing protein                                                                                          | 22 |
| K07170 | hypothetical protein                                                                                                   | 22 |
| K09797 | hypothetical protein                                                                                                   | 22 |
| K09955 | hypothetical protein                                                                                                   | 22 |
| K01428 | urease subunit alpha [EC:3.5.1.5]                                                                                      | 23 |
| K01999 | branched-chain amino acid transport system substrate-<br>binding protein                                               | 23 |
| K02282 | pilus assembly protein CpaE                                                                                            | 23 |
| K03168 | DNA topoisomerase I [EC:5.99.1.2]                                                                                      | 23 |
| K03758 | arginine:ornithine antiporter                                                                                          | 23 |
| K03892 | ArsR family transcriptional regulator                                                                                  | 23 |
| K07481 | transposase, IS5 family                                                                                                | 23 |
| K07483 | transposase                                                                                                            | 23 |
| K12510 | tight adherence protein B                                                                                              | 23 |
| K00342 | NADH dehydrogenase I subunit M [EC:1.6.5.3]                                                                            | 24 |
| K00946 | thiamine-monophosphate kinase [EC:2.7.4.16]                                                                            | 24 |
| K01883 | cysteinyl-tRNA synthetase [EC:6.1.1.16]                                                                                | 24 |
| K02621 | topoisomerase IV subunit A [EC:5.99.1.-]                                                                               | 24 |
| K03281 | chloride channel protein, CIC family                                                                                   | 24 |
| K03590 | cell division protein FtsA                                                                                             | 24 |
| K07277 | outer membrane protein<br>phosphoribosylglycinamide formyltransferase 2<br>[EC:2.1.2.2]                                | 24 |
| K08289 | 3-isopropylmalate dehydrogenase [EC:1.1.1.85]                                                                          | 25 |
| K00052 | 3-phosphoshikimate 1-carboxyvinyltransferase<br>[EC:2.5.1.19]                                                          | 25 |

Continued on next page

Table S2 – Continued from previous page

|        |                                                                                       |    |
|--------|---------------------------------------------------------------------------------------|----|
| K00820 | glucosamine--fructose-6-phosphate aminotransferase (isomerizing) [EC:2.6.1.16]        | 25 |
| K01338 | ATP-dependent Lon protease [EC:3.4.21.53]                                             | 25 |
| K01653 | acetolactate synthase I/III small subunit [EC:2.2.1.6]                                | 25 |
| K01703 | 3-isopropylmalate/(R)-2-methylmalate dehydratase large subunit [EC:4.2.1.33 4.2.1.35] | 25 |
| K01714 | dihydrodipicolinate synthase [EC:4.2.1.52]                                            | 25 |
| K01756 | adenylosuccinate lyase [EC:4.3.2.2]                                                   | 25 |
| K02283 | pilus assembly protein CpaF                                                           | 25 |
| K00578 | tetrahydromethanopterin S-methyltransferase subunit B [EC:2.1.1.86]                   | 26 |
| K00978 | glucose-1-phosphate cytidylyltransferase [EC:2.7.7.33]                                | 26 |
| K03330 | glutamyl-tRNA(Gln) amidotransferase subunit E [EC:6.3.5.7]                            | 26 |
| K07491 | putative transposase                                                                  | 26 |
| K11646 | dehydroquinase synthase II [EC:1.4.1.-]                                               | 26 |
| K14081 | methanol corrinoid protein                                                            | 26 |
| K14218 | tRNA Ala                                                                              | 26 |
| K14227 | tRNA Ile                                                                              | 26 |
| K14235 | tRNA Trp                                                                              | 26 |
| K00609 | aspartate carbamoyltransferase catalytic subunit [EC:2.1.3.2]                         | 27 |
| K01448 | N-acetylmuramoyl-L-alanine amidase [EC:3.5.1.28]                                      | 27 |
| K02108 | F-type H <sup>+</sup> -transporting ATPase subunit a [EC:3.6.3.14]                    | 27 |
| K02188 | cobalamin biosynthesis protein CbiD                                                   | 27 |
| K03499 | trk system potassium uptake protein TrkA                                              | 27 |
| K07173 | S-ribosylhomocysteine lyase [EC:4.4.1.21]                                             | 27 |
| K07727 | putative transcriptional regulator                                                    | 27 |
| K02110 | F-type H <sup>+</sup> -transporting ATPase subunit c [EC:3.6.3.14]                    | 28 |
| K02190 | sirohydrochlorin cobaltochelate [EC:4.99.1.3]                                         | 28 |
| K02348 | ElaA protein                                                                          | 28 |
| K02884 | large subunit ribosomal protein L19                                                   | 28 |
| K02899 | large subunit ribosomal protein L27                                                   | 28 |
| K02914 | large subunit ribosomal protein L34                                                   | 28 |
| K02954 | small subunit ribosomal protein S14                                                   | 28 |
| K05516 | curved DNA-binding protein                                                            | 28 |
| K01188 | beta-glucosidase [EC:3.2.1.21]                                                        | 29 |
| K01259 | proline iminopeptidase [EC:3.4.11.5]                                                  | 29 |
| K01804 | L-arabinose isomerase [EC:5.3.1.4]                                                    | 29 |
| K01870 | isoleucyl-tRNA synthetase [EC:6.1.1.5]                                                | 29 |
| K03106 | signal recognition particle subunit SRP54                                             | 29 |
| K03307 | solute:Na <sup>+</sup> symporter, SSS family                                          | 29 |
| K03503 | DNA polymerase V [EC:3.4.21.-]                                                        | 29 |
| K08191 | MFS transporter, ACS family, hexuronate transporter                                   | 29 |
| K00931 | glutamate 5-kinase [EC:2.7.2.11]                                                      | 30 |
| K01209 | alpha-N-arabinofuranosidase [EC:3.2.1.55]                                             | 30 |
| K01875 | seryl-tRNA synthetase [EC:6.1.1.11]                                                   | 30 |
| K01887 | arginyl-tRNA synthetase [EC:6.1.1.19]                                                 | 30 |
| K02314 | replicative DNA helicase [EC:3.6.4.12]                                                | 30 |
| K02528 | 16S rRNA (adenine1518-N6/adenine1519-N6)-dimethyltransferase [EC:2.1.1.182]           | 30 |

Continued on next page

Table S2 – Continued from previous page

|        |                                                                        |    |
|--------|------------------------------------------------------------------------|----|
| K02837 | peptide chain release factor RF-3                                      | 30 |
|        | (E)-4-hydroxy-3-methylbut-2-enyl-diphosphate synthase                  |    |
| K03526 | [EC:1.17.7.1]                                                          | 30 |
| K00241 | succinate dehydrogenase cytochrome b-556 subunit                       | 31 |
| K02863 | large subunit ribosomal protein L1                                     | 31 |
| K02867 | large subunit ribosomal protein L11                                    | 31 |
| K02906 | large subunit ribosomal protein L3                                     | 31 |
| K02931 | large subunit ribosomal protein L5                                     | 31 |
| K02961 | small subunit ribosomal protein S17                                    | 31 |
| K13993 | HSP20 family protein                                                   | 31 |
| K14222 | tRNA Cys                                                               | 31 |
| K00335 | NADH dehydrogenase I subunit F [EC:1.6.5.3]                            | 32 |
| K00973 | glucose-1-phosphate thymidyltransferase [EC:2.7.7.24]                  | 32 |
| K01251 | adenosylhomocysteinase [EC:3.3.1.1]                                    | 32 |
| K01596 | phosphoenolpyruvate carboxykinase (GTP) [EC:4.1.1.32]                  | 32 |
| K01696 | tryptophan synthase beta chain [EC:4.2.1.20]                           | 32 |
|        | 3-isopropylmalate/(R)-2-methylmalate dehydratase small                 |    |
| K01704 | subunit [EC:4.2.1.33 4.2.1.35]                                         | 32 |
| K02031 | peptide/nickel transport system ATP-binding protein                    | 32 |
|        | sulfonate/nitrate/taurine transport system ATP-binding                 |    |
| K02049 | protein                                                                | 32 |
| K02864 | large subunit ribosomal protein L10                                    | 33 |
| K02871 | large subunit ribosomal protein L13                                    | 33 |
| K02890 | large subunit ribosomal protein L22                                    | 33 |
| K02895 | large subunit ribosomal protein L24                                    | 33 |
| K02956 | small subunit ribosomal protein S15                                    | 33 |
| K02992 | small subunit ribosomal protein S7                                     | 33 |
| K02996 | small subunit ribosomal protein S9                                     | 33 |
| K01433 | formyltetrahydrofolate deformylase [EC:3.5.1.10]                       | 34 |
| K01960 | pyruvate carboxylase subunit B [EC:6.4.1.1]                            | 34 |
| K03303 | lactate transporter, LctP family                                       | 34 |
| K03832 | periplasmic protein TonB                                               | 34 |
| K05801 | DnaJ like chaperone protein                                            | 34 |
| K09011 | D-citramalate synthase [EC:2.3.1.182]                                  | 34 |
| K11749 | regulator of sigma E protease [EC:3.4.24.-]                            | 34 |
| K00059 | 3-oxoacyl-[acyl-carrier protein] reductase [EC:1.1.1.100]              | 35 |
|        | glutamate synthase (NADPH/NADH) large chain                            |    |
| K00265 | [EC:1.4.1.13 1.4.1.14]                                                 | 35 |
|        | glutamate synthase (NADPH/NADH) small chain                            |    |
| K00266 | [EC:1.4.1.13 1.4.1.14]                                                 | 35 |
| K00615 | transketolase [EC:2.2.1.1]                                             | 35 |
| K01952 | phosphoribosylformylglycinamide synthase [EC:6.3.5.3]                  | 35 |
| K04567 | lysyl-tRNA synthetase, class II [EC:6.1.1.6]                           | 35 |
|        | LysR family transcriptional regulator, hydrogen peroxide-              |    |
| K04761 | inducible genes activator                                              | 35 |
| K01006 | pyruvate,orthophosphate dikinase [EC:2.7.9.1]                          | 36 |
| K01610 | phosphoenolpyruvate carboxykinase (ATP) [EC:4.1.1.49]                  | 36 |
| K01629 | rhamnulose-1-phosphate aldolase [EC:4.1.2.19]                          | 36 |
| K02111 | F-type H <sup>+</sup> -transporting ATPase subunit alpha [EC:3.6.3.14] | 36 |
| K03737 | putative pyruvate-flavodoxin oxidoreductase [EC:1.2.7.-]               | 36 |
| K04043 | molecular chaperone DnaK                                               | 36 |

Continued on next page

*Table S2 – Continued from previous page*

|        |                                                           |    |
|--------|-----------------------------------------------------------|----|
| K02520 | translation initiation factor IF-3                        | 37 |
| K02527 | 3-deoxy-D-manno-octulosonic-acid transferase [EC:2.-.-.]  | 37 |
| K02622 | topoisomerase IV subunit B [EC:5.99.1.-]                  | 37 |
| K04518 | prephenate dehydratase [EC:4.2.1.51]                      | 37 |
| K07148 | uncharacterized protein                                   | 37 |
| K00058 | D-3-phosphoglycerate dehydrogenase [EC:1.1.1.95]          | 38 |
| K00262 | glutamate dehydrogenase (NADP+) [EC:1.4.1.4]              | 38 |
| K00600 | glycine hydroxymethyltransferase [EC:2.1.2.1]             | 38 |
| K01895 | acetyl-CoA synthetase [EC:6.2.1.1]                        | 38 |
| K01912 | phenylacetate-CoA ligase [EC:6.2.1.30]                    | 38 |
| K03569 | rod shape-determining protein MreB and related proteins   | 38 |
| K01586 | diaminopimelate decarboxylase [EC:4.1.1.20]               | 39 |
| K01749 | hydroxymethylbilane synthase [EC:2.5.1.61]                | 39 |
| K02035 | peptide/nickel transport system substrate-binding protein | 39 |
| K02500 | cyclase [EC:4.1.3.-]                                      | 39 |
| K03177 | tRNA pseudouridine synthase B [EC:5.4.99.12]              | 39 |
| K07025 | putative hydrolase of the HAD superfamily                 | 39 |
| K01940 | argininosuccinate synthase [EC:6.3.4.5]                   | 40 |
| K02874 | large subunit ribosomal protein L14                       | 40 |
| K02907 | large subunit ribosomal protein L30                       | 40 |
| K02967 | small subunit ribosomal protein S2                        | 40 |
| K02986 | small subunit ribosomal protein S4                        | 40 |
| K02988 | small subunit ribosomal protein S5                        | 40 |
| K02027 | multiple sugar transport system substrate-binding protein | 41 |
| K02039 | phosphate transport system protein                        | 41 |
|        | aspartyl-tRNA(Asn)/glutamyl-tRNA (Gln)                    |    |
| K02433 | amidotransferase subunit A [EC:6.3.5.6 6.3.5.7]           | 41 |
|        | two-component system, chemotaxis family, sensor kinase    |    |
| K03407 | CheA [EC:2.7.13.3]                                        | 41 |
|        | ATP-dependent helicase Lhr and Lhr-like helicase          |    |
| K03724 | [EC:3.6.4.-]                                              | 41 |
| K04759 | ferrous iron transport protein B                          | 41 |
| K01212 | levanase [EC:3.2.1.65]                                    | 42 |
| K02601 | transcriptional antiterminator NusG                       | 42 |
| K02614 | phenylacetic acid degradation protein                     | 42 |
| K05993 | isochorismatase [EC:3.3.2.1]                              | 42 |
| K00705 | 4-alpha-glucanotransferase [EC:2.4.1.25]                  | 43 |
|        | methylenetetrahydrofolate dehydrogenase (NADP+) /         |    |
|        | methenyltetrahydrofolate cyclohydrolase [EC:1.5.1.5       |    |
| K01491 | 3.5.4.9]                                                  | 43 |
| K01649 | 2-isopropylmalate synthase [EC:2.3.3.13]                  | 43 |
| K02316 | DNA primase [EC:2.7.7.-]                                  | 43 |
| K03927 | carboxylesterase type B [EC:3.1.1.1]                      | 43 |
|        | nicotinate-nucleotide--dimethylbenzimidazole              |    |
| K00768 | phosphoribosyltransferase [EC:2.4.2.21]                   | 44 |
| K03427 | type I restriction enzyme M protein [EC:2.1.1.72]         | 44 |
| K07496 | putative transposase                                      | 44 |
|        | ATP-binding cassette, subfamily B, bacterial MsbA         |    |
| K11085 | [EC:3.6.3.-]                                              | 44 |
| K14237 | tRNA Val                                                  | 44 |
| K08217 | MFS transporter, DHA3 family, macrolide efflux protein    | 45 |

*Continued on next page*

Table S2 – Continued from previous page

|        |                                                          |    |
|--------|----------------------------------------------------------|----|
| K14223 | tRNA Gln                                                 | 45 |
| K14228 | tRNA Leu                                                 | 45 |
| K14233 | tRNA Ser                                                 | 45 |
| K14234 | tRNA Thr                                                 | 45 |
| K00761 | uracil phosphoribosyltransferase [EC:2.4.2.9]            | 46 |
|        | 5-(carboxyamino)imidazole ribonucleotide mutase          |    |
| K01588 | [EC:5.4.99.18]                                           | 46 |
| K03306 | inorganic phosphate transporter, PiT family              | 46 |
|        | bifunctional UDP-N-acetylglucosamine pyrophosphorylase   |    |
|        | / Glucosamine-1-phosphate N-acetyltransferase            |    |
| K04042 | [EC:2.7.7.23 2.3.1.157]                                  | 46 |
| K14219 | tRNA Arg                                                 | 46 |
| K00912 | tetraacyldisaccharide 4 -kinase [EC:2.7.1.130]           | 47 |
| K01265 | methionyl aminopeptidase [EC:3.4.11.18]                  | 47 |
| K01775 | alanine racemase [EC:5.1.1.1]                            | 47 |
| K08301 | ribonuclease G [EC:3.1.26.-]                             | 47 |
| K09015 | Fe-S cluster assembly protein SufD                       | 47 |
| K00625 | phosphate acetyltransferase [EC:2.3.1.8]                 | 48 |
| K01686 | mannonate dehydratase [EC:4.2.1.8]                       | 48 |
| K01881 | prolyl-tRNA synthetase [EC:6.1.1.15]                     | 48 |
| K02469 | DNA gyrase subunit A [EC:5.99.1.3]                       | 48 |
| K02519 | translation initiation factor IF-2                       | 48 |
| K00847 | fructokinase [EC:2.7.1.4]                                | 49 |
|        | 2-C-methyl-D-erythritol 4-phosphate cytidyltransferase   |    |
| K00991 | [EC:2.7.7.60]                                            | 49 |
| K01262 | Xaa-Pro aminopeptidase [EC:3.4.11.9]                     | 49 |
| K01939 | adenylosuccinate synthase [EC:6.3.4.4]                   | 49 |
| K03614 | electron transport complex protein RnfD                  | 49 |
| K00053 | ketol-acid reductoisomerase [EC:1.1.1.86]                | 50 |
| K00133 | aspartate-semialdehyde dehydrogenase [EC:1.2.1.11]       | 50 |
| K00560 | thymidylate synthase [EC:2.1.1.45]                       | 50 |
| K00826 | branched-chain amino acid aminotransferase [EC:2.6.1.42] | 50 |
| K01869 | leucyl-tRNA synthetase [EC:6.1.1.4]                      | 50 |
| K01715 | 3-hydroxybutyryl-CoA dehydratase [EC:4.2.1.55]           | 51 |
| K01755 | argininosuccinate lyase [EC:4.3.2.1]                     | 51 |
| K03074 | preprotein translocase subunit SecF                      | 51 |
| K03823 | phosphinothricin acetyltransferase [EC:2.3.1.183]        | 51 |
|        | N-acetyl-gamma-glutamyl-phosphate/N-acetyl-gamma-        |    |
| K00145 | aminoadipyl-phosphate reductase [EC:1.2.1.38 1.2.1.-]    | 52 |
| K00764 | amidophosphoribosyltransferase [EC:2.4.2.14]             | 52 |
| K00865 | glycerate kinase [EC:2.7.1.31]                           | 52 |
| K01740 | O-acetylhomoserine (thiol)-lyase [EC:2.5.1.49]           | 52 |
| K00700 | 1,4-alpha-glucan branching enzyme [EC:2.4.1.18]          | 53 |
| K01991 | polysaccharide export outer membrane protein             | 53 |
| K03547 | exonuclease SbcD                                         | 53 |
| K03783 | purine-nucleoside phosphorylase [EC:2.4.2.1]             | 53 |
| K01270 | aminoacylhistidine dipeptidase [EC:3.4.13.3]             | 54 |
| K03040 | DNA-directed RNA polymerase subunit alpha [EC:2.7.7.6]   | 54 |
| K01890 | phenylalanyl-tRNA synthetase beta chain [EC:6.1.1.20]    | 55 |
| K01892 | histidyl-tRNA synthetase [EC:6.1.1.21]                   | 55 |
| K03797 | carboxyl-terminal processing protease [EC:3.4.21.102]    | 55 |

Continued on next page

*Table S2 – Continued from previous page*

|        |                                                       |    |
|--------|-------------------------------------------------------|----|
| K04079 | molecular chaperone HtpG                              | 55 |
| K02078 | acyl carrier protein                                  | 56 |
| K02902 | large subunit ribosomal protein L28                   | 56 |
| K02946 | small subunit ribosomal protein S10                   | 56 |
| K02990 | small subunit ribosomal protein S6                    | 56 |
| K01783 | ribulose-phosphate 3-epimerase [EC:5.1.3.1]           | 57 |
|        | UDP-N-acetylmuramoylalanine--D-glutamate ligase       |    |
| K01925 | [EC:6.3.2.9]                                          | 57 |
| K02356 | elongation factor EF-P                                | 57 |
| K03284 | metal ion transporter, MIT family                     | 57 |
| K02775 | PTS system, galactitol-specific IIC component         | 58 |
| K03076 | preprotein translocase subunit SecY                   | 58 |
| K04078 | chaperonin GroES                                      | 58 |
| K07405 | alpha-amylase [EC:3.2.1.1]                            | 58 |
| K00088 | IMP dehydrogenase [EC:1.1.1.205]                      | 59 |
| K01938 | formate--tetrahydrofolate ligase [EC:6.3.4.3]         | 59 |
| K03702 | excinuclease ABC subunit B                            | 59 |
| K13892 | glutathione transport system ATP-binding protein      | 59 |
| K02358 | elongation factor EF-Tu [EC:3.6.5.3]                  | 60 |
| K03043 | DNA-directed RNA polymerase subunit beta [EC:2.7.7.6] | 60 |
| K03046 | DNA-directed RNA polymerase subunit beta [EC:2.7.7.6] | 60 |
|        | 4-hydroxythreonine-4-phosphate dehydrogenase          |    |
| K00097 | [EC:1.1.1.262]                                        | 61 |
|        | monofunctional biosynthetic peptidoglycan             |    |
| K03814 | transglycosylase [EC:2.4.1.-]                         | 61 |
| K00215 | dihydrodipicolinate reductase [EC:1.3.1.26]           | 62 |
| K00432 | glutathione peroxidase [EC:1.11.1.9]                  | 62 |
| K00939 | adenylate kinase [EC:2.7.4.3]                         | 62 |
| K01620 | threonine aldolase [EC:4.1.2.5]                       | 63 |
| K02337 | DNA polymerase III subunit alpha [EC:2.7.7.7]         | 63 |
| K03100 | signal peptidase I [EC:3.4.21.89]                     | 63 |
|        | glycerol-3-phosphate dehydrogenase (NAD(P)+)          |    |
| K00057 | [EC:1.1.1.94]                                         | 64 |
| K03340 | diaminopimelate dehydrogenase [EC:1.4.1.16]           | 64 |
| K09760 | DNA recombination protein RmuC                        | 64 |
| K01609 | indole-3-glycerol phosphate synthase [EC:4.1.1.48]    | 65 |
| K01678 | fumarate hydratase subunit beta [EC:4.2.1.2]          | 65 |
| K01903 | succinyl-CoA synthetase beta subunit [EC:6.2.1.5]     | 65 |
| K01786 | L-ribulose-5-phosphate 4-epimerase [EC:5.1.3.4]       | 66 |
| K02970 | small subunit ribosomal protein S21                   | 66 |
| K09748 | hypothetical protein                                  | 66 |
|        | 4-deoxy-L-threo-5-hexosulose-uronate ketol-isomerase  |    |
| K01815 | [EC:5.3.1.17]                                         | 67 |
| K01858 | myo-inositol-1-phosphate synthase [EC:5.5.1.4]        | 67 |
| K01677 | fumarate hydratase subunit alpha [EC:4.2.1.2]         | 68 |
| K05936 | precorrin-4 C11-methyltransferase [EC:2.1.1.133]      | 68 |
| K00945 | cytidylate kinase [EC:2.7.4.14]                       | 69 |
| K03110 | fused signal recognition particle receptor            | 69 |
| K00041 | tagaturonate reductase [EC:1.1.1.58]                  | 70 |
| K12257 | SecD/SecE fusion protein                              | 70 |
| K00929 | butyrate kinase [EC:2.7.2.7]                          | 71 |

*Continued on next page*

*Table S2 – Continued from previous page*

|        |                                                        |    |
|--------|--------------------------------------------------------|----|
| K06199 | CrcB protein                                           | 71 |
| K00339 | NADH dehydrogenase I subunit J [EC:1.6.5.3]            | 72 |
| K00605 | aminomethyltransferase [EC:2.1.2.10]                   | 72 |
|        | indolepyruvate ferredoxin oxidoreductase, beta subunit |    |
| K00180 | [EC:1.2.7.8]                                           | 73 |
| K01710 | dTDP-glucose 4,6-dehydratase [EC:4.2.1.46]             | 73 |
| K00340 | NADH dehydrogenase I subunit K [EC:1.6.5.3]            | 74 |
| K02881 | large subunit ribosomal protein L18                    | 74 |
| K00651 | homoserine O-succinyltransferase [EC:2.3.1.46]         | 75 |

6
