# Supplementary material
Source: publisher figshare collection journal article supplement (https://plos.figshare.com/articles/dataset/_/2585503)
Supplement: Supplementary file 1 [file 1 › S3 Table.pdf]

1 **Table S3. Microbial genes associated with methane emissions.** Partial least squares (PLS) estimates of effects of microbial genes characterised by the  
2 Kyoto Encyclopedia of Genes and Genomes (KEGG) database in an analysis where the PLS factors explained 97.0 % of the variation in model effects and  
3 81.7 % of the variation in methane emissions (g/kg dry matter intake).

| KEGG ID, diet | Description                                                                    | Estimate | VIP   | P-value | R <sup>2</sup> |
|---------------|--------------------------------------------------------------------------------|----------|-------|---------|----------------|
| Diet CON      | concentrate based diet                                                         | -0.19980 | 1.314 | 0.001   | 0.459          |
| Diet FOR      | forage based diet                                                              | 0.19980  | 1.314 | 0.001   | 0.459          |
| K00584        | tetrahydromethanopterin S-methyltransferase subunit H [EC:2.1.1.86]            | 0.07480  | 1.044 | 0.020   | 0.833          |
| K00200        | formylmethanofuran dehydrogenase subunit A [EC:1.2.99.5]                       | 0.05914  | 0.998 | 0.038   | 0.789          |
| K00205        | formylmethanofuran dehydrogenase subunit F [EC:1.2.99.5]                       | 0.05092  | 0.992 | 0.062   | 0.747          |
| K00672        | formylmethanofuran--tetrahydromethanopterin N-formyltransferase [EC:2.3.1.101] | 0.04563  | 0.988 | 0.046   | 0.773          |
| K00203        | formylmethanofuran dehydrogenase subunit D [EC:1.2.99.5]                       | 0.04299  | 0.985 | 0.025   | 0.819          |
| K00169        | pyruvate ferredoxin oxidoreductase, alpha subunit [EC:1.2.7.1]                 | 0.03657  | 0.982 | 0.032   | 0.802          |
| K00201        | formylmethanofuran dehydrogenase subunit B [EC:1.2.99.5]                       | 0.05767  | 0.973 | 0.013   | 0.859          |
| K13812        | bifunctional enzyme Fae/Hps [EC:4.3.-.- 4.1.2.43]                              | 0.02893  | 0.965 | 0.051   | 0.765          |
| K00580        | tetrahydromethanopterin S-methyltransferase subunit D [EC:2.1.1.86]            | 0.04906  | 0.961 | 0.071   | 0.735          |
| K00170        | pyruvate ferredoxin oxidoreductase, beta subunit [EC:1.2.7.1]                  | 0.02785  | 0.957 | 0.070   | 0.737          |
| K00577        | tetrahydromethanopterin S-methyltransferase subunit A [EC:2.1.1.86]            | 0.01639  | 0.957 | 0.063   | 0.747          |
| K00400        | methyl coenzyme M reductase system, component A2                               | 0.01240  | 0.951 | 0.063   | 0.747          |
| K14128        | F420-non-reducing hydrogenase subunit G [EC:1.12.99.-]                         | 0.03552  | 0.948 | 0.013   | 0.861          |
| K00441        | coenzyme F420 hydrogenase beta subunit [EC:1.12.98.1]                          | -0.00658 | 0.947 | 0.086   | 0.717          |
| K14123        | energy-converting hydrogenase B subunit N                                      | 0.00742  | 0.940 | 0.089   | 0.714          |
| K00399        | methyl-coenzyme M reductase alpha subunit [EC:2.8.4.1]                         | 0.04127  | 0.937 | 0.010   | 0.872          |
| K01499        | methenyltetrahydromethanopterin cyclohydrolase [EC:3.5.4.27]                   | 0.02985  | 0.934 | 0.038   | 0.790          |
| K00123        | formate dehydrogenase, alpha subunit [EC:1.2.1.2]                              | 0.02813  | 0.931 | 0.013   | 0.857          |
| K00581        | tetrahydromethanopterin S-methyltransferase subunit E [EC:2.1.1.86]            | 0.02232  | 0.931 | 0.017   | 0.844          |
| K00125        | formate dehydrogenase, beta subunit [EC:1.2.1.2]                               | 0.00544  | 0.929 | 0.030   | 0.808          |

4 Two factors were significant in the partial least squares analysis. Without considering diet effects in the model, the microbial genes explained 97.1 % of the variation of  
5 model effects and 77.1 % of the variation in methane emissions. The PLS estimates were based on predictors and responses centered and scaled to have mean 0 and standard  
6 deviation 1. Variable Importance for Projection (VIP) statistic of Wold, which summarizes the contribution of a variable maker to the model were used to identify the  
7 significant microbial genes associated with methane emissions. The P-values and R<sup>2</sup> were obtained by fitting a model including the gene and diet effects only.
