# Supplementary material
Source: publisher figshare collection journal article supplement (https://plos.figshare.com/articles/dataset/_/2585503)
Supplement: Supplementary file 1 [file 1 › S4 Table.pdf]

1 **Table S4. Microbial genes associated with feed conversion efficiency.** Partial least squares (PLS) estimates of effects of microbial genes characterised by  
2 the Kyoto Encyclopedia of Genes and Genomes (KEGG) database in an analysis where the PLS factors explained 80.6% of the variation in model effects and  
3 88.3% of the variation in feed conversion ratio (kg feed intake/kg growth).

| KEGG-ID,<br>breed, diet | Description                                                                              | Estimate | VIP   | P-value | R <sup>2</sup> |
|-------------------------|------------------------------------------------------------------------------------------|----------|-------|---------|----------------|
| Breed AA                | Aberdeen Angus                                                                           | -0.12465 | 1.777 | 0.361   | 0.139          |
| Breed LIM               | Limousin                                                                                 | 0.12465  | 1.777 | 0.361   | 0.139          |
| K02008                  | cobalt/nickel transport system permease protein                                          | 0.10440  | 1.542 | 0.030   | 0.798          |
| K00766                  | anthranilate phosphoribosyltransferase [EC:2.4.2.18]                                     | 0.08849  | 1.346 | 0.002   | 0.950          |
| K02377                  | GDP-L-fucose synthase [EC:1.1.1.271]                                                     | -0.07758 | 1.297 | 0.004   | 0.924          |
| K02907                  | large subunit ribosomal protein L30                                                      | 0.05671  | 1.149 | 0.074   | 0.693          |
| K00941                  | hydroxymethylpyrimidine/phosphomethylpyrimidine<br>kinase [EC:2.7.1.49 2.7.4.7]          | 0.05850  | 1.117 | 0.046   | 0.753          |
| K01195                  | beta-glucuronidase [EC:3.2.1.31]                                                         | -0.06401 | 1.111 | 0.090   | 0.664          |
| K03694                  | ATP-dependent Clp protease ATP-binding subunit ClpA                                      | -0.07025 | 1.079 | 0.066   | 0.707          |
| K07588                  | LAO/AO transport system kinase [EC:2.7.-.-]                                              | -0.06256 | 1.068 | 0.094   | 0.656          |
| K00179                  | indolepyruvate ferredoxin oxidoreductase, alpha subunit<br>[EC:1.2.7.8]                  | -0.07399 | 1.065 | 0.099   | 0.650          |
| K00375                  | GntR family transcriptional regulator / MocR family<br>aminotransferase                  | 0.02972  | 0.959 | 0.041   | 0.765          |
| K01876                  | aspartyl-tRNA synthetase [EC:6.1.1.12]                                                   | -0.05720 | 0.951 | 0.004   | 0.926          |
| K06921                  | Putative ATPase                                                                          | 0.03796  | 0.951 | 0.052   | 0.739          |
| K00075                  | UDP-N-acetylmuramate dehydrogenase [EC:1.1.1.158]                                        | -0.01437 | 0.948 | 0.093   | 0.658          |
| K01493                  | dCMP deaminase [EC:3.5.4.12]                                                             | 0.02527  | 0.946 | 0.038   | 0.773          |
| K00868                  | pyridoxine kinase [EC:2.7.1.35]                                                          | 0.02290  | 0.942 | 0.045   | 0.756          |
| K07139                  | Putative Fe-S oxidoreductase                                                             | -0.01605 | 0.937 | 0.065   | 0.710          |
| K02006                  | cobalt/nickel transport system ATP-binding protein                                       | 0.03217  | 0.934 | 0.079   | 0.682          |
| K00394                  | adenylylsulfate reductase, subunit A [EC:1.8.99.2]                                       | 0.02695  | 0.932 | 0.068   | 0.703          |
| K01814                  | phosphoribosylformimino-5-aminoimidazole<br>carboxamide ribotide isomerase [EC:5.3.1.16] | 0.03485  | 0.928 | 0.093   | 0.659          |

*Continued on next page*

Table S4 – Continued from previous page

|        |                                                                                                                                         |          |       |       |       |
|--------|-----------------------------------------------------------------------------------------------------------------------------------------|----------|-------|-------|-------|
|        | DNA helicase II / ATP-dependent DNA helicase PcrA                                                                                       |          |       |       |       |
| K03657 | [EC:3.6.4.12]                                                                                                                           | -0.00217 | 0.925 | 0.071 | 0.698 |
| K01784 | UDP-glucose 4-epimerase [EC:5.1.3.2]                                                                                                    | -0.02960 | 0.925 | 0.067 | 0.707 |
| K09811 | cell division transport system permease protein                                                                                         | -0.00675 | 0.919 | 0.053 | 0.736 |
| K04517 | prephenate dehydrogenase [EC:1.3.1.12]                                                                                                  | 0.03268  | 0.919 | 0.075 | 0.690 |
| K03581 | exodeoxyribonuclease V alpha subunit [EC:3.1.11.5]                                                                                      | 0.01700  | 0.917 | 0.051 | 0.739 |
|        | diaminohydroxyphosphoribosylaminopyrimidine<br>deaminase / 5-amino-6-(5-phosphoribosylamino)uracil<br>reductase [EC:3.5.4.26 1.1.1.193] | -0.01062 | 0.916 | 0.088 | 0.667 |
| K11752 |                                                                                                                                         |          |       |       |       |
| K01269 | aminopeptidase [EC:3.4.11.-]                                                                                                            | 0.01317  | 0.916 | 0.056 | 0.728 |
| K02313 | chromosomal replication initiator protein                                                                                               | -0.00515 | 0.915 | 0.084 | 0.673 |
| K03426 | NAD <sup>+</sup> diphosphatase [EC:3.6.1.22]                                                                                            | 0.02591  | 0.915 | 0.087 | 0.669 |
| K00773 | queuine tRNA-ribosyltransferase [EC:2.4.2.29]                                                                                           | -0.02257 | 0.910 | 0.073 | 0.694 |
|        | uroporphyrinogen III methyltransferase / synthase<br>[EC:2.1.1.107 4.2.1.75]                                                            | 0.02152  | 0.910 | 0.064 | 0.713 |
| K13542 |                                                                                                                                         |          |       |       |       |
| K03631 | DNA repair protein RecN (Recombination protein N)                                                                                       | 0.01067  | 0.905 | 0.048 | 0.747 |
| K08602 | oligoendopeptidase F [EC:3.4.24.-]                                                                                                      | 0.01777  | 0.904 | 0.083 | 0.676 |
| K00956 | sulfate adenylyltransferase subunit 1 [EC:2.7.7.4]                                                                                      | 0.00927  | 0.902 | 0.090 | 0.663 |
| K01924 | UDP-N-acetylmuramate--alanine ligase [EC:6.3.2.8]                                                                                       | -0.01173 | 0.901 | 0.087 | 0.668 |
|        | tRNA nucleotidyltransferase (CCA-adding enzyme)<br>[EC:2.7.7.72 3.1.3.- 3.1.4.-]                                                        | 0.01214  | 0.886 | 0.092 | 0.661 |
| K00974 |                                                                                                                                         |          |       |       |       |
| K01818 | L-fucose isomerase [EC:5.3.1.25]                                                                                                        | -0.04998 | 0.884 | 0.067 | 0.707 |
| K01129 | dGTPase [EC:3.1.5.1]                                                                                                                    | -0.01655 | 0.881 | 0.043 | 0.760 |
| K08483 | phosphotransferase system, enzyme I, PtsI [EC:2.7.3.9]                                                                                  | 0.00303  | 0.880 | 0.077 | 0.686 |
| K03458 | nucleobase:cation symporter-2, NCS2 family                                                                                              | 0.01331  | 0.873 | 0.090 | 0.663 |
| K03111 | single-strand DNA-binding protein                                                                                                       | 0.02467  | 0.869 | 0.010 | 0.883 |
| K00278 | L-aspartate oxidase [EC:1.4.3.16]                                                                                                       | -0.02361 | 0.868 | 0.082 | 0.678 |
| K03501 | glucose inhibited division protein B [EC:2.1.-.-]                                                                                       | -0.02020 | 0.862 | 0.066 | 0.707 |
| K02343 | DNA polymerase III subunit gamma/tau [EC:2.7.7.7]                                                                                       | 0.02796  | 0.850 | 0.008 | 0.891 |
| K01104 | protein-tyrosine phosphatase [EC:3.1.3.48]                                                                                              | 0.01502  | 0.843 | 0.025 | 0.815 |

Continued on next page

*Table S4 – Continued from previous page*

|          |                                                                                  |          |       |       |       |
|----------|----------------------------------------------------------------------------------|----------|-------|-------|-------|
| K07082   | UPF0755 protein                                                                  | -0.00521 | 0.837 | 0.076 | 0.687 |
| K01928   | UDP-N-acetylmuramoylalanyl-D-glutamate--2,6-diaminopimelate ligase [EC:6.3.2.13] | -0.01444 | 0.830 | 0.023 | 0.820 |
| Diet CON | Concentrate based diet                                                           | -0.05925 | 0.829 | 0.429 | 0.107 |
| Diet FOR | Forage based diet                                                                | 0.05925  | 0.829 | 0.429 | 0.107 |
| K03615   | electron transport complex protein RnfC                                          | 0.03462  | 0.819 | 0.049 | 0.745 |
| K01613   | phosphatidylserine decarboxylase [EC:4.1.1.65]                                   | 0.01464  | 0.799 | 0.009 | 0.888 |
| K01358   | ATP-dependent Clp protease, protease subunit [EC:3.4.21.92]                      | -0.03591 | 0.731 | 0.020 | 0.833 |

Two factors were significant in the partial least squares analysis. Without considering diet and breed in the model, , the microbial genes explained 83.9% of the variation of model effects and 85.5% of the variation in feed conversion ratio. The PLS estimates were based on predictors and responses centered and scaled to have mean 0 and standard deviation 1. Variable Importance for Projection (VIP) statistic of Wold, which summarizes the contribution of a variable maker to the model were used to identify the significant microbial genes associated with feed conversion ratio. The P-value and  $R^2$  were obtained by fitting a model including the gene and diet effects only.
